# Supplementary material for: A Non-stop identity complex (NIC) supervises enterocyte identity and protects from premature aging
Source: eLife journal article supplement (doi:10.7554/elife.62312), 2021-02-25
Supplement: supp [file elife-62312-supp-v1.zip]

Archive with 23 entries (23 files):
- elife_poa_e62312_Figure_1_figure_supplement_1.pdf
- elife_poa_e62312_Figure_1_figure_supplement_2.pdf
- elife_poa_e62312_Figure_2_figure_supplement_1.pdf
- elife_poa_e62312_Figure_2_figure_supplement_2.pdf
- elife_poa_e62312_Figure_2_figure_supplement_3.pdf
- elife_poa_e62312_Figure_3_figure_supplement_1.pdf
- elife_poa_e62312_Figure_5_figure_supplement_1.pdf
- elife_poa_e62312_Figure_5_figure_supplement_2.pdf
- elife_poa_e62312_Figure_6_figure_supplement_1.pdf
- elife_poa_e62312_Figure_8_figure_supplement_1.pdf
- elife_poa_e62312_Figure_1_source_data_2.xlsx
- elife_poa_e62312_Figure_3_source_data_1.xlsx
- elife_poa_e62312_Figure_5_source_data_1.xls
- elife_poa_e62312_Figure_5_source_data_2.xlsx
- elife_poa_e62312_Figure_5_source_data_3.xlsx
- elife_poa_e62312_Figure_1_source_data_1.xlsx
- elife_poa_e62312_Figure_2_source_data_1.xlsx
- elife_poa_e62312_Figure_4_source_data_1.xlsx
- elife_poa_e62312_Figure_6_source_data_1.xlsx
- elife_poa_e62312_Figure_7_source_data_1.xlsx
- elife_poa_e62312_Figure_9_source_data_1.xlsx
- elife_poa_e62312_Supplementary_file_1.xlsx
- elife_poa_e62312_Transparent_Reporting_File.pdf
