# Supplementary material for: A Non-stop identity complex (NIC) supervises enterocyte identity and protects from premature aging
Source: eLife journal article supplement (doi:10.7554/elife.62312), 2021-02-25
Supplement: supp [file elife-62312-supp-v1.zip › elife_poa_e62312_Figure_1_source_data_1.xlsx]

## Sheet: 1G
	Quantification data related to Fig 1'G - % PPC delta(+)/ EC)
		total PPC	delta(+) PPC's	%PPC delta (+)
	Myo>GFP	136	1	0.735294
		128	0	0
		125	0	0
	Myo>Not-RNAi	120	27	22.5
		107	17	15.8879
		56	16	28.5714

## Sheet: 1H
	Quantification data related to Fig 1'H - % PPC prospero(+)/ EC)
		total PPC	prospero (+) PPC's	%PPC prospero (+)
	Myo>GFP	157	16	10.1911
		152	14	9.21053
		123	9	7.31707
		116	7	6.03448
		75	9	12
	Myo>NotOE	219	48	21.9178
		240	54	22.5
		217	38	17.5115
		179	18	10.0559
		340	48	14.1176

## Sheet: 1Q
Quantification data related to Fig 1Q - % PPC M5-4(+)
	total cells	total PP cells	PP cells M54 +	% PP cells M54 +
control	152	106	0	0
	107	69	0	0
	108	70	5	7.14286
	111	65	0	0
Myo-GTRACE-Noti-M54	179	97	20	20.6186
	202	98	21	21.4286

## Sheet: 1Ptag
Quantification data related to Fig 1P' - Smurf Flies (%)
LacZ	noti 45776
0	22
0	27
0	23

## Sheet: 1R
Quantification data related to Fig 1R -Survival (%)
