# Supplementary material for: A Non-stop identity complex (NIC) supervises enterocyte identity and protects from premature aging
Source: eLife journal article supplement (doi:10.7554/elife.62312), 2021-02-25
Supplement: supp [file elife-62312-supp-v1.zip › elife_poa_e62312_Figure_2_source_data_1.xlsx]

## Sheet: Fig 2J
Quantification data related to Fig 2H - GTRACE count of different cell types in Non-stop-RNAi Vs control
	Normal ECs						PPC**						PPC*
Control	100	100	100	100	100	100	0	0	0	0	0	0	0	0	0	0	0	0
Non-stopRNAi	58	50	46	44	33	24	7	13	17	12	28	8	30	19	16	20	41	22

## Sheet: Fig 2R
	Odd-skipped positive cells			Delta positive cells
2Days ECs	100	100	100	0	0	0
4 weeks ECs	60	50	60	6	8	6
4 weeks PPC**	0	2	0	20	22	16
4 weeks PPC*	10	12	12	4	6	6
