# Supplementary material for: A Non-stop identity complex (NIC) supervises enterocyte identity and protects from premature aging
Source: eLife journal article supplement (doi:10.7554/elife.62312), 2021-02-25
Supplement: supp [file elife-62312-supp-v1.zip › elife_poa_e62312_Figure_3_source_data_1.xlsx]

## Sheet: Fig1D-2A
											Column ends with:
											_P	Peptide Count			_S	Spectral Count
											_dS	Distributed Spectral Count			_sS	Shared Spectral Count
											_SC	Sequence Coverage (%)			_uS	Unique Spectral Count
Table 2A											_dNSAF	Distributed Normalized Spectral Abundance Factor			_uDP	Unique Detected Peptides
																								FLAG-IP Eluate (Size Exclusion Input)								Size Exclusion Group 2, Biological Rep #1								Size Exclusion Group 2, Biological Rep #2								Size Exclusion Group 2, Biological Rep #3
Locus_Tag	Protein	Input dSpectral Counts	Input dNSAF	Group 2 dSpectral Count AVG	Group2 dNSAF AVG	Group2 Detected # Out of 3	Control dSpectral Counts	Control dNSAF		dNSAF_Rank	Input dNSAF AVG	Input Detected # Out of 1	Group2 dNSAF AVG	Group2 Detected # Out of 3	Control dNSAF AVG	Control Detected # Out of 1	Input:Control	Total Proteins In Group	Proteins In Group	Locus	Description	NCBI_Locus_Tag	NCBI_Gene	FLAG-HA-Not_FLAG-IP_P	FLAG-HA-Not_FLAG-IP_S	FLAG-HA-Not_FLAG-IP_uS	FLAG-HA-Not_FLAG-IP_uDP	FLAG-HA-Not_FLAG-IP_sS	FLAG-HA-Not_FLAG-IP_dS	FLAG-HA-Not_FLAG-IP_SC	FLAG-HA-Not_FLAG-IP_dNSAF	FLAG-HA-Not_8-4_FLAG-IP_P	FLAG-HA-Not_8-4_FLAG-IP_S	FLAG-HA-Not_8-4_FLAG-IP_uS	FLAG-HA-Not_8-4_FLAG-IP_uDP	FLAG-HA-Not_8-4_FLAG-IP_sS	FLAG-HA-Not_8-4_FLAG-IP_dS	FLAG-HA-Not_8-4_FLAG-IP_SC	FLAG-HA-Not_8-4_FLAG-IP_dNSAF	FLAG-HA-Not_12-4_FLAG-IP_P	FLAG-HA-Not_12-4_FLAG-IP_S	FLAG-HA-Not_12-4_FLAG-IP_uS	FLAG-HA-Not_12-4_FLAG-IP_uDP	FLAG-HA-Not_12-4_FLAG-IP_sS	FLAG-HA-Not_12-4_FLAG-IP_dS	FLAG-HA-Not_12-4_FLAG-IP_SC	FLAG-HA-Not_12-4_FLAG-IP_dNSAF	FLAG-HA-Not_12-11_FLAG-IP_P	FLAG-HA-Not_12-11_FLAG-IP_S
	Not	69	0.00102334	41	0.002358	3	n.d	n.d		1	0.001023	1	0.002358	3	0	0	1.79769e+308	1	gi|rmo_Not|	gi|rmo_Not|	rmo sequence for non-stop [Drosophila melanogaster]		Not	14	69	69	14	0	69	21.91	0.00102334	13	55	55	13	0	55	17.5	0.00372805	10	21	21	10	0	21	18.63	0.00084274	17	47
CG13379	Sgf11	8	0.00042556	10.6667	0.001936	3	n.d	n.d		70	0.000426	1	0.001936	3	0	0	1.79769e+308	1	NP_001097638.1	NP_001097638.1	SAGA associated factor 11kDa [Drosophila melanogaster]	CG13379	Sgf11	2	8	8	2	0	8	16.84	0.00042556	2	5	5	2	0	5	16.84	0.00121559	2	12	12	2	0	12	22.96	0.00172724	3	15
CG9638	Ada2b	20	0.00037572	8	0.000599	2	n.d	n.d		357	0.000376	1	0.000599	2	0	0	1.79769e+308	1	NP_001027151.1	NP_001027151.1	transcriptional adaptor 2b, isoform B [Drosophila melanogaster]	CG9638	Ada2b	4	20	20	4	0	20	10.09	0.00037572	6	11	11	6	0	11	16.58	0.00094444	3	5	5	3	0	5	8.65	0.00025416	X	X
CG33554	Nipped-A	128	0.00035213	47.6667	0.000544	3	n.d	n.d		91	0.000352	1	0.000544	3	0	0	1.79769e+308	1	NP_001097192.2	NP_001097192.2	Nipped-A, isoform E [Drosophila melanogaster]	CG33554	Nipped-A	35	128	128	35	0	128	12.37	0.00035213	39	99	99	39	0	99	17.1	0.00124472	10	20	20	10	0	20	5.2	0.00014887	15	24
CG15191	e(y)2	23	0.00237429	8.33333	0.003375	3	n.d	n.d		13	0.002374	1	0.003375	3	0	0	1.79769e+308	1	NP_524846.1	NP_524846.1	enhancer of yellow 2 [Drosophila melanogaster]	CG15191	e(y)2	1	23	23	1	0	23	17.82	0.00237429	2	13	13	2	0	13	25.74	0.00613332	1	5	5	1	0	5	17.82	0.00139661	1	7
CG30390	Sgf29	10	0.00036077	3.33333	0.000448	3	n.d	n.d		88	0.000361	1	0.000448	3	0	0	1.79769e+308	1	NP_726051.1	NP_726051.1	SAGA-associated factor 29kDa, isoform A [Drosophila melanogaster]	CG30390	Sgf29	4	10	10	4	0	10	18.34	0.00036077	3	5	5	3	0	5	14.88	0.00082442	1	4	4	1	0	4	6.57	0.00039047	1	1
CG4107	Gcn5	22	0.00028214	10.3333	0.000516	3	n.d	n.d		107	0.000282	1	0.000516	3	0	0	1.79769e+308	1	NP_648586.2	NP_648586.2	Gcn5 acetyltransferase [Drosophila melanogaster]	CG4107	Gcn5	9	22	22	9	0	22	13.78	0.00028214	8	16	16	8	0	16	12.79	0.00093779	3	7	7	3	0	7	5.29	0.0002429	5	8
CG3069	Taf10b	4	0.00028565	2	0.000653	1	n.d	n.d		580	0.000286	1	0.000653	1	0	0	1.79769e+308	1	NP_477418.1	NP_477418.1	TBP-associated factor 10b [Drosophila melanogaster]	CG3069	Taf10b	1	4	4	1	0	4	13.7	0.00028565	1	2	2	1	0	2	13.7	0.00065276	X	X	X	X	X	X	X	X	X	X
CG9866	Atxn7	15	0.00016106	2.66667	9.7e-05	3	n.d	n.d		148	0.000161	1	9.7e-05	3	0	0	1.79769e+308	1	NP_608677.1	NP_608677.1	ataxin 7, isoform A [Drosophila melanogaster]	CG9866	Atxn7	5	15	15	5	0	15	6.08	0.00016106	1	2	2	1	0	2	1.03	9.815e-05	2	4	4	2	0	4	4.22	0.00011622	1	2
CG6474	e(y)1	8	0.00030004	5	0.00082	2	n.d	n.d		365	0.0003	1	0.00082	2	0	0	1.79769e+308	1	NP_523391.3	NP_523391.3	enhancer of yellow 1 [Drosophila melanogaster]	CG6474	e(y)1	2	8	8	2	0	8	7.55	0.00030004	1	8	8	1	0	8	3.96	0.00137126	X	X	X	X	X	X	X	X	1	2
CG33853	His2A	262	0.0220296	48.9753	0.015337	3	n.d	n.d		2	0.02203	1	0.015337	3	0	0	1.79769e+308	1	NP_001027366.1	NP_001027366.1	histone H2A [Drosophila melanogaster]	CG33853	His2A	2	262	262	2	0	262	41.94	0.0220296	3	66	66	3	0	66	47.58	0.0253627	4	51	50	3	1	50.9259	53.23	0.0115863	2	30
CG17949	His2B	38	0.00322112	9	0.002744	3	n.d	n.d		12	0.003221	1	0.002744	3	0	0	1.79769e+308	1	NP_724342.1	NP_724342.1	histone H2B [Drosophila melanogaster]	CG17949	His2B	5	38	38	5	0	38	34.96	0.00322112	1	11	11	1	0	11	12.2	0.00426149	2	12	12	2	0	12	20.33	0.00275235	1	4
CG7558	Arp3	36	0.00089795	12.3333	0.001218	3	n.d	n.d		38	0.000898	1	0.001218	3	0	0	1.79769e+308	1	NP_523968.1	NP_523968.1	Actin-related protein 3, isoform A [Drosophila melanogaster]	CG7558	Arp3	8	36	36	8	0	36	33.97	0.00089795	8	23	23	8	0	23	36.12	0.00262196	5	10	10	5	0	10	25.6	0.00067492	3	4
CG9901	Arp2	12	0.00031755	5.66667	0.000619	3	n.d	n.d		99	0.000318	1	0.000619	3	0	0	1.79769e+308	1	NP_523372.2	NP_523372.2	Actin-related protein 2, isoform A [Drosophila melanogaster]	CG9901	Arp2	5	12	12	5	0	12	16.24	0.00031755	5	12	12	5	0	12	18.53	0.00145131	3	3	3	3	0	3	10.41	0.00021481	2	2
CG8978	Arpc1	6	0.00016593	7	0.000807	2	n.d	n.d		382	0.000166	1	0.000807	2	0	0	1.79769e+308	1	NP_476596.1	NP_476596.1	Actin-related protein 2/3 complex, subunit 1, isoform A [Drosophila melanogaster]	CG8978	Arpc1	1	6	6	1	0	6	5.31	0.00016593	4	11	11	4	0	11	17.24	0.00139035	3	3	3	3	0	3	13.79	0.0002245	X	X
CG10954	Arpc2	37	0.00128163	4.33333	0.000577	3	n.d	n.d		29	0.001282	1	0.000577	3	0	0	1.79769e+308	1	NP_610033.1	NP_610033.1	Actin-related protein 2/3 complex, subunit 2, isoform A [Drosophila melanogaster]	CG10954	Arpc2	4	37	37	4	0	37	17.28	0.00128163	3	7	7	3	0	7	13.29	0.00110817	2	4	4	2	0	4	8.64	0.0003749	1	2
CG4560	Arpc3A	26	0.00153154	8	0.002044	2	n.d	n.d		336	0.001532	1	0.002044	2	0	0	1.79769e+308	1	NP_650498.3	NP_650498.3	Actin-related protein 2/3 complex, subunit 3A, isoform C [Drosophila melanogaster]	CG4560	Arpc3A	2	26	26	2	0	26	21.47	0.00153154	2	14	14	2	0	14	21.47	0.00376902	2	2	2	2	0	2	21.47	0.00031877	X	X
CG8936	Arpc3B	1	6.641e-05	1	0.000242	2	n.d	n.d		416	6.6e-05	1	0.000242	2	0	0	1.79769e+308	2	NP_001097009.1;NP_573193.1	NP_001097009.1	Actin-related protein 2/3 complex, subunit 3B, isoform B [Drosophila melanogaster]	CG8936	Arpc3B	1	1	1	1	0	1	8.92	6.641e-05	1	1	1	1	0	1	13.38	0.00030351	1	1	1	1	0	1	13.38	0.00017969	X	X
CG5972	Arpc4	9	0.00055855	6.66667	0.001637	3	n.d	n.d		56	0.000559	1	0.001637	3	0	0	1.79769e+308	1	NP_608996.1	NP_608996.1	Actin-related protein 2/3 complex, subunit 4 [Drosophila melanogaster]	CG5972	Arpc4	4	9	9	4	0	9	29.76	0.00055855	5	12	12	5	0	12	42.26	0.00340366	3	5	5	3	0	5	28.57	0.00083963	2	3
CG9881	Arpc5	17	0.00117382	6	0.001826	2	n.d	n.d		339	0.001174	1	0.001826	2	0	0	1.79769e+308	1	NP_608693.1	NP_608693.1	Actin-related protein 2/3 complex, subunit 5, isoform A [Drosophila melanogaster]	CG9881	Arpc5	3	17	17	3	0	17	41.06	0.00117382	3	10	10	3	0	10	30.46	0.00315571	X	X	X	X	X	X	X	X	2	2
CG4636	SCAR	n.d	n.d.	3.5	0.000184	2	n.d	n.d.		761	0	0	0.000184	2	0	0	0	6	NP_001245966.1;NP_001245967.1;NP_001260368.1;NP_001260369.1;NP_001285824.1;NP_609477.1	NP_001245966.1	SCAR, isoform B [Drosophila melanogaster]	CG4636	SCAR	X	X	X	X	X	X	X	X	1	2	2	1	0	2	2.03	0.00014868	3	5	5	3	0	5	8.11	0.00022006	X	X
CG5837	Hem	2	1.852e-05	3.5	9.2e-05	2	n.d	n.d		475	1.9e-05	1	9.2e-05	2	0	0	1.79769e+308	1	NP_524214.1	NP_524214.1	HEM-protein [Drosophila melanogaster]	CG5837	Hem	1	2	2	1	0	2	1.07	1.852e-05	X	X	X	X	X	X	X	X	4	6	6	4	0	6	5.68	0.00015033	1	1
CG4931	Sra-1	5	4.038e-05	4.5	0.000105	2	n.d	n.d		441	4e-05	1	0.000105	2	0	0	1.79769e+308	1	NP_650447.1	NP_650447.1	specifically Rac1-associated protein 1 [Drosophila melanogaster]	CG4931	Sra-1	2	5	5	2	0	5	2.25	4.038e-05	X	X	X	X	X	X	X	X	4	7	7	4	0	7	5.34	0.00015297	1	2
CG10198	Nup98-96	24	0.00012767	7.66667	0.000156	3	n.d	n.d		177	0.000128	1	0.000156	3	0	0	1.79769e+308	1	NP_651187.2	NP_651187.2	nucleoporin 98-96kD, isoform A [Drosophila melanogaster]	CG10198	Nup98-96	4	24	24	4	0	24	3.42	0.00012767	5	11	11	5	0	11	4.64	0.00026743	4	6	6	4	0	6	3.21	8.636e-05	4	6
CG32491	mod(mdg4)	8	0.00017092	3	0.000245	3	n.d	n.d		144	0.000171	1	0.000245	3	0	0	1.79769e+308	31	NP_001097856.1;NP_001097857.1;NP_001097858.1;NP_001247228.1;NP_001247229.1;NP_524936.2;NP_732619.1;NP_732620.1;NP_732621.1;NP_732622.1;NP_732623.2;NP_732624.1;NP_732625.1;NP_732626.1;NP_732627.1;NP_732628.1;NP_732629.1;NP_732630.1;NP_732631.1;NP_732632.1;NP_732633.1;NP_732634.1;NP_732635.1;NP_732636.1;NP_788698.1;NP_788699.1;NP_788700.1;NP_788701.1;NP_788702.1;NP_788703.1;NP_788704.1	NP_001097856.1	modifier of mdg4, isoform AA [Drosophila melanogaster]	CG32491	mod(mdg4)	3	8	8	3	0	8	8.61	0.00017092	2	4	4	2	0	4	5.53	0.00039058	1	2	2	1	0	2	2.25	0.00011562	2	3
CG6384	Cp190	7	6.659e-05	1.66667	6.3e-05	3	n.d	n.d		238	6.7e-05	1	6.3e-05	3	0	0	1.79769e+308	1	NP_524359.2	NP_524359.2	centrosomal protein 190kD, isoform A [Drosophila melanogaster]	CG6384	Cp190	3	7	7	3	0	7	4.84	6.659e-05	3	3	3	3	0	3	4.29	0.00013043	1	1	1	1	0	1	3.01	2.574e-05	1	1
Locus_Tag	Protein	Input dSpectral Counts	Input dNSAF	Group 2 dSpectral Count AVG	Group2 dNSAF AVG	Group2 Detected # Out of 3	Control dSpectral Counts	Control dNSAF
	Not	69	0.00102334	41	0.002358	3	n.d	n.d
CG13379	Sgf11	8	0.00042556	10.6667	0.001936	3	n.d	n.d
CG15191	e(y)2	23	0.00237429	8.33333	0.003375	3	n.d	n.d
CG33853	His2A	262	0.0220296	48.9753	0.015337	3	n.d	n.d
CG17949	His2B	38	0.00322112	9	0.002744	3	n.d	n.d
CG10198	Nup98-96	24	0.00012767	7.66667	0.000156	3	n.d	n.d
CG32491	mod(mdg4)	8	0.00017092	3	0.000245	3	n.d	n.d
CG6384	Cp190	7	6.659e-05	1.66667	6.3e-05	3	n.d	n.d
[truncated: 33 more columns]

## Sheet: SuppTable
Supporting Table: Proteins detected by MudPIT analyses of FLAG-HA-Non-Stop FLAG-IPed from Drosophila melanogaster S2 cells
Mass spectrometry data deposited at the https://massive.ucsd.edu/ with MassIVE ID # MSV000082625 and password: VCRDM01146
	Column ends with:
	_P	Peptide Count			_S	Spectral Count
	_dS	Distributed Spectral Count			_sS	Shared Spectral Count
	_SC	Sequence Coverage (%)			_uS	Unique Spectral Count
	_dNSAF	Distributed Normalized Spectral Abundance Factor			_uDP	Unique Detected Peptides
														FLAG-IP Eluate (Size Exclusion Input)								Size Exclusion Group 2, Biological Rep #1								Size Exclusion Group 2, Biological Rep #2								Size Exclusion Group 2, Biological Rep #3								FLAG-IP Control Eluate
dNSAF_Rank	Input dNSAF AVG	Input Detected # Out of 1	Group2 dNSAF AVG	Group2 Detected # Out of 3	Control dNSAF AVG	Control Detected # Out of 1	Input:Control	Total Proteins In Group	Proteins In Group	Locus	Description	NCBI_Locus_Tag	NCBI_Gene	FLAG-HA-Not_FLAG-IP_P	FLAG-HA-Not_FLAG-IP_S	FLAG-HA-Not_FLAG-IP_uS	FLAG-HA-Not_FLAG-IP_uDP	FLAG-HA-Not_FLAG-IP_sS	FLAG-HA-Not_FLAG-IP_dS	FLAG-HA-Not_FLAG-IP_SC	FLAG-HA-Not_FLAG-IP_dNSAF	FLAG-HA-Not_8-4_FLAG-IP_P	FLAG-HA-Not_8-4_FLAG-IP_S	FLAG-HA-Not_8-4_FLAG-IP_uS	FLAG-HA-Not_8-4_FLAG-IP_uDP	FLAG-HA-Not_8-4_FLAG-IP_sS	FLAG-HA-Not_8-4_FLAG-IP_dS	FLAG-HA-Not_8-4_FLAG-IP_SC	FLAG-HA-Not_8-4_FLAG-IP_dNSAF	FLAG-HA-Not_12-4_FLAG-IP_P	FLAG-HA-Not_12-4_FLAG-IP_S	FLAG-HA-Not_12-4_FLAG-IP_uS	FLAG-HA-Not_12-4_FLAG-IP_uDP	FLAG-HA-Not_12-4_FLAG-IP_sS	FLAG-HA-Not_12-4_FLAG-IP_dS	FLAG-HA-Not_12-4_FLAG-IP_SC	FLAG-HA-Not_12-4_FLAG-IP_dNSAF	FLAG-HA-Not_12-11_FLAG-IP_P	FLAG-HA-Not_12-11_FLAG-IP_S	FLAG-HA-Not_12-11_FLAG-IP_uS	FLAG-HA-Not_12-11_FLAG-IP_uDP	FLAG-HA-Not_12-11_FLAG-IP_sS	FLAG-HA-Not_12-11_FLAG-IP_dS	FLAG-HA-Not_12-11_FLAG-IP_SC	FLAG-HA-Not_12-11_FLAG-IP_dNSAF	FLAG-HA-Control_P	FLAG-HA-Control_S	FLAG-HA-Control_uS	FLAG-HA-Control_uDP
1	0.001023	1	0.002358	3	0	0	1.79769e+308	1	gi|rmo_Not|	gi|rmo_Not|	rmo sequence for non-stop [Drosophila melanogaster]		Not	14	69	69	14	0	69	21.91	0.00102334	13	55	55	13	0	55	17.5	0.00372805	10	21	21	10	0	21	18.63	0.00084274	17	47	47	17	0	47	28.02	0.00250405	X	X	X	X
70	0.000426	1	0.001936	3	0	0	1.79769e+308	1	NP_001097638.1	NP_001097638.1	SAGA associated factor 11kDa [Drosophila melanogaster]	CG13379	Sgf11	2	8	8	2	0	8	16.84	0.00042556	2	5	5	2	0	5	16.84	0.00121559	2	12	12	2	0	12	22.96	0.00172724	3	15	15	3	0	15	31.63	0.0028664	X	X	X	X
357	0.000376	1	0.000599	2	0	0	1.79769e+308	1	NP_001027151.1	NP_001027151.1	transcriptional adaptor 2b, isoform B [Drosophila melanogaster]	CG9638	Ada2b	4	20	20	4	0	20	10.09	0.00037572	6	11	11	6	0	11	16.58	0.00094444	3	5	5	3	0	5	8.65	0.00025416	X	X	X	X	X	X	X	X	X	X	X	X
91	0.000352	1	0.000544	3	0	0	1.79769e+308	1	NP_001097192.2	NP_001097192.2	Nipped-A, isoform E [Drosophila melanogaster]	CG33554	Nipped-A	35	128	128	35	0	128	12.37	0.00035213	39	99	99	39	0	99	17.1	0.00124472	10	20	20	10	0	20	5.2	0.00014887	15	24	24	15	0	24	7.6	0.00023718	X	X	X	X
13	0.002374	1	0.003375	3	0	0	1.79769e+308	1	NP_524846.1	NP_524846.1	enhancer of yellow 2 [Drosophila melanogaster]	CG15191	e(y)2	1	23	23	1	0	23	17.82	0.00237429	2	13	13	2	0	13	25.74	0.00613332	1	5	5	1	0	5	17.82	0.00139661	1	7	7	1	0	7	17.82	0.00259584	X	X	X	X
88	0.000361	1	0.000448	3	0	0	1.79769e+308	1	NP_726051.1	NP_726051.1	SAGA-associated factor 29kDa, isoform A [Drosophila melanogaster]	CG30390	Sgf29	4	10	10	4	0	10	18.34	0.00036077	3	5	5	3	0	5	14.88	0.00082442	1	4	4	1	0	4	6.57	0.00039047	1	1	1	1	0	1	3.11	0.0001296	X	X	X	X
107	0.000282	1	0.000516	3	0	0	1.79769e+308	1	NP_648586.2	NP_648586.2	Gcn5 acetyltransferase [Drosophila melanogaster]	CG4107	Gcn5	9	22	22	9	0	22	13.78	0.00028214	8	16	16	8	0	16	12.79	0.00093779	3	7	7	3	0	7	5.29	0.0002429	5	8	8	5	0	8	10.46	0.00036855	X	X	X	X
580	0.000286	1	0.000653	1	0	0	1.79769e+308	1	NP_477418.1	NP_477418.1	TBP-associated factor 10b [Drosophila melanogaster]	CG3069	Taf10b	1	4	4	1	0	4	13.7	0.00028565	1	2	2	1	0	2	13.7	0.00065276	X	X	X	X	X	X	X	X	X	X	X	X	X	X	X	X	X	X	X	X
148	0.000161	1	9.7e-05	3	0	0	1.79769e+308	1	NP_608677.1	NP_608677.1	ataxin 7, isoform A [Drosophila melanogaster]	CG9866	Atxn7	5	15	15	5	0	15	6.08	0.00016106	1	2	2	1	0	2	1.03	9.815e-05	2	4	4	2	0	4	4.22	0.00011622	1	2	2	1	0	2	1.03	7.715e-05	X	X	X	X
365	0.0003	1	0.00082	2	0	0	1.79769e+308	1	NP_523391.3	NP_523391.3	enhancer of yellow 1 [Drosophila melanogaster]	CG6474	e(y)1	2	8	8	2	0	8	7.55	0.00030004	1	8	8	1	0	8	3.96	0.00137126	X	X	X	X	X	X	X	X	1	2	2	1	0	2	3.96	0.00026946	X	X	X	X
2	0.02203	1	0.015337	3	0	0	1.79769e+308	1	NP_001027366.1	NP_001027366.1	histone H2A [Drosophila melanogaster]	CG33853	His2A	2	262	262	2	0	262	41.94	0.0220296	3	66	66	3	0	66	47.58	0.0253627	4	51	50	3	1	50.9259	53.23	0.0115863	2	30	30	2	0	30	41.94	0.00906151	X	X	X	X
12	0.003221	1	0.002744	3	0	0	1.79769e+308	1	NP_724342.1	NP_724342.1	histone H2B [Drosophila melanogaster]	CG17949	His2B	5	38	38	5	0	38	34.96	0.00322112	1	11	11	1	0	11	12.2	0.00426149	2	12	12	2	0	12	20.33	0.00275235	1	4	4	1	0	4	12.2	0.00121802	X	X	X	X
38	0.000898	1	0.001218	3	0	0	1.79769e+308	1	NP_523968.1	NP_523968.1	Actin-related protein 3, isoform A [Drosophila melanogaster]	CG7558	Arp3	8	36	36	8	0	36	33.97	0.00089795	8	23	23	8	0	23	36.12	0.00262196	5	10	10	5	0	10	25.6	0.00067492	3	4	4	3	0	4	16.99	0.00035841	X	X	X	X
99	0.000318	1	0.000619	3	0	0	1.79769e+308	1	NP_523372.2	NP_523372.2	Actin-related protein 2, isoform A [Drosophila melanogaster]	CG9901	Arp2	5	12	12	5	0	12	16.24	0.00031755	5	12	12	5	0	12	18.53	0.00145131	3	3	3	3	0	3	10.41	0.00021481	2	2	2	2	0	2	7.36	0.00019012	X	X	X	X
382	0.000166	1	0.000807	2	0	0	1.79769e+308	1	NP_476596.1	NP_476596.1	Actin-related protein 2/3 complex, subunit 1, isoform A [Drosophila melanogaster]	CG8978	Arpc1	1	6	6	1	0	6	5.31	0.00016593	4	11	11	4	0	11	17.24	0.00139035	3	3	3	3	0	3	13.79	0.0002245	X	X	X	X	X	X	X	X	X	X	X	X
29	0.001282	1	0.000577	3	0	0	1.79769e+308	1	NP_610033.1	NP_610033.1	Actin-related protein 2/3 complex, subunit 2, isoform A [Drosophila melanogaster]	CG10954	Arpc2	4	37	37	4	0	37	17.28	0.00128163	3	7	7	3	0	7	13.29	0.00110817	2	4	4	2	0	4	8.64	0.0003749	1	2	2	1	0	2	3.65	0.00024887	X	X	X	X
336	0.001532	1	0.002044	2	0	0	1.79769e+308	1	NP_650498.3	NP_650498.3	Actin-related protein 2/3 complex, subunit 3A, isoform C [Drosophila melanogaster]	CG4560	Arpc3A	2	26	26	2	0	26	21.47	0.00153154	2	14	14	2	0	14	21.47	0.00376902	2	2	2	2	0	2	21.47	0.00031877	X	X	X	X	X	X	X	X	X	X	X	X
416	6.6e-05	1	0.000242	2	0	0	1.79769e+308	2	NP_001097009.1;NP_573193.1	NP_001097009.1	Actin-related protein 2/3 complex, subunit 3B, isoform B [Drosophila melanogaster]	CG8936	Arpc3B	1	1	1	1	0	1	8.92	6.641e-05	1	1	1	1	0	1	13.38	0.00030351	1	1	1	1	0	1	13.38	0.00017969	X	X	X	X	X	X	X	X	X	X	X	X
56	0.000559	1	0.001637	3	0	0	1.79769e+308	1	NP_608996.1	NP_608996.1	Actin-related protein 2/3 complex, subunit 4 [Drosophila melanogaster]	CG5972	Arpc4	4	9	9	4	0	9	29.76	0.00055855	5	12	12	5	0	12	42.26	0.00340366	3	5	5	3	0	5	28.57	0.00083963	2	3	3	2	0	3	18.45	0.00066883	X	X	X	X
339	0.001174	1	0.001826	2	0	0	1.79769e+308	1	NP_608693.1	NP_608693.1	Actin-related protein 2/3 complex, subunit 5, isoform A [Drosophila melanogaster]	CG9881	Arpc5	3	17	17	3	0	17	41.06	0.00117382	3	10	10	3	0	10	30.46	0.00315571	X	X	X	X	X	X	X	X	2	2	2	2	0	2	24.5	0.00049608	X	X	X	X
761	0	0	0.000184	2	0	0	0	6	NP_001245966.1;NP_001245967.1;NP_001260368.1;NP_001260369.1;NP_001285824.1;NP_609477.1	NP_001245966.1	SCAR, isoform B [Drosophila melanogaster]	CG4636	SCAR	X	X	X	X	X	X	X	X	1	2	2	1	0	2	2.03	0.00014868	3	5	5	3	0	5	8.11	0.00022006	X	X	X	X	X	X	X	X	X	X	X	X
475	1.9e-05	1	9.2e-05	2	0	0	1.79769e+308	1	NP_524214.1	NP_524214.1	HEM-protein [Drosophila melanogaster]	CG5837	Hem	1	2	2	1	0	2	1.07	1.852e-05	X	X	X	X	X	X	X	X	4	6	6	4	0	6	5.68	0.00015033	1	1	1	1	0	1	2.31	3.326e-05	X	X	X	X
441	4e-05	1	0.000105	2	0	0	1.79769e+308	1	NP_650447.1	NP_650447.1	specifically Rac1-associated protein 1 [Drosophila melanogaster]	CG4931	Sra-1	2	5	5	2	0	5	2.25	4.038e-05	X	X	X	X	X	X	X	X	4	7	7	4	0	7	5.34	0.00015297	1	2	2	1	0	2	1.55	5.802e-05	X	X	X	X
177	0.000128	1	0.000156	3	0	0	1.79769e+308	1	NP_651187.2	NP_651187.2	nucleoporin 98-96kD, isoform A [Drosophila melanogaster]	CG10198	Nup98-96	4	24	24	4	0	24	3.42	0.00012767	5	11	11	5	0	11	4.64	0.00026743	4	6	6	4	0	6	3.21	8.636e-05	4	6	6	4	0	6	3.88	0.00011466	X	X	X	X
144	0.000171	1	0.000245	3	0	0	1.79769e+308	31	NP_001097856.1;NP_001097857.1;NP_001097858.1;NP_001247228.1;NP_001247229.1;NP_524936.2;NP_732619.1;NP_732620.1;NP_732621.1;NP_732622.1;NP_732623.2;NP_732624.1;NP_732625.1;NP_732626.1;NP_732627.1;NP_732628.1;NP_732629.1;NP_732630.1;NP_732631.1;NP_732632.1;NP_732633.1;NP_732634.1;NP_732635.1;NP_732636.1;NP_788698.1;NP_788699.1;NP_788700.1;NP_788701.1;NP_788702.1;NP_788703.1;NP_788704.1	NP_001097856.1	modifier of mdg4, isoform AA [Drosophila melanogaster]	CG32491	mod(mdg4)	3	8	8	3	0	8	8.61	0.00017092	2	4	4	2	0	4	5.53	0.00039058	1	2	2	1	0	2	2.25	0.00011562	2	3	3	2	0	3	5.74	0.00023025	X	X	X	X
238	6.7e-05	1	6.3e-05	3	0	0	1.79769e+308	1	NP_524359.2	NP_524359.2	centrosomal protein 190kD, isoform A [Drosophila melanogaster]	CG6384	Cp190	3	7	7	3	0	7	4.84	6.659e-05	3	3	3	3	0	3	4.29	0.00013043	1	1	1	1	0	1	3.01	2.574e-05	1	1	1	1	0	1	1.46	3.417e-05	X	X	X	X
3	0.021978	1	0.005736	3	0	0	1.79769e+308	1	NP_477375.1	NP_477375.1	eukaryotic translation elongation factor 1 alpha 1, isoform A [Drosophila melanogaster]	CG8280	Ef1alpha48D	7	976	976	7	0	976	24.84	0.0219784	8	62	62	8	0	62	31.53	0.00638094	13	110	110	13	0	110	51.19	0.00670253	11	51	51	11	0	51	37.37	0.00412563	X	X	X	X
4	0.008705	1	0.008688	3	0	0	1.79769e+308	1	NP_573163.1	NP_573163.1	Rrp45, isoform A [Drosophila melanogaster]	CG9606	Rrp45	7	344	344	7	0	344	28.16	0.00870541	6	25	25	6	0	25	16.75	0.00289146	11	126	126	11	0	126	43.69	0.00862781	10	160	160	10	0	160	43.93	0.0145453	X	X	X	X
5	0.006775	1	0.009305	3	0	0	1.79769e+308	1	NP_731377.1	NP_731377.1	karyopherin alpha3, isoform A [Drosophila melanogaster]	CG9423	Kap-alpha3	10	334	334	10	0	334	40.27	0.00677503	11	103	103	11	0	103	43.19	0.00954878	13	174	174	13	0	174	46.3	0.00955022	14	121	121	14	0	121	48.05	0.00881705	X	X	X	X
6	0.006381	1	0.005071	3	0	0	1.79769e+308	1	NP_511109.1	NP_511109.1	stress-sensitive B, isoform A [Drosophila melanogaster]	CG16944	sesB	9	183	183	9	0	183	32.78	0.00638128	7	22	22	7	0	22	31.44	0.00350611	10	67	67	10	0	67	40.13	0.00632165	11	43	43	11	0	43	42.47	0.0053864	X	X	X	X
7	0.005917	1	0.010472	3	0	0	1.79769e+308	1	NP_649157.1	NP_649157.1	Mtr3 [Drosophila melanogaster]	CG8025	Mtr3	14	185	185	14	0	185	50.31	0.00591673	12	62	62	12	0	62	36.5	0.0090625	13	99	99	13	0	99	48.77	0.00856732	20	120	120	20	0	120	55.83	0.0137868	X	X	X	X
8	0.00552	1	0.005329	3	0	0	1.79769e+308	2	NP_001245533.1;NP_511049.1	NP_001245533.1	myosin light chain cytoplasmic, isoform B [Drosophila melanogaster]	CG3201	Mlc-c	6	81	81	6	0	81	56.21	0.00551978	7	34	34	7	0	34	67.97	0.0105892	5	16	16	5	0	16	49.02	0.00295023	5	10	10	5	0	10	39.87	0.00244799	X	X	X	X
9	0.004134	1	0.003168	3	0	0	1.79769e+308	1	NP_524243.2	NP_524243.2	Rm62, isoform A [Drosophila melanogaster]	CG10279	Rm62	22	286	271	19	15	285.087	40.19	0.00413405	26	120	108	22	12	119.32	45.9	0.00790785	13	35	31	11	4	33.7753	31.15	0.00132525	4	7	3	2	4	5.19355	7.37	0.00027054	X	X	X	X
10	0.00368	1	0.018769	3	0	0	1.79769e+308	1	NP_609492.1	NP_609492.1	Csl4 [Drosophila melanogaster]	CG6249	Csl4	9	72	72	9	0	72	64.22	0.00367985	6	20	20	6	0	20	28.92	0.00467169	9	153	153	9	0	153	50.49	0.0211587	10	166	166	10	0	166	68.14	0.0304775	X	X	X	X
11	0.003221	1	0.005137	3	0	0	1.79769e+308	1	NP_524356.1	NP_524356.1	heat shock protein cognate 4, isoform A [Drosophila melanogaster]	CG4264	Hsc70-4	25	212	144	20	68	201.124	54.22	0.00322115	21	81	77	19	4	79.756	37.33	0.0058379	26	95	85	22	10	92.8878	56.22	0.00402536	28	101	85	23	16	96.4491	54.07	0.00554905	X	X	X	X
14	0.002192	1	0.00162	3	0	0	1.79769e+308	2	NP_001189238.1;NP_524383.3	NP_001189238.1	cheerio, isoform I [Drosophila melanogaster]	CG3937	cher	64	471	471	64	0	471	43.62	0.0021923	62	197	197	62	0	197	40.4	0.00419075	9	20	20	9	0	20	5.8	0.00025189	12	25	25	12	0	25	9.02	0.00041802	X	X	X	X
15	0.002169	1	0.003336	3	0	0	1.79769e+308	1	NP_523710.1	NP_523710.1	calmodulin, isoform A [Drosophila melanogaster]	CG8472	Cam	6	31	31	6	0	31	67.11	0.00216922	5	12	12	5	0	12	39.6	0.00383768	5	14	14	5	0	14	67.79	0.00265075	6	14	14	6	0	14	72.48	0.00351919	X	X	X	X
16	0.002133	1	0.00131	3	0	0	1.79769e+308	1	NP_648905.1	NP_648905.1	Ubiquinol-cytochrome c reductase core protein 2, isoform A [Drosophila melanogaster]	CG4169	UQCR-C2	11	90	90	11	0	90	40.45	0.00213264	5	16	16	5	0	16	21.36	0.00173277	5	21	21	5	0	21	22.05	0.00134646	4	10	10	4	0	10	17.05	0.00085123	X	X	X	X
17	0.002039	1	0.002394	3	0	0	1.79769e+308	3	NP_001188871.1;NP_001188872.1;NP_610253.1	NP_001188871.1	uncharacterized protein CG17002, isoform C [Drosophila melanogaster]	CG17002	CG17002	11	79	79	11	0	79	42.33	0.0020388	2	5	5	2	0	5	9.65	0.00058974	5	32	32	5	0	32	29.95	0.00223458	11	47	47	11	0	47	45.79	0.0043573	X	X	X	X
18	0.002011	1	0.002369	3	0	0	1.79769e+308	1	NP_647859.1	NP_647859.1	activated Cdc42 kinase [Drosophila melanogaster]	CG14992	Ack	24	207	207	24	0	207	35.23	0.0020114	28	86	86	28	0	86	36.25	0.0038192	26	72	72	26	0	72	38.02	0.00189304	16	40	40	16	0	40	25.16	0.00139624	X	X	X	X
19	0.001919	1	0.005594	3	0	0	1.79769e+308	1	NP_722609.2	NP_722609.2	uncharacterized protein CG31974, isoform B [Drosophila melanogaster]	CG31974	CG31974	12	76	76	12	0	76	29.54	0.00191863	7	49	49	7	0	49	23.49	0.00565353	12	62	62	12	0	62	51.57	0.00423515	18	76	76	18	0	76	52.3	0.00689231	X	X	X	X
20	0.001885	1	0.00178	3	0	0	1.79769e+308	1	NP_608960.2	NP_608960.2	uncharacterized protein CG7239 [Drosophila melanogaster]	CG7239	CG7239	8	83	83	8	0	83	23.09	0.00188536	5	17	17	5	0	17	18.08	0.00176486	5	25	25	5	0	25	17.21	0.00153658	8	25	25	8	0	25	26.36	0.00203999	X	X	X	X
21	0.001786	1	0.004125	3	0	0	1.79769e+308	1	NP_611539.1	NP_611539.1	capping protein alpha [Drosophila melanogaster]	CG10540	cpa	6	49	49	6	0	49	32.17	0.00178631	3	28	28	3	0	28	21.33	0.00466515	9	37	37	9	0	37	52.8	0.00364975	7	31	31	7	0	31	39.86	0.00405973	X	X	X	X
22	0.001673	1	0.004828	3	0	0	1.79769e+308	1	NP_523609.3	NP_523609.3	M-phase phosphoprotein 6, isoform A [Drosophila melanogaster]	CG9250	Mpp6	6	26	26	6	0	26	41.98	0.00167335	4	12	12	4	0	12	29.63	0.00352972	2	39	39	2	0	39	25.31	0.00679167	6	18	18	6	0	18	45.68	0.00416158	X	X	X	X
23	0.001669	1	0.002132	3	0	0	1.79769e+308	1	NP_476807.1	NP_476807.1	heterogeneous nuclear ribonucleoprotein at 87F, isoform A [Drosophila melanogaster]	CG12749	Hrb87F	6	63	57	5	6	61.6216	28.83	0.00166878	9	45	34	6	11	41.48	23.38	0.00513395	6	12	6	3	6	9.27273	20	0.00067948	4	6	2	2	4	6	12.47	0.0005837	X	X	X	X
24	0.001613	1	0.001837	3	0	0	1.79769e+308	1	NP_729824.2	NP_729824.2	uncharacterized protein CG10984, isoform C [Drosophila melanogaster]	CG10984	CG10984	14	99	99	14	0	99	33.44	0.00161281	13	25	25	13	0	25	32.03	0.00186138	11	31	31	11	0	31	33.44	0.0013665	17	39	39	17	0	39	43.75	0.00228237	X	X	X	X
25	0.001463	1	0.003235	3	0	0	1.79769e+308	1	NP_573077.2	NP_573077.2	uncharacterized protein CG15602, isoform A [Drosophila melanogaster]	CG15602	CG15602	9	48	48	9	0	48	37.72	0.00146333	7	23	23	7	0	23	29.53	0.00320461	10	31	31	10	0	31	41.52	0.00255719	10	36	36	10	0	36	38.01	0.00394255	X	X	X	X
26	0.001428	1	0.001417	3	0	0	1.79769e+308	1	NP_651978.2	NP_651978.2	histone deacetylase 3 [Drosophila melanogaster]	CG2128	HDAC3	6	60	60	6	0	60	25.11	0.00142825	3	6	6	3	0	6	12.1	0.00065276	8	24	24	8	0	24	28.31	0.00154584	11	24	24	11	0	24	42.24	0.00205229	X	X	X	X
27	0.001398	1	0.002815	3	0	0	1.79769e+308	1	NP_477005.1	NP_477005.1	capping protein beta, isoform A [Drosophila melanogaster]	CG17158	cpb	6	37	37	6	0	37	29.35	0.00139772	3	18	18	3	0	18	15.94	0.00310769	5	23	23	5	0	23	28.26	0.00235096	7	22	22	7	0	22	33.7	0.00298548	X	X	X	X
28	0.001354	1	0.004564	3	0	0	1.79769e+308	1	NP_727563.1	NP_727563.1	heat shock 70-kDa protein cognate 3, isoform A [Drosophila melanogaster]	CG4147	Hsc70-3	17	100	75	13	25	85.188	33.54	0.00135395	18	87	85	17	2	85.9942	32.77	0.00624653	14	47	41	11	6	42.8753	31.55	0.00184387	21	102	94	18	8	98.1115	43.6	0.00560167	X	X	X	X
30	0.001258	1	0.001601	3	0	0	1.79769e+308	2	NP_001260107.1;NP_608959.1	NP_001260107.1	uncharacterized protein CG14005, isoform B [Drosophila melanogaster]	CG14005	CG14005	4	38	38	4	0	38	19.05	0.00125777	5	15	15	5	0	15	27.62	0.00226911	7	19	19	7	0	19	37.78	0.00170165	5	7	7	5	0	7	35.24	0.00083232	X	X	X	X
31	0.001191	1	0.00074	3	0	0	1.79769e+308	1	NP_733041.2	NP_733041.2	scaffold attachment factor B, isoform B [Drosophila melanogaster]	CG6995	Saf-B	15	106	106	15	0	106	22.41	0.00119093	14	31	31	14	0	31	18.21	0.0015918	6	18	18	6	0	18	8.73	0.00054721	1	2	2	1	0	2	1.72	8.072e-05	X	X	X	X
32	0.001137	1	0.001783	3	0	0	1.79769e+308	1	NP_609307.1	NP_609307.1	uncharacterized protein CG13117, isoform A [Drosophila melanogaster]	CG13117	CG13117	2	12	12	2	0	12	28.18	0.00113741	2	9	9	2	0	9	30.91	0.00389874	1	3	3	1	0	3	18.18	0.00076941	1	2	2	1	0	2	12.73	0.00068099	X	X	X	X
33	0.001024	1	0.000807	3	0	0	1.79769e+308	1	NP_524918.1	NP_524918.1	casein kinase IIalpha, isoform B [Drosophila melanogaster]	CG17520	CkIIalpha	5	33	33	5	0	33	20.24	0.00102401	4	8	8	4	0	8	20.83	0.00113455	7	14	14	7	0	14	36.61	0.00117548	1	1	1	1	0	1	4.46	0.00011147	X	X	X	X
34	0.001014	1	0.000526	3	0	0	1.79769e+308	1	NP_524865.2	NP_524865.2	gelsolin, isoform B [Drosophila melanogaster]	CG1106	Gel	17	96	4	1	92	77.6	27.19	0.00101388	14	37	2	1	35	25.3333	24.19	0.00151274	1	1	0	0	1	0.5	1	1.768e-05	1	2	0	0	2	1	2.01	4.694e-05	X	X	X	X
35	0.000977	1	0.001474	3	0	0	1.79769e+308	1	NP_610610.1	NP_610610.1	uncharacterized protein CG7637 [Drosophila melanogaster]	CG7637	CG7637	1	6	6	1	0	6	20.31	0.00097746	1	2	2	1	0	2	20.31	0.0014891	2	4	4	2	0	4	42.19	0.00176322	1	2	2	1	0	2	21.88	0.00117045	X	X	X	X
36	0.000943	1	0.001441	3	0	0	1.79769e+308	1	NP_652000.1	NP_652000.1	eukaryotic translation elongation factor 1 gamma, isoform A [Drosophila melanogaster]	CG11901	Ef1gamma	5	39	39	5	0	39	20.65	0.00094344	2	3	3	2	0	3	11.14	0.00033168	13	53	53	13	0	53	38.52	0.00346917	3	6	6	3	0	6	13.69	0.00052141	X	X	X	X
37	0.000904	1	0.001336	3	0	0	1.79769e+308	2	NP_001286608.1;NP_523791.2	NP_001286608.1	coracle, isoform G [Drosophila melanogaster]	CG11949	cora	26	147	147	26	0	147	26.3	0.00090369	18	44	44	18	0	44	16.86	0.00123623	28	63	63	28	0	63	26.89	0.00104795	36	78	78	36	0	78	32.72	0.00172254	X	X	X	X
39	0.000886	1	0.001447	3	0	0	1.79769e+308	2	NP_001261287.1;NP_476739.1	NP_001261287.1	alpha spectrin, isoform C [Drosophila melanogaster]	CG1977	alpha-Spec	35	208	208	35	0	208	22.15	0.00088625	48	127	127	48	0	127	28.48	0.00247311	35	81	81	35	0	81	23.05	0.00093385	29	61	61	29	0	61	18.51	0.00093368	X	X	X	X
40	0.000876	1	0.002705	3	0	0	1.79769e+308	2	NP_001163075.1;NP_610316.3	NP_001163075.1	Leucine-rich repeat, isoform C [Drosophila melanogaster]	CG1399	LRR	19	120	120	19	0	120	18.54	0.00087554	17	44	44	17	0	44	17.14	0.00146722	26	103	103	26	0	103	25.75	0.00203344	40	176	176	40	0	176	41.78	0.00461298	X	X	X	X
41	0.000798	1	0.002761	3	0	0	1.79769e+308	1	NP_608326.1	NP_608326.1	uncharacterized protein CG14207, isoform A [Drosophila melanogaster]	CG14207	CG14207	5	14	14	5	0	14	50.82	0.00079764	3	20	20	3	0	20	29.51	0.00520778	4	8	8	4	0	8	40.98	0.00123329	4	9	9	4	0	9	30.6	0.00184201	X	X	X	X
42	0.000771	1	0.001863	3	0	0	1.79769e+308	1	NP_650723.1	NP_650723.1	uncharacterized protein CG12333 [Drosophila melanogaster]	CG12333	CG12333	8	36	36	8	0	36	25.46	0.00077073	4	15	15	4	0	15	12.11	0.0014677	9	26	26	9	0	26	29.98	0.00150616	9	34	34	9	0	34	32.65	0.00261488	X	X	X	X
43	0.000751	1	0.002508	3	0	0	1.79769e+308	1	NP_477323.1	NP_477323.1	dynamin associated protein 160, isoform B [Drosophila melanogaster]	CG1099	Dap160	13	73	73	13	0	73	20.61	0.00075061	10	40	40	10	0	40	17.36	0.00187973	22	98	98	22	0	98	31.76	0.00272656	26	79	79	26	0	79	36.79	0.00291803	X	X	X	X
44	0.000745	1	0.003752	3	0	0	1.79769e+308	3	NP_652209.1;NP_731825.1;NP_731826.1	NP_652209.1	squid, isoform C [Drosophila melanogaster]	CG16901	sqd	4	22	22	4	0	22	19.16	0.00074473	5	30	30	5	0	30	24.35	0.00464135	9	47	47	9	0	47	33.77	0.00430501	7	19	19	7	0	19	33.12	0.00231049	X	X	X	X
45	0.000741	1	0.001372	3	0	0	1.79769e+308	3	NP_001261983.1;NP_001287092.1;NP_648972.2	NP_001261983.1	uncharacterized protein CG7692, isoform B [Drosophila melanogaster]	CG7692	CG7692	15	94	94	15	0	94	18.37	0.00074079	17	51	51	17	0	51	20.56	0.00183689	19	63	63	19	0	63	23.28	0.00134341	17	33	33	17	0	33	23.05	0.00093423	X	X	X	X
46	0.000723	1	0.001245	3	0	0	1.79769e+308	1	NP_609946.1	NP_609946.1	lethal (2) 37Cb [Drosophila melanogaster]	CG10689	l(2)37Cb	18	62	62	18	0	62	25.84	0.00072307	11	50	50	11	0	50	16.89	0.00266506	11	22	22	11	0	22	17.34	0.00069424	5	9	9	5	0	9	6.82	0.00037706	X	X	X	X
47	0.000701	1	0.001181	3	0	0	1.79769e+308	1	NP_536797.3	NP_536797.3	smrter, isoform D [Drosophila melanogaster]	CG4013	Smr	39	242	242	39	0	242	18.22	0.00070068	35	104	104	35	0	104	15.86	0.00137621	33	92	92	33	0	92	16.66	0.00072076	53	139	139	53	0	139	23.24	0.00144575	X	X	X	X
48	0.00069	1	0.001691	3	0	0	1.79769e+308	1	NP_724345.1	NP_724345.1	histone H3 [Drosophila melanogaster]	CG31613	His3:CG31613	2	9	8	1	1	9	28.68	0.00068997	1	6	6	1	0	6	23.53	0.00210226	1	13	13	1	0	13	23.53	0.00269669	1	1	1	1	0	1	23.53	0.0002754	X	X	X	X
49	0.000658	1	0.001075	3	0	0	1.79769e+308	1	NP_476667.1	NP_476667.1	poly(A) binding protein, isoform A [Drosophila melanogaster]	CG5119	pAbp	7	40	40	7	0	40	18.93	0.00065781	7	25	25	7	0	25	21.29	0.00187899	5	9	9	5	0	9	15.14	0.00040048	10	16	16	10	0	16	23.66	0.00094522	X	X	X	X
50	0.000632	1	0.000994	3	0	0	1.79769e+308	1	NP_611739.1	NP_611739.1	CCHC-type zinc finger nucleic acid binding protein, isoform A [Drosophila melanogaster]	CG3800	CG3800	3	10	10	3	0	10	27.88	0.00063189	2	6	6	2	0	6	20.61	0.00173277	1	2	2	1	0	2	5.45	0.00034196	2	4	4	2	0	4	20.61	0.00090798	X	X	X	X
51	0.000614	1	0.001028	3	0	0	1.79769e+308	1	NP_650571.2	NP_650571.2	uncharacterized protein CG10324 [Drosophila melanogaster]	CG10324	CG10324	8	32	32	8	0	32	28.18	0.00061444	10	18	18	10	0	18	30.76	0.0015796	10	21	21	10	0	21	27.99	0.00109105	4	6	6	4	0	6	16.76	0.00041386	X	X	X	X
52	0.000597	1	0.000603	3	0	0	1.79769e+308	3	NP_001014747.1;NP_523367.2;NP_727962.1	NP_001014747.1	no on or off transient A, isoform C [Drosophila melanogaster]	CG4211	nonA	13	40	40	13	0	40	34.24	0.00059749	9	19	19	9	0	19	18.91	0.0012971	3	6	6	3	0	6	6.02	0.00024251	3	5	5	3	0	5	7.59	0.0002683	X	X	X	X
53	0.000594	1	0.001113	3	0	0	1.79769e+308	1	NP_476869.1	NP_476869.1	heterogeneous nuclear ribonucleoprotein at 27C, isoform A [Drosophila melanogaster]	CG10377	Hrb27C	6	24	24	6	0	24	25.18	0.00059437	4	10	10	4	0	10	16.63	0.00113186	6	17	17	6	0	17	27.08	0.00113918	5	12	12	5	0	12	24.47	0.00106758	X	X	X	X
54	0.000585	1	0.001188	3	0	0	1.79769e+308	3	NP_476934.2;NP_728594.2;NP_728595.1	NP_476934.2	myosin 61F, isoform D [Drosophila melanogaster]	CG9155	Myo61F	15	59	59	15	0	59	18.25	0.00058474	14	42	42	14	0	42	17.02	0.00190242	14	42	42	14	0	42	20.91	0.00112632	8	15	15	8	0	15	11.88	0.00053404	X	X	X	X
55	0.000565	1	0.000702	3	0	0	1.79769e+308	1	NP_610910.1	NP_610910.1	uncharacterized protein CG6543, isoform A [Drosophila melanogaster]	CG6543	CG6543	5	16	16	5	0	16	24.07	0.00056549	1	2	2	1	0	2	4.41	0.00032306	9	16	16	9	0	16	49.49	0.00153012	1	2	2	1	0	2	4.41	0.00025393	X	X	X	X
57	0.000548	1	0.000482	3	0	0	1.79769e+308	1	NP_609034.1	NP_609034.1	Sec61 alpha subunit, isoform A [Drosophila melanogaster]	CG9539	Sec61alpha	1	25	25	1	0	25	5.25	0.0005476	1	5	5	1	0	5	5.25	0.00050054	2	8	8	2	0	8	9.45	0.00047414	2	6	6	2	0	6	9.45	0.00047211	X	X	X	X
58	0.000546	1	0.001153	3	0	0	1.79769e+308	1	NP_523817.1	NP_523817.1	fibrillarin [Drosophila melanogaster]	CG9888	Fib	4	18	18	4	0	18	18.6	0.00054556	4	9	9	4	0	9	19.77	0.00124669	6	19	19	6	0	19	28.49	0.0015582	2	6	6	2	0	6	9.59	0.00065327	X	X	X	X
59	0.00054	1	0.001738	3	0	0	1.79769e+308	1	NP_001262379.1	NP_001262379.1	belle, isoform B [Drosophila melanogaster]	CG9748	bel	13	45	41	12	4	41.5031	20.85	0.00054023	12	44	42	11	2	42.549	20.47	0.00253123	14	39	37	13	2	38	23.85	0.00133838	11	29	27	10	2	28.7419	16.35	0.00134395	X	X	X	X
60	0.000536	1	0.001752	3	0	0	1.79769e+308	1	NP_523538.1	NP_523538.1	myosin 31DF, isoform A [Drosophila melanogaster]	CG7438	Myo31DF	18	52	52	18	0	52	23.54	0.00053627	10	31	31	10	0	31	12.56	0.00146112	24	63	63	24	0	63	33.43	0.00175799	24	55	55	24	0	55	33.63	0.00203757	X	X	X	X
61	0.000531	1	0.000586	3	0	0	1.79769e+308	1	NP_649527.1	NP_649527.1	uncharacterized protein CG11999 [Drosophila melanogaster]	CG11999	CG11999	3	11	11	3	0	11	15.74	0.00053097	2	6	6	2	0	6	11.57	0.00132364	2	2	2	2	0	2	11.57	0.00026122	1	1	1	1	0	1	6.02	0.0001734	X	X	X	X
62	0.000501	1	0.001718	3	0	0	1.79769e+308	1	NP_608375.1	NP_608375.1	uncharacterized protein CG9577 [Drosophila melanogaster]	CG9577	CG9577	3	15	15	3	0	15	16.03	0.00050126	1	1	1	1	0	1	3.53	0.00015273	9	50	50	9	0	50	50.32	0.00452108	2	4	4	2	0	4	12.82	0.00048018	X	X	X	X
63	0.000477	1	0.003737	3	0	0	1.79769e+308	2	NP_001261398.1;NP_647860.1	NP_001261398.1	Chd64, isoform C [Drosophila melanogaster]	CG14996	Chd64	4	8	8	4	0	8	29.71	0.00047663	5	10	10	5	0	10	45.14	0.00272293	9	50	50	9	0	50	57.14	0.00806045	1	2	2	1	0	2	12	0.00042805	X	X	X	X
64	0.000477	1	0.002107	3	0	0	1.79769e+308	1	NP_001286835.1	NP_001286835.1	beta-Tubulin at 60D, isoform B [Drosophila melanogaster]	CG3401	betaTub60D	9	64	19	3	45	20.7449	23.4	0.00047746	9	33	14	4	19	17.0575	32.45	0.00179428	13	60	36	6	24	38.3934	40.62	0.00239103	14	46	22	7	24	25.8261	39.51	0.00213531	1	2	0	0
65	0.000461	1	0.000425	3	0	0	1.79769e+308	2	NP_001259455.1;NP_727547.1	NP_001259455.1	bifocal, isoform D [Drosophila melanogaster]	CG1822	bif	9	52	52	9	0	52	17.93	0.00046063	10	23	23	10	0	23	20.65	0.00093116	4	5	5	4	0	5	7.65	0.00011985	5	7	7	5	0	7	11.72	0.00022275	X	X	X	X
66	0.000456	1	0.001316	3	0	0	1.79769e+308	1	NP_523741.2	NP_523741.2	heat shock protein cognate 5, isoform A [Drosophila melanogaster]	CG8542	Hsc70-5	7	30	30	7	0	30	13.99	0.00045596	7	21	21	7	0	21	12.24	0.00145871	6	26	26	6	0	26	14.87	0.00106924	9	26	26	9	0	26	19.53	0.00141955	X	X	X	X
67	0.000444	1	0.000804	3	0	0	1.79769e+308	1	NP_609162.1	NP_609162.1	small ribonucleoprotein particle protein SmE [Drosophila melanogaster]	CG18591	SmE	1	4	4	1	0	4	11.7	0.00044367	1	2	2	1	0	2	11.7	0.00101386	1	2	2	1	0	2	11.7	0.00060025	1	2	2	1	0	2	11.7	0.0007969	X	X	X	X
68	0.000441	1	0.000608	3	0	0	1.79769e+308	1	NP_524000.1	NP_524000.1	heat shock protein 27, isoform A [Drosophila melanogaster]	CG4466	Hsp27	3	9	9	3	0	9	18.78	0.00044055	2	5	5	2	0	5	14.55	0.00111857	3	4	4	3	0	4	21.6	0.00052979	1	1	1	1	0	1	5.16	0.00017584	X	X	X	X
69	0.00044	1	0.000487	3	0	0	1.79769e+308	2	NP_001096852.1;NP_524640.3	NP_001096852.1	eukaryotic translation initiation factor 4G1, isoform B [Drosophila melanogaster]	CG10811	eIF4G	15	81	81	15	0	81	13.44	0.00044009	10	21	21	10	0	21	8.6	0.00052146	16	28	28	16	0	28	12.66	0.00041163	16	27	27	16	0	27	14.02	0.00052698	X	X	X	X
71	0.000423	1	0.001784	3	0	0	1.79769e+308	1	NP_477034.1	NP_477034.1	twinstar [Drosophila melanogaster]	CG4254	tsr	3	6	6	3	0	6	25	0.00042269	3	5	5	3	0	5	30.41	0.00160984	5	13	13	5	0	13	39.19	0.00247804	3	5	5	3	0	5	25	0.00126535	X	X	X	X
72	0.000423	1	0.001001	3	0	0	1.79769e+308	2	NP_001097492.2;NP_001261367.1	NP_001097492.2	karst, isoform E [Drosophila melanogaster]	CG12008	kst	48	176	176	48	0	176	17.11	0.00042311	48	111	111	48	0	111	15.82	0.00121957	62	131	131	62	0	131	22	0.00085214	55	108	108	55	0	108	19.48	0.00093269	X	X	X	X
73	0.000419	1	0.001283	3	0	0	1.79769e+308	1	NP_511057.1	NP_511057.1	spaghetti squash, isoform A [Drosophila melanogaster]	CG3595	sqh	1	7	7	1	0	7	10.34	0.00041945	3	5	5	3	0	5	27.01	0.00136929	3	6	6	3	0	6	27.01	0.00097281	3	7	7	3	0	7	33.91	0.00150678	X	X	X	X
74	0.000417	1	0.000693	3	0	0	1.79769e+308	3	NP_609090.2;NP_723234.2;NP_723235.2	NP_609090.2	septin interacting protein 2, isoform A [Drosophila melanogaster]	CG9188	sip2	6	25	25	6	0	25	13.6	0.00041705	2	6	6	2	0	6	5.6	0.00045745	7	12	12	7	0	12	23.84	0.00054166	8	18	18	8	0	18	22.88	0.00107868	X	X	X	X
75	0.000417	1	0.000177	3	0	0	1.79769e+308	1	NP_609589.1	NP_609589.1	uncharacterized protein CG5787, isoform A [Drosophila melanogaster]	CG5787	CG5787	5	38	38	5	0	38	12.74	0.00041705	4	8	8	4	0	8	9.16	0.00040127	2	3	3	2	0	3	4.95	8.909e-05	1	1	1	1	0	1	2	3.943e-05	X	X	X	X
76	0.000409	1	0.000552	3	0	0	1.79769e+308	1	NP_609842.1	NP_609842.1	small glutamine-rich tetratricopeptide containing protein, isoform A [Drosophila melanogaster]	CG5094	Sgt	1	13	13	1	0	13	8.16	0.00040949	2	6	6	2	0	6	12.69	0.00086377	2	4	4	2	0	4	12.69	0.00034093	2	4	4	2	0	4	12.69	0.00045262	X	X	X	X
77	0.000405	1	0.000312	3	0	0	1.79769e+308	1	NP_001262523.1	NP_001262523.1	C-terminal binding protein, isoform I [Drosophila melanogaster]	CG7583	CtBP	5	22	6	1	16	14.7273	19.53	0.00040515	2	9	0	0	9	4.5	7.92	0.00056578	3	6	0	0	6	3	10.82	0.00022331	2	3	0	0	3	1.5	8.44	0.00014824	X	X	X	X
78	0.000402	1	0.001375	3	0	0	1.79769e+308	1	NP_651388.1	NP_651388.1	uncharacterized protein CG10669, isoform A [Drosophila melanogaster]	CG10669	CG10669	5	36	36	5	0	36	8.25	0.0004023	10	25	25	10	0	25	16.4	0.00127683	19	57	57	19	0	57	27.22	0.00172354	11	28	28	11	0	28	16.51	0.00112403	X	X	X	X
79	0.0004	1	0.000651	3	0	0	1.79769e+308	3	NP_001247017.1;NP_731443.1;NP_731445.1	NP_001247017.1	Fmr1, isoform G [Drosophila melanogaster]	CG6203	Fmr1	7	28	28	7	0	28	21.54	0.00040046	9	21	21	9	0	21	22.5	0.00137267	2	11	11	2	0	11	5.35	0.00042569	2	3	3	2	0	3	5.35	0.00015413	X	X	X	X
80	0.000397	1	0.000816	3	0	0	1.79769e+308	8	NP_001261770.1;NP_001261771.1;NP_001261772.1;NP_001261773.1;NP_001261774.1;NP_001261775.1;NP_001261776.1;NP_648585.3	NP_001261770.1	trailer hitch, isoform C [Drosophila melanogaster]	CG10686	tral	7	25	25	7	0	25	21.34	0.00039734	7	27	27	7	0	27	18.29	0.00196125	5	6	6	5	0	6	16.46	0.00025803	2	4	4	2	0	4	6.1	0.00022838	X	X	X	X
81	0.000388	1	0.000758	3	0	0	1.79769e+308	1	NP_524679.3	NP_524679.3	misshapen, isoform A [Drosophila melanogaster]	CG16973	msn	11	56	56	11	0	56	12.1	0.00038821	11	21	21	11	0	21	12.97	0.00066534	18	42	42	18	0	42	22.81	0.00078782	16	33	33	16	0	33	21.08	0.0008218	X	X	X	X
82	0.00038	1	0.000933	3	0	0	1.79769e+308	1	NP_650146.1	NP_650146.1	Spt3 [Drosophila melanogaster]	CG3169	Spt3	4	14	14	4	0	14	15.36	0.00038012	8	20	20	8	0	20	27.08	0.00248183	1	3	3	1	0	3	5.47	0.0002204	1	1	1	1	0	1	4.43	9.754e-05	X	X	X	X
83	0.000378	1	0.000837	3	0	0	1.79769e+308	1	NP_651040.3	NP_651040.3	Nop56 [Drosophila melanogaster]	CG13849	Nop56	5	18	18	5	0	18	16.33	0.00037837	5	9	9	5	0	9	17.54	0.00086464	9	17	17	9	0	17	27.42	0.00096693	4	9	9	4	0	9	12.1	0.00067961	X	X	X	X
84	0.000377	1	0.000771	3	0	0	1.79769e+308	1	NP_611084.2	NP_611084.2	uncharacterized protein CG8414 [Drosophila melanogaster]	CG8414	CG8414	10	36	36	10	0	36	15.88	0.00037723	8	26	26	8	0	26	14.27	0.00124516	16	31	31	16	0	31	23.42	0.00087895	4	5	5	4	0	5	6.73	0.00018821	X	X	X	X
85	0.000374	1	0.000697	3	0	0	1.79769e+308	1	NP_649874.1	NP_649874.1	insulator binding factor 2 [Drosophila melanogaster]	CG9740	Ibf2	1	7	7	1	0	7	12.82	0.00037428	1	6	6	1	0	6	12.82	0.00146619	1	3	3	1	0	3	12.82	0.00043402	1	1	1	1	0	1	12.82	0.00019207	X	X	X	X
86	0.000372	1	0.000361	3	0	0	1.79769e+308	1	NP_476651.1	NP_476651.1	non-claret disjunctional, isoform A [Drosophila melanogaster]	CG7831	ncd	6	25	25	6	0	25	13.14	0.00037237	6	8	8	6	0	8	12.14	0.00054459	4	12	12	4	0	12	7.29	0.00048363	1	1	1	1	0	1	2.71	5.351e-05	X	X	X	X
87	0.000365	1	0.000331	3	0	0	1.79769e+308	2	NP_569908.1;NP_996326.1	NP_569908.1	sister-of-Sex-lethal, isoform D [Drosophila melanogaster]	CG3056	ssx	3	17	17	3	0	17	8.66	0.00036546	2	5	5	2	0	5	5.98	0.00049125	1	2	2	1	0	2	2.27	0.00011634	2	5	5	2	0	5	5.98	0.00038613	X	X	X	X
89	0.000358	1	0.001723	3	0	0	1.79769e+308	4	NP_732309.1;NP_732310.1;NP_732311.1;NP_732312.1	NP_732309.1	14-3-3epsilon, isoform A [Drosophila melanogaster]	CG31196	14-3-3epsilon	3	9	9	3	0	9	16.03	0.00035815	3	16	16	3	0	16	15.65	0.00291	5	17	17	5	0	17	29.77	0.00183052	3	3	3	3	0	3	15.65	0.00042887	X	X	X	X
90	0.000353	1	0.000893	3	0	0	1.79769e+308	1	NP_608525.1	NP_608525.1	shriveled [Drosophila melanogaster]	CG4164	CG4164	4	12	12	4	0	12	19.21	0.00035343	7	14	14	7	0	14	35.31	0.00188451	1	2	2	1	0	2	9.32	0.00015939	3	6	6	3	0	6	19.21	0.00063482	X	X	X	X
92	0.000351	1	0.000621	3	0	0	1.79769e+308	1	NP_609930.4	NP_609930.4	uncharacterized protein CG31793, isoform A [Drosophila melanogaster]	CG31793	CG31793	8	44	44	8	0	44	10.41	0.000351	9	18	18	9	0	18	12.01	0.00065625	13	24	24	13	0	24	19.13	0.00051804	15	24	24	15	0	24	19.36	0.00068776	X	X	X	X
93	0.000349	1	0.001013	3	0	0	1.79769e+308	2	NP_570087.1;NP_996348.1	NP_570087.1	VAMP-associated protein 33kDa, isoform B [Drosophila melanogaster]	CG5014	Vap-33A	3	9	9	3	0	9	14.87	0.00034883	4	14	14	4	0	14	20.82	0.00247999	2	4	4	2	0	4	13.75	0.0004195	1	1	1	1	0	1	7.81	0.00013924	X	X	X	X
94	0.000334	1	0.000309	3	0	0	1.79769e+308	1	NP_001262520.1	NP_001262520.1	C-terminal binding protein, isoform F [Drosophila melanogaster]	CG7583	CtBP	5	21	5	1	16	12.2727	18.02	0.0003341	2	9	0	0	9	4.5	7.83	0.00055987	3	6	0	0	6	3	10.7	0.00022098	2	3	0	0	3	1.5	8.36	0.00014669	X	X	X	X
95	0.000329	1	0.000347	3	0	0	1.79769e+308	1	NP_650595.1	NP_650595.1	kugelkern, isoform A [Drosophila melanogaster]	CG5175	kuk	2	18	18	2	0	18	5.96	0.00032925	2	3	3	2	0	3	8.95	0.0002508	3	4	4	3	0	4	8.42	0.00019798	3	9	9	3	0	9	11.05	0.00059138	X	X	X	X
96	0.000323	1	0.000504	3	0	0	1.79769e+308	1	NP_728546.1	NP_728546.1	splicing factor 3b subunit 3, isoform A [Drosophila melanogaster]	CG13900	CG13900	10	38	38	10	0	38	13.85	0.0003229	10	24	24	10	0	24	11.98	0.00093205	5	8	8	5	0	8	7.5	0.00018394	6	13	13	6	0	13	7.17	0.00039683	X	X	X	X
97	0.000321	1	0.000423	3	0	0	1.79769e+308	1	NP_524474.1	NP_524474.1	heat shock protein 68 [Drosophila melanogaster]	CG5436	Hsp68	4	24	19	2	5	19.5435	10.39	0.00032089	3	8	6	2	2	6.14458	6.14	0.0004611	6	13	11	5	2	11.1606	13.86	0.00049584	5	11	5	3	6	5.27628	12.13	0.00031121	X	X	X	X
98	0.000319	1	0.002923	3	0	0	1.79769e+308	1	NP_651765.1	NP_651765.1	Zinc-finger protein interacting with CP190 [Drosophila melanogaster]	CG7928	ZIPIC	5	14	14	5	0	14	14	0.0003194	8	25	25	8	0	25	26.04	0.00260674	10	56	56	10	0	56	28.88	0.003457	11	33	33	11	0	33	32.82	0.00270457	X	X	X	X
100	0.000311	1	0.001005	3	0	0	1.79769e+308	1	NP_524937.1	NP_524937.1	protein phosphatase 1 at 87B [Drosophila melanogaster]	CG5650	Pp1-87B	3	9	9	3	0	9	17.55	0.00031072	5	13	13	5	0	13	25.17	0.00205121	5	9	9	5	0	9	21.19	0.00084074	1	1	1	1	0	1	4.64	0.00012402	X	X	X	X
101	0.000306	1	0.000602	3	0	0	1.79769e+308	1	NP_610184.2	NP_610184.2	glycoprotein 210 kDa, isoform A [Drosophila melanogaster]	CG7897	Gp210	15	55	55	15	0	55	11.35	0.00030567	13	23	23	13	0	23	10.71	0.00058421	23	44	44	23	0	44	20.63	0.00066168	17	28	28	17	0	28	13.49	0.00055902	X	X	X	X
102	0.000298	1	0.000258	3	0	0	1.79769e+308	1	NP_001261400.1	NP_001261400.1	ensconsin, isoform K [Drosophila melanogaster]	CG14998	ens	7	29	29	7	0	29	13.79	0.00029789	5	8	8	5	0	8	10.44	0.00037558	4	9	9	4	0	9	7.88	0.00025015	3	4	4	3	0	4	6.5	0.0001476	X	X	X	X
103	0.00029	1	0.000524	3	0	0	1.79769e+308	1	NP_647966.1	NP_647966.1	blanks [Drosophila melanogaster]	CG10630	blanks	3	9	9	3	0	9	13.89	0.00028962	2	3	3	2	0	3	10.8	0.00044121	5	9	9	5	0	9	18.52	0.00078365	2	3	3	2	0	3	10.8	0.0003468	X	X	X	X
104	0.000285	1	0.000965	3	0	0	1.79769e+308	1	NP_650283.1	NP_650283.1	DnaJ-like-2, isoform A [Drosophila melanogaster]	CG8863	Droj2	3	11	11	3	0	11	12.9	0.00028459	5	17	17	5	0	17	17.12	0.0020101	4	10	10	4	0	10	18.61	0.00070004	2	2	2	2	0	2	7.2	0.00018588	X	X	X	X
105	0.000283	1	0.00052	3	0	0	1.79769e+308	1	NP_649297.1	NP_649297.1	putzig, isoform A [Drosophila melanogaster]	CG7752	pzg	6	27	27	6	0	27	12.15	0.00028264	6	10	10	6	0	10	10.64	0.00047843	7	13	13	7	0	13	11.24	0.00036822	12	19	19	12	0	19	16.67	0.00071449	X	X	X	X
106	0.000283	1	6.4e-05	3	0	0	1.79769e+308	3	NP_001137887.1;NP_001137888.1;NP_001137889.1	NP_001137887.1	farmer, isoform H [Drosophila melanogaster]	CG10625	CG10625	1	32	32	1	0	32	1.1	0.00028275	1	1	1	1	0	1	1.1	4.038e-05	1	1	1	1	0	1	1.1	2.391e-05	1	4	4	1	0	4	1.1	0.00012696	X	X	X	X
108	0.00028	1	0.000659	3	0	0	1.79769e+308	1	NP_523999.1	NP_523999.1	heat shock protein 23, isoform A [Drosophila melanogaster]	CG4463	Hsp23	2	5	5	2	0	5	15.59	0.00028028	1	2	2	1	0	2	7.53	0.00051238	4	7	7	4	0	7	34.41	0.00106173	1	2	2	1	0	2	8.06	0.00040273	X	X	X	X
109	0.000279	1	0.000687	3	0	0	1.79769e+308	3	NP_001163196.1;NP_001163197.1;NP_611354.2	NP_001163196.1	uncharacterized protein CG30122, isoform C [Drosophila melanogaster]	CG30122	CG30122	9	34	34	9	0	34	9.98	0.00027869	18	43	43	18	0	43	18.47	0.00161085	8	15	15	8	0	15	10.93	0.00033268	2	4	4	2	0	4	2.75	0.00011778	X	X	X	X
110	0.000277	1	0.000632	3	0	0	1.79769e+308	1	NP_609336.3	NP_609336.3	uncharacterized protein CG4747, isoform A [Drosophila melanogaster]	CG4747	CG4747	4	16	16	4	0	16	11.46	0.00027711	3	8	8	3	0	8	7.14	0.00063324	10	19	19	10	0	19	28.57	0.0008904	4	6	6	4	0	6	14.78	0.0003733	X	X	X	X
111	0.000273	1	0.000295	3	0	0	1.79769e+308	1	NP_730788.1	NP_730788.1	gelsolin, isoform A [Drosophila melanogaster]	CG1106	Gel	17	93	1	1	92	19.4	28.24	0.00027334	14	36	1	1	35	12.6667	25	0.00081565	1	1	0	0	1	0.5	1.08	1.906e-05	1	2	0	0	2	1	2.16	5.061e-05	X	X	X	X
112	0.000267	1	0.000243	3	0	0	1.79769e+308	1	NP_648659.2	NP_648659.2	Spt20, isoform A [Drosophila melanogaster]	CG17689	Spt20	12	48	48	12	0	48	13.35	0.0002672	10	18	18	10	0	18	8.92	0.00045794	4	6	6	4	0	6	3.68	9.037e-05	5	9	9	5	0	9	5.29	0.00017997	X	X	X	X
113	0.000265	1	0.000307	3	0	0	1.79769e+308	1	NP_477412.1	NP_477412.1	nop5 [Drosophila melanogaster]	CG10206	nop5	2	13	13	2	0	13	6.65	0.00026525	1	1	1	1	0	1	3.72	9.325e-05	6	11	11	6	0	11	18.98	0.00060729	1	3	3	1	0	3	2.94	0.00021989	X	X	X	X
114	0.000264	1	0.000534	3	0	0	1.79769e+308	1	NP_476818.1	NP_476818.1	Kinesin-like protein at 61F [Drosophila melanogaster]	CG9191	Klp61F	10	27	27	10	0	27	15.48	0.00026408	4	12	12	4	0	12	5.35	0.00053641	8	15	15	8	0	15	13.13	0.00039697	10	19	19	10	0	19	16.23	0.00066757	X	X	X	X
115	0.000248	1	0.000635	3	0	0	1.79769e+308	1	NP_573000.1	NP_573000.1	uncharacterized protein CG5599 [Drosophila melanogaster]	CG5599	CG5599	5	11	11	5	0	11	16.23	0.00024824	7	11	11	7	0	11	25.32	0.00113455	2	2	2	2	0	2	11.04	0.00012213	3	8	8	3	0	8	10.39	0.00064856	X	X	X	X
116	0.000248	1	0.000132	3	0	0	1.79769e+308	1	NP_477496.1	NP_477496.1	female sterile (2) ketel, isoform A [Drosophila melanogaster]	CG2637	Fs(2)Ket	6	21	21	6	0	21	11.65	0.00024768	2	4	4	2	0	4	4.52	0.00021562	2	3	3	2	0	3	4.75	9.574e-05	1	2	2	1	0	2	2.04	8.474e-05	X	X	X	X
117	0.000246	1	0.000787	3	0	0	1.79769e+308	1	NP_476664.2	NP_476664.2	otefin [Drosophila melanogaster]	CG5581	Ote	4	10	10	4	0	10	19.34	0.0002459	6	9	9	6	0	9	25.24	0.00101146	7	11	11	7	0	11	29.25	0.0007319	4	7	7	4	0	7	21.7	0.00061835	X	X	X	X
118	0.000242	1	0.000829	3	0	0	1.79769e+308	2	NP_001036282.1;NP_573183.2	NP_001036282.1	Rho GTPase activating protein at 15B, isoform B [Drosophila melanogaster]	CG4937	RhoGAP15B	10	35	35	10	0	35	12.78	0.00024167	8	17	17	8	0	17	9.34	0.00053647	15	34	34	15	0	34	17.09	0.00063523	26	53	53	26	0	53	26.95	0.00131462	X	X	X	X
119	0.000242	1	0.000599	3	0	0	1.79769e+308	1	NP_727694.1	NP_727694.1	uncharacterized protein CG15747, isoform A [Drosophila melanogaster]	CG15747	CG15747	4	9	9	4	0	9	14.47	0.00024247	1	1	1	1	0	1	3.36	0.00012313	4	11	11	4	0	11	12.4	0.00080188	3	9	9	3	0	9	9.3	0.00087103	X	X	X	X
120	0.000241	1	0.000391	3	0	0	1.79769e+308	1	NP_525097.1	NP_525097.1	flightless I [Drosophila melanogaster]	CG1484	fliI	11	29	29	11	0	29	13.14	0.00024073	10	24	24	10	0	24	12.82	0.00091053	4	9	9	4	0	9	6.05	0.00020215	1	2	2	1	0	2	1.59	5.964e-05	X	X	X	X
121	0.000238	1	0.000275	3	0	0	1.79769e+308	1	NP_611058.4	NP_611058.4	Z band alternatively spliced PDZ-motif protein 52, isoform I [Drosophila melanogaster]	CG30084	Zasp52	10	29	29	10	0	29	10.86	0.00023789	7	12	12	7	0	12	8.73	0.00044989	6	9	9	6	0	9	6.22	0.00019977	3	6	6	3	0	6	4.64	0.00017681	X	X	X	X
122	0.000234	1	0.001065	3	0	0	1.79769e+308	1	NP_525075.1	NP_525075.1	cut up, isoform A [Drosophila melanogaster]	CG6998	ctp	1	2	2	1	0	2	7.87	0.0002343	2	4	4	2	0	4	24.72	0.00214163	1	2	2	1	0	2	12.36	0.00063397	1	1	1	1	0	1	12.36	0.00042083	X	X	X	X
123	0.000227	1	0.000803	3	0	0	1.79769e+308	1	NP_536731.1	NP_536731.1	catalase [Drosophila melanogaster]	CG6871	Cat	2	11	11	2	0	11	7.11	0.00022666	4	11	11	4	0	11	15.61	0.0010359	6	10	10	6	0	10	21.74	0.00055754	5	11	11	5	0	11	18.77	0.00081422	X	X	X	X
124	0.000227	1	0.000491	3	0	0	1.79769e+308	1	NP_523533.2	NP_523533.2	maternal expression at 31B, isoform A [Drosophila melanogaster]	CG4916	me31B	3	10	10	3	0	10	8.06	0.00022715	1	1	1	1	0	1	2.18	0.00010382	7	13	13	7	0	13	25.27	0.00079902	3	7	7	3	0	7	15.03	0.0005712	X	X	X	X
125	0.000221	1	0.000684	3	0	0	1.79769e+308	1	NP_523529.1	NP_523529.1	DNA replication-related element factor, isoform A [Drosophila melanogaster]	CG5838	Dref	6	15	15	6	0	15	13.68	0.00022058	9	14	14	9	0	14	15.09	0.00094093	10	16	16	10	0	16	22.28	0.00063665	4	9	9	4	0	9	8.46	0.00047544	X	X	X	X
126	0.000213	1	0.002391	3	0	0	1.79769e+308	1	NP_572866.1	NP_572866.1	REG, isoform A [Drosophila melanogaster]	CG1591	REG	3	5	5	3	0	5	17.14	0.00021278	5	16	16	5	0	16	25.31	0.00311192	7	18	18	7	0	18	51.02	0.00207269	6	13	13	6	0	13	33.88	0.00198737	X	X	X	X
127	0.000212	1	0.00051	3	0	0	1.79769e+308	1	NP_524614.2	NP_524614.2	modulo, isoform A [Drosophila melanogaster]	CG2050	mod	2	11	11	2	0	11	6.64	0.0002116	2	3	3	2	0	3	6.64	0.00026375	6	23	23	6	0	23	17.34	0.00119717	1	1	1	1	0	1	2.95	6.91e-05	X	X	X	X
128	0.00021	1	0.000294	3	0	0	1.79769e+308	1	NP_651136.1	NP_651136.1	will decrease acetylation [Drosophila melanogaster]	CG4448	wda	5	15	15	5	0	15	9.56	0.00021049	7	10	10	7	0	10	12.38	0.00064134	1	1	1	1	0	1	1.88	3.797e-05	2	4	4	2	0	4	6.86	0.00020164	X	X	X	X
129	0.000207	1	0.000397	3	0	0	1.79769e+308	6	NP_001188776.1;NP_001260342.1;NP_001260343.1;NP_001260344.1;NP_723578.1;NP_723583.1	NP_001188776.1	CCR4-NOT transcription complex subunit 4, isoform H [Drosophila melanogaster]	CG31716	Cnot4	4	21	21	4	0	21	6.42	0.00020675	3	7	7	3	0	7	6.7	0.00031497	4	13	13	4	0	13	8.78	0.00034632	7	15	15	7	0	15	13.03	0.00053051	X	X	X	X
130	0.000205	1	0.000363	3	0	0	1.79769e+308	6	NP_001014503.1;NP_001246199.1;NP_001260795.1;NP_001303338.1;NP_610348.3;NP_724643.2	NP_001014503.1	lingerer, isoform D [Drosophila melanogaster]	CG8715	lig	5	27	27	5	0	27	5.38	0.00020473	6	11	11	6	0	11	9.67	0.00038121	4	4	4	4	0	4	5.96	8.207e-05	10	23	23	10	0	23	16.07	0.00062651	X	X	X	X
131	0.000203	1	0.000378	3	0	0	1.79769e+308	2	NP_723703.1;NP_723707.1	NP_723703.1	transcriptional adaptor 1-2 [Drosophila melanogaster]	CG31866	Ada1-2	2	6	6	2	0	6	12.01	0.00020311	2	3	3	2	0	3	11.69	0.00046414	1	2	2	1	0	2	4.87	0.00018319	2	4	4	2	0	4	11.69	0.00048642	X	X	X	X
132	0.0002	1	0.000328	3	0	0	1.79769e+308	1	NP_477378.1	NP_477378.1	thiolase [Drosophila melanogaster]	CG4581	Thiolase	2	9	9	2	0	9	9.17	0.00020008	1	2	2	1	0	2	4.9	0.0002032	3	9	9	3	0	9	14.07	0.00054137	2	3	3	2	0	3	10.66	0.00023958	X	X	X	X
133	0.000191	1	0.000368	3	0	0	1.79769e+308	1	NP_732744.1	NP_732744.1	adaptor protein complex 2, mu subunit, isoform A [Drosophila melanogaster]	CG7057	AP-2mu	1	8	8	1	0	8	3.66	0.00019087	2	4	4	2	0	4	7.78	0.00043617	4	9	9	4	0	9	16.93	0.00058102	1	1	1	1	0	1	3.66	8.571e-05	X	X	X	X
134	0.000189	1	0.000254	3	0	0	1.79769e+308	1	NP_524651.2	NP_524651.2	chromosome bows, isoform A [Drosophila melanogaster]	CG32435	chb	3	27	27	3	0	27	4.02	0.00018881	2	3	3	2	0	3	1.95	9.588e-05	7	18	18	7	0	18	6.71	0.00034058	6	13	13	6	0	13	6.24	0.00032656	X	X	X	X
135	0.000188	1	0.000155	3	0	0	1.79769e+308	2	NP_001261997.1;NP_649001.1	NP_001261997.1	CREB-regulated transcription coactivator, isoform B [Drosophila melanogaster]	CG6064	Crtc	1	16	16	1	0	16	2.7	0.00018765	2	2	2	2	0	2	6.3	0.0001072	1	2	2	1	0	2	3.6	6.347e-05	2	7	7	2	0	7	6.3	0.00029492	X	X	X	X
136	0.000187	1	7.4e-05	3	0	0	1.79769e+308	1	NP_609548.1	NP_609548.1	Ced-12 [Drosophila melanogaster]	CG5336	Ced-12	3	13	13	3	0	13	5.52	0.00018721	2	2	2	2	0	2	3.04	0.00013163	1	1	1	1	0	1	1.8	3.897e-05	1	1	1	1	0	1	1.66	5.173e-05	X	X	X	X
137	0.000186	1	0.000662	3	0	0	1.79769e+308	2	NP_001014552.1;NP_001014553.1	NP_001014552.1	zipper, isoform D [Drosophila melanogaster]	CG15792	zip	10	36	36	10	0	36	7.69	0.00018618	12	25	25	12	0	25	9.92	0.00059091	23	44	44	23	0	44	19.74	0.00061573	23	42	42	23	0	42	18.9	0.0007803	X	X	X	X
138	0.000184	1	0.000484	3	0	0	1.79769e+308	1	NP_476616.1	NP_476616.1	lamin, isoform A [Drosophila melanogaster]	CG6944	Lam	2	11	11	2	0	11	4.98	0.00018439	2	3	3	2	0	3	4.98	0.00022983	5	11	11	5	0	11	10.93	0.00049892	7	12	12	7	0	12	15.11	0.00072259	X	X	X	X
139	0.000184	1	0.000177	3	0	0	1.79769e+308	1	NP_732694.2	NP_732694.2	pitchoune, isoform B [Drosophila melanogaster]	CG6375	pit	2	12	12	2	0	12	3.97	0.00018399	3	5	5	3	0	5	6.03	0.00035038	2	3	3	2	0	3	3.97	0.00012446	1	1	1	1	0	1	2.06	5.508e-05	X	X	X	X
140	0.000177	1	0.000452	3	0	0	1.79769e+308	2	NP_476819.2;NP_995607.1	NP_476819.2	adaptor protein complex 2, alpha subunit, isoform A [Drosophila melanogaster]	CG4260	AP-2alpha	5	16	16	5	0	16	7.13	0.00017747	6	10	10	6	0	10	10.21	0.00050693	10	19	19	10	0	19	18.83	0.00057023	4	7	7	4	0	7	8.62	0.00027891	X	X	X	X
141	0.000177	1	0.000334	3	0	0	1.79769e+308	2	NP_001259667.1;NP_523395.1	NP_001259667.1	transcriptional adaptor 3, isoform C [Drosophila melanogaster]	CG7098	Ada3	2	10	10	2	0	10	6.12	0.00017732	4	11	11	4	0	11	12.41	0.00089143	1	1	1	1	0	1	4.59	4.798e-05	1	1	1	1	0	1	4.59	6.37e-05	X	X	X	X
142	0.000172	1	0.001234	3	0	0	1.79769e+308	1	NP_525002.1	NP_525002.1	thioredoxin peroxidase 2, isoform A [Drosophila melanogaster]	CG1274	Jafrac2	2	4	4	2	0	4	8.68	0.00017233	4	6	6	4	0	6	19.83	0.00118144	6	11	11	6	0	11	35.12	0.00128234	4	8	8	4	0	8	21.07	0.00123816	X	X	X	X
143	0.000172	1	0.000457	3	0	0	1.79769e+308	1	NP_649466.1	NP_649466.1	lost [Drosophila melanogaster]	CG14648	lost	3	9	9	3	0	9	6.61	0.00017218	5	7	7	5	0	7	14.86	0.00061203	4	8	8	4	0	8	11.01	0.00041411	3	5	5	3	0	5	7.71	0.00034362	X	X	X	X
145	0.000171	1	0.000215	3	0	0	1.79769e+308	4	NP_001247254.1;NP_001262860.1;NP_001303430.1;NP_788722.1	NP_001247254.1	unkempt, isoform D [Drosophila melanogaster]	CG4620	unk	3	11	11	3	0	11	7.44	0.00017067	2	3	3	2	0	3	4.17	0.00021273	1	1	1	1	0	1	2.23	4.198e-05	4	7	7	4	0	7	11.76	0.00039015	X	X	X	X
146	0.000166	1	0.000883	3	0	0	1.79769e+308	2	NP_001259324.1;NP_572451.1	NP_001259324.1	uncharacterized protein CG10959, isoform B [Drosophila melanogaster]	CG10959	CG10959	4	7	7	4	0	7	9.07	0.0001655	10	19	19	10	0	19	29.02	0.002053	3	4	4	3	0	4	6.8	0.00025589	3	4	4	3	0	4	7.03	0.00033972	X	X	X	X
147	0.000164	1	0.000226	3	0	0	1.79769e+308	10	NP_001036692.1;NP_001036695.1;NP_001036697.1;NP_001189200.1;NP_001262414.1;NP_001262415.1;NP_001287252.1;NP_001287253.1;NP_731355.1;NP_731356.1	NP_001036692.1	pasilla, isoform F [Drosophila melanogaster]	CG42670	ps	3	9	9	3	0	9	8.04	0.00016405	2	3	3	2	0	3	6.12	0.00024992	1	6	6	1	0	6	3.67	0.00029593	1	2	2	1	0	2	3.67	0.00013096	X	X	X	X
149	0.00016	1	0.000557	3	0	0	1.79769e+308	1	NP_647918.2	NP_647918.2	histone deacetylase 1 [Drosophila melanogaster]	CG7471	HDAC1	2	8	8	2	0	8	5.37	0.0001601	2	10	10	2	0	10	8.83	0.00091461	4	6	6	4	0	6	14.4	0.00032489	4	6	6	4	0	6	14.4	0.00043134	X	X	X	X
150	0.000159	1	0.001119	3	0	0	1.79769e+308	2	NP_731598.1;NP_731599.1	NP_731598.1	jupiter, isoform C [Drosophila melanogaster]	CG31363	Jupiter	2	3	3	2	0	3	14.72	0.00015878	2	6	6	2	0	6	17.77	0.00145131	4	8	8	4	0	8	34.01	0.00114565	2	4	4	2	0	4	17.77	0.00076049	X	X	X	X
151	0.000158	1	0.000199	3	0	0	1.79769e+308	1	NP_523915.1	NP_523915.1	replication factor C subunit 4 [Drosophila melanogaster]	CG14999	RfC4	1	5	5	1	0	5	6.95	0.0001575	1	1	1	1	0	1	4.23	0.00014396	3	4	4	3	0	4	16.31	0.00034093	1	1	1	1	0	1	6.95	0.00011315	X	X	X	X
152	0.000157	1	0.000221	3	0	0	1.79769e+308	2	NP_001261838.1;NP_524068.2	NP_001261838.1	stonewall, isoform B [Drosophila melanogaster]	CG3836	stwl	4	15	15	4	0	15	7.31	0.00015655	4	6	6	4	0	6	8.31	0.00028619	6	8	8	6	0	8	10.71	0.00022592	3	4	4	3	0	4	4.4	0.00014997	X	X	X	X
153	0.000156	1	0.000318	3	0	0	1.79769e+308	2	NP_608362.2;NP_728308.1	NP_608362.2	nucleoporin 205kD, isoform A [Drosophila melanogaster]	CG11943	Nup205	7	31	31	7	0	31	5.52	0.00015637	6	16	16	6	0	16	4.69	0.00036885	8	15	15	8	0	15	6.34	0.00020473	10	21	21	10	0	21	8.37	0.00038052	X	X	X	X
154	0.000155	1	0.000207	3	0	0	1.79769e+308	1	NP_572687.1	NP_572687.1	Kinesin-like protein at 10A, isoform A [Drosophila melanogaster]	CG1453	Klp10A	3	12	12	3	0	12	8.57	0.00015542	2	4	4	2	0	4	4.47	0.00023678	4	7	7	4	0	7	7.33	0.00024532	1	3	3	1	0	3	2.73	0.00013958	X	X	X	X
155	0.000148	1	0.000224	3	0	0	1.79769e+308	1	NP_476858.1	NP_476858.1	downstream of receptor kinase, isoform A [Drosophila melanogaster]	CG6033	drk	1	3	3	1	0	3	6.16	0.00014824	1	1	1	1	0	1	5.69	0.00022584	1	2	2	1	0	2	13.27	0.00026741	1	1	1	1	0	1	13.27	0.00017751	X	X	X	X
156	0.000148	1	0.000222	3	0	0	1.79769e+308	1	NP_610355.1	NP_610355.1	nucleoporin 50kD [Drosophila melanogaster]	CG2158	Nup50	3	8	8	3	0	8	8.87	0.00014789	2	2	2	2	0	2	6.91	0.00016898	1	2	2	1	0	2	2.84	0.00010004	3	6	6	3	0	6	8.87	0.00039845	X	X	X	X
157	0.000146	1	0.000651	3	0	0	1.79769e+308	1	NP_524364.2	NP_524364.2	FK506-binding protein 1 [Drosophila melanogaster]	CG6226	FK506-bp1	3	5	5	3	0	5	10.36	0.00014603	2	3	3	2	0	3	7.28	0.00040043	6	13	13	6	0	13	18.49	0.00102731	4	5	5	4	0	5	14.29	0.00052457	X	X	X	X
158	0.000144	1	0.000327	3	0	0	1.79769e+308	3	NP_001137758.1;NP_001246494.1;NP_523849.3	NP_001137758.1	nucleosome remodeling factor - 38kD, isoform B [Drosophila melanogaster]	CG4634	Nurf-38	1	4	4	1	0	4	5.52	0.00014381	1	4	4	1	0	4	5.52	0.00065726	1	2	2	1	0	2	5.52	0.00019456	1	1	1	1	0	1	5.52	0.00012915	X	X	X	X
159	0.000143	1	0.00124	3	0	0	1.79769e+308	2	NP_524615.1;NP_733465.1	NP_524615.1	Microtubule-associated protein 205, isoform A [Drosophila melanogaster]	CG1483	Map205	5	16	16	5	0	16	7.31	0.00014344	10	17	17	10	0	17	14.45	0.00069654	18	45	45	18	0	45	23.99	0.00109159	21	60	60	21	0	60	26.57	0.00193229	X	X	X	X
160	0.000143	1	0.000217	3	0	0	1.79769e+308	1	NP_730768.1	NP_730768.1	Mesoderm-expressed 2, isoform B [Drosophila melanogaster]	CG11100	Mes2	3	6	6	3	0	6	11.67	0.00014315	4	4	4	4	0	4	13.04	0.00043617	1	2	2	1	0	2	3.66	0.00012911	1	1	1	1	0	1	3.66	8.571e-05	X	X	X	X
161	0.000143	1	6.3e-05	3	0	0	1.79769e+308	2	NP_001096913.1;NP_996381.1	NP_001096913.1	topoisomerase related function 4-1, isoform F [Drosophila melanogaster]	CG11265	Trf4-1	2	11	11	2	0	11	4.61	0.000143	1	1	1	1	0	1	2.12	5.942e-05	1	1	1	1	0	1	2.12	3.518e-05	1	2	2	1	0	2	2.12	9.34e-05	X	X	X	X
162	0.000139	1	0.000155	3	0	0	1.79769e+308	2	NP_724502.1;NP_724503.2	NP_724502.1	klaroid, isoform D [Drosophila melanogaster]	CG44154	koi	1	6	6	1	0	6	3.12	0.00013933	2	3	3	2	0	3	5.79	0.00031838	1	1	1	1	0	1	2.9	6.283e-05	1	1	1	1	0	1	2.67	8.342e-05	X	X	X	X
163	0.000138	1	0.000801	3	0	0	1.79769e+308	1	NP_523366.2	NP_523366.2	cyclophilin 1 [Drosophila melanogaster]	CG9916	Cyp1	1	3	3	1	0	3	6.17	0.00013779	1	1	1	1	0	1	6.61	0.00020992	4	11	11	4	0	11	31.28	0.00136708	3	5	5	3	0	5	24.67	0.00082498	X	X	X	X
164	0.000138	1	0.000192	3	0	0	1.79769e+308	2	NP_001286156.1;NP_523648.3	NP_001286156.1	inner centromere protein, isoform C [Drosophila melanogaster]	CG12165	Incenp	2	10	10	2	0	10	4.38	0.00013828	3	5	5	3	0	5	5.7	0.00031599	1	3	3	1	0	3	1.86	0.00011225	1	3	3	1	0	3	1.86	0.00014902	X	X	X	X
165	0.000137	1	0.000237	3	0	0	1.79769e+308	1	NP_573057.1	NP_573057.1	uncharacterized protein CG9281, isoform B [Drosophila melanogaster]	CG9281	CG9281	5	8	8	5	0	8	9.33	0.00013651	2	3	3	2	0	3	3.76	0.00023397	3	5	5	3	0	5	6.06	0.00023086	2	4	4	2	0	4	4.75	0.0002452	X	X	X	X
166	0.000137	1	7.1e-05	3	0	0	1.79769e+308	8	NP_001260962.1;NP_001260963.1;NP_001260964.1;NP_001260965.1;NP_001286404.1;NP_610927.3;NP_725357.2;NP_725358.1	NP_001260962.1	reduction in Cnn dots 1, isoform D [Drosophila melanogaster]	CG8233	Rcd1	3	14	14	3	0	14	4.5	0.00013693	1	2	2	1	0	2	1.22	8.94e-05	1	2	2	1	0	2	1.41	5.293e-05	2	2	2	2	0	2	2.63	7.027e-05	X	X	X	X
167	0.000136	1	0.000731	3	0	0	1.79769e+308	1	NP_001261051.1	NP_001261051.1	patronin, isoform I [Drosophila melanogaster]	CG33130	Patronin	9	22	22	9	0	22	8.11	0.00013581	7	15	15	7	0	15	8.82	0.00042319	14	37	37	14	0	37	15.87	0.00061802	20	52	52	20	0	52	22.14	0.00115312	X	X	X	X
168	0.000136	1	0.000165	3	0	0	1.79769e+308	1	NP_524907.2	NP_524907.2	rasputin, isoform B [Drosophila melanogaster]	CG9412	rin	2	9	9	2	0	9	4.06	0.00013599	2	4	4	2	0	4	6.67	0.00027624	3	4	4	3	0	4	7.39	0.00016355	1	1	1	1	0	1	4.06	5.428e-05	X	X	X	X
169	0.000135	1	0.000277	3	0	0	1.79769e+308	2	NP_724582.1;NP_724583.1	NP_724582.1	scraps, isoform B [Drosophila melanogaster]	CG2092	scra	5	16	16	5	0	16	6.05	0.00013464	5	11	11	5	0	11	7.1	0.00042305	1	2	2	1	0	2	1.86	4.554e-05	6	12	12	6	0	12	8.47	0.00036275	X	X	X	X
170	0.000135	1	7.6e-05	3	0	0	1.79769e+308	1	NP_524220.1	NP_524220.1	abstrakt [Drosophila melanogaster]	CG14637	abs	1	8	8	1	0	8	2.75	0.00013475	1	1	1	1	0	1	2.75	7.698e-05	1	2	2	1	0	2	2.75	9.115e-05	1	1	1	1	0	1	2.75	6.051e-05	X	X	X	X
171	0.000133	1	0.000283	3	0	0	1.79769e+308	4	NP_001163371.1;NP_001261512.1;NP_001261513.1;NP_523959.2	NP_001163371.1	smallminded, isoform C [Drosophila melanogaster]	CG8571	smid	4	12	12	4	0	12	7.85	0.00013268	3	4	4	3	0	4	4.98	0.00020213	7	11	11	7	0	11	15.16	0.00032909	4	8	8	4	0	8	8.48	0.00031775	X	X	X	X
172	0.000132	1	0.001189	3	0	0	1.79769e+308	2	NP_573324.1;NP_573325.1	NP_573324.1	uncharacterized protein CG18259 [Drosophila melanogaster]	CG18259	CG18259	1	6	6	1	0	6	4.01	0.00013198	3	4	4	3	0	4	11.6	0.00040212	6	12	12	6	0	12	19.41	0.00071422	11	31	31	11	0	31	35.86	0.00244954	X	X	X	X
173	0.000132	1	0.000524	3	0	0	1.79769e+308	2	NP_001262163.1;NP_788563.1	NP_001262163.1	golgi complex-localized glycoprotein 1, isoform B [Drosophila melanogaster]	CG33214	Glg1	4	14	14	4	0	14	5.96	0.00013186	5	10	10	5	0	10	8.04	0.00043045	4	5	5	4	0	5	6.41	0.00012742	15	30	30	15	0	30	22.31	0.00101502	X	X	X	X
174	0.000131	1	0.001286	3	0	0	1.79769e+308	1	NP_611878.1	NP_611878.1	eukaryotic translation elongation factor 5, isoform A [Drosophila melanogaster]	CG3186	eIF-5A	1	2	2	1	0	2	7.55	0.00013115	2	4	4	2	0	4	18.87	0.00119877	2	11	11	2	0	11	18.87	0.00195174	1	3	3	1	0	3	7.55	0.00070668	X	X	X	X
175	0.00013	1	0.000634	3	0	0	1.79769e+308	2	NP_612104.1;NP_728599.1	NP_612104.1	uncharacterized protein CG2199, isoform A [Drosophila melanogaster]	CG2199	CG2199	2	9	9	2	0	9	4.28	0.00012961	3	11	11	3	0	11	6.63	0.00072398	1	1	1	1	0	1	2.07	3.897e-05	8	22	22	8	0	22	16.57	0.00113811	X	X	X	X
176	0.00013	1	0.000223	3	0	0	1.79769e+308	1	NP_651080.2	NP_651080.2	nucleoporin 133kD [Drosophila melanogaster]	CG6958	Nup133	5	15	15	5	0	15	5.58	0.00013033	3	8	8	3	0	8	3.75	0.00031767	5	7	7	5	0	7	7.5	0.00016457	4	6	6	4	0	6	6.58	0.00018727	X	X	X	X
178	0.000125	1	0.000163	3	0	0	1.79769e+308	1	NP_648756.1	NP_648756.1	Pre-mRNA processing factor 31 [Drosophila melanogaster]	CG6876	Prp31	2	6	6	2	0	6	6.59	0.00012487	1	1	1	1	0	1	3.79	9.511e-05	2	3	3	2	0	3	7.98	0.00016893	3	3	3	3	0	3	11.78	0.00022428	X	X	X	X
179	0.000123	1	0.000223	3	0	0	1.79769e+308	7	NP_001247019.1;NP_001247020.1;NP_001262457.1;NP_001262458.1;NP_649991.2;NP_649993.2;NP_996191.1	NP_001247019.1	uncharacterized protein CG43143, isoform F [Drosophila melanogaster]	CG43143	CG43143	3	18	18	3	0	18	3.98	0.0001225	6	15	15	6	0	15	6.59	0.00046656	4	7	7	4	0	7	4.37	0.0001289	2	3	3	2	0	3	2.87	7.334e-05	X	X	X	X
180	0.000122	1	0.000261	3	0	0	1.79769e+308	1	NP_652051.1	NP_652051.1	lethal (3) 05822, isoform A [Drosophila melanogaster]	CG7129	l(3)05822	2	7	7	2	0	7	4.67	0.00012164	1	1	1	1	0	1	3.33	7.942e-05	3	7	7	3	0	7	7.5	0.00032913	5	6	6	5	0	6	15.5	0.00037454	X	X	X	X
181	0.000121	1	0.001042	3	0	0	1.79769e+308	1	NP_524996.1	NP_524996.1	belphegor, isoform A [Drosophila melanogaster]	CG6815	bor	4	7	7	4	0	7	9.6	0.00012083	8	17	17	8	0	17	18.21	0.00134118	8	17	17	8	0	17	18.54	0.00079403	8	16	16	8	0	16	17.05	0.00099217	X	X	X	X
182	0.000121	1	0.000613	3	0	0	1.79769e+308	1	NP_524354.1	NP_524354.1	chromatin assembly factor 1, p55 subunit, isoform A [Drosophila melanogaster]	CG4236	Caf1-55	3	5	5	3	0	5	9.3	0.00012124	1	2	2	1	0	2	3.02	0.00022163	6	18	18	6	0	18	28.6	0.00118095	3	5	5	3	0	5	13.49	0.00043551	X	X	X	X
183	0.00012	1	0.000235	3	0	0	1.79769e+308	1	NP_477041.1	NP_477041.1	pendulin [Drosophila melanogaster]	CG4799	Pen	2	6	6	2	0	6	7.47	0.00011984	1	2	2	1	0	2	2.87	0.00018257	3	7	7	3	0	7	10.73	0.00037832	1	2	2	1	0	2	4.98	0.0001435	X	X	X	X
184	0.00012	1	7.4e-05	3	0	0	1.79769e+308	1	NP_001188748.1	NP_001188748.1	taiman, isoform F [Drosophila melanogaster]	CG13109	tai	5	22	22	5	0	22	6.73	0.00011959	1	2	2	1	0	2	0.57	4.969e-05	1	1	1	1	0	1	1.15	1.471e-05	5	8	8	5	0	8	5.53	0.00015622	X	X	X	X
185	0.000118	1	0.000411	3	0	0	1.79769e+308	1	NP_477395.1	NP_477395.1	coat protein (coatomer) alpha, isoform A [Drosophila melanogaster]	CG7961	alphaCOP	5	14	14	5	0	14	5.83	0.00011829	9	14	14	9	0	14	9.64	0.00054061	10	21	21	10	0	21	11.75	0.0004801	5	7	7	5	0	7	5.75	0.00021246	X	X	X	X
186	0.000117	1	0.000599	3	0	0	1.79769e+308	2	NP_001246225.1;NP_610488.1	NP_001246225.1	ced-6, isoform D [Drosophila melanogaster]	CG11804	ced-6	2	6	6	2	0	6	8.44	0.00011737	1	2	2	1	0	2	3	0.0001788	6	12	12	6	0	12	18.76	0.00063516	6	14	14	6	0	14	23.45	0.00098379	X	X	X	X
187	0.000115	1	0.001194	3	0	0	1.79769e+308	1	NP_649899.1	NP_649899.1	rumpelstiltskin, isoform A [Drosophila melanogaster]	CG9373	rump	3	7	7	3	0	7	9.34	0.00011548	6	28	28	6	0	28	13.77	0.00211113	5	25	25	5	0	25	15.98	0.00111596	3	6	6	3	0	6	12.18	0.00035558	X	X	X	X
188	0.000115	1	0.00015	3	0	0	1.79769e+308	1	NP_524473.2	NP_524473.2	krueppel target at 95D, isoform A [Drosophila melanogaster]	CG5405	KrT95D	4	13	13	4	0	13	7.32	0.00011535	4	5	5	4	0	5	8.34	0.00020277	4	9	9	4	0	9	5.19	0.00021609	1	1	1	1	0	1	1.28	3.188e-05	X	X	X	X
189	0.000111	1	0.0004	3	0	0	1.79769e+308	1	NP_524331.2	NP_524331.2	Actin-related protein 1 [Drosophila melanogaster]	CG6174	Arp1	1	4	4	1	0	4	4.26	0.00011092	1	1	1	1	0	1	4.26	0.00012673	4	9	9	4	0	9	25.53	0.00067528	2	4	4	2	0	4	12.23	0.00039845	X	X	X	X
190	0.000109	1	0.000673	3	0	0	1.79769e+308	2	NP_731472.1;NP_731473.1	NP_731472.1	slender lobes, isoform B [Drosophila melanogaster]	CG12819	sle	5	15	15	5	0	15	5.31	0.00010937	11	33	33	11	0	33	12.52	0.00109964	9	20	20	9	0	20	9.86	0.00039457	10	20	20	10	0	20	11.82	0.00052384	X	X	X	X
191	0.000108	1	0.000131	3	0	0	1.79769e+308	2	NP_001285800.1;NP_609373.1	NP_001285800.1	no mitochondrial derivative, isoform B [Drosophila melanogaster]	CG5395	nmd	2	3	3	2	0	3	7.61	0.00010823	1	1	1	1	0	1	3.81	0.00016488	1	1	1	1	0	1	5.54	9.762e-05	1	1	1	1	0	1	5.54	0.0001296	X	X	X	X
192	0.000107	1	0.000197	3	0	0	1.79769e+308	2	NP_523890.2;NP_728757.1	NP_523890.2	daughter of sevenless, isoform A [Drosophila melanogaster]	CG1044	dos	2	9	9	2	0	9	3.99	0.00010687	1	3	3	1	0	3	3.42	0.00016282	3	4	4	3	0	4	7.18	0.00012853	3	7	7	3	0	7	8.54	0.00029861	X	X	X	X
193	0.000102	1	5.1e-05	3	0	0	1.79769e+308	1	NP_611884.1	NP_611884.1	something that sticks like glue, isoform A [Drosophila melanogaster]	CG3231	snama	4	12	12	4	0	12	7.15	0.00010164	2	2	2	2	0	2	2.6	7.742e-05	2	2	2	2	0	2	3.25	4.584e-05	1	1	1	1	0	1	2.11	3.043e-05	X	X	X	X
194	0.000101	1	0.000367	3	0	0	1.79769e+308	1	NP_476755.1	NP_476755.1	suppressor of variegation 205, isoform A [Drosophila melanogaster]	CG8409	Su(var)205	1	2	2	1	0	2	4.37	0.00010123	1	2	2	1	0	2	4.37	0.00046263	2	2	2	2	0	2	12.14	0.0002739	1	2	2	1	0	2	4.37	0.00036363	X	X	X	X
195	0.0001	1	0.00123	3	0	0	1.79769e+308	6	NP_001163194.1;NP_001246406.1;NP_001246407.1;NP_001286574.1;NP_611331.2;NP_725793.1	NP_001163194.1	uncharacterized protein CG5174, isoform L [Drosophila melanogaster]	CG5174	CG5174	1	2	2	1	0	2	6.7	9.977e-05	2	3	3	2	0	3	15.31	0.00068399	3	5	5	3	0	5	25.36	0.00067492	7	13	13	7	0	13	48.33	0.00232969	X	X	X	X
196	0.0001	1	0.000131	3	0	0	1.79769e+308	2	NP_001036451.1;NP_001163052.1	NP_001036451.1	Nipped-B, isoform F [Drosophila melanogaster]	CG17704	Nipped-B	8	20	20	8	0	20	6.98	0.0001004	5	14	14	5	0	14	4.96	0.00032119	2	4	4	2	0	4	1.49	5.433e-05	1	1	1	1	0	1	0.58	1.803e-05	X	X	X	X
197	9.9e-05	1	0.000378	3	0	0	1.79769e+308	1	NP_609217.1	NP_609217.1	WD repeat domain 82 [Drosophila melanogaster]	CG17293	Wdr82	1	3	3	1	0	3	7.26	9.867e-05	2	4	4	2	0	4	13.56	0.00060128	1	2	2	1	0	2	6.31	0.00017799	2	3	3	2	0	3	12.62	0.00035446	X	X	X	X
198	9.8e-05	1	0.000194	3	0	0	1.79769e+308	3	NP_001245420.1;NP_524621.2;NP_726567.2	NP_001245420.1	host cell factor, isoform E [Drosophila melanogaster]	CG1710	Hcf	7	14	14	7	0	14	7.68	9.836e-05	5	11	11	5	0	11	5.19	0.00035321	2	4	4	2	0	4	1.75	7.604e-05	4	6	6	4	0	6	3.57	0.00015143	X	X	X	X
199	9.6e-05	1	0.000237	3	0	0	1.79769e+308	2	NP_001246639.1;NP_729092.1	NP_001246639.1	scrawny, isoform G [Drosophila melanogaster]	CG5505	scny	3	9	9	3	0	9	5.94	9.614e-05	4	11	11	4	0	11	7.17	0.00053705	1	2	2	1	0	2	1.54	5.781e-05	2	3	3	2	0	3	2.66	0.00011513	X	X	X	X
200	9.6e-05	1	6.6e-05	3	0	0	1.79769e+308	7	NP_001137903.1;NP_001137904.1;NP_001246659.1;NP_001261521.1;NP_001261523.1;NP_648132.2;NP_729264.2	NP_001137903.1	uncharacterized protein CG7546, isoform C [Drosophila melanogaster]	CG7546	CG7546	3	11	11	3	0	11	6.09	9.565e-05	1	2	2	1	0	2	1.83	7.948e-05	1	1	1	1	0	1	1.83	2.353e-05	2	3	3	2	0	3	3.67	9.371e-05	X	X	X	X
201	9.5e-05	1	0.000169	3	0	0	1.79769e+308	1	NP_610095.1	NP_610095.1	uncharacterized protein CG9246 [Drosophila melanogaster]	CG9246	CG9246	2	7	7	2	0	7	3.26	9.528e-05	2	4	4	2	0	4	4.05	0.00024883	2	3	3	2	0	3	3.79	0.00011049	1	3	3	1	0	3	1.83	0.00014669	X	X	X	X
202	9.4e-05	1	0.00047	3	0	0	1.79769e+308	1	NP_611604.1	NP_611604.1	eukaryotic translation initiation factor 3 subunit k [Drosophila melanogaster]	CG10306	CG10306	1	2	2	1	0	2	7.21	9.393e-05	2	4	4	2	0	4	18.47	0.00085858	2	3	3	2	0	3	14.41	0.00038124	1	1	1	1	0	1	6.31	0.00016871	X	X	X	X
203	9.4e-05	1	0.000101	3	0	0	1.79769e+308	1	NP_477086.2	NP_477086.2	activated Cdc42 kinase-like, isoform A [Drosophila melanogaster]	CG43741	Ack-like	2	12	12	2	0	12	2.92	9.358e-05	2	2	2	2	0	2	2.17	7.128e-05	3	3	3	3	0	3	4.86	6.33e-05	4	6	6	4	0	6	6.43	0.00016808	X	X	X	X
204	9.3e-05	1	0.000206	3	0	0	1.79769e+308	1	NP_511140.1	NP_511140.1	casein kinase ialpha, isoform B [Drosophila melanogaster]	CG2028	CkIalpha	2	3	3	2	0	3	6.53	9.282e-05	2	3	3	2	0	3	8.9	0.00042419	1	1	1	1	0	1	4.75	8.371e-05	1	1	1	1	0	1	2.97	0.00011114	X	X	X	X
205	9.3e-05	1	0.000182	3	0	0	1.79769e+308	2	NP_001014605.1;NP_524229.1	NP_001014605.1	germ line transcription factor 1, isoform B [Drosophila melanogaster]	CG1119	Gnf1	4	9	9	4	0	9	5.95	9.309e-05	2	6	6	2	0	6	3.17	0.00028364	4	8	8	4	0	8	8.33	0.0002239	1	1	1	1	0	1	0.99	3.716e-05	X	X	X	X
206	9.3e-05	1	4.2e-05	3	0	0	1.79769e+308	2	NP_477186.1;NP_724569.1	NP_477186.1	dilute class unconventional myosin, isoform A [Drosophila melanogaster]	CG2146	didum	6	16	16	6	0	16	4.97	9.309e-05	2	2	2	2	0	2	2.12	5.318e-05	1	2	2	1	0	2	1.23	3.149e-05	1	2	2	1	0	2	1.51	4.18e-05	X	X	X	X
207	9.1e-05	1	0.000169	3	0	0	1.79769e+308	1	NP_650208.1	NP_650208.1	uncharacterized protein CG5608 [Drosophila melanogaster]	CG5608	CG5608	2	6	6	2	0	6	4.51	9.106e-05	1	1	1	1	0	1	2.04	6.936e-05	2	4	4	2	0	4	4.37	0.00016426	4	5	5	4	0	5	8.59	0.00027259	X	X	X	X
208	8.9e-05	1	0.000734	3	0	0	1.79769e+308	1	NP_523957.1	NP_523957.1	lark, isoform A [Drosophila melanogaster]	CG8597	lark	1	3	3	1	0	3	4.83	8.886e-05	4	8	8	4	0	8	19.03	0.00108298	2	2	2	2	0	2	8.81	0.00016029	5	9	9	5	0	9	23.86	0.00095764	X	X	X	X
209	8.7e-05	1	0.000272	3	0	0	1.79769e+308	1	NP_523899.1	NP_523899.1	heat shock protein 83, isoform A [Drosophila melanogaster]	CG1242	Hsp83	2	6	6	2	0	6	4.32	8.725e-05	3	3	3	3	0	3	5.86	0.00019938	4	9	9	4	0	9	9.21	0.00035412	3	5	5	3	0	5	6.56	0.00026119	X	X	X	X
210	8.7e-05	1	9.1e-05	3	0	0	1.79769e+308	2	NP_001246461.1;NP_726199.3	NP_001246461.1	rad50, isoform E [Drosophila melanogaster]	CG6339	rad50	4	11	11	4	0	11	4.86	8.702e-05	2	4	4	2	0	4	2.12	0.00014462	1	2	2	1	0	2	0.99	4.281e-05	2	3	3	2	0	3	2.5	8.525e-05	X	X	X	X
211	8.6e-05	1	0.001389	3	0	0	1.79769e+308	4	NP_001247366.1;NP_001263104.1;NP_001287608.1;NP_524873.1	NP_001247366.1	ferritin 1 heavy chain homologue, isoform F [Drosophila melanogaster]	CG2216	Fer1HCH	1	2	2	1	0	2	7.44	8.617e-05	2	7	7	2	0	7	13.22	0.00137834	2	4	4	2	0	4	13.22	0.00046631	6	15	15	6	0	15	32.23	0.00232155	X	X	X	X
212	8.5e-05	1	0.00057	3	0	0	1.79769e+308	1	NP_477128.1	NP_477128.1	nucleosome assembly protein 1, isoform A [Drosophila melanogaster]	CG5330	Nap1	1	3	3	1	0	3	4.86	8.454e-05	3	5	5	3	0	5	12.97	0.00064394	4	10	10	4	0	10	16.22	0.00076247	2	3	3	2	0	3	10	0.00030368	X	X	X	X
213	8.5e-05	1	0.000386	3	0	0	1.79769e+308	1	NP_648672.1	NP_648672.1	short spindle 2, isoform A [Drosophila melanogaster]	CG9028	ssp2	3	8	8	3	0	8	5.91	8.494e-05	1	5	5	1	0	5	2.95	0.00024262	6	12	12	6	0	12	12.32	0.00034474	5	15	15	5	0	15	10.18	0.00057211	X	X	X	X
214	8.5e-05	1	0.000185	3	0	0	1.79769e+308	3	NP_001163216.1;NP_995906.1;NP_995907.1	NP_001163216.1	heterogeneous nuclear ribonucleoprotein K, isoform E [Drosophila melanogaster]	CG13425	HnRNP-K	1	4	4	1	0	4	2.84	8.459e-05	1	2	2	1	0	2	2.84	0.00019331	3	5	5	3	0	5	8.92	0.00028612	1	1	1	1	0	1	3.45	7.597e-05	X	X	X	X
215	8.5e-05	1	0.000138	3	0	0	1.79769e+308	6	NP_001097377.2;NP_001246420.1;NP_001246421.1;NP_476877.1;NP_725886.2;NP_725889.1	NP_001097377.2	hu li tai shao, isoform P [Drosophila melanogaster]	CG43443	hts	5	15	15	5	0	15	5.18	8.532e-05	5	8	8	5	0	8	5.18	0.00020797	4	8	8	4	0	8	4.2	0.00012313	2	4	4	2	0	4	2.29	8.173e-05	X	X	X	X
216	8.4e-05	1	0.000855	3	0	0	1.79769e+308	1	NP_476885.2	NP_476885.2	14-3-3zeta, isoform D [Drosophila melanogaster]	CG17870	14-3-3zeta	1	2	2	1	0	2	7.66	8.408e-05	3	10	10	3	0	10	17.34	0.00192142	1	3	3	1	0	3	11.69	0.00034127	1	2	2	1	0	2	11.69	0.00030205	X	X	X	X
217	8.4e-05	1	0.000485	3	0	0	1.79769e+308	4	NP_001188585.1;NP_524307.1;NP_572880.2;NP_731510.1	NP_001188585.1	Rbp1-like, isoform B [Drosophila melanogaster]	CG1987	Rbp1-like	1	2	2	1	0	2	5.26	8.442e-05	2	4	4	2	0	4	5.67	0.00077168	1	2	2	1	0	2	5.26	0.00022843	2	3	3	2	0	3	5.67	0.00045491	X	X	X	X
218	8.4e-05	1	0.000431	3	0	0	1.79769e+308	1	NP_572242.1	NP_572242.1	uncharacterized protein CG4119, isoform A [Drosophila melanogaster]	CG4119	CG4119	2	8	8	2	0	8	3.11	8.358e-05	4	6	6	4	0	6	9.52	0.00028648	8	25	25	8	0	25	14.83	0.0007067	4	8	8	4	0	8	8.62	0.00030023	X	X	X	X
219	8.3e-05	1	6.1e-05	3	0	0	1.79769e+308	5	NP_001097242.1;NP_001097243.1;NP_001097244.1;NP_001163099.1;NP_001286252.1	NP_001097242.1	Not1, isoform C [Drosophila melanogaster]	CG34407	Not1	7	20	20	7	0	20	4.51	8.324e-05	1	1	1	1	0	1	0.64	1.902e-05	7	12	12	7	0	12	5.27	0.00013515	1	2	2	1	0	2	0.84	2.99e-05	X	X	X	X
220	8.2e-05	1	0.000606	3	0	0	1.79769e+308	2	NP_001259081.1;NP_726631.1	NP_001259081.1	ATP synthase, beta subunit, isoform C [Drosophila melanogaster]	CG11154	ATPsynbeta	3	4	4	3	0	4	8.41	8.161e-05	2	11	11	2	0	11	6.85	0.00102576	7	13	13	7	0	13	22.5	0.00071771	1	1	1	1	0	1	3.52	7.33e-05	X	X	X	X
221	8.2e-05	1	0.000223	3	0	0	1.79769e+308	1	NP_610090.1	NP_610090.1	uncharacterized protein CG9253 [Drosophila melanogaster]	CG9253	CG9253	2	4	4	2	0	4	5.33	8.226e-05	1	1	1	1	0	1	3.35	9.399e-05	4	9	9	4	0	9	11.64	0.0005008	1	1	1	1	0	1	3.55	7.387e-05	X	X	X	X
222	8.1e-05	1	0.000117	3	0	0	1.79769e+308	1	NP_523719.1	NP_523719.1	imitation SWI, isoform A [Drosophila melanogaster]	CG8625	Iswi	4	8	8	4	0	8	4.19	8.122e-05	2	4	4	2	0	4	2.73	0.00018559	2	2	2	2	0	2	2.43	5.494e-05	2	3	3	2	0	3	3.41	0.00010941	X	X	X	X
223	8e-05	1	0.000627	3	0	0	1.79769e+308	1	NP_477494.2	NP_477494.2	female sterile (1) Yb [Drosophila melanogaster]	CG2706	fs(1)Yb	3	8	8	3	0	8	3.74	8.005e-05	5	11	11	5	0	11	6.91	0.00050304	12	23	23	12	0	23	17.66	0.00062271	10	21	21	10	0	21	11.9	0.00075484	X	X	X	X
224	8e-05	1	0.000274	3	0	0	1.79769e+308	3	NP_001137948.1;NP_729954.2;NP_729955.2	NP_001137948.1	Formin-like, isoform C [Drosophila melanogaster]	CG32138	CG32138	3	9	9	3	0	9	6.13	7.993e-05	5	10	10	5	0	10	6.22	0.00040589	5	8	8	5	0	8	9.2	0.00019224	5	7	7	5	0	7	9.2	0.00022332	X	X	X	X
225	8e-05	1	9.8e-05	3	0	0	1.79769e+308	1	NP_001027578.1	NP_001027578.1	kayak, isoform B [Drosophila melanogaster]	CG33956	kay	2	5	3	1	2	4.2	6.59	8.02e-05	2	4	0	0	4	2	4.95	0.00017455	1	2	0	0	2	1	3.11	5.167e-05	2	2	0	0	2	1	5.13	6.86e-05	X	X	X	X
226	8e-05	1	8.7e-05	3	0	0	1.79769e+308	1	NP_731688.2	NP_731688.2	MBD-R2 [Drosophila melanogaster]	CG10042	MBD-R2	2	9	9	2	0	9	2.91	8.027e-05	2	5	5	2	0	5	2.91	0.00020381	1	1	1	1	0	1	1.8	2.413e-05	1	1	1	1	0	1	1.8	3.204e-05	X	X	X	X
227	7.9e-05	1	0.000997	3	0	0	1.79769e+308	1	NP_523809.2	NP_523809.2	quaking related 58E-1, isoform A [Drosophila melanogaster]	CG3613	qkr58E-1	2	3	3	2	0	3	10.1	7.899e-05	2	3	3	2	0	3	9.6	0.00036099	7	17	17	7	0	17	31.31	0.0012111	6	15	15	6	0	15	26.26	0.00141872	X	X	X	X
228	7.6e-05	1	0.000141	3	0	0	1.79769e+308	1	NP_572929.1	NP_572929.1	nucleoporin 93kD-1 [Drosophila melanogaster]	CG11092	Nup93-1	3	6	6	3	0	6	5.35	7.601e-05	1	2	2	1	0	2	1.94	0.0001158	3	5	5	3	0	5	6.8	0.00017139	2	3	3	2	0	3	4.01	0.00013653	X	X	X	X
229	7.4e-05	1	0.000302	3	0	0	1.79769e+308	1	NP_609322.1	NP_609322.1	uncharacterized protein CG4598, isoform A [Drosophila melanogaster]	CG4598	CG4598	1	2	2	1	0	2	4.27	7.421e-05	1	1	1	1	0	1	4.27	0.00016958	2	6	6	2	0	6	13.17	0.00060238	1	1	1	1	0	1	8.9	0.00013329	X	X	X	X
230	7.3e-05	1	0.000136	3	0	0	1.79769e+308	1	NP_650257.1	NP_650257.1	piccolo [Drosophila melanogaster]	CG7769	pic	3	8	8	3	0	8	3.86	7.317e-05	3	7	7	3	0	7	4.65	0.0002926	2	2	2	2	0	2	2.81	4.949e-05	1	2	2	1	0	2	1.84	6.571e-05	X	X	X	X
231	7.3e-05	1	9.2e-05	3	0	0	1.79769e+308	1	NP_001014453.1	NP_001014453.1	PNUTS, isoform D [Drosophila melanogaster]	CG33526	PNUTS	1	8	8	1	0	8	1.94	7.349e-05	1	3	3	1	0	3	1.23	0.00012595	1	2	2	1	0	2	1.23	4.971e-05	2	3	3	2	0	3	3.17	9.9e-05	X	X	X	X
232	7.2e-05	1	0.000195	3	0	0	1.79769e+308	2	NP_001285400.1;NP_573267.3	NP_001285400.1	Rho GTPase activating protein at 16F, isoform E [Drosophila melanogaster]	CG7122	RhoGAP16F	2	4	4	2	0	4	4.99	7.178e-05	1	2	2	1	0	2	2.93	0.00016403	3	6	6	3	0	6	8.26	0.00029134	1	2	2	1	0	2	1.89	0.00012893	X	X	X	X
233	7.1e-05	1	0.000161	3	0	0	1.79769e+308	4	NP_001163784.1;NP_001263145.1;NP_524608.1;NP_733432.1	NP_001163784.1	coat protein (coatomer) gamma, isoform C [Drosophila melanogaster]	CG1528	gammaCOP	3	6	6	3	0	6	4.44	7.125e-05	1	2	2	1	0	2	2.96	0.00010854	4	9	9	4	0	9	7.52	0.00028918	2	2	2	2	0	2	3.3	8.532e-05	X	X	X	X
234	7e-05	1	0.000445	3	0	0	1.79769e+308	1	NP_001036462.1	NP_001036462.1	uncharacterized protein CG17528, isoform D [Drosophila melanogaster]	CG17528	CG17528	2	5	5	2	0	5	3.21	6.969e-05	2	6	6	2	0	6	4.28	0.00038223	6	12	12	6	0	12	10.29	0.00045259	8	10	10	8	0	10	13.9	0.00050073	X	X	X	X
235	7e-05	1	0.000119	3	0	0	1.79769e+308	3	NP_001259905.1;NP_608646.3;NP_722763.1	NP_001259905.1	tho2, isoform C [Drosophila melanogaster]	CG31671	tho2	4	11	11	4	0	11	3.35	6.989e-05	3	6	6	3	0	6	2.44	0.00017423	6	8	8	6	0	8	5.3	0.00013753	1	2	2	1	0	2	0.98	4.565e-05	X	X	X	X
236	6.8e-05	1	0.000296	3	0	0	1.79769e+308	1	NP_647958.1	NP_647958.1	cytochrome c1, isoform A [Drosophila melanogaster]	CG4769	Cyt-c1	1	2	2	1	0	2	5.21	6.792e-05	1	1	1	1	0	1	5.21	0.00015522	1	4	4	1	0	4	7.82	0.00036758	2	3	3	2	0	3	13.03	0.000366	X	X	X	X
237	6.8e-05	1	0.000143	3	0	0	1.79769e+308	2	NP_001259409.1;NP_572631.3	NP_001259409.1	no circadian temperature entrainment, isoform D [Drosophila melanogaster]	CG17255	nocte	5	15	15	5	0	15	4.03	6.785e-05	3	8	8	3	0	8	3.73	0.00016538	4	7	7	4	0	7	4.16	8.568e-05	7	11	11	7	0	11	5.77	0.00017874	X	X	X	X
239	6.4e-05	1	0.001004	3	0	0	1.79769e+308	1	NP_477381.1	NP_477381.1	Bub3, isoform A [Drosophila melanogaster]	CG7581	Bub3	2	2	2	2	0	2	10.12	6.396e-05	3	7	7	3	0	7	16.87	0.00102319	4	15	15	4	0	15	28.83	0.00129808	2	6	6	2	0	6	14.72	0.00068934	X	X	X	X
240	6.4e-05	1	0.000719	3	0	0	1.79769e+308	1	NP_572160.1	NP_572160.1	uncharacterized protein CG2982, isoform B [Drosophila melanogaster]	CG2982	CG2982	2	4	4	2	0	4	3.68	6.387e-05	4	13	13	4	0	13	11.33	0.00094865	7	16	16	7	0	16	21.59	0.00069125	5	9	9	5	0	9	14.55	0.00051621	X	X	X	X
241	6.3e-05	1	0.000198	3	0	0	1.79769e+308	2	NP_001284977.1;NP_572387.1	NP_001284977.1	uncharacterized protein CG1677, isoform D [Drosophila melanogaster]	CG1677	CG1677	1	6	6	1	0	6	1.6	6.262e-05	2	3	3	2	0	3	3.6	0.0001431	4	8	8	4	0	8	8.71	0.00022592	3	6	6	3	0	6	7.01	0.00022495	X	X	X	X
242	6.2e-05	1	0.000242	3	0	0	1.79769e+308	1	NP_524834.2	NP_524834.2	eukaryotic translation initiation factor 3 subunit h, isoform A [Drosophila melanogaster]	CG9124	eIF-3p40	1	2	2	1	0	2	4.44	6.169e-05	1	2	2	1	0	2	4.44	0.00028196	2	4	4	2	0	4	9.76	0.00033386	1	1	1	1	0	1	4.44	0.00011081	X	X	X	X
243	6.1e-05	1	0.000228	3	0	0	1.79769e+308	1	NP_001261000.1	NP_001261000.1	kinesin heavy chain 73, isoform E [Drosophila melanogaster]	CG8183	Khc-73	4	23	0	0	23	11.5	3.83	6.127e-05	4	6	1	1	5	6	3.42	0.00014609	9	17	2	2	15	12	8.43	0.00017299	10	19	1	1	18	19	9.35	0.00036363	X	X	X	X
244	6.1e-05	1	0.000134	3	0	0	1.79769e+308	2	NP_001259418.1;NP_788896.1	NP_001259418.1	sprint, isoform O [Drosophila melanogaster]	CG34414	spri	3	12	12	3	0	12	3.13	6.124e-05	3	3	3	3	0	3	2.99	6.997e-05	6	12	12	6	0	12	5.78	0.00016571	5	9	9	5	0	9	4.5	0.000165	X	X	X	X
245	6.1e-05	1	0.000116	3	0	0	1.79769e+308	1	NP_001138060.1	NP_001138060.1	uncharacterized protein CG42232 [Drosophila melanogaster]	CG42232	CG42232	6	20	20	6	0	20	2.88	6.06e-05	9	13	13	9	0	13	5.61	0.00018002	6	10	10	6	0	10	3.55	8.199e-05	6	8	8	6	0	8	3.31	8.708e-05	X	X	X	X
246	6e-05	1	0.000241	3	0	0	1.79769e+308	2	NP_648775.1;NP_730054.1	NP_648775.1	argonaute 2, isoform B [Drosophila melanogaster]	CG7439	AGO2	3	7	7	3	0	7	3.95	6.012e-05	3	5	5	3	0	5	4.37	0.00019626	9	20	20	9	0	20	13.59	0.00046477	1	2	2	1	0	2	2.31	6.17e-05	X	X	X	X
247	5.9e-05	1	0.00028	3	0	0	1.79769e+308	1	NP_610193.1	NP_610193.1	Ser/Thr-rich caspase, isoform A [Drosophila melanogaster]	CG7863	Strica	2	3	3	2	0	3	9.11	5.935e-05	1	2	2	1	0	2	5.88	0.00018084	3	7	7	3	0	7	8.16	0.00037473	3	4	4	3	0	4	10.44	0.00028428	X	X	X	X
248	5.9e-05	1	0.000131	3	0	0	1.79769e+308	4	NP_001261956.1;NP_001261957.1;NP_730182.1;NP_730184.1	NP_001261956.1	uncharacterized protein CG32165, isoform B [Drosophila melanogaster]	CG32165	CG32165	1	6	6	1	0	6	1.98	5.907e-05	2	5	5	2	0	5	4.15	0.00022498	1	1	1	1	0	1	1.51	2.664e-05	2	4	4	2	0	4	3.68	0.00014147	X	X	X	X
249	5.9e-05	1	0.000131	3	0	0	1.79769e+308	1	NP_523620.1	NP_523620.1	super sex combs, isoform B [Drosophila melanogaster]	CG10392	sxc	2	6	6	2	0	6	3.49	5.907e-05	2	4	4	2	0	4	3.31	0.00017999	3	4	4	3	0	4	5.48	0.00010656	3	3	3	3	0	3	4.82	0.0001061	X	X	X	X
250	5.8e-05	1	0.000315	3	0	0	1.79769e+308	2	NP_001188586.1;NP_001188587.1	NP_001188586.1	ajuba LIM protein, isoform C [Drosophila melanogaster]	CG11063	jub	1	4	4	1	0	4	3.76	5.808e-05	1	3	3	1	0	3	3.9	0.0001991	2	7	7	2	0	7	6.55	0.00027504	5	9	9	5	0	9	14.62	0.00046948	X	X	X	X
251	5.8e-05	1	0.000147	3	0	0	1.79769e+308	2	NP_001287262.1;NP_524296.2	NP_001287262.1	hyperplastic discs, isoform B [Drosophila melanogaster]	CG9484	hyd	6	16	16	6	0	16	3.78	5.778e-05	9	13	13	9	0	13	6.13	0.00021457	4	6	6	4	0	6	4.33	5.863e-05	8	13	13	8	0	13	5.78	0.00016865	X	X	X	X
252	5.7e-05	1	0.000362	3	0	0	1.79769e+308	1	NP_726551.2	NP_726551.2	uncharacterized protein CG31999, isoform A [Drosophila melanogaster]	CG31999	CG31999	1	5	5	1	0	5	1.09	5.685e-05	2	2	2	2	0	2	3.82	0.00010393	3	8	8	3	0	8	4.91	0.00024612	7	18	18	7	0	18	11.67	0.0007352	X	X	X	X
253	5.7e-05	1	0.000144	3	0	0	1.79769e+308	1	NP_524836.2	NP_524836.2	coat protein (coatomer) beta' [Drosophila melanogaster]	CG6699	beta'COP	2	5	5	2	0	5	3.5	5.704e-05	1	2	2	1	0	2	2.52	0.00010427	2	4	4	2	0	4	4.27	0.00012346	3	5	5	3	0	5	6.56	0.00020489	X	X	X	X
254	5.6e-05	1	0.000295	3	0	0	1.79769e+308	1	NP_649426.3	NP_649426.3	chromator, isoform A [Drosophila melanogaster]	CG10712	Chro	2	5	5	2	0	5	2.59	5.63e-05	2	5	5	2	0	5	2.48	0.0002573	4	10	10	4	0	10	5.94	0.00030466	4	8	8	4	0	8	8.42	0.00032358	X	X	X	X
255	5.6e-05	1	0.000107	3	0	0	1.79769e+308	1	NP_572274.1	NP_572274.1	ubiquitin specific protease 30, isoform A [Drosophila melanogaster]	CG3016	Usp30	1	3	3	1	0	3	6.27	5.606e-05	1	1	1	1	0	1	6.27	8.54e-05	1	2	2	1	0	2	3.41	0.00010112	2	2	2	2	0	2	8.6	0.00013424	X	X	X	X
256	5.5e-05	1	0.000322	3	0	0	1.79769e+308	16	NP_001096893.1;NP_001096895.1;NP_001096896.1;NP_001162679.1;NP_001188548.1;NP_001188549.1;NP_001259276.1;NP_001259277.1;NP_001259279.1;NP_001259280.1;NP_001259281.1;NP_001259282.1;NP_001259284.1;NP_001284946.1;NP_001284947.1;NP_001284948.1	NP_001096893.1	uncharacterized protein CG34417, isoform D [Drosophila melanogaster]	CG34417	CG34417	5	18	18	5	0	18	2.63	5.548e-05	8	20	20	8	0	20	4.02	0.00028171	8	25	25	8	0	25	4.4	0.00020848	13	43	43	13	0	43	6.92	0.00047607	X	X	X	X
257	5.4e-05	1	6e-05	3	0	0	1.79769e+308	1	NP_649325.2	NP_649325.2	Cyclin-dependent kinase 12, isoform A [Drosophila melanogaster]	CG7597	Cdk12	2	6	6	2	0	6	2.94	5.407e-05	3	3	3	3	0	3	3.11	0.00012356	1	1	1	1	0	1	2.33	2.438e-05	1	1	1	1	0	1	1.99	3.237e-05	X	X	X	X
258	5.3e-05	1	0.000198	3	0	0	1.79769e+308	2	NP_001162827.1;NP_651950.3	NP_001162827.1	gigyf, isoform G [Drosophila melanogaster]	CG11148	CG11148	2	8	8	2	0	8	3.75	5.299e-05	3	6	6	3	0	6	3.49	0.00018164	6	11	11	6	0	11	7.75	0.00019716	6	9	9	6	0	9	8.07	0.00021416	X	X	X	X
259	5.2e-05	1	0.000156	3	0	0	1.79769e+308	1	NP_608738.1	NP_608738.1	uncharacterized protein CG3542 [Drosophila melanogaster]	CG3542	CG3542	1	4	4	1	0	4	2.11	5.174e-05	1	4	4	1	0	4	2.11	0.00023648	4	4	4	4	0	4	9.43	0.00014001	1	2	2	1	0	2	2.11	9.294e-05	X	X	X	X
260	5.1e-05	1	0.000202	3	0	0	1.79769e+308	1	NP_477224.1	NP_477224.1	dihydroorotate dehydrogenase, isoform A [Drosophila melanogaster]	CG9741	Dhod	1	2	2	1	0	2	3.46	5.149e-05	1	2	2	1	0	2	8.15	0.00023531	2	4	4	2	0	4	8.4	0.00027863	1	1	1	1	0	1	3.7	9.248e-05	X	X	X	X
261	5.1e-05	1	8.7e-05	3	0	0	1.79769e+308	1	NP_651044.1	NP_651044.1	uncharacterized protein CG12499 [Drosophila melanogaster]	CG12499	CG12499	2	10	10	2	0	10	1.12	5.064e-05	3	4	4	3	0	4	1.75	9.257e-05	6	11	11	6	0	11	4.66	0.00015072	1	1	1	1	0	1	0.58	1.819e-05	X	X	X	X
262	5e-05	1	0.000427	3	0	0	1.79769e+308	3	NP_001162797.1;NP_001162798.1;NP_728264.1	NP_001162797.1	Gamma-tubulin ring protein 84, isoform D [Drosophila melanogaster]	CG3917	Grip84	1	4	4	1	0	4	2.52	5.007e-05	2	8	8	2	0	8	4.68	0.00045763	8	15	15	8	0	15	14.77	0.00050801	5	7	7	5	0	7	9.12	0.00031474	X	X	X	X
263	5e-05	1	0.000378	3	0	0	1.79769e+308	1	NP_523810.2	NP_523810.2	quaking related 58E-2, isoform A [Drosophila melanogaster]	CG5821	qkr58E-2	1	2	2	1	0	2	3.85	5.013e-05	2	4	4	2	0	4	5.05	0.00045818	1	2	2	1	0	2	2.64	0.00013563	4	6	6	4	0	6	10.82	0.00054021	X	X	X	X
264	5e-05	1	0.000282	3	0	0	1.79769e+308	3	NP_001285412.1;NP_001285413.1;NP_573313.2	NP_001285412.1	Rab11 interacting protein, isoform D [Drosophila melanogaster]	CG6606	Rip11	2	4	4	2	0	4	3.75	5.049e-05	3	6	6	3	0	6	6.9	0.00034613	6	8	8	6	0	8	11.5	0.00027324	3	5	5	3	0	5	7.99	0.00022672	X	X	X	X
265	5e-05	1	9.4e-05	3	0	0	1.79769e+308	1	NP_001014610.1	NP_001014610.1	GST-containing FLYWCH zinc-finger protein, isoform B [Drosophila melanogaster]	CG33546	gfzf	2	5	5	2	0	5	2.87	4.989e-05	3	3	3	3	0	3	5.26	0.0001368	2	4	4	2	0	4	3.92	0.00010799	1	1	1	1	0	1	1.53	3.584e-05	X	X	X	X
266	4.8e-05	1	0.000398	3	0	0	1.79769e+308	5	NP_001189082.1;NP_001261706.1;NP_001287028.1;NP_001287029.1;NP_648454.1	NP_001189082.1	uncharacterized protein CG42671, isoform F [Drosophila melanogaster]	CG42671	CG42671	2	6	6	2	0	6	2.92	4.808e-05	3	7	7	3	0	7	5	0.00025639	5	10	10	5	0	10	9.61	0.00021685	12	25	25	12	0	25	18.14	0.00071972	X	X	X	X
267	4.5e-05	1	0.000243	3	0	0	1.79769e+308	1	NP_524919.2	NP_524919.2	Gamma-tubulin ring protein 91 [Drosophila melanogaster]	CG10988	Grip91	1	4	4	1	0	4	1.31	4.548e-05	1	2	2	1	0	2	1.31	0.00010393	7	11	11	7	0	11	11.56	0.00033842	4	7	7	4	0	7	7.2	0.00028591	X	X	X	X
268	4.5e-05	1	0.00017	3	0	0	1.79769e+308	1	NP_609533.1	NP_609533.1	uncharacterized protein CG12264 [Drosophila melanogaster]	CG12264	CG12264	1	2	2	1	0	2	4.76	4.514e-05	1	1	1	1	0	1	3.03	0.00010314	3	4	4	3	0	4	10.17	0.00024426	1	2	2	1	0	2	4.11	0.00016214	X	X	X	X
269	4.5e-05	1	6.5e-05	3	0	0	1.79769e+308	6	NP_001097188.1;NP_001097190.2;NP_001260683.1;NP_001260684.1;NP_001260686.1;NP_724384.1	NP_001097188.1	uncharacterized protein CG42748, isoform D [Drosophila melanogaster]	CG42748	CG42748	2	7	7	2	0	7	1.71	4.453e-05	2	2	2	2	0	2	2.38	5.815e-05	1	4	4	1	0	4	1.71	6.885e-05	2	3	3	2	0	3	2.38	6.856e-05	X	X	X	X
270	4.4e-05	1	0.000853	3	0	0	1.79769e+308	1	NP_476804.1	NP_476804.1	gamma-Tubulin at 23C [Drosophila melanogaster]	CG3157	gammaTub23C	1	2	2	1	0	2	6.11	4.39e-05	4	6	6	4	0	6	10.95	0.00060191	8	21	21	8	0	21	37.47	0.00124725	5	9	9	5	0	9	24.84	0.00070966	X	X	X	X
271	4.3e-05	1	0.000182	3	0	0	1.79769e+308	4	NP_001286411.1;NP_001286412.1;NP_610941.1;NP_725369.1	NP_001286411.1	optic atrophy 1, isoform C [Drosophila melanogaster]	CG8479	Opa1	1	4	4	1	0	4	1.86	4.304e-05	2	6	6	2	0	6	4.33	0.00029505	4	6	6	4	0	6	7.22	0.00017468	2	2	2	2	0	2	4.33	7.73e-05	X	X	X	X
272	4.2e-05	1	8.6e-05	3	0	0	1.79769e+308	3	NP_001138118.2;NP_001263047.1;NP_733258.4	NP_001138118.2	sponge, isoform D [Drosophila melanogaster]	CG31048	spg	2	8	8	2	0	8	1.3	4.166e-05	1	1	1	1	0	1	0.85	2.38e-05	6	10	10	6	0	10	5.44	0.00014092	4	5	5	4	0	5	2.9	9.354e-05	X	X	X	X
273	4.2e-05	1	4.7e-05	3	0	0	1.79769e+308	3	NP_001014591.1;NP_001262078.1;NP_649154.2	NP_001014591.1	Mi-2, isoform B [Drosophila melanogaster]	CG8103	Mi-2	4	8	8	4	0	8	2.62	4.206e-05	1	1	1	1	0	1	0.61	2.403e-05	2	3	3	2	0	3	1.66	4.268e-05	2	4	4	2	0	4	1.56	7.555e-05	X	X	X	X
274	4.1e-05	1	0.00019	3	0	0	1.79769e+308	1	NP_477347.1	NP_477347.1	Srp54 [Drosophila melanogaster]	CG4602	Srp54	1	2	2	1	0	2	2.92	4.065e-05	1	1	1	1	0	1	2.92	9.289e-05	2	6	6	2	0	6	6.63	0.00032996	1	2	2	1	0	2	2.92	0.00014602	X	X	X	X
275	4e-05	1	8.2e-05	3	0	0	1.79769e+308	1	NP_523781.2	NP_523781.2	Dodeca-satellite-binding protein 1, isoform G [Drosophila melanogaster]	CG5170	Dp1	3	5	5	3	0	5	3.54	4.007e-05	1	1	1	1	0	1	1.61	3.663e-05	4	7	7	4	0	7	6.92	0.00015179	1	2	2	1	0	2	1.61	5.758e-05	X	X	X	X
276	4e-05	1	7.4e-05	3	0	0	1.79769e+308	1	NP_001027580.1	NP_001027580.1	kayak, isoform D [Drosophila melanogaster]	CG33956	kay	2	4	2	1	2	2.8	3.32	4.043e-05	2	4	0	0	4	2	3.74	0.000132	1	2	0	0	2	1	2.35	3.907e-05	2	2	0	0	2	1	3.88	5.188e-05	X	X	X	X
277	3.9e-05	1	0.000249	3	0	0	1.79769e+308	1	NP_524850.2	NP_524850.2	lodestar [Drosophila melanogaster]	CG2684	lds	2	4	4	2	0	4	2.07	3.931e-05	4	6	6	4	0	6	7.54	0.00026947	4	10	10	4	0	10	6.79	0.0002659	3	6	6	3	0	6	3.11	0.00021181	X	X	X	X
278	3.9e-05	1	0.000106	3	0	0	1.79769e+308	2	NP_524332.2;NP_731737.1	NP_524332.2	putative achaete scute target 1, isoform B [Drosophila melanogaster]	CG6148	Past1	1	2	2	1	0	2	1.5	3.905e-05	1	1	1	1	0	1	2.62	8.923e-05	3	3	3	3	0	3	11.42	0.00015849	1	1	1	1	0	1	3.18	7.014e-05	X	X	X	X
279	3.6e-05	1	0.000181	3	0	0	1.79769e+308	4	NP_001163627.1;NP_001247129.1;NP_001247130.1;NP_732105.2	NP_001163627.1	mini spindles, isoform B [Drosophila melanogaster]	CG5000	msps	5	7	7	5	0	7	4.24	3.56e-05	5	7	7	5	0	7	4.05	0.00016271	9	17	17	9	0	17	8.15	0.00023395	5	8	8	5	0	8	4	0.00014616	X	X	X	X
280	3.6e-05	1	0.00016	3	0	0	1.79769e+308	2	NP_001189230.1;NP_524373.1	NP_001189230.1	moira, isoform B [Drosophila melanogaster]	CG18740	mor	1	4	4	1	0	4	1.66	3.642e-05	5	8	8	5	0	8	4.89	0.00033293	2	2	2	2	0	2	2.01	4.928e-05	3	3	3	3	0	3	4.89	9.813e-05	X	X	X	X
281	3.5e-05	1	6e-05	3	0	0	1.79769e+308	5	NP_001188890.1;NP_001188891.1;NP_001246218.1;NP_610458.2;NP_665880.2	NP_001188890.1	uncharacterized protein CG18659, isoform C [Drosophila melanogaster]	CG18659	CG18659	1	3	3	1	0	3	2.23	3.487e-05	2	2	2	2	0	2	4.12	0.00010625	1	1	1	1	0	1	2.12	3.145e-05	1	1	1	1	0	1	2.23	4.176e-05	X	X	X	X
282	3.4e-05	1	0.000331	3	0	0	1.79769e+308	1	NP_652145.1	NP_652145.1	glucosidase 2 alpha subunit, isoform B [Drosophila melanogaster]	CG14476	GCS2alpha	2	3	3	2	0	3	2.92	3.385e-05	5	10	10	5	0	10	8.55	0.00051571	3	5	5	3	0	5	3.9	0.00015266	6	8	8	6	0	8	11.15	0.00032428	X	X	X	X
283	3.4e-05	1	0.000281	3	0	0	1.79769e+308	2	NP_001246665.1;NP_648206.1	NP_001246665.1	uncharacterized protein CG7185, isoform B [Drosophila melanogaster]	CG7185	CG7185	1	2	2	1	0	2	4.13	3.447e-05	1	5	5	1	0	5	4.13	0.00039381	2	7	7	2	0	7	6.78	0.00032641	2	2	2	2	0	2	6.78	0.00012382	X	X	X	X
284	3.3e-05	1	6.1e-05	3	0	0	1.79769e+308	2	NP_001189222.1;NP_731964.2	NP_001189222.1	uncharacterized protein CG42788, isoform C [Drosophila melanogaster]	CG42788	CG42788	3	5	5	3	0	5	2.57	3.344e-05	3	4	4	3	0	4	3.14	0.00012226	1	2	2	1	0	2	1.67	3.619e-05	1	1	1	1	0	1	1.67	2.402e-05	X	X	X	X
285	3.2e-05	1	0.000446	3	0	0	1.79769e+308	1	NP_523400.1	NP_523400.1	coat protein (coatomer) beta [Drosophila melanogaster]	CG6223	betaCOP	3	3	3	3	0	3	4.05	3.245e-05	3	5	5	3	0	5	4.88	0.00024715	8	24	24	8	0	24	12.24	0.00070236	5	10	10	5	0	10	9.85	0.00038853	X	X	X	X
286	3.2e-05	1	0.000142	3	0	0	1.79769e+308	1	NP_650592.1	NP_650592.1	protein associated with topo II related - 1, isoform A [Drosophila melanogaster]	CG5208	Patr-1	2	3	3	2	0	3	2.07	3.231e-05	1	1	1	1	0	1	1.96	4.923e-05	2	5	5	2	0	5	4.55	0.00014572	3	6	6	3	0	6	6.92	0.00023215	X	X	X	X
287	3.2e-05	1	7.2e-05	3	0	0	1.79769e+308	2	NP_001162796.1;NP_523408.2	NP_001162796.1	pacman, isoform B [Drosophila melanogaster]	CG3291	pcm	1	5	5	1	0	5	0.99	3.232e-05	1	1	1	1	0	1	1.98	2.954e-05	2	4	4	2	0	4	2.98	6.996e-05	3	5	5	3	0	5	3.6	0.0001161	X	X	X	X
288	3.1e-05	1	0.000101	3	0	0	1.79769e+308	3	NP_001247280.1;NP_001262904.1;NP_788733.1	NP_001247280.1	multiple ankyrin repeats single KH domain, isoform C [Drosophila melanogaster]	CG33106	mask	5	12	12	5	0	12	2.44	3.12e-05	3	5	5	3	0	5	1.75	5.942e-05	8	16	16	8	0	16	4.26	0.00011256	7	14	14	7	0	14	4.11	0.00013076	X	X	X	X
289	3e-05	1	0.000298	3	0	0	1.79769e+308	7	NP_001163164.1;NP_001246353.1;NP_001246354.1;NP_523753.1;NP_725501.2;NP_725502.1;NP_995847.1	NP_001163164.1	Myelodysplasia/myeloid leukemia factor, isoform E [Drosophila melanogaster]	CG8295	Mlf	1	1	1	1	0	1	4.58	2.987e-05	2	3	3	2	0	3	7.45	0.00040961	1	2	2	1	0	2	2.87	0.00016167	2	3	3	2	0	3	7.45	0.00032196	X	X	X	X
290	3e-05	1	0.000133	3	0	0	1.79769e+308	1	NP_649767.1	NP_649767.1	uncharacterized protein CG7878 [Drosophila melanogaster]	CG7878	CG7878	2	6	2	1	4	2.02454	3.27	3.003e-05	3	4	2	2	2	2.02614	7.4	0.00013734	4	7	5	3	2	5.13514	11.95	0.00020607	2	3	1	1	2	1.06452	5.12	5.672e-05	X	X	X	X
291	2.7e-05	1	0.000243	3	0	0	1.79769e+308	5	NP_001285330.1;NP_001285331.1;NP_524959.1;NP_727982.1;NP_996487.1	NP_001285330.1	eukaryotic translation initiation factor 4H1, isoform D [Drosophila melanogaster]	CG4429	Rbp2	1	1	1	1	0	1	6.7	2.687e-05	1	1	1	1	0	1	6.7	0.00012281	2	7	7	2	0	7	9.54	0.00050897	1	1	1	1	0	1	6.7	9.653e-05	X	X	X	X
292	2.7e-05	1	0.000174	3	0	0	1.79769e+308	1	NP_787123.1	NP_787123.1	ankyrin, isoform C [Drosophila melanogaster]	CG1651	Ank	2	4	4	2	0	4	2.13	2.692e-05	2	5	5	2	0	5	2.71	0.00015381	2	3	3	2	0	3	3.16	5.464e-05	7	13	13	7	0	13	9.62	0.00031434	X	X	X	X
293	2.7e-05	1	2.6e-05	3	0	0	1.79769e+308	1	NP_609369.1	NP_609369.1	ubiquitin fusion-degradation 4-like [Drosophila melanogaster]	CG5604	CG5604	2	7	7	2	0	7	1.65	2.676e-05	2	3	3	2	0	3	1.21	5.242e-05	1	1	1	1	0	1	0.77	1.035e-05	1	1	1	1	0	1	0.81	1.373e-05	X	X	X	X
294	2.7e-05	1	2.5e-05	3	0	0	1.79769e+308	1	NP_611676.1	NP_611676.1	uncharacterized protein CG4554 [Drosophila melanogaster]	CG4554	CG4554	4	7	7	4	0	7	1.98	2.67e-05	2	3	3	2	0	3	1.32	5.231e-05	1	1	1	1	0	1	0.59	1.032e-05	1	1	1	1	0	1	0.73	1.37e-05	X	X	X	X
295	2.7e-05	1	2.4e-05	3	0	0	1.79769e+308	1	NP_477190.1	NP_477190.1	viking, isoform A [Drosophila melanogaster]	CG16858	vkg	2	5	5	2	0	5	1.44	2.687e-05	1	1	1	1	0	1	0.62	2.456e-05	1	2	2	1	0	2	0.72	2.908e-05	1	1	1	1	0	1	0.72	1.931e-05	X	X	X	X
296	2.5e-05	1	0.0003	3	0	0	1.79769e+308	2	NP_001262153.1;NP_649305.1	NP_001262153.1	uncharacterized protein CG7324, isoform B [Drosophila melanogaster]	CG7324	CG7324	1	3	3	1	0	3	1.35	2.49e-05	4	6	6	4	0	6	5.81	0.00022763	5	10	10	5	0	10	8.44	0.00022461	6	15	15	6	0	15	10.59	0.0004473	X	X	X	X
297	2.5e-05	1	0.000138	3	0	0	1.79769e+308	1	NP_609013.1	NP_609013.1	Pez, isoform A [Drosophila melanogaster]	CG9493	Pez	2	3	3	2	0	3	2.32	2.498e-05	2	2	2	2	0	2	2.24	7.612e-05	4	7	7	4	0	7	5.03	0.00015773	3	6	6	3	0	6	4.39	0.00017949	X	X	X	X
298	2.5e-05	1	0.000105	3	0	0	1.79769e+308	1	NP_525036.2	NP_525036.2	Retinoblastoma-family protein [Drosophila melanogaster]	CG7413	Rbf	1	2	2	1	0	2	1.18	2.468e-05	2	3	3	2	0	3	5.21	0.00016918	2	3	3	2	0	3	5.44	0.00010016	1	1	1	1	0	1	3.2	4.432e-05	X	X	X	X
299	2.3e-05	1	0.000643	3	0	0	1.79769e+308	1	NP_572324.1	NP_572324.1	uncharacterized protein CG3342 [Drosophila melanogaster]	CG3342	CG3342	1	1	1	1	0	1	2.65	2.302e-05	1	2	2	1	0	2	5.74	0.00021038	4	9	9	4	0	9	16.78	0.00056049	6	14	14	6	0	14	22.08	0.00115753	X	X	X	X
300	2.3e-05	1	0.000314	3	0	0	1.79769e+308	1	NP_572662.1	NP_572662.1	uncharacterized protein CG1637, isoform C [Drosophila melanogaster]	CG1637	CG1637	1	1	1	1	0	1	2.89	2.317e-05	2	3	3	2	0	3	4.44	0.00031767	2	2	2	2	0	2	6.89	0.00012538	3	6	6	3	0	6	8	0.00049939	X	X	X	X
301	2.3e-05	1	0.000267	3	0	0	1.79769e+308	3	NP_001259588.1;NP_727910.1;NP_727911.1	NP_001259588.1	shibire, isoform N [Drosophila melanogaster]	CG18102	shi	1	2	2	1	0	2	1.23	2.327e-05	2	4	4	2	0	4	3.79	0.00021273	10	16	16	10	0	16	18.97	0.00050378	2	2	2	2	0	2	4.91	8.36e-05	X	X	X	X
302	2.3e-05	1	0.000132	3	0	0	1.79769e+308	5	NP_001247002.1;NP_001262404.1;NP_731314.1;NP_731316.2;NP_788604.1	NP_001247002.1	pumilio, isoform F [Drosophila melanogaster]	CG9755	pum	1	2	2	1	0	2	1.62	2.254e-05	1	2	2	1	0	2	1.62	0.00010303	3	3	3	3	0	3	4.97	9.15e-05	3	5	5	3	0	5	4.97	0.00020246	X	X	X	X
303	2.3e-05	1	0.000106	3	0	0	1.79769e+308	4	NP_001262126.1;NP_001262127.1;NP_001262128.1;NP_649261.1	NP_001262126.1	HP1 and insulator partner protein 1, isoform B [Drosophila melanogaster]	CG3680	HIPP1	1	2	2	1	0	2	1.08	2.257e-05	2	3	3	2	0	3	3.9	0.00015471	3	4	4	3	0	4	4.55	0.00012213	1	1	1	1	0	1	1.08	4.053e-05	X	X	X	X
304	2.2e-05	1	8e-05	3	0	0	1.79769e+308	8	NP_001261427.1;NP_001261428.1;NP_001261429.1;NP_001261430.1;NP_001261431.1;NP_001261432.1;NP_523929.2;NP_729034.2	NP_001261427.1	dynein heavy chain 64C, isoform D [Drosophila melanogaster]	CG7507	Dhc64C	5	10	10	5	0	10	1.85	2.242e-05	1	1	1	1	0	1	0.37	1.025e-05	20	34	34	20	0	34	7.85	0.00020623	2	3	3	2	0	3	0.88	2.416e-05	X	X	X	X
305	2.1e-05	1	3.8e-05	3	0	0	1.79769e+308	1	NP_650303.1	NP_650303.1	oocyte maintenance defects, isoform A [Drosophila melanogaster]	CG9591	omd	1	2	2	1	0	2	1.51	2.098e-05	1	1	1	1	0	1	1.51	4.794e-05	1	1	1	1	0	1	1.91	2.838e-05	1	1	1	1	0	1	1.71	3.768e-05	X	X	X	X
306	2e-05	1	6.8e-05	3	0	0	1.79769e+308	1	NP_001036437.1	NP_001036437.1	integrator 3 [Drosophila melanogaster]	CG17665	IntS3	1	2	2	1	0	2	1.03	1.952e-05	2	2	2	2	0	2	2.43	8.923e-05	3	3	3	3	0	3	3.56	7.925e-05	1	1	1	1	0	1	0.84	3.507e-05	X	X	X	X
307	1.9e-05	1	0.000168	3	0	0	1.79769e+308	1	NP_477042.1	NP_477042.1	clathrin heavy chain, isoform A [Drosophila melanogaster]	CG9012	Chc	2	3	3	2	0	3	1.73	1.864e-05	2	2	2	2	0	2	2.62	5.68e-05	6	8	8	6	0	8	7.03	0.0001345	8	14	14	8	0	14	8.7	0.00031249	X	X	X	X
308	1.9e-05	1	7.5e-05	3	0	0	1.79769e+308	2	NP_001137752.1;NP_726441.1	NP_001137752.1	Sterile20-like kinase, isoform F [Drosophila melanogaster]	CG4527	Slik	2	3	3	2	0	3	1.77	1.913e-05	2	5	5	2	0	5	2.08	0.00014572	1	2	2	1	0	2	1.35	3.451e-05	2	2	2	2	0	2	1.83	4.582e-05	X	X	X	X
309	1.9e-05	1	5.8e-05	3	0	0	1.79769e+308	1	NP_523571.1	NP_523571.1	crinkled, isoform B [Drosophila melanogaster]	CG7595	ck	1	4	4	1	0	4	0.83	1.925e-05	1	1	1	1	0	1	0.69	2.199e-05	5	9	9	5	0	9	4.43	0.00011717	1	2	2	1	0	2	0.83	3.457e-05	X	X	X	X
310	1.9e-05	1	5e-05	3	0	0	1.79769e+308	1	NP_523743.1	NP_523743.1	RNA polymerase I subunit [Drosophila melanogaster]	CG10122	RpI1	1	3	3	1	0	3	1.04	1.905e-05	1	2	2	1	0	2	1.22	5.804e-05	3	4	4	3	0	4	4.38	6.872e-05	1	1	1	1	0	1	1.4	2.281e-05	X	X	X	X
311	1.6e-05	1	0.000281	3	0	0	1.79769e+308	2	NP_001246798.1;NP_730192.2	NP_001246798.1	lasp, isoform C [Drosophila melanogaster]	CG3849	Lasp	1	1	1	1	0	1	5.66	1.639e-05	2	3	3	2	0	3	4.72	0.00022477	4	6	6	4	0	6	11.95	0.00026615	4	6	6	4	0	6	10.38	0.00035334	X	X	X	X
312	1.6e-05	1	8.1e-05	3	0	0	1.79769e+308	1	NP_609237.1	NP_609237.1	uncharacterized protein CG13097 [Drosophila melanogaster]	CG13097	CG13097	1	1	1	1	0	1	2.11	1.575e-05	1	2	2	1	0	2	1.81	0.00014396	1	1	1	1	0	1	4.83	4.262e-05	1	1	1	1	0	1	1.81	5.658e-05	X	X	X	X
313	1.6e-05	1	4.1e-05	3	0	0	1.79769e+308	2	NP_001097002.1;NP_573136.3	NP_001097002.1	nucleoporin 153kD, isoform D [Drosophila melanogaster]	CG4453	Nup153	1	3	3	1	0	3	0.62	1.621e-05	1	2	2	1	0	2	0.83	4.941e-05	1	1	1	1	0	1	0.93	1.462e-05	2	3	3	2	0	3	2.07	5.825e-05	X	X	X	X
314	1.6e-05	1	3.8e-05	3	0	0	1.79769e+308	2	NP_001260385.1;NP_609505.1	NP_001260385.1	discs large 5, isoform D [Drosophila melanogaster]	CG6509	CG6509	1	3	3	1	0	3	0.57	1.633e-05	1	2	2	1	0	2	0.57	4.977e-05	2	3	3	2	0	3	1.25	4.42e-05	1	1	1	1	0	1	0.57	1.956e-05	X	X	X	X
315	1.5e-05	1	7.4e-05	3	0	0	1.79769e+308	1	NP_648050.1	NP_648050.1	uncharacterized protein CG8368, isoform A [Drosophila melanogaster]	CG8368	CG8368	1	1	1	1	0	1	2.2	1.531e-05	1	1	1	1	0	1	1.91	6.997e-05	1	1	1	1	0	1	3.52	4.143e-05	1	2	2	1	0	2	3.52	0.00011	X	X	X	X
316	1.5e-05	1	3.4e-05	3	0	0	1.79769e+308	7	NP_001163305.1;NP_001261187.1;NP_001261188.1;NP_001261189.1;NP_728505.1;NP_728507.1;NP_995946.1	NP_001163305.1	enhancer of bithorax, isoform F [Drosophila melanogaster]	CG32346	E(bx)	2	3	3	2	0	3	1.64	1.462e-05	1	2	2	1	0	2	1.5	4.455e-05	1	3	3	1	0	3	1.5	3.957e-05	1	1	1	1	0	1	1.5	1.751e-05	X	X	X	X
317	1.4e-05	1	0.000179	3	0	0	1.79769e+308	3	NP_001287414.1;NP_001287416.1;NP_650844.1	NP_001287414.1	Rho GTPase activating protein at 92B, isoform B [Drosophila melanogaster]	CG4755	RhoGAP92B	1	1	1	1	0	1	1.08	1.411e-05	2	3	3	2	0	3	2.57	0.00019344	2	5	5	2	0	5	3.79	0.00019088	2	3	3	2	0	3	4.74	0.00015205	X	X	X	X
318	1.4e-05	1	9e-05	3	0	0	1.79769e+308	1	NP_648781.1	NP_648781.1	uncharacterized protein CG12301 [Drosophila melanogaster]	CG12301	CG12301	1	1	1	1	0	1	1.56	1.352e-05	1	1	1	1	0	1	1.56	6.18e-05	3	3	3	3	0	3	6.74	0.00010977	2	2	2	2	0	2	4.02	9.716e-05	X	X	X	X
319	1.2e-05	1	0.000462	3	0	0	1.79769e+308	1	NP_525105.2	NP_525105.2	eukaryotic translation elongation factor 2, isoform A [Drosophila melanogaster]	CG2238	EF2	1	1	1	1	0	1	2.73	1.235e-05	4	6	6	4	0	6	6.99	0.00033875	12	26	26	12	0	26	23.93	0.00086908	3	4	4	3	0	4	5.45	0.00017751	X	X	X	X
320	1.1e-05	1	4.1e-05	3	0	0	1.79769e+308	1	NP_651962.2	NP_651962.2	Spt6, isoform A [Drosophila melanogaster]	CG12225	Spt6	1	2	2	1	0	2	0.71	1.139e-05	1	2	2	1	0	2	0.71	5.205e-05	2	2	2	2	0	2	2.29	3.082e-05	2	2	2	2	0	2	1.64	4.091e-05	X	X	X	X
321	1.1e-05	1	1.4e-05	3	0	0	1.79769e+308	1	NP_525064.1	NP_525064.1	lava lamp, isoform C [Drosophila melanogaster]	CG6450	lva	3	3	3	3	0	3	1.51	1.126e-05	1	1	1	1	0	1	0.61	1.715e-05	1	1	1	1	0	1	0.68	1.015e-05	1	1	1	1	0	1	0.43	1.348e-05	X	X	X	X
322	1e-05	1	7.9e-05	3	0	0	1.79769e+308	3	NP_001286796.1;NP_476832.1;NP_726381.1	NP_001286796.1	Sarco/endoplasmic reticulum Ca(2+)-ATPase, isoform I [Drosophila melanogaster]	CG3725	SERCA	1	1	1	1	0	1	1.2	1.044e-05	2	3	3	2	0	3	2.8	0.0001431	1	2	2	1	0	2	1.3	5.648e-05	1	1	1	1	0	1	1.5	3.749e-05	X	X	X	X
323	1e-05	1	2.5e-05	3	0	0	1.79769e+308	9	NP_001246570.1;NP_001246572.1;NP_001246573.1;NP_001246574.1;NP_001246575.1;NP_001246577.1;NP_001246578.1;NP_001286921.1;NP_536777.3	NP_001246570.1	spinophilin, isoform B [Drosophila melanogaster]	CG16757	Spn	2	2	2	2	0	2	1.22	9.77e-06	1	2	2	1	0	2	0.89	4.466e-05	1	1	1	1	0	1	0.75	1.322e-05	1	1	1	1	0	1	0.89	1.755e-05	X	X	X	X
324	8e-06	1	0.000145	3	0	0	1.79769e+308	2	NP_001261588.1;NP_648238.1	NP_001261588.1	rhea, isoform H [Drosophila melanogaster]	CG6831	rhea	2	2	2	2	0	2	1.93	7.75e-06	2	3	3	2	0	3	1.34	5.316e-05	4	6	6	4	0	6	3.2	6.295e-05	12	23	23	12	0	23	8.37	0.00032036	X	X	X	X
325	7e-06	1	3.1e-05	3	0	0	1.79769e+308	1	NP_001286919.1	NP_001286919.1	supervillin, isoform AE [Drosophila melanogaster]	CG45186	CG45186	1	3	3	1	0	3	0.27	6.91e-06	3	8	0	0	8	4	1.1	4.211e-05	4	6	0	0	6	3	1.97	1.87e-05	4	8	0	0	8	4	1.59	3.31e-05	X	X	X	X
326	6e-06	1	8.2e-05	3	0	0	1.79769e+308	4	NP_001261906.1;NP_001261907.1;NP_536746.1;NP_730088.1	NP_001261906.1	brahma, isoform E [Drosophila melanogaster]	CG5942	brm	1	1	1	1	0	1	0.66	6.29e-06	2	3	3	2	0	3	2.41	8.622e-05	3	4	4	3	0	4	3.32	6.806e-05	2	4	4	2	0	4	1.45	9.036e-05	X	X	X	X
327	6e-06	1	4.2e-05	3	0	0	1.79769e+308	1	NP_001286916.1	NP_001286916.1	supervillin, isoform AB [Drosophila melanogaster]	CG45186	CG45186	2	2	2	2	0	2	0.92	6.21e-06	3	8	0	0	8	4	1.49	5.674e-05	4	6	0	0	6	3	2.65	2.52e-05	4	8	0	0	8	4	2.14	4.46e-05	X	X	X	X
328	5e-06	1	2.6e-05	3	0	0	1.79769e+308	5	NP_001163599.2;NP_001247080.1;NP_001247081.1;NP_650250.4;NP_731761.3	NP_001163599.2	uncharacterized protein CG7518, isoform I [Drosophila melanogaster]	CG7518	CG7518	1	1	1	1	0	1	0.95	4.51e-06	1	1	1	1	0	1	0.78	2.063e-05	2	2	2	2	0	2	1.99	2.443e-05	2	2	2	2	0	2	1.17	3.243e-05	X	X	X	X
329	4e-06	1	4.4e-05	3	0	0	1.79769e+308	1	NP_001015316.1	NP_001015316.1	uncharacterized protein CG17514, isoform A [Drosophila melanogaster]	CG17514	CG17514	1	1	1	1	0	1	0.42	3.96e-06	2	4	4	2	0	4	1.18	7.247e-05	2	3	3	2	0	3	2.13	3.218e-05	1	2	2	1	0	2	0.61	2.848e-05	X	X	X	X
330	4e-06	1	3.9e-05	3	0	0	1.79769e+308	3	NP_001260883.1;NP_476723.1;NP_995813.1	NP_001260883.1	schnurri, isoform F [Drosophila melanogaster]	CG7734	shn	1	1	1	1	0	1	0.39	4.03e-06	1	1	1	1	0	1	0.93	1.842e-05	3	5	5	3	0	5	2.24	5.453e-05	2	3	3	2	0	3	1.2	4.343e-05	X	X	X	X
331	0.003745	1	0.004985	2	0	0	1.79769e+308	1	NP_524352.1	NP_524352.1	histone H4 replacement, isoform C [Drosophila melanogaster]	CG3379	His4r	7	37	37	7	0	37	51.46	0.00374535	8	18	18	8	0	18	53.4	0.0083274	3	6	6	3	0	6	30.1	0.00164339	X	X	X	X	X	X	X	X	X	X	X	X
332	0.002616	1	0.001602	2	0	0	1.79769e+308	11	NP_001097982.1;NP_001163775.1;NP_001189319.1;NP_001247371.1;NP_001247372.1;NP_001263111.1;NP_001263112.1;NP_477031.1;NP_477032.1;NP_733382.1;NP_733385.1	NP_001097982.1	tropomodulin, isoform G [Drosophila melanogaster]	CG1539	tmod	10	132	132	10	0	132	27	0.00261647	12	33	33	12	0	33	27.57	0.00298952	2	4	4	2	0	4	8.17	0.00021454	X	X	X	X	X	X	X	X	X	X	X	X
333	0.002571	1	0.003687	2	0	0	1.79769e+308	1	NP_536744.2	NP_536744.2	mitochondrial single stranded DNA-binding protein [Drosophila melanogaster]	CG4337	mtSSB	4	36	36	4	0	36	31.51	0.00257085	3	22	22	3	0	22	26.03	0.00718032	1	1	1	1	0	1	6.16	0.00019323	X	X	X	X	X	X	X	X	X	X	X	X
334	0.001718	1	0.001826	2	0	0	1.79769e+308	3	NP_001260742.1;NP_001260743.1;NP_610242.1	NP_001260742.1	coro, isoform D [Drosophila melanogaster]	CG9446	coro	8	88	88	8	0	88	23.6	0.00171818	7	35	35	7	0	35	24.16	0.00312321	3	10	10	3	0	10	14.79	0.00052831	X	X	X	X	X	X	X	X	X	X	X	X
335	0.001587	1	0.001849	2	0	0	1.79769e+308	2	NP_524858.1;NP_996118.1	NP_524858.1	protein on ecdysone puffs, isoform B [Drosophila melanogaster]	CG6143	Pep	11	109	109	11	0	109	18.85	0.00158724	13	52	52	13	0	52	25.84	0.0034607	2	6	6	2	0	6	4.89	0.00023641	X	X	X	X	X	X	X	X	X	X	X	X
337	0.001481	1	0.016267	2	0	0	1.79769e+308	1	NP_611965.2	NP_611965.2	epidermal growth factor receptor pathway substrate clone 15, isoform A [Drosophila melanogaster]	CG16932	Eps-15	34	356	0	0	356	178	40.54	0.00148114	36	187	0	0	187	0	42.54	X	51	659	108	2	551	659	56.19	0.0148375	59	592	84	2	508	592	57.22	0.0176959	X	X	X	X
338	0.001441	1	0.001688	2	0	0	1.79769e+308	1	NP_650120.1	NP_650120.1	glorund, isoform A [Drosophila melanogaster]	CG6946	glo	7	81	81	7	0	81	16.21	0.00144117	8	35	35	8	0	35	19.97	0.00284606	4	11	11	4	0	11	12.46	0.00052957	X	X	X	X	X	X	X	X	X	X	X	X
340	0.000821	1	0.000632	2	0	0	1.79769e+308	1	NP_524714.1	NP_524714.1	hoi-polloi, isoform A [Drosophila melanogaster]	CG3949	hoip	1	10	10	1	0	10	11.81	0.00082096	1	1	1	1	0	1	11.81	0.00037521	2	4	4	2	0	4	33.86	0.00088855	X	X	X	X	X	X	X	X	X	X	X	X
341	0.000757	1	0.001337	2	0	0	1.79769e+308	1	NP_524774.1	NP_524774.1	small ribonucleoprotein particle protein SmD1 [Drosophila melanogaster]	CG10753	SmD1	1	9	9	1	0	9	16.13	0.00075674	1	4	4	1	0	4	16.13	0.00153714	2	5	5	2	0	5	26.61	0.00113756	X	X	X	X	X	X	X	X	X	X	X	X
342	0.000638	1	0.000992	2	0	0	1.79769e+308	1	NP_524868.1	NP_524868.1	vulcan, isoform A [Drosophila melanogaster]	CG8390	vlc	7	37	37	7	0	37	18.51	0.00063764	7	24	24	7	0	24	21.82	0.0018903	1	2	2	1	0	2	2.48	9.326e-05	X	X	X	X	X	X	X	X	X	X	X	X
343	0.000606	1	0.000576	2	0	0	1.79769e+308	1	NP_573082.1	NP_573082.1	uncharacterized protein CG8578, isoform A [Drosophila melanogaster]	CG8578	CG8578	7	23	23	7	0	23	21.21	0.00060556	5	8	8	5	0	8	18.94	0.00096265	X	X	X	X	X	X	X	X	1	2	2	1	0	2	5.3	0.00018916	X	X	X	X
344	0.000586	1	0.001033	2	0	0	1.79769e+308	1	NP_996384.1	NP_996384.1	uncharacterized protein CG12065, isoform D [Drosophila melanogaster]	CG12065	CG12065	9	36	36	9	0	36	26.05	0.00058556	9	27	27	9	0	27	24.34	0.00200715	X	X	X	X	X	X	X	X	1	1	1	1	0	1	3.12	5.843e-05	X	X	X	X
345	0.000568	1	0.000795	2	0	0	1.79769e+308	2	NP_001260168.1;NP_723226.1	NP_001260168.1	x16 splicing factor, isoform B [Drosophila melanogaster]	CG10203	x16	2	14	14	2	0	14	13.23	0.00056797	1	7	7	1	0	7	5.45	0.00129789	X	X	X	X	X	X	X	X	1	2	2	1	0	2	5.45	0.00029147	X	X	X	X
346	0.000553	1	0.00024	2	0	0	1.79769e+308	1	NP_608344.1	NP_608344.1	ubiquilin, isoform A [Drosophila melanogaster]	CG14224	Ubqn	5	29	29	5	0	29	19.2	0.00055276	X	X	X	X	X	X	X	X	2	4	4	2	0	4	5.48	0.0002063	2	4	4	2	0	4	6.22	0.00027389	X	X	X	X
347	0.000531	1	0.000768	2	0	0	1.79769e+308	1	NP_651969.1	NP_651969.1	Ran, isoform A [Drosophila melanogaster]	CG1404	Ran	2	11	11	2	0	11	17.59	0.00053097	2	4	4	2	0	4	10.19	0.00088243	1	5	5	1	0	5	10.19	0.00065305	X	X	X	X	X	X	X	X	X	X	X	X
348	0.000525	1	0.001573	2	0	0	1.79769e+308	1	NP_524543.1	NP_524543.1	heterogeneous nuclear ribonucleoprotein at 98DE, isoform B [Drosophila melanogaster]	CG9983	Hrb98DE	5	23	17	4	6	18.3784	14.79	0.00052498	8	27	16	5	11	19.52	20.27	0.00254836	6	11	5	3	6	7.72727	19.45	0.00059726	2	4	0	0	4	0	2.74	X	X	X	X	X
349	0.000506	1	0.000923	2	0	0	1.79769e+308	3	NP_788665.1;NP_788668.1;NP_788671.2	NP_788665.1	B52, isoform A [Drosophila melanogaster]	CG10851	B52	5	17	17	5	0	17	13.43	0.00050642	3	10	10	3	0	10	10.86	0.00136146	3	6	6	3	0	6	9.14	0.00048363	X	X	X	X	X	X	X	X	X	X	X	X
350	0.000496	1	0.000785	2	0	0	1.79769e+308	2	NP_001260579.1;NP_476712.1	NP_001260579.1	Ran GTPase activating protein, isoform C [Drosophila melanogaster]	CG9999	RanGAP	7	28	28	7	0	28	19.73	0.00049649	7	17	17	7	0	17	16.16	0.00137767	2	4	4	2	0	4	5.27	0.00019192	X	X	X	X	X	X	X	X	X	X	X	X
351	0.000463	1	0.000348	2	0	0	1.79769e+308	1	NP_476750.1	NP_476750.1	stubarista, isoform A [Drosophila melanogaster]	CG14792	sta	1	12	12	1	0	12	5.56	0.00046339	X	X	X	X	X	X	X	X	2	4	4	2	0	4	18.52	0.00041795	1	2	2	1	0	2	5.56	0.00027744	X	X	X	X
352	0.00043	1	0.000503	2	0	0	1.79769e+308	2	NP_001247302.1;NP_651361.2	NP_001247302.1	nucleoporin 358kD, isoform B [Drosophila melanogaster]	CG11856	Nup358	22	112	112	22	0	112	14.5	0.00042963	22	55	55	22	0	55	13.94	0.00096424	X	X	X	X	X	X	X	X	2	3	3	2	0	3	1.14	4.134e-05	X	X	X	X
353	0.00042	1	0.000268	2	0	0	1.79769e+308	2	NP_001260844.1;NP_476586.1	NP_001260844.1	Jun-related antigen, isoform C [Drosophila melanogaster]	CG2275	Jra	5	15	15	5	0	15	26.34	0.00042041	2	3	3	2	0	3	7.8	0.00038428	1	2	2	1	0	2	4.03	0.00015168	X	X	X	X	X	X	X	X	X	X	X	X
354	0.000403	1	0.001363	2	0	0	1.79769e+308	5	NP_001245629.1;NP_001245630.1;NP_001259462.1;NP_542940.1;NP_996415.1	NP_001245629.1	casein kinase II beta subunit, isoform I [Drosophila melanogaster]	CG15224	CkIIbeta	4	9	9	4	0	9	29.61	0.00040273	4	8	8	4	0	8	26.61	0.00163609	4	9	9	4	0	9	33.91	0.00108972	X	X	X	X	X	X	X	X	X	X	X	X
355	0.000385	1	0.000513	2	0	0	1.79769e+308	1	NP_524929.1	NP_524929.1	Mtr4 helicase [Drosophila melanogaster]	CG4152	l(2)35Df	7	39	39	7	0	39	8.82	0.00038543	9	18	18	9	0	18	11.18	0.00081301	5	8	8	5	0	8	7.3	0.00021393	X	X	X	X	X	X	X	X	X	X	X	X
356	0.000376	1	0.000683	2	0	0	1.79769e+308	1	NP_477356.1	NP_477356.1	dynein light chain 90F [Drosophila melanogaster]	CG12363	Dlc90F	1	4	4	1	0	4	9.01	0.00037572	1	2	2	1	0	2	14.41	0.00085858	1	2	2	1	0	2	16.22	0.00050832	X	X	X	X	X	X	X	X	X	X	X	X
358	0.000372	1	0.000315	2	0	0	1.79769e+308	1	NP_611467.1	NP_611467.1	uncharacterized protein CG9143 [Drosophila melanogaster]	CG9143	CG9143	4	29	29	4	0	29	6.89	0.00037191	3	6	6	3	0	6	4.92	0.00035167	5	8	8	5	0	8	8.98	0.0002776	X	X	X	X	X	X	X	X	X	X	X	X
359	0.000368	1	0.001322	2	0	0	1.79769e+308	1	NP_652611.1	NP_652611.1	splicing factor 2, isoform A [Drosophila melanogaster]	CG6987	SF2	3	9	9	3	0	9	12.16	0.00036799	5	10	10	5	0	10	22.75	0.00186868	4	7	7	4	0	7	19.61	0.00077444	X	X	X	X	X	X	X	X	X	X	X	X
360	0.000367	1	0.00022	2	0	0	1.79769e+308	1	NP_573130.1	NP_573130.1	eukaryotic translation initiation factor 2 subunit alpha, isoform A [Drosophila melanogaster]	CG9946	eIF-2alpha	1	12	12	1	0	12	4.99	0.00036691	X	X	X	X	X	X	X	X	3	4	4	3	0	4	11.44	0.00033093	1	1	1	1	0	1	4.99	0.00010984	X	X	X	X
361	0.000363	1	0.001008	2	0	0	1.79769e+308	1	NP_524274.1	NP_524274.1	replication protein A 70 [Drosophila melanogaster]	CG9633	RpA-70	6	21	21	6	0	21	13.93	0.0003631	7	19	19	7	0	19	16.25	0.00150145	5	11	11	5	0	11	15.75	0.00051464	X	X	X	X	X	X	X	X	X	X	X	X
362	0.000338	1	0.000281	2	0	0	1.79769e+308	1	NP_608531.1	NP_608531.1	translocator protein [Drosophila melanogaster]	CG2789	Tspo	1	6	6	1	0	6	9.19	0.00033815	1	1	1	1	0	1	9.19	0.00025757	1	2	2	1	0	2	9.19	0.00030499	X	X	X	X	X	X	X	X	X	X	X	X
363	0.000318	1	0.000822	2	0	0	1.79769e+308	1	NP_524002.1	NP_524002.1	ribosomal protein S17 [Drosophila melanogaster]	CG3922	RpS17	1	4	4	1	0	4	10.69	0.00031836	X	X	X	X	X	X	X	X	1	1	1	1	0	1	6.11	0.00021536	3	5	5	3	0	5	28.24	0.00142955	X	X	X	X
364	0.000305	1	0.000659	2	0	0	1.79769e+308	1	NP_649169.3	NP_649169.3	translocase of outer membrane 20, isoform A [Drosophila melanogaster]	CG7654	Tom20	1	5	5	1	0	5	11.7	0.00030486	X	X	X	X	X	X	X	X	1	4	4	1	0	4	11.7	0.00065992	2	3	3	2	0	3	25.15	0.00065709	X	X	X	X
366	0.000299	1	0.000311	2	0	0	1.79769e+308	1	NP_647745.1	NP_647745.1	novel nucleolar protein 2 [Drosophila melanogaster]	CG1240	Non2	1	7	7	1	0	7	7.79	0.00029911	1	2	2	1	0	2	4.51	0.00039058	1	2	2	1	0	2	7.79	0.00023124	X	X	X	X	X	X	X	X	X	X	X	X
367	0.000288	1	9.5e-05	2	0	0	1.79769e+308	1	NP_572872.1	NP_572872.1	uncharacterized protein CG1622, isoform A [Drosophila melanogaster]	CG1622	CG1622	2	11	11	2	0	11	9.05	0.00028816	1	1	1	1	0	1	4.77	0.00011973	1	1	1	1	0	1	4.77	7.088e-05	X	X	X	X	X	X	X	X	X	X	X	X
368	0.000258	1	0.000172	2	0	0	1.79769e+308	1	NP_476833.1	NP_476833.1	dead box protein 73D [Drosophila melanogaster]	CG9680	Dbp73D	3	17	17	3	0	17	6.26	0.000258	1	2	2	1	0	2	2.18	0.00013872	3	5	5	3	0	5	7.57	0.00020532	X	X	X	X	X	X	X	X	X	X	X	X
369	0.000249	1	0.000388	2	0	0	1.79769e+308	1	NP_523415.1	NP_523415.1	adaptor protein complex 1/2, beta subunit [Drosophila melanogaster]	CG12532	AP-1-2beta	3	22	22	3	0	22	4.99	0.00024905	X	X	X	X	X	X	X	X	10	20	20	10	0	20	21.06	0.00061263	3	4	4	3	0	4	5.75	0.00016267	X	X	X	X
370	0.000244	1	0.000332	2	0	0	1.79769e+308	4	NP_001027282.1;NP_001027290.1;NP_001027369.1;NP_724341.1	NP_001027282.1	histone H1 [Drosophila melanogaster]	CG33801	His1:CG33801	1	6	6	1	0	6	7.42	0.00024437	1	2	2	1	0	2	4.69	0.00037228	X	X	X	X	X	X	X	X	2	2	2	2	0	2	8.59	0.00029261	X	X	X	X
371	0.000242	1	0.0003	2	0	0	1.79769e+308	1	NP_610025.1	NP_610025.1	nessun dorma, isoform A [Drosophila melanogaster]	CG10722	nesd	5	14	14	5	0	14	11.79	0.00024247	5	7	7	5	0	7	14.62	0.00055408	1	1	1	1	0	1	1.99	4.686e-05	X	X	X	X	X	X	X	X	X	X	X	X
372	0.000232	1	0.000768	2	0	0	1.79769e+308	1	NP_573248.2	NP_573248.2	Spt7 [Drosophila melanogaster]	CG6506	Spt7	3	8	8	3	0	8	11.42	0.00023234	4	10	10	4	0	10	19.5	0.00132733	X	X	X	X	X	X	X	X	1	2	2	1	0	2	3.9	0.00020866	X	X	X	X
373	0.000219	1	0.000441	2	0	0	1.79769e+308	1	NP_523936.2	NP_523936.2	DnaJ-like-1, isoform A [Drosophila melanogaster]	CG10578	DnaJ-1	3	7	7	3	0	7	11.08	0.00021851	4	5	5	4	0	5	18.26	0.00071334	2	2	2	2	0	2	17.66	0.00016893	X	X	X	X	X	X	X	X	X	X	X	X
374	0.000215	1	0.001479	2	0	0	1.79769e+308	1	NP_610233.1	NP_610233.1	Eb1, isoform B [Drosophila melanogaster]	CG3265	Eb1	2	6	6	2	0	6	8.59	0.00021497	4	8	8	4	0	8	20.27	0.00131	6	17	17	6	0	17	37.46	0.0016481	X	X	X	X	X	X	X	X	X	X	X	X
375	0.000208	1	0.000129	2	0	0	1.79769e+308	1	NP_524538.2	NP_524538.2	ribosomal protein L4 [Drosophila melanogaster]	CG5502	RpL4	1	8	8	1	0	8	4.74	0.000208	X	X	X	X	X	X	X	X	1	1	1	1	0	1	4.24	7.035e-05	2	2	2	2	0	2	8.23	0.0001868	X	X	X	X
376	0.0002	1	0.000235	2	0	0	1.79769e+308	1	NP_729871.1	NP_729871.1	ribosomal protein S4, isoform A [Drosophila melanogaster]	CG11276	RpS4	2	5	5	2	0	5	6.9	0.00019974	1	1	1	1	0	1	7.66	0.00018257	X	X	X	X	X	X	X	X	1	2	2	1	0	2	3.83	0.00028701	X	X	X	X
377	0.000196	1	0.000148	2	0	0	1.79769e+308	1	NP_525123.2	NP_525123.2	half pint, isoform A [Drosophila melanogaster]	CG12085	pUf68	3	12	12	3	0	12	11.62	0.00019641	1	1	1	1	0	1	3.3	7.481e-05	3	5	5	3	0	5	7.06	0.00022144	X	X	X	X	X	X	X	X	X	X	X	X
378	0.000191	1	0.000444	2	0	0	1.79769e+308	1	NP_523905.2	NP_523905.2	succinyl coenzyme A synthetase alpha subunit, isoform A [Drosophila melanogaster]	CG1065	Scsalpha	2	6	6	2	0	6	8.54	0.00019072	X	X	X	X	X	X	X	X	4	9	9	4	0	9	14.33	0.0007741	1	1	1	1	0	1	5.79	0.00011419	X	X	X	X
379	0.000188	1	0.000351	2	0	0	1.79769e+308	4	NP_001286755.1;NP_001286756.1;NP_611751.1;NP_726286.1	NP_001286755.1	lethal (2) k09913, isoform F [Drosophila melanogaster]	CG3082	l(2)k09913	1	7	7	1	0	7	5.93	0.0001881	X	X	X	X	X	X	X	X	4	7	7	4	0	7	17.78	0.00050897	1	2	2	1	0	2	2.84	0.00019306	X	X	X	X
380	0.000183	1	0.001331	2	0	0	1.79769e+308	1	NP_611233.1	NP_611233.1	Ubiquinol-cytochrome c reductase 6.4 kDa subunit, isoform A [Drosophila melanogaster]	CG14482	UQCR-6.4	1	1	1	1	0	1	17.54	0.00018292	1	2	2	1	0	2	17.54	0.00167197	1	2	2	1	0	2	17.54	0.00098988	X	X	X	X	X	X	X	X	X	X	X	X
381	0.000172	1	0.000144	2	0	0	1.79769e+308	1	NP_611209.1	NP_611209.1	brahma associated protein 55kD [Drosophila melanogaster]	CG6546	Bap55	3	7	7	3	0	7	8	0.00017173	X	X	X	X	X	X	X	X	3	3	3	3	0	3	12.47	0.00019914	1	1	1	1	0	1	3.06	8.813e-05	X	X	X	X
383	0.000166	1	0.000246	2	0	0	1.79769e+308	3	NP_001096897.1;NP_001245554.1;NP_572352.1	NP_001096897.1	pod1, isoform F [Drosophila melanogaster]	CG4532	pod1	3	20	20	3	0	20	4.46	0.00016616	5	10	10	5	0	10	6.61	0.00037969	3	5	5	3	0	5	4.46	0.0001124	X	X	X	X	X	X	X	X	X	X	X	X
384	0.000166	1	0.000149	2	0	0	1.79769e+308	1	NP_524602.1	NP_524602.1	discs overgrown, isoform C [Drosophila melanogaster]	CG2048	dco	3	7	7	3	0	7	11.36	0.00016587	X	X	X	X	X	X	X	X	1	2	2	1	0	2	5.68	0.00012823	2	2	2	2	0	2	8.41	0.00017025	X	X	X	X
385	0.000164	1	0.000203	2	0	0	1.79769e+308	1	NP_723044.1	NP_723044.1	collagen type IV alpha 1, isoform A [Drosophila melanogaster]	CG4145	Cg25C	6	28	28	6	0	28	5.96	0.0001641	4	12	12	4	0	12	4.22	0.00032142	X	X	X	X	X	X	X	X	1	4	4	1	0	4	1.18	8.421e-05	X	X	X	X
386	0.000163	1	0.000101	2	0	0	1.79769e+308	10	NP_001014540.2;NP_001014542.1;NP_001163208.1;NP_001163209.1;NP_001163210.1;NP_001163211.1;NP_995893.1;NP_995894.2;NP_995899.2;NP_995900.1	NP_001014540.2	par-1, isoform W [Drosophila melanogaster]	CG8201	par-1	4	13	13	4	0	13	7.57	0.00016291	X	X	X	X	X	X	X	X	1	2	2	1	0	2	1.92	6.782e-05	2	3	3	2	0	3	3.49	0.00013505	X	X	X	X
387	0.000161	1	0.000603	2	0	0	1.79769e+308	2	NP_524829.1;NP_729480.1	NP_524829.1	eukaryotic translation initiation factor 4E1, isoform B [Drosophila melanogaster]	CG4035	eIF-4E	2	4	4	2	0	4	13.13	0.00016102	2	3	3	2	0	3	19.31	0.00055194	3	6	6	3	0	6	26.25	0.00065355	X	X	X	X	X	X	X	X	X	X	X	X
388	0.000159	1	0.000127	2	0	0	1.79769e+308	3	NP_001027225.1;NP_001245944.1;NP_001285748.1	NP_001027225.1	protein phosphatase 2A at 29B, isoform C [Drosophila melanogaster]	CG17291	Pp2A-29B	1	9	9	1	0	9	3.05	0.00015878	X	X	X	X	X	X	X	X	3	4	4	3	0	4	9.64	0.00019094	1	1	1	1	0	1	2.71	6.337e-05	X	X	X	X
389	0.000153	1	0.00013	2	0	0	1.79769e+308	1	NP_608786.2	NP_608786.2	uncharacterized protein CG17593, isoform A [Drosophila melanogaster]	CG17593	CG17593	2	7	7	2	0	7	7.35	0.00015333	1	2	2	1	0	2	5.67	0.00020022	1	1	1	1	0	1	2.1	5.927e-05	X	X	X	X	X	X	X	X	X	X	X	X
390	0.000146	1	0.000619	2	0	0	1.79769e+308	2	NP_476880.1;NP_476881.1	NP_476880.1	twins, isoform A [Drosophila melanogaster]	CG6235	tws	1	7	7	1	0	7	2.81	0.00014626	1	10	10	1	0	10	2.81	0.00095493	2	5	5	2	0	5	7.01	0.00028268	X	X	X	X	X	X	X	X	X	X	X	X
391	0.000146	1	0.000219	2	0	0	1.79769e+308	2	NP_001259843.1;NP_608545.1	NP_001259843.1	SAGA factor-like TAF6, isoform B [Drosophila melanogaster]	CG3883	Saf6	4	10	10	4	0	10	6.58	0.00014603	3	5	5	3	0	5	5.88	0.00033369	X	X	X	X	X	X	X	X	1	2	2	1	0	2	1.54	0.00010491	X	X	X	X
392	0.000145	1	0.000635	2	0	0	1.79769e+308	1	NP_524179.2	NP_524179.2	polo, isoform A [Drosophila melanogaster]	CG12306	polo	2	8	8	2	0	8	4.86	0.00014481	X	X	X	X	X	X	X	X	5	14	14	5	0	14	13.19	0.0006857	4	9	9	4	0	9	10.42	0.00058522	X	X	X	X
393	0.000141	1	0.001991	2	0	0	1.79769e+308	1	NP_524808.3	NP_524808.3	eukaryotic translation elongation factor 1 beta, isoform B [Drosophila melanogaster]	CG6341	Ef1beta	2	3	3	2	0	3	9.46	0.0001409	X	X	X	X	X	X	X	X	9	30	30	9	0	30	58.11	0.00381237	1	1	1	1	0	1	4.5	0.00016871	X	X	X	X
394	0.000132	1	0.000496	2	0	0	1.79769e+308	2	NP_609279.1;NP_723450.1	NP_609279.1	borealin-related, isoform A [Drosophila melanogaster]	CG4454	borr	2	4	4	2	0	4	12.06	0.0001324	2	3	3	2	0	3	11.43	0.00045382	2	6	6	2	0	6	10.48	0.00053736	X	X	X	X	X	X	X	X	X	X	X	X
395	0.00012	1	5.4e-05	2	0	0	1.79769e+308	1	NP_651970.1	NP_651970.1	Rs1, isoform A [Drosophila melanogaster]	CG2173	Rs1	1	9	9	1	0	9	3.2	0.00012	1	1	1	1	0	1	2.43	6.094e-05	X	X	X	X	X	X	X	X	1	1	1	1	0	1	2.56	4.79e-05	X	X	X	X
396	0.000119	1	0.000391	2	0	0	1.79769e+308	1	NP_611851.1	NP_611851.1	uncharacterized protein CG3735, isoform A [Drosophila melanogaster]	CG3735	CG3735	3	8	8	3	0	8	6.43	0.00011916	4	6	6	4	0	6	7.29	0.00040844	X	X	X	X	X	X	X	X	6	7	7	6	0	7	12.86	0.00037454	X	X	X	X
397	0.000117	1	0.000273	2	0	0	1.79769e+308	1	NP_477454.1	NP_477454.1	Aac11 [Drosophila melanogaster]	CG6582	Aac11	2	6	6	2	0	6	4.66	0.00011671	2	2	2	2	0	2	7.46	0.0001778	5	7	7	5	0	7	13.06	0.00036843	X	X	X	X	X	X	X	X	X	X	X	X
398	0.000116	1	0.000546	2	0	0	1.79769e+308	1	NP_523430.1	NP_523430.1	septin 1 [Drosophila melanogaster]	CG1403	2018-09-01	1	4	4	1	0	4	4.43	0.00011553	X	X	X	X	X	X	X	X	6	10	10	6	0	10	34.07	0.00078148	2	3	3	2	0	3	10.53	0.00031125	X	X	X	X
399	0.000106	1	3.3e-05	2	0	0	1.79769e+308	1	NP_572254.1	NP_572254.1	uncharacterized protein CG4078, isoform A [Drosophila melanogaster]	CG4078	CG4078	2	10	10	2	0	10	3.25	0.00010585	X	X	X	X	X	X	X	X	1	1	1	1	0	1	1.83	2.864e-05	1	1	1	1	0	1	2.03	3.802e-05	X	X	X	X
400	0.000105	1	0.000112	2	0	0	1.79769e+308	1	NP_477206.1	NP_477206.1	skittles, isoform A [Drosophila melanogaster]	CG9985	sktl	2	8	8	2	0	8	2.78	0.00010532	X	X	X	X	X	X	X	X	1	1	1	1	0	1	1.52	3.562e-05	3	4	4	3	0	4	8.21	0.00018916	X	X	X	X
401	0.000104	1	0.000142	2	0	0	1.79769e+308	2	NP_001259660.1;NP_523388.1	NP_001259660.1	beta spectrin, isoform B [Drosophila melanogaster]	CG5870	beta-Spec	10	23	23	10	0	23	6.63	0.0001039	7	12	12	7	0	12	4.55	0.00024775	2	3	3	2	0	3	2.3	3.667e-05	X	X	X	X	X	X	X	X	X	X	X	X
402	0.000101	1	0.000151	2	0	0	1.79769e+308	1	NP_610421.1	NP_610421.1	uncharacterized protein CG30349 [Drosophila melanogaster]	CG30349	CG30349	1	6	6	1	0	6	3.23	0.0001009	X	X	X	X	X	X	X	X	2	4	4	2	0	4	6.45	0.00018201	2	2	2	2	0	2	7.9	0.00012082	X	X	X	X
403	9.4e-05	1	8.4e-05	2	0	0	1.79769e+308	1	NP_524450.2	NP_524450.2	chaperonin containing TCP1 subunit 1, isoform A [Drosophila melanogaster]	CG5374	T-cp1	2	5	5	2	0	5	6.46	9.359e-05	X	X	X	X	X	X	X	X	1	2	2	1	0	2	2.15	0.0001013	1	1	1	1	0	1	3.77	6.724e-05	X	X	X	X
404	9.3e-05	1	8.4e-05	2	0	0	1.79769e+308	1	NP_511096.2	NP_511096.2	oligosaccharyltransferase 48kD subunit [Drosophila melanogaster]	CG9022	Ost48	1	4	4	1	0	4	2.45	9.288e-05	1	1	1	1	0	1	3.34	0.00010613	1	1	1	1	0	1	5.79	6.283e-05	X	X	X	X	X	X	X	X	X	X	X	X
405	9.1e-05	1	0.000196	2	0	0	1.79769e+308	1	NP_477320.1	NP_477320.1	origin recognition complex subunit 4 [Drosophila melanogaster]	CG2917	Orc4	1	4	4	1	0	4	3.49	9.086e-05	1	2	2	1	0	2	3.27	0.00020763	1	3	3	1	0	3	3.27	0.00018439	X	X	X	X	X	X	X	X	X	X	X	X
406	8.8e-05	1	0.000161	2	0	0	1.79769e+308	3	NP_001285372.1;NP_573214.1;NP_788922.1	NP_001285372.1	uncharacterized protein CG8611, isoform C [Drosophila melanogaster]	CG8611	CG8611	1	7	7	1	0	7	1.69	8.814e-05	3	5	5	3	0	5	5.31	0.00028775	1	1	1	1	0	1	2.05	3.407e-05	X	X	X	X	X	X	X	X	X	X	X	X
407	8.4e-05	1	0.000289	2	0	0	1.79769e+308	2	NP_001027190.1;NP_732100.2	NP_001027190.1	serpent, isoform D [Drosophila melanogaster]	CG3992	srp	2	6	6	2	0	6	4.83	8.386e-05	X	X	X	X	X	X	X	X	2	2	2	2	0	2	8.71	7.563e-05	6	10	10	6	0	10	17.29	0.00050207	X	X	X	X
408	8.2e-05	1	0.001143	2	0	0	1.79769e+308	1	NP_523396.1	NP_523396.1	scully, isoform A [Drosophila melanogaster]	CG7113	scu	1	2	2	1	0	2	4.71	8.177e-05	X	X	X	X	X	X	X	X	5	18	18	5	0	18	34.12	0.0019914	2	2	2	2	0	2	15.69	0.00029376	X	X	X	X
409	8e-05	1	5.1e-05	2	0	0	1.79769e+308	1	NP_648062.2	NP_648062.2	uncharacterized protein CG10077, isoform A [Drosophila melanogaster]	CG10077	CG10077	4	21	6	1	15	6.31189	6.6	8.045e-05	5	13	1	1	12	1.10482	6.6	6.436e-05	3	5	1	1	4	1.08953	4.4	3.758e-05	2	4	0	0	4	0	2.93	X	X	X	X	X
410	7.9e-05	1	0.000759	2	0	0	1.79769e+308	1	NP_648657.1	NP_648657.1	actin binding protein 1 [Drosophila melanogaster]	CG10083	Abp1	1	4	4	1	0	4	3.58	7.854e-05	X	X	X	X	X	X	X	X	6	10	10	6	0	10	20.9	0.00053129	6	14	14	6	0	14	19.21	0.00098749	X	X	X	X
411	7.9e-05	1	0.000227	2	0	0	1.79769e+308	1	NP_650196.1	NP_650196.1	uncharacterized protein CG5641 [Drosophila melanogaster]	CG5641	CG5641	2	3	3	2	0	3	5.3	7.899e-05	2	2	2	2	0	2	5.3	0.00024066	2	3	3	2	0	3	6.06	0.00021372	X	X	X	X	X	X	X	X	X	X	X	X
412	7.7e-05	1	0.000121	2	0	0	1.79769e+308	1	NP_001033943.2	NP_001033943.2	NAT1, isoform D [Drosophila melanogaster]	CG3845	NAT1	3	11	11	3	0	11	3.97	7.708e-05	2	4	4	2	0	4	3.23	0.00012809	3	6	6	3	0	6	4.84	0.00011376	X	X	X	X	X	X	X	X	X	X	X	X
413	7.6e-05	1	0.000888	2	0	0	1.79769e+308	1	NP_650101.1	NP_650101.1	uncharacterized protein CG14715 [Drosophila melanogaster]	CG14715	CG14715	1	1	1	1	0	1	7.97	7.555e-05	1	1	1	1	0	1	10.87	0.0003453	4	7	7	4	0	7	39.86	0.00143102	X	X	X	X	X	X	X	X	X	X	X	X
414	7.5e-05	1	0.000212	2	0	0	1.79769e+308	5	NP_001097664.2;NP_001262216.1;NP_001262217.1;NP_001262218.1;NP_649409.1	NP_001097664.2	ADP-ribosylation factor GTPase activating protein 3, isoform H [Drosophila melanogaster]	CG6838	ArfGAP3	2	4	4	2	0	4	6.33	7.542e-05	X	X	X	X	X	X	X	X	4	7	7	4	0	7	15.73	0.00035711	1	1	1	1	0	1	5.42	6.773e-05	X	X	X	X
415	6.6e-05	1	0.000928	2	0	0	1.79769e+308	1	NP_651762.1	NP_651762.1	uncharacterized protein CG7920, isoform A [Drosophila melanogaster]	CG7920	CG7920	1	3	3	1	0	3	2.31	6.557e-05	1	2	2	1	0	2	3.56	0.0001998	13	28	28	13	0	28	45.49	0.00165602	X	X	X	X	X	X	X	X	X	X	X	X
417	6.3e-05	1	0.000228	2	0	0	1.79769e+308	1	NP_609204.2	NP_609204.2	oligosaccharide transferase gamma subunit [Drosophila melanogaster]	CG7830	Ostgamma	1	2	2	1	0	2	5.76	6.319e-05	X	X	X	X	X	X	X	X	3	4	4	3	0	4	13.94	0.00034196	1	1	1	1	0	1	4.24	0.0001135	X	X	X	X
418	6.3e-05	1	0.000153	2	0	0	1.79769e+308	2	NP_570069.1;NP_726876.1	NP_570069.1	uncharacterized protein CG2875, isoform A [Drosophila melanogaster]	CG2875	CG2875	2	3	3	2	0	3	6.84	6.294e-05	1	2	2	1	0	2	3.82	0.00019176	2	2	2	2	0	2	6.44	0.00011353	X	X	X	X	X	X	X	X	X	X	X	X
419	6.3e-05	1	6.2e-05	2	0	0	1.79769e+308	1	NP_612047.1	NP_612047.1	Rev1 [Drosophila melanogaster]	CG12189	Rev1	1	6	6	1	0	6	1.71	6.287e-05	1	1	1	1	0	1	2.21	4.789e-05	X	X	X	X	X	X	X	X	1	2	2	1	0	2	2.21	7.528e-05	X	X	X	X
420	6.2e-05	1	0.000139	2	0	0	1.79769e+308	1	NP_728554.1	NP_728554.1	ubiquitin specific protease 10, isoform A [Drosophila melanogaster]	CG32479	Usp10	3	9	9	3	0	9	2.97	6.186e-05	X	X	X	X	X	X	X	X	2	3	3	2	0	3	2.04	5.579e-05	6	9	9	6	0	9	3.69	0.00022221	X	X	X	X
421	6.1e-05	1	7.6e-05	2	0	0	1.79769e+308	7	NP_001246282.1;NP_001286354.1;NP_001286355.1;NP_001303347.1;NP_610799.2;NP_725187.1;NP_725189.1	NP_001246282.1	Sin3A, isoform G [Drosophila melanogaster]	CG8815	Sin3A	4	12	12	4	0	12	3.34	6.056e-05	3	5	5	3	0	5	1.79	0.00011532	X	X	X	X	X	X	X	X	2	2	2	2	0	2	1.6	3.626e-05	X	X	X	X
422	5.8e-05	1	0.000349	2	0	0	1.79769e+308	1	NP_477064.1	NP_477064.1	peanut, isoform A [Drosophila melanogaster]	CG8705	pnut	2	3	3	2	0	3	8.53	5.803e-05	X	X	X	X	X	X	X	X	4	12	12	4	0	12	15.21	0.00062809	1	1	1	1	0	1	4.64	6.949e-05	X	X	X	X
423	5.8e-05	1	5.2e-05	2	0	0	1.79769e+308	1	NP_650096.1	NP_650096.1	uncharacterized protein CG14712 [Drosophila melanogaster]	CG14712	CG14712	3	7	7	3	0	7	3.16	5.765e-05	1	2	2	1	0	2	1.03	7.528e-05	X	X	X	X	X	X	X	X	1	1	1	1	0	1	1.03	2.958e-05	X	X	X	X
424	5.7e-05	1	0.0001	2	0	0	1.79769e+308	2	NP_001284794.1;NP_569950.1	NP_001284794.1	uncharacterized protein CG14803, isoform B [Drosophila melanogaster]	CG14803	CG14803	1	6	6	1	0	6	1	5.703e-05	2	4	4	2	0	4	2.1	0.00017375	1	1	1	1	0	1	2.28	2.572e-05	X	X	X	X	X	X	X	X	X	X	X	X
425	5.4e-05	1	6.1e-05	2	0	0	1.79769e+308	1	NP_650124.1	NP_650124.1	uncharacterized protein CG6962 [Drosophila melanogaster]	CG6962	CG6962	2	4	4	2	0	4	3.39	5.437e-05	X	X	X	X	X	X	X	X	1	2	2	1	0	2	1.56	7.356e-05	1	1	1	1	0	1	3.91	4.883e-05	X	X	X	X
426	5.2e-05	1	0.000734	2	0	0	1.79769e+308	1	NP_476595.1	NP_476595.1	eukaryotic translation initiation factor 4A, isoform C [Drosophila melanogaster]	CG9075	eIF-4a	1	2	2	1	0	2	5.96	5.174e-05	X	X	X	X	X	X	X	X	7	13	13	7	0	13	30.27	0.00091005	4	6	6	4	0	6	17.62	0.00055763	X	X	X	X
427	5.2e-05	1	5.7e-05	2	0	0	1.79769e+308	1	NP_523377.1	NP_523377.1	rudimentary, isoform A [Drosophila melanogaster]	CG18572	r	3	11	11	3	0	11	2.11	5.157e-05	2	3	3	2	0	3	1.17	6.428e-05	X	X	X	X	X	X	X	X	3	3	3	3	0	3	3.96	5.052e-05	X	X	X	X
428	5e-05	1	0.000395	2	0	0	1.79769e+308	3	NP_001350857.1;NP_611879.4;NP_726414.3	NP_001350857.1	yorkie, isoform H [Drosophila melanogaster]			1	2	2	1	0	2	5.5	4.989e-05	2	3	3	2	0	3	12.44	0.00034199	X	X	X	X	X	X	X	X	3	5	5	3	0	5	14.35	0.00044802	X	X	X	X
429	5e-05	1	0.000328	2	0	0	1.79769e+308	1	NP_610912.2	NP_610912.2	tumbleweed [Drosophila melanogaster]	CG13345	tum	1	3	3	1	0	3	4.96	5.005e-05	4	8	8	4	0	8	12.8	0.00060994	1	1	1	1	0	1	3.2	4.514e-05	X	X	X	X	X	X	X	X	X	X	X	X
430	5e-05	1	0.000281	2	0	0	1.79769e+308	1	NP_524282.4	NP_524282.4	pachytene checkpoint 2, isoform A [Drosophila melanogaster]	CG31453	pch2	1	2	2	1	0	2	2.85	4.953e-05	1	2	2	1	0	2	3.09	0.00022637	2	5	5	2	0	5	8.08	0.00033505	X	X	X	X	X	X	X	X	X	X	X	X
431	5e-05	1	5.2e-05	2	0	0	1.79769e+308	1	NP_611260.1	NP_611260.1	subito, isoform A [Drosophila melanogaster]	CG12298	sub	1	3	3	1	0	3	1.91	4.981e-05	X	X	X	X	X	X	X	X	1	1	1	1	0	1	2.39	4.492e-05	1	1	1	1	0	1	2.39	5.964e-05	X	X	X	X
432	4.9e-05	1	0.001052	2	0	0	1.79769e+308	1	NP_723089.1	NP_723089.1	helicase at 25E, isoform A [Drosophila melanogaster]	CG7269	Hel25E	1	2	2	1	0	2	2.36	4.918e-05	X	X	X	X	X	X	X	X	7	21	21	7	0	21	29.25	0.00139727	5	8	8	5	0	8	17.45	0.00070668	X	X	X	X
433	4.8e-05	1	0.000425	2	0	0	1.79769e+308	7	NP_001245583.1;NP_001259361.1;NP_525082.2;NP_727290.1;NP_727291.1;NP_727292.1;NP_996387.1	NP_001245583.1	moesin, isoform K [Drosophila melanogaster]	CG10701	Moe	2	3	3	2	0	3	4.18	4.842e-05	1	5	5	1	0	5	2.63	0.00036882	5	11	11	5	0	11	10.22	0.00048038	X	X	X	X	X	X	X	X	X	X	X	X
434	4.7e-05	1	7.7e-05	2	0	0	1.79769e+308	3	NP_001262024.1;NP_730369.1;NP_730370.2	NP_001262024.1	uncharacterized protein CG3961, isoform E [Drosophila melanogaster]	CG3961	CG3961	1	3	3	1	0	3	2.7	4.697e-05	X	X	X	X	X	X	X	X	1	1	1	1	0	1	2.7	4.236e-05	1	2	2	1	0	2	2.7	0.00011248	X	X	X	X
435	4.2e-05	1	7.7e-05	2	0	0	1.79769e+308	1	NP_572694.1	NP_572694.1	dynein light intermediate chain, isoform A [Drosophila melanogaster]	CG1938	Dlic	1	2	2	1	0	2	4.06	4.23e-05	1	1	1	1	0	1	3.65	9.666e-05	1	1	1	1	0	1	2.23	5.722e-05	X	X	X	X	X	X	X	X	X	X	X	X
436	4.2e-05	1	2.7e-05	2	0	0	1.79769e+308	1	NP_651211.2	NP_651211.2	structural maintenance of chromosomes 1 [Drosophila melanogaster]	CG6057	SMC1	2	5	5	2	0	5	2.02	4.211e-05	X	X	X	X	X	X	X	X	1	1	1	1	0	1	0.89	2.279e-05	1	1	1	1	0	1	0.89	3.025e-05	X	X	X	X
437	4.1e-05	1	2.8e-05	2	0	0	1.79769e+308	1	NP_573362.1	NP_573362.1	Ulp1 [Drosophila melanogaster]	CG12359	Ulp1	2	6	6	2	0	6	1.78	4.135e-05	1	1	1	1	0	1	1.92	3.149e-05	X	X	X	X	X	X	X	X	1	1	1	1	0	1	0.86	2.475e-05	X	X	X	X
438	4e-05	1	0.000384	2	0	0	1.79769e+308	2	NP_609299.1;NP_723470.1	NP_609299.1	mitochondrial trifunctional protein alpha subunit, isoform A [Drosophila melanogaster]	CG4389	Mtpalpha	1	3	3	1	0	3	2.43	3.995e-05	X	X	X	X	X	X	X	X	7	20	20	7	0	20	16.48	0.0007206	1	1	1	1	0	1	2.43	4.783e-05	X	X	X	X
439	4e-05	1	0.000222	2	0	0	1.79769e+308	2	NP_001163111.1;NP_523685.2	NP_001163111.1	withered, isoform C [Drosophila melanogaster]	CG12891	whd	2	3	3	2	0	3	3.71	4e-05	X	X	X	X	X	X	X	X	6	11	11	6	0	11	13.17	0.00039684	1	1	1	1	0	1	2.17	4.79e-05	X	X	X	X
440	4e-05	1	0.000136	2	0	0	1.79769e+308	1	NP_523486.1	NP_523486.1	little imaginal discs, isoform A [Drosophila melanogaster]	CG9088	lid	1	7	7	1	0	7	0.92	3.971e-05	1	1	1	1	0	1	0.82	2.593e-05	7	16	16	7	0	16	5.11	0.00024558	X	X	X	X	X	X	X	X	X	X	X	X
442	4e-05	1	8.5e-05	2	0	0	1.79769e+308	1	NP_611665.1	NP_611665.1	Rtf1, isoform A [Drosophila melanogaster]	CG10955	Rtf1	1	3	3	1	0	3	2.19	4.036e-05	1	1	1	1	0	1	2.19	6.149e-05	1	3	3	1	0	3	2.19	0.00010921	X	X	X	X	X	X	X	X	X	X	X	X
443	3.8e-05	1	0.000555	2	0	0	1.79769e+308	1	NP_733371.1	NP_733371.1	prolyl-4-hydroxylase-alpha EFB [Drosophila melanogaster]	CG31022	PH4alphaEFB	1	2	2	1	0	2	2.36	3.791e-05	X	X	X	X	X	X	X	X	6	11	11	6	0	11	24.18	0.00056423	4	8	8	4	0	8	17.09	0.00054479	X	X	X	X
444	3.8e-05	1	0.000173	2	0	0	1.79769e+308	1	NP_650572.2	NP_650572.2	chaperonin containing TCP1 subunit 3, isoform A [Drosophila melanogaster]	CG8977	Cctgamma	1	2	2	1	0	2	3.31	3.833e-05	1	1	1	1	0	1	3.31	8.759e-05	2	5	5	2	0	5	9.01	0.0002593	X	X	X	X	X	X	X	X	X	X	X	X
445	3.7e-05	1	8.3e-05	2	0	0	1.79769e+308	1	NP_649470.2	NP_649470.2	eukaryotic translation initiation factor 3 subunit a, isoform A [Drosophila melanogaster]	CG9805	eIF3-S10	3	4	4	3	0	4	3.51	3.658e-05	1	1	1	1	0	1	1.49	4.18e-05	3	5	5	3	0	5	3.68	0.00012373	X	X	X	X	X	X	X	X	X	X	X	X
446	3.7e-05	1	6.7e-05	2	0	0	1.79769e+308	1	NP_609329.3	NP_609329.3	uncharacterized protein CG4619, isoform A [Drosophila melanogaster]	CG4619	CG4619	1	2	2	1	0	2	2.11	3.658e-05	1	1	1	1	0	1	1.75	8.36e-05	1	1	1	1	0	1	2.98	4.949e-05	X	X	X	X	X	X	X	X	X	X	X	X
447	3.7e-05	1	5.9e-05	2	0	0	1.79769e+308	1	NP_611896.1	NP_611896.1	uncharacterized protein CG3356 [Drosophila melanogaster]	CG3356	CG3356	2	4	4	2	0	4	2.94	3.717e-05	X	X	X	X	X	X	X	X	1	2	2	1	0	2	1.69	5.029e-05	1	2	2	1	0	2	1.69	6.676e-05	X	X	X	X
448	3.7e-05	1	5.3e-05	2	0	0	1.79769e+308	1	NP_723996.1	NP_723996.1	gluon [Drosophila melanogaster]	CG11397	glu	2	5	5	2	0	5	1.85	3.7e-05	X	X	X	X	X	X	X	X	3	4	4	3	0	4	2.84	8.009e-05	1	1	1	1	0	1	1.06	2.658e-05	X	X	X	X
449	3.4e-05	1	0.000651	2	0	0	1.79769e+308	3	NP_001097371.1;NP_001097372.1;NP_725832.2	NP_001097371.1	prohibitin 2, isoform D [Drosophila melanogaster]	CG15081	Phb2	1	1	1	1	0	1	3.63	3.441e-05	X	X	X	X	X	X	X	X	3	10	10	3	0	10	13.2	0.00093107	1	3	3	1	0	3	4.95	0.00037083	X	X	X	X
450	3.3e-05	1	0.000101	2	0	0	1.79769e+308	3	NP_001260719.1;NP_610203.2;NP_724455.2	NP_001260719.1	arsenic resistance protein 2, isoform E [Drosophila melanogaster]	CG7843	Ars2	2	3	3	2	0	3	2.67	3.345e-05	1	1	1	1	0	1	1.82	5.096e-05	4	5	5	4	0	5	7.06	0.00015086	X	X	X	X	X	X	X	X	X	X	X	X
451	3.2e-05	1	6.8e-05	2	0	0	1.79769e+308	4	NP_001245679.1;NP_001285267.1;NP_511161.2;NP_727841.1	NP_001245679.1	topoisomerase 1, isoform D [Drosophila melanogaster]	CG6146	Top1	2	3	3	2	0	3	2.99	3.225e-05	1	1	1	1	0	1	1.96	4.912e-05	1	3	3	1	0	3	1.44	8.725e-05	X	X	X	X	X	X	X	X	X	X	X	X
452	3.1e-05	1	6.1e-05	2	0	0	1.79769e+308	1	NP_611162.2	NP_611162.2	integrator 8 [Drosophila melanogaster]	CG5859	IntS8	2	3	3	2	0	3	3.77	3.106e-05	X	X	X	X	X	X	X	X	2	3	3	2	0	3	3.97	8.405e-05	1	1	1	1	0	1	2.09	3.719e-05	X	X	X	X
453	3.1e-05	1	3.6e-05	2	0	0	1.79769e+308	3	NP_001245484.1;NP_001284798.1;NP_524864.2	NP_001245484.1	enhanced adult sensory threshold, isoform E [Drosophila melanogaster]	CG4399	east	2	7	7	2	0	7	1.79	3.116e-05	X	X	X	X	X	X	X	X	1	2	2	1	0	2	0.64	2.409e-05	1	3	3	1	0	3	0.6	4.798e-05	X	X	X	X
454	3e-05	1	0.000155	2	0	0	1.79769e+308	1	NP_612093.1	NP_612093.1	Rabaptin-5-associated exchange factor for Rab5 [Drosophila melanogaster]	CG9139	Rabex-5	1	2	2	1	0	2	1.44	2.996e-05	X	X	X	X	X	X	X	X	2	5	5	2	0	5	5.17	0.00020267	2	2	2	2	0	2	4.45	0.00010763	X	X	X	X
455	3e-05	1	9.6e-05	2	0	0	1.79769e+308	1	NP_609493.1	NP_609493.1	nucleoporin 160kD, isoform A [Drosophila melanogaster]	CG4738	Nup160	2	4	4	2	0	4	1.49	2.956e-05	X	X	X	X	X	X	X	X	3	3	3	3	0	3	4.61	5.998e-05	4	5	5	4	0	5	5.88	0.00013272	X	X	X	X
456	2.9e-05	1	0.000264	2	0	0	1.79769e+308	1	NP_476760.1	NP_476760.1	topoisomerase 2, isoform A [Drosophila melanogaster]	CG10223	Top2	2	4	4	2	0	4	1.66	2.882e-05	1	3	3	1	0	3	0.9	9.879e-05	13	22	22	13	0	22	13.55	0.00042892	X	X	X	X	X	X	X	X	X	X	X	X
457	2.8e-05	1	0.000211	2	0	0	1.79769e+308	1	NP_608694.2	NP_608694.2	dynamin related protein 1, isoform A [Drosophila melanogaster]	CG3210	Drp1	1	2	2	1	0	2	1.22	2.837e-05	1	1	1	1	0	1	2.99	6.483e-05	X	X	X	X	X	X	X	X	5	7	7	5	0	7	7.89	0.00035671	X	X	X	X
458	2.8e-05	1	0.000176	2	0	0	1.79769e+308	2	NP_001262778.1;NP_001262783.1	NP_001262778.1	syncrip, isoform K [Drosophila melanogaster]	CG17838	Syp	1	2	2	1	0	2	1.73	2.769e-05	2	4	4	2	0	4	3.19	0.00025313	X	X	X	X	X	X	X	X	2	2	2	2	0	2	5.84	9.948e-05	X	X	X	X
459	2.8e-05	1	0.000133	2	0	0	1.79769e+308	1	NP_608528.1	NP_608528.1	mediator complex subunit 15 [Drosophila melanogaster]	CG4184	MED15	1	2	2	1	0	2	2.14	2.784e-05	1	3	3	1	0	3	3.2	0.00019086	1	2	2	1	0	2	3.2	7.533e-05	X	X	X	X	X	X	X	X	X	X	X	X
460	2.8e-05	1	8.8e-05	2	0	0	1.79769e+308	1	NP_611842.1	NP_611842.1	decapping protein 1, isoform A [Drosophila melanogaster]	CG11183	DCP1	1	1	1	1	0	1	2.69	2.803e-05	X	X	X	X	X	X	X	X	1	1	1	1	0	1	3.49	7.584e-05	1	1	1	1	0	1	3.49	0.00010068	X	X	X	X
461	2.8e-05	1	7e-05	2	0	0	1.79769e+308	1	NP_611843.2	NP_611843.2	DNA ligase I [Drosophila melanogaster]	CG5602	DNA-ligI	1	2	2	1	0	2	1.47	2.791e-05	1	1	1	1	0	1	1.47	6.379e-05	1	2	2	1	0	2	1.47	7.553e-05	X	X	X	X	X	X	X	X	X	X	X	X
462	2.6e-05	1	0.000453	2	0	0	1.79769e+308	2	NP_001246793.1;NP_648888.1	NP_001246793.1	uncharacterized protein CG4729, isoform E [Drosophila melanogaster]	CG4729	CG4729	1	1	1	1	0	1	2.52	2.626e-05	2	4	4	2	0	4	8.06	0.00048011	3	6	6	3	0	6	11.08	0.00042637	X	X	X	X	X	X	X	X	X	X	X	X
463	2.6e-05	1	0.000432	2	0	0	1.79769e+308	1	NP_610339.1	NP_610339.1	spenito, isoform B [Drosophila melanogaster]	CG2910	nito	2	2	2	2	0	2	3.4	2.63e-05	5	12	12	5	0	12	6.94	0.00072108	3	4	4	3	0	4	5.93	0.0001423	X	X	X	X	X	X	X	X	X	X	X	X
464	2.6e-05	1	3.2e-05	2	0	0	1.79769e+308	1	NP_610551.1	NP_610551.1	uncharacterized protein CG1371 [Drosophila melanogaster]	CG1371	CG1371	1	3	3	1	0	3	0.92	2.609e-05	1	1	1	1	0	1	0.92	3.974e-05	1	1	1	1	0	1	2.25	2.353e-05	X	X	X	X	X	X	X	X	X	X	X	X
465	2.5e-05	1	0.000241	2	0	0	1.79769e+308	1	NP_612028.4	NP_612028.4	uncharacterized protein CG32344 [Drosophila melanogaster]	CG32344	CG32344	1	2	2	1	0	2	1.81	2.521e-05	3	6	6	3	0	6	7.26	0.00034572	2	4	4	2	0	4	5.93	0.00013645	X	X	X	X	X	X	X	X	X	X	X	X
466	2.5e-05	1	0.000161	2	0	0	1.79769e+308	1	NP_609709.1	NP_609709.1	mitochondrial transcription termination factor [Drosophila melanogaster]	CG18124	mTTF	1	1	1	1	0	1	3.17	2.543e-05	1	1	1	1	0	1	3.17	0.00011622	2	3	3	2	0	3	6.59	0.00020643	X	X	X	X	X	X	X	X	X	X	X	X
467	2.5e-05	1	4.2e-05	2	0	0	1.79769e+308	2	NP_001259918.1;NP_608664.2	NP_001259918.1	secretory 24CD, isoform C [Drosophila melanogaster]	CG10882	Sec24CD	1	3	3	1	0	3	1.3	2.541e-05	X	X	X	X	X	X	X	X	1	1	1	1	0	1	1.3	2.292e-05	1	2	2	1	0	2	1.71	6.085e-05	X	X	X	X
468	2.5e-05	1	1.8e-05	2	0	0	1.79769e+308	1	NP_611875.1	NP_611875.1	integrator 1 [Drosophila melanogaster]	CG3173	IntS1	1	5	5	1	0	5	0.63	2.539e-05	1	1	1	1	0	1	0.73	2.321e-05	1	1	1	1	0	1	0.73	1.374e-05	X	X	X	X	X	X	X	X	X	X	X	X
469	2.4e-05	1	0.000184	2	0	0	1.79769e+308	1	NP_477385.1	NP_477385.1	eukaryotic translation initiation factor 3 subunit e [Drosophila melanogaster]	CG9677	Int6	1	1	1	1	0	1	4.14	2.397e-05	1	1	1	1	0	1	4.14	0.00010954	3	4	4	3	0	4	11.03	0.00025942	X	X	X	X	X	X	X	X	X	X	X	X
470	2.4e-05	1	0.000119	2	0	0	1.79769e+308	1	NP_572337.1	NP_572337.1	uncharacterized protein CG3198 [Drosophila melanogaster]	CG3198	CG3198	1	1	1	1	0	1	4.57	2.38e-05	1	1	1	1	0	1	2.51	0.00010879	1	2	2	1	0	2	2.51	0.00012882	X	X	X	X	X	X	X	X	X	X	X	X
471	2.3e-05	1	5.8e-05	2	0	0	1.79769e+308	1	NP_569843.2	NP_569843.2	uncharacterized protein CG18273 [Drosophila melanogaster]	CG18273	CG18273	1	3	3	1	0	3	1.89	2.272e-05	1	1	1	1	0	1	0.8	3.461e-05	3	4	4	3	0	4	4.87	8.195e-05	X	X	X	X	X	X	X	X	X	X	X	X
472	2.1e-05	1	9.6e-05	2	0	0	1.79769e+308	2	NP_001137709.1;NP_725859.2	NP_001137709.1	enabled, isoform F [Drosophila melanogaster]	CG15112	ena	1	2	2	1	0	2	1.22	2.128e-05	1	1	1	1	0	1	1.84	4.862e-05	2	5	5	2	0	5	2.55	0.00014394	X	X	X	X	X	X	X	X	X	X	X	X
473	2e-05	1	5.4e-05	2	0	0	1.79769e+308	9	NP_001097012.1;NP_001188662.1;NP_001188663.1;NP_001285385.1;NP_001285386.1;NP_001285387.1;NP_001285388.1;NP_573240.1;NP_728095.2	NP_001097012.1	uncharacterized protein CG42684, isoform C [Drosophila melanogaster]	CG42684	CG42684	1	3	3	1	0	3	1.46	1.98e-05	1	2	2	1	0	2	1.08	6.032e-05	X	X	X	X	X	X	X	X	1	2	2	1	0	2	1.27	4.741e-05	X	X	X	X
474	1.9e-05	1	0.000137	2	0	0	1.79769e+308	1	NP_726243.1	NP_726243.1	bellwether [Drosophila melanogaster]	CG3612	blw	1	1	1	1	0	1	1.99	1.889e-05	1	2	2	1	0	2	2.9	0.00017265	2	2	2	2	0	2	7.61	0.00010222	X	X	X	X	X	X	X	X	X	X	X	X
476	1.8e-05	1	0.000154	2	0	0	1.79769e+308	1	NP_476708.1	NP_476708.1	RNA polymerase I 135kD subunit [Drosophila melanogaster]	CG4033	RpI135	1	2	2	1	0	2	1.33	1.847e-05	X	X	X	X	X	X	X	X	6	11	11	6	0	11	8.95	0.00027487	1	1	1	1	0	1	2.39	3.317e-05	X	X	X	X
477	1.8e-05	1	0.000104	2	0	0	1.79769e+308	2	NP_572221.1;NP_726992.2	NP_572221.1	spoonbill, isoform A [Drosophila melanogaster]	CG3249	spoon	1	1	1	1	0	1	3.25	1.782e-05	X	X	X	X	X	X	X	X	2	3	3	2	0	3	6.67	0.00014467	1	1	1	1	0	1	3.08	6.402e-05	X	X	X	X
478	1.8e-05	1	5.4e-05	2	0	0	1.79769e+308	1	NP_476593.2	NP_476593.2	lethal (1) 1Bi [Drosophila melanogaster]	CG6189	l(1)1Bi	1	2	2	1	0	2	0.88	1.84e-05	X	X	X	X	X	X	X	X	2	3	3	2	0	3	2.21	7.47e-05	1	1	1	1	0	1	2.65	3.306e-05	X	X	X	X
479	1.8e-05	1	2.2e-05	2	0	0	1.79769e+308	1	NP_001262272.1	NP_001262272.1	canoe, isoform G [Drosophila melanogaster]	CG42312	cno	3	4	2	1	2	3.33333	2.56	1.781e-05	3	3	0	0	3	1.5	2.36	3.664e-05	1	1	0	0	1	0.5	0.87	7.23e-06	X	X	X	X	X	X	X	X	X	X	X	X
480	1.6e-05	1	0.000698	2	0	0	1.79769e+308	1	NP_651291.1	NP_651291.1	uncharacterized protein CG5808 [Drosophila melanogaster]	CG5808	CG5808	1	1	1	1	0	1	2.45	1.597e-05	X	X	X	X	X	X	X	X	6	27	27	6	0	27	19.45	0.00116648	3	4	4	3	0	4	6.13	0.00022943	X	X	X	X
481	1.6e-05	1	9.8e-05	2	0	0	1.79769e+308	1	NP_611300.2	NP_611300.2	nucleoporin 75kD [Drosophila melanogaster]	CG5733	Nup75	1	1	1	1	0	1	2.84	1.561e-05	X	X	X	X	X	X	X	X	1	2	2	1	0	2	3.14	8.447e-05	2	2	2	2	0	2	5.54	0.00011214	X	X	X	X
482	1.6e-05	1	6.9e-05	2	0	0	1.79769e+308	2	NP_001260992.1;NP_611019.2	NP_001260992.1	relative of woc, isoform C [Drosophila melanogaster]	CG8092	row	1	2	2	1	0	2	0.85	1.603e-05	1	2	2	1	0	2	0.69	7.325e-05	2	3	3	2	0	3	1.92	6.505e-05	X	X	X	X	X	X	X	X	X	X	X	X
483	1.6e-05	1	5.2e-05	2	0	0	1.79769e+308	9	NP_001137783.1;NP_001137784.1;NP_001137785.1;NP_001137786.1;NP_001137787.1;NP_476966.1;NP_722950.2;NP_722951.1;NP_722952.1	NP_001137783.1	cappuccino, isoform E [Drosophila melanogaster]	CG3399	capu	1	2	2	1	0	2	1.56	1.629e-05	1	2	2	1	0	2	1.8	7.446e-05	X	X	X	X	X	X	X	X	1	1	1	1	0	1	1.48	2.926e-05	X	X	X	X
484	1.5e-05	1	0.000155	2	0	0	1.79769e+308	8	NP_001036594.1;NP_001097541.1;NP_001097544.1;NP_001097545.1;NP_001246662.1;NP_001246663.1;NP_001261556.1;NP_729327.1	NP_001036594.1	Ectoderm-expressed 4, isoform F [Drosophila melanogaster]	CG43119	Ect4	1	2	2	1	0	2	1.18	1.533e-05	X	X	X	X	X	X	X	X	4	7	7	4	0	7	4.19	0.00014521	4	6	6	4	0	6	3.68	0.00016524	X	X	X	X
485	1.4e-05	1	5.9e-05	2	0	0	1.79769e+308	4	NP_001097262.1;NP_001260873.1;NP_001260874.1;NP_724980.1	NP_001097262.1	uncharacterized protein CG30015, isoform C [Drosophila melanogaster]	CG30015	CG30015	1	2	2	1	0	2	1.19	1.381e-05	X	X	X	X	X	X	X	X	1	1	1	1	0	1	1.19	1.868e-05	3	4	4	3	0	4	4.04	9.922e-05	X	X	X	X
486	1.4e-05	1	5.7e-05	2	0	0	1.79769e+308	11	NP_001162909.1;NP_001162910.1;NP_001162911.1;NP_001188720.1;NP_001260234.1;NP_001260235.1;NP_523509.2;NP_723365.1;NP_787997.2;NP_995647.2;NP_995648.1	NP_001162909.1	PDGF- and VEGF-receptor related, isoform H [Drosophila melanogaster]	CG8222	Pvr	1	2	2	1	0	2	0.68	1.415e-05	X	X	X	X	X	X	X	X	1	2	2	1	0	2	1.83	3.828e-05	3	3	3	3	0	3	2.71	7.623e-05	X	X	X	X
487	1.4e-05	1	5.5e-05	2	0	0	1.79769e+308	1	NP_732773.1	NP_732773.1	locomotion defects, isoform D [Drosophila melanogaster]	CG5248	loco	1	2	2	1	0	2	0.91	1.353e-05	X	X	X	X	X	X	X	X	1	2	2	1	0	2	1.62	3.661e-05	2	3	3	2	0	3	3.11	7.292e-05	X	X	X	X
488	1.4e-05	1	5.2e-05	2	0	0	1.79769e+308	1	NP_477382.1	NP_477382.1	Bub1-related kinase [Drosophila melanogaster]	CG7838	BubR1	1	2	2	1	0	2	2.12	1.428e-05	2	2	2	2	0	2	2.74	6.528e-05	1	2	2	1	0	2	1.58	3.865e-05	X	X	X	X	X	X	X	X	X	X	X	X
489	1.4e-05	1	5.1e-05	2	0	0	1.79769e+308	1	NP_608739.1	NP_608739.1	splicing factor 3b subunit 2, isoform A [Drosophila melanogaster]	CG3605	CG3605	1	1	1	1	0	1	1.47	1.392e-05	1	1	1	1	0	1	1.74	6.362e-05	1	1	1	1	0	1	1.74	3.767e-05	X	X	X	X	X	X	X	X	X	X	X	X
490	1.3e-05	1	6.7e-05	2	0	0	1.79769e+308	1	NP_001036444.1	NP_001036444.1	adherens junction protein p120 [Drosophila melanogaster]	CG17484	p120ctn	1	1	1	1	0	1	1.28	1.335e-05	1	1	1	1	0	1	1.28	6.101e-05	2	2	2	2	0	2	5.51	7.224e-05	X	X	X	X	X	X	X	X	X	X	X	X
491	1e-05	1	0.000122	2	0	0	1.79769e+308	1	NP_001036254.1	NP_001036254.1	uncharacterized protein CG13366, isoform B [Drosophila melanogaster]	CG13366	CG13366	1	1	1	1	0	1	1.1	9.53e-06	4	5	5	4	0	5	7.95	0.00021778	1	1	1	1	0	1	2.29	2.579e-05	X	X	X	X	X	X	X	X	X	X	X	X
492	1e-05	1	2.4e-05	2	0	0	1.79769e+308	1	NP_001262274.1	NP_001262274.1	canoe, isoform I [Drosophila melanogaster]	CG42312	cno	3	3	1	1	2	1.66667	3.47	9.56e-06	3	3	0	0	3	1.5	2.53	3.932e-05	1	1	0	0	1	0.5	0.94	7.76e-06	X	X	X	X	X	X	X	X	X	X	X	X
493	9e-06	1	5.4e-05	2	0	0	1.79769e+308	7	NP_001245816.1;NP_001259802.1;NP_001259803.1;NP_001259805.1;NP_524718.2;NP_722615.1;NP_722616.1	NP_001245816.1	split ends, isoform D [Drosophila melanogaster]	CG18497	spen	1	5	5	1	0	5	0.49	9.47e-06	X	X	X	X	X	X	X	X	3	4	4	3	0	4	1.13	2.05e-05	9	13	13	9	0	13	3.09	8.845e-05	X	X	X	X
494	9e-06	1	3.6e-05	2	0	0	1.79769e+308	1	NP_476591.1	NP_476591.1	kurz, isoform A [Drosophila melanogaster]	CG3228	kz	1	1	1	1	0	1	0.76	8.75e-06	1	1	1	1	0	1	2.68	3.998e-05	X	X	X	X	X	X	X	X	1	1	1	1	0	1	2.68	3.142e-05	X	X	X	X
495	9e-06	1	6e-06	2	0	0	1.79769e+308	5	NP_001137761.1;NP_001245818.1;NP_001245819.1;NP_001245820.1;NP_523441.1	NP_001137761.1	kismet, isoform C [Drosophila melanogaster]	CG3696	kis	3	5	5	3	0	5	0.98	9.45e-06	X	X	X	X	X	X	X	X	1	1	1	1	0	1	0.18	5.11e-06	1	1	1	1	0	1	0.34	6.79e-06	X	X	X	X
496	8e-06	1	3e-05	2	0	0	1.79769e+308	1	NP_609389.1	NP_609389.1	Cullin-associated and neddylation-dissociated 1, isoform A [Drosophila melanogaster]	CG5366	Cand1	1	1	1	1	0	1	1.44	8.35e-06	1	1	1	1	0	1	2.48	3.818e-05	1	1	1	1	0	1	2.08	2.261e-05	X	X	X	X	X	X	X	X	X	X	X	X
497	7e-06	1	2.9e-05	2	0	0	1.79769e+308	1	NP_651922.1	NP_651922.1	legless [Drosophila melanogaster]	CG2041	lgs	1	1	1	1	0	1	1.57	7.1e-06	1	1	1	1	0	1	1.09	3.244e-05	X	X	X	X	X	X	X	X	1	1	1	1	0	1	1.77	2.55e-05	X	X	X	X
498	6e-06	1	9e-06	2	0	0	1.79769e+308	1	NP_001097279.2	NP_001097279.2	uncharacterized protein CG13185 [Drosophila melanogaster]	CG13185	CG13185	2	3	3	2	0	3	0.62	5.66e-06	1	1	1	1	0	1	0.42	8.62e-06	2	2	2	2	0	2	0.62	1.021e-05	X	X	X	X	X	X	X	X	X	X	X	X
499	5e-06	1	3.4e-05	2	0	0	1.79769e+308	2	NP_001262123.1;NP_649259.1	NP_001262123.1	Spc105-related, isoform B [Drosophila melanogaster]	CG11451	Spc105R	1	1	1	1	0	1	0.87	5.32e-06	2	2	2	2	0	2	2.3	4.862e-05	X	X	X	X	X	X	X	X	1	1	1	1	0	1	1.12	1.911e-05	X	X	X	X
500	5e-06	1	3.1e-05	2	0	0	1.79769e+308	1	NP_648818.3	NP_648818.3	lethal (3) 72Ab [Drosophila melanogaster]	CG5931	l(3)72Ab	1	1	1	1	0	1	0.51	4.87e-06	1	2	2	1	0	2	0.75	4.449e-05	X	X	X	X	X	X	X	X	1	1	1	1	0	1	0.75	1.749e-05	X	X	X	X
501	5e-06	1	2.7e-05	2	0	0	1.79769e+308	4	NP_651960.2;NP_728561.1;NP_728562.1;NP_728563.1	NP_651960.2	trio, isoform A [Drosophila melanogaster]	CG18214	trio	1	1	1	1	0	1	0.4	4.61e-06	1	2	2	1	0	2	0.62	4.211e-05	1	1	1	1	0	1	0.62	1.247e-05	X	X	X	X	X	X	X	X	X	X	X	X
502	4e-06	1	5.6e-05	2	0	0	1.79769e+308	2	NP_001260427.1;NP_524891.1	NP_001260427.1	target of rapamycin, isoform B [Drosophila melanogaster]	CG5092	Tor	1	1	1	1	0	1	0.45	4.22e-06	3	5	5	3	0	5	2.1	9.642e-05	X	X	X	X	X	X	X	X	1	1	1	1	0	1	0.65	1.516e-05	X	X	X	X
503	3e-06	1	7.5e-05	2	0	0	1.79769e+308	1	NP_001138004.2	NP_001138004.2	uncharacterized protein CG43427, isoform H [Drosophila melanogaster]	CG43427	CG43427	1	1	0	0	1	0.5	1.21	3.49e-06	X	X	X	X	X	X	X	X	3	4	1	1	3	4	2.34	7.558e-05	2	3	1	1	2	3	1.61	7.526e-05	X	X	X	X
504	0	0	0.000926	3	0	0	0	1	NP_477392.1	NP_477392.1	supercoiling factor, isoform A [Drosophila melanogaster]	CG9148	scf	X	X	X	X	X	X	X	X	4	6	6	4	0	6	22.8	0.00086902	3	5	5	3	0	5	17.93	0.00042875	5	13	13	5	0	13	21.58	0.00147996	X	X	X	X
505	0	0	0.00091	3	0	0	0	1	NP_477411.1	NP_477411.1	smt3, isoform A [Drosophila melanogaster]	CG4494	smt3	X	X	X	X	X	X	X	X	1	2	2	1	0	2	12.22	0.00105892	2	4	4	2	0	4	25.56	0.00125385	1	1	1	1	0	1	12.22	0.00041616	X	X	X	X
506	0	0	0.000616	3	0	0	0	4	NP_001261153.1;NP_477179.1;NP_477180.1;NP_726344.1	NP_001261153.1	apontic, isoform F [Drosophila melanogaster]	CG5393	apt	X	X	X	X	X	X	X	X	2	3	3	2	0	3	4.41	0.00028648	6	13	13	6	0	13	14.03	0.00073497	6	11	11	6	0	11	14.43	0.00082565	X	X	X	X
507	0	0	0.000578	3	0	0	0	1	NP_572521.2	NP_572521.2	heterochromatin protein 1b, isoform A [Drosophila melanogaster]	CG7041	HP1b	X	X	X	X	X	X	X	X	3	4	4	3	0	4	21.67	0.00079419	3	4	4	3	0	4	22.08	0.00047019	2	3	3	2	0	3	11.25	0.00046818	X	X	X	X
508	0	0	0.000575	3	0	0	0	2	NP_001286549.1;NP_611265.1	NP_001286549.1	oligosaccharide transferase delta subunit, isoform B [Drosophila melanogaster]	CG6370	OstDelta	X	X	X	X	X	X	X	X	2	4	4	2	0	4	4.58	0.00030111	9	24	24	9	0	24	25.59	0.00106963	5	6	6	5	0	6	13.74	0.00035502	X	X	X	X
509	0	0	0.000544	3	0	0	0	1	NP_524377.1	NP_524377.1	bicoid interacting protein 1, isoform A [Drosophila melanogaster]	CG6046	Bin1	X	X	X	X	X	X	X	X	1	1	1	1	0	1	10.67	0.00031767	3	3	3	3	0	3	20.67	0.00056423	2	3	3	2	0	3	20	0.00074909	X	X	X	X
510	0	0	0.000432	3	0	0	0	1	NP_650438.2	NP_650438.2	Set [Drosophila melanogaster]	CG4299	Set	X	X	X	X	X	X	X	X	1	2	2	1	0	2	5.2	0.00035428	1	5	5	1	0	5	5.2	0.00052438	1	3	3	1	0	3	5.2	0.00041771	X	X	X	X
511	0	0	0.000425	3	0	0	0	1	NP_647836.2	NP_647836.2	Sc2 [Drosophila melanogaster]	CG10849	Sc2	X	X	X	X	X	X	X	X	1	1	1	1	0	1	4.64	0.00015779	2	4	4	2	0	4	7.62	0.00037366	3	6	6	3	0	6	11.59	0.00074412	X	X	X	X
512	0	0	0.00041	3	0	0	0	1	NP_477043.1	NP_477043.1	uncharacterized protein CG4038 [Drosophila melanogaster]	CG4038	CG4038	X	X	X	X	X	X	X	X	1	1	1	1	0	1	7.59	0.00020106	3	6	6	3	0	6	21.52	0.00071422	1	2	2	1	0	2	7.59	0.00031607	X	X	X	X
513	0	0	0.000408	3	0	0	0	1	NP_525120.1	NP_525120.1	nucleolar protein at 60B, isoform A [Drosophila melanogaster]	CG3333	Nop60B	X	X	X	X	X	X	X	X	2	2	2	2	0	2	6.69	0.0001876	7	12	12	7	0	12	21.06	0.00066641	3	5	5	3	0	5	8.46	0.00036864	X	X	X	X
514	0	0	0.000398	3	0	0	0	1	NP_524103.2	NP_524103.2	signal sequence receptor beta [Drosophila melanogaster]	CG5474	SsRbeta	X	X	X	X	X	X	X	X	1	2	2	1	0	2	12.63	0.00050159	1	2	2	1	0	2	12.63	0.00029696	1	2	2	1	0	2	12.63	0.00039426	X	X	X	X
515	0	0	0.000397	3	0	0	0	1	NP_610144.1	NP_610144.1	ribosomal protein L21, isoform A [Drosophila melanogaster]	CG12775	RpL21	X	X	X	X	X	X	X	X	1	2	2	1	0	2	10.69	0.00059939	1	2	2	1	0	2	10.69	0.00035486	1	1	1	1	0	1	10.69	0.00023556	X	X	X	X
516	0	0	0.000299	3	0	0	0	1	NP_524417.1	NP_524417.1	septin 2, isoform A [Drosophila melanogaster]	CG4173	2018-09-02	X	X	X	X	X	X	X	X	1	1	1	1	0	1	4.53	0.00011373	2	9	9	2	0	9	10.5	0.00060598	2	2	2	2	0	2	7.4	0.00017878	X	X	X	X
517	0	0	0.000296	3	0	0	0	2	NP_001259173.1;NP_569981.1	NP_001259173.1	Unc-76, isoform D [Drosophila melanogaster]	CG3981	Unc-76	X	X	X	X	X	X	X	X	2	4	4	2	0	4	15.22	0.00065953	1	1	1	1	0	1	6.57	9.762e-05	1	1	1	1	0	1	8.65	0.0001296	X	X	X	X
518	0	0	0.000263	3	0	0	0	1	NP_477027.1	NP_477027.1	ribonucleoside diphosphate reductase large subunit [Drosophila melanogaster]	CG5371	RnrL	X	X	X	X	X	X	X	X	1	1	1	1	0	1	1.85	5.868e-05	6	17	17	6	0	17	9.73	0.00059064	2	3	3	2	0	3	3.45	0.00013838	X	X	X	X
519	0	0	0.000249	3	0	0	0	5	NP_001138106.1;NP_001262912.1;NP_001262913.1;NP_001262914.1;NP_651248.2	NP_001138106.1	uncharacterized protein CG5746, isoform C [Drosophila melanogaster]	CG5746	CG5746	X	X	X	X	X	X	X	X	2	3	3	2	0	3	2.92	0.00029782	1	5	5	1	0	5	2.92	0.00029387	1	2	2	1	0	2	2.92	0.00015606	X	X	X	X
520	0	0	0.000247	3	0	0	0	1	NP_651312.2	NP_651312.2	mitotic spindle and nuclear protein [Drosophila melanogaster]	CG11120	Mink	X	X	X	X	X	X	X	X	4	6	6	4	0	6	9.28	0.00037919	2	3	3	2	0	3	3.98	0.00011225	2	5	5	2	0	5	3.98	0.00024837	X	X	X	X
521	0	0	0.000234	3	0	0	0	1	NP_610192.1	NP_610192.1	PNGase-like, isoform A [Drosophila melanogaster]	CG7865	Pngl	X	X	X	X	X	X	X	X	1	2	2	1	0	2	3.49	0.00015103	2	3	3	2	0	3	6.5	0.00013413	3	7	7	3	0	7	11.09	0.0004155	X	X	X	X
522	0	0	0.000216	3	0	0	0	1	NP_649594.1	NP_649594.1	Hpr1 [Drosophila melanogaster]	CG2031	Hpr1	X	X	X	X	X	X	X	X	2	4	4	2	0	4	4.85	0.0002719	6	8	8	6	0	8	12.84	0.00032196	1	1	1	1	0	1	2.28	5.343e-05	X	X	X	X
523	0	0	0.000214	3	0	0	0	1	NP_524240.1	NP_524240.1	another transcription unit [Drosophila melanogaster]	CG1433	Atu	X	X	X	X	X	X	X	X	1	7	7	1	0	7	4.41	0.00046008	1	2	2	1	0	2	4.41	7.783e-05	1	2	2	1	0	2	4.41	0.00010332	X	X	X	X
524	0	0	0.000207	3	0	0	0	2	NP_649133.1;NP_730435.2	NP_649133.1	Lon protease, isoform A [Drosophila melanogaster]	CG8798	Lon	X	X	X	X	X	X	X	X	2	8	8	2	0	8	5.07	0.00037894	3	6	6	3	0	6	6.86	0.00016826	1	2	2	1	0	2	3.48	7.446e-05	X	X	X	X
525	0	0	0.000206	3	0	0	0	2	NP_001286535.1;NP_611222.2	NP_001286535.1	uncharacterized protein CG4853, isoform C [Drosophila melanogaster]	CG4853	CG4853	X	X	X	X	X	X	X	X	3	4	4	3	0	4	7.39	0.00027075	4	6	6	4	0	6	10.94	0.00024044	2	2	2	2	0	2	7.1	0.0001064	X	X	X	X
526	0	0	0.000197	3	0	0	0	1	NP_612044.1	NP_612044.1	UDP-galactose 4'-epimerase, isoform A [Drosophila melanogaster]	CG12030	Gale	X	X	X	X	X	X	X	X	1	1	1	1	0	1	7.71	0.00013615	2	3	3	2	0	3	11.14	0.00024181	1	2	2	1	0	2	7.71	0.00021402	X	X	X	X
527	0	0	0.000194	3	0	0	0	1	NP_524069.2	NP_524069.2	mitochondrial phosphate carrier protein 2, isoform A [Drosophila melanogaster]	CG4994	Mpcp	X	X	X	X	X	X	X	X	1	1	1	1	0	1	3.37	0.00013385	1	3	3	1	0	3	3.93	0.00023774	2	2	2	2	0	2	7.3	0.00021042	X	X	X	X
528	0	0	0.00019	3	0	0	0	5	NP_001097873.1;NP_001097874.1;NP_001163691.2;NP_732769.3;NP_788718.3	NP_001097873.1	exchange factor for Arf 6, isoform C [Drosophila melanogaster]	CG31158	Efa6	X	X	X	X	X	X	X	X	2	4	4	2	0	4	3.39	0.00013742	2	4	4	2	0	4	3.1	8.136e-05	6	13	13	6	0	13	8.29	0.00035105	X	X	X	X
529	0	0	0.000189	3	0	0	0	2	NP_572427.1;NP_996366.1	NP_572427.1	lethal (1) G0193, isoform A [Drosophila melanogaster]	CG2206	l(1)G0193	X	X	X	X	X	X	X	X	1	1	1	1	0	1	4.67	7.176e-05	4	9	9	4	0	9	7.83	0.00038239	2	2	2	2	0	2	4.22	0.00011281	X	X	X	X
530	0	0	0.000178	3	0	0	0	5	NP_001033913.1;NP_001246089.1;NP_523601.2;NP_724183.1;NP_724185.1	NP_001033913.1	paxillin, isoform G [Drosophila melanogaster]	CG31794	Pax	X	X	X	X	X	X	X	X	1	1	1	1	0	1	3.61	8.202e-05	2	4	4	2	0	4	7.57	0.00019423	2	4	4	2	0	4	7.57	0.00025786	X	X	X	X
531	0	0	0.000178	3	0	0	0	1	NP_611694.2	NP_611694.2	Ugt58Fa, isoform A [Drosophila melanogaster]	CG4414	Ugt58Fa	X	X	X	X	X	X	X	X	1	1	1	1	0	1	2.84	9.008e-05	4	7	7	4	0	7	12.85	0.00037331	1	1	1	1	0	1	4.73	7.08e-05	X	X	X	X
532	0	0	0.000176	3	0	0	0	7	NP_001260390.1;NP_001260391.1;NP_001260392.1;NP_477243.1;NP_477244.1;NP_477245.1;NP_723687.1	NP_001260390.1	crooked legs, isoform F [Drosophila melanogaster]	CG14938	crol	X	X	X	X	X	X	X	X	1	1	1	1	0	1	2.09	5.254e-05	3	6	6	3	0	6	5.07	0.00018663	2	7	7	2	0	7	4.08	0.00028906	X	X	X	X
533	0	0	0.000161	3	0	0	0	1	NP_477351.1	NP_477351.1	sirtuin 1 [Drosophila melanogaster]	CG5216	Sirt1	X	X	X	X	X	X	X	X	2	3	3	2	0	3	3.4	0.0001737	3	5	5	3	0	5	8.63	0.00017139	2	3	3	2	0	3	4.13	0.00013653	X	X	X	X
534	0	0	0.000157	3	0	0	0	2	NP_001259078.1;NP_726619.2	NP_001259078.1	eIF4E-Transporter, isoform H [Drosophila melanogaster]	CG32016	4E-T	X	X	X	X	X	X	X	X	1	2	2	1	0	2	2.86	9.735e-05	3	5	5	3	0	5	6.54	0.00014408	3	6	6	3	0	6	6.23	0.00022955	X	X	X	X
535	0	0	0.000125	3	0	0	0	1	NP_652018.1	NP_652018.1	cytochrome P450-6a17, isoform A [Drosophila melanogaster]	CG10241	Cyp6a17	X	X	X	X	X	X	X	X	1	1	1	1	0	1	2.79	9.511e-05	1	1	1	1	0	1	2.79	5.631e-05	3	3	3	3	0	3	8.78	0.00022428	X	X	X	X
536	0	0	0.000124	3	0	0	0	2	NP_524448.3;NP_732723.1	NP_524448.3	pyruvate kinase, isoform A [Drosophila melanogaster]	CG7070	PyK	X	X	X	X	X	X	X	X	1	1	1	1	0	1	2.06	8.94e-05	2	4	4	2	0	4	5.44	0.00021172	1	1	1	1	0	1	4.13	7.027e-05	X	X	X	X
537	0	0	0.000122	3	0	0	0	1	NP_524167.1	NP_524167.1	karyopherin alpha1 [Drosophila melanogaster]	CG8548	Kap-alpha1	X	X	X	X	X	X	X	X	1	1	1	1	0	1	3.31	8.776e-05	2	4	4	2	0	4	7.18	0.00020782	1	1	1	1	0	1	3.31	6.898e-05	X	X	X	X
538	0	0	0.00012	3	0	0	0	1	NP_610175.2	NP_610175.2	uncharacterized protein CG1344, isoform A [Drosophila melanogaster]	CG1344	CG1344	X	X	X	X	X	X	X	X	2	3	3	2	0	3	4.54	0.0002093	1	1	1	1	0	1	4.25	4.131e-05	2	2	2	2	0	2	7.03	0.00010968	X	X	X	X
539	0	0	0.000119	3	0	0	0	1	NP_651617.1	NP_651617.1	Glutamine:fructose-6-phosphate aminotransferase 2 [Drosophila melanogaster]	CG1345	Gfat2	X	X	X	X	X	X	X	X	1	1	1	1	0	1	1.76	6.977e-05	2	3	3	2	0	3	3.81	0.00012392	3	3	3	3	0	3	7.47	0.00016451	X	X	X	X
540	0	0	0.000114	3	0	0	0	2	NP_650422.1;NP_731967.2	NP_650422.1	glycogen synthase, isoform B [Drosophila melanogaster]	CG6904	GlyS	X	X	X	X	X	X	X	X	1	1	1	1	0	1	3.48	6.916e-05	2	4	4	2	0	4	6.97	0.00016378	1	2	2	1	0	2	3.48	0.00010872	X	X	X	X
541	0	0	0.000111	3	0	0	0	3	NP_001163326.1;NP_523887.2;NP_728695.1	NP_001163326.1	mutator 2, isoform C [Drosophila melanogaster]	CG1960	mu2	X	X	X	X	X	X	X	X	1	1	1	1	0	1	1.26	3.74e-05	2	4	4	2	0	4	3.06	8.858e-05	3	7	7	3	0	7	3.06	0.00020579	X	X	X	X
542	0	0	0.000106	3	0	0	0	8	NP_001189168.1;NP_001189169.1;NP_001246915.1;NP_001262261.1;NP_477433.2;NP_477434.1;NP_730867.2;NP_788578.1	NP_001189168.1	transforming acidic coiled-coil protein, isoform J [Drosophila melanogaster]	CG9765	tacc	X	X	X	X	X	X	X	X	2	2	2	2	0	2	2.39	7.857e-05	3	5	5	3	0	5	6.27	0.00011629	2	4	4	2	0	4	4.45	0.00012351	X	X	X	X
543	0	0	0.000104	3	0	0	0	6	NP_001014518.1;NP_001014520.2;NP_001303343.1;NP_523686.2;NP_724955.1;NP_724958.1	NP_001014518.1	pipsqueak, isoform K [Drosophila melanogaster]	CG2368	psq	X	X	X	X	X	X	X	X	2	2	2	2	0	2	6.57	0.00014914	1	1	1	1	0	1	2.35	4.415e-05	2	2	2	2	0	2	5.95	0.00011723	X	X	X	X
544	0	0	0.000102	3	0	0	0	15	NP_001014669.1;NP_001014670.2;NP_001163745.1;NP_001163746.1;NP_001163747.1;NP_001247318.1;NP_001247319.1;NP_001247320.1;NP_001247321.1;NP_001247322.1;NP_001262988.1;NP_001262989.1;NP_524754.2;NP_733154.1;NP_733155.2	NP_001014669.1	scribbled, isoform I [Drosophila melanogaster]	CG43398	scrib	X	X	X	X	X	X	X	X	1	1	1	1	0	1	0.99	2.785e-05	2	5	5	2	0	5	2.34	8.244e-05	6	9	9	6	0	9	7.31	0.00019701	X	X	X	X
545	0	0	9.6e-05	3	0	0	0	1	NP_651601.1	NP_651601.1	glycoprotein 93 [Drosophila melanogaster]	CG5520	Gp93	X	X	X	X	X	X	X	X	1	1	1	1	0	1	2.41	6.055e-05	1	1	1	1	0	1	2.41	3.585e-05	3	4	4	3	0	4	6.86	0.00019036	X	X	X	X
546	0	0	8.4e-05	3	0	0	0	7	NP_001014643.1;NP_001262758.1;NP_001262759.1;NP_001262760.1;NP_732516.2;NP_732517.2;NP_996243.1	NP_001014643.1	Signal-transducer and activator of transcription protein at 92E, isoform G [Drosophila melanogaster]	CG4257	Stat92E	X	X	X	X	X	X	X	X	1	2	2	1	0	2	2.05	0.00015008	1	1	1	1	0	1	2.68	4.443e-05	1	1	1	1	0	1	3.15	5.898e-05	X	X	X	X
547	0	0	7.7e-05	3	0	0	0	1	NP_524061.1	NP_524061.1	dynactin 1, p150 subunit [Drosophila melanogaster]	CG9206	DCTN1-p150	X	X	X	X	X	X	X	X	1	1	1	1	0	1	1.19	3.767e-05	3	6	6	3	0	6	5.22	0.00013381	1	2	2	1	0	2	2.45	5.922e-05	X	X	X	X
548	0	0	7.6e-05	3	0	0	0	2	NP_001260416.1;NP_477259.1	NP_001260416.1	eukaryotic translation release factor 3, isoform C [Drosophila melanogaster]	CG6382	Elf	X	X	X	X	X	X	X	X	1	1	1	1	0	1	3.23	9.627e-05	1	1	1	1	0	1	3.23	5.699e-05	1	1	1	1	0	1	1.62	7.567e-05	X	X	X	X
549	0	0	7.3e-05	3	0	0	0	2	NP_001246380.2;NP_611180.1	NP_001246380.2	uncharacterized protein CG8963, isoform E [Drosophila melanogaster]	CG8963	CG8963	X	X	X	X	X	X	X	X	1	1	1	1	0	1	2.69	9.164e-05	1	1	1	1	0	1	2.69	5.425e-05	1	1	1	1	0	1	2.69	7.203e-05	X	X	X	X
550	0	0	7.3e-05	3	0	0	0	1	NP_608534.2	NP_608534.2	splicing factor 3b subunit 1, isoform A [Drosophila melanogaster]	CG2807	CG2807	X	X	X	X	X	X	X	X	1	1	1	1	0	1	1.12	3.556e-05	3	6	6	3	0	6	3.88	0.00012632	1	2	2	1	0	2	1.12	5.59e-05	X	X	X	X
551	0	0	7.1e-05	3	0	0	0	2	NP_001188654.1;NP_573195.1	NP_001188654.1	uncharacterized protein CG5004, isoform B [Drosophila melanogaster]	CG5004	CG5004	X	X	X	X	X	X	X	X	1	2	2	1	0	2	1.05	8.309e-05	2	4	4	2	0	4	4.18	9.838e-05	1	1	1	1	0	1	1.31	3.265e-05	X	X	X	X
552	0	0	6.9e-05	3	0	0	0	4	NP_001246381.1;NP_001286515.1;NP_477317.1;NP_995869.1	NP_001246381.1	Rho guanine nucleotide exchange factor 2, isoform G [Drosophila melanogaster]	CG9635	RhoGEF2	X	X	X	X	X	X	X	X	2	3	3	2	0	3	1.99	5.591e-05	3	7	7	3	0	7	3.25	7.723e-05	3	5	5	3	0	5	3.25	7.324e-05	X	X	X	X
553	0	0	6.6e-05	3	0	0	0	1	NP_609082.1	NP_609082.1	Rat1 5'-3' exoribonuclease, isoform A [Drosophila melanogaster]	CG10354	Rat1	X	X	X	X	X	X	X	X	1	1	1	1	0	1	1.65	5.248e-05	2	2	2	2	0	2	4.52	6.214e-05	1	2	2	1	0	2	1.87	8.25e-05	X	X	X	X
554	0	0	6.6e-05	3	0	0	0	1	NP_609079.2	NP_609079.2	lethal (2) k09022 [Drosophila melanogaster]	CG10805	l(2)k09022	X	X	X	X	X	X	X	X	2	4	4	2	0	4	1.77	9.094e-05	3	4	4	3	0	4	3.58	5.384e-05	2	3	3	2	0	3	2.05	5.361e-05	X	X	X	X
555	0	0	6.2e-05	3	0	0	0	2	NP_724326.1;NP_724327.1	NP_724326.1	mondo, isoform A [Drosophila melanogaster]	CG18362	Mondo	X	X	X	X	X	X	X	X	1	1	1	1	0	1	1.25	4.258e-05	1	3	3	1	0	3	2.59	7.563e-05	1	2	2	1	0	2	2.59	6.694e-05	X	X	X	X
556	0	0	5.7e-05	3	0	0	0	1	NP_477210.1	NP_477210.1	succinate dehydrogenase, subunit A (flavoprotein), isoform A [Drosophila melanogaster]	CG17246	SdhA	X	X	X	X	X	X	X	X	1	1	1	1	0	1	2.42	7.209e-05	1	1	1	1	0	1	2.12	4.268e-05	1	1	1	1	0	1	2.42	5.666e-05	X	X	X	X
557	0	0	5.4e-05	3	0	0	0	3	NP_001247346.1;NP_524998.1;NP_733244.5	NP_001247346.1	La related protein, isoform F [Drosophila melanogaster]	CG42551	larp	X	X	X	X	X	X	X	X	1	2	2	1	0	2	1.28	6.764e-05	1	2	2	1	0	2	0.92	4.004e-05	2	2	2	2	0	2	2.84	5.316e-05	X	X	X	X
558	0	0	5.4e-05	3	0	0	0	3	NP_001097227.2;NP_610342.1;NP_724636.1	NP_001097227.2	Acetyl-CoA carboxylase, isoform E [Drosophila melanogaster]	CG11198	ACC	X	X	X	X	X	X	X	X	2	3	3	2	0	3	1.7	6.088e-05	3	7	7	3	0	7	2.21	8.411e-05	1	1	1	1	0	1	1.06	1.595e-05	X	X	X	X
559	0	0	4.7e-05	3	0	0	0	1	NP_726938.1	NP_726938.1	cap binding protein 80, isoform A [Drosophila melanogaster]	CG7035	Cbp80	X	X	X	X	X	X	X	X	1	1	1	1	0	1	2.88	5.956e-05	1	1	1	1	0	1	1.38	3.526e-05	1	1	1	1	0	1	2.88	4.682e-05	X	X	X	X
560	0	0	4.6e-05	3	0	0	0	1	NP_649710.1	NP_649710.1	uncharacterized protein CG1234 [Drosophila melanogaster]	CG1234	CG1234	X	X	X	X	X	X	X	X	1	1	1	1	0	1	3.04	5.797e-05	1	1	1	1	0	1	3.04	3.432e-05	1	1	1	1	0	1	2.8	4.556e-05	X	X	X	X
561	0	0	2.8e-05	3	0	0	0	1	NP_477287.1	NP_477287.1	nucleoporin 154kD, isoform A [Drosophila melanogaster]	CG4579	Nup154	X	X	X	X	X	X	X	X	1	1	1	1	0	1	0.88	3.491e-05	1	1	1	1	0	1	1.68	2.067e-05	1	1	1	1	0	1	1.1	2.744e-05	X	X	X	X
562	0	0	2.4e-05	3	0	0	0	2	NP_001261809.1;NP_524060.2	NP_001261809.1	hemolectin, isoform B [Drosophila melanogaster]	CG7002	Hml	X	X	X	X	X	X	X	X	2	2	2	2	0	2	0.68	2.481e-05	1	1	1	1	0	1	0.68	7.34e-06	3	4	4	3	0	4	1.38	3.899e-05	X	X	X	X
563	0	0	7e-06	3	0	0	0	1	NP_725339.1	NP_725339.1	short stop, isoform H [Drosophila melanogaster]	CG18076	shot	X	X	X	X	X	X	X	X	1	1	1	1	0	1	0.2	5.41e-06	3	4	4	3	0	4	0.91	1.282e-05	1	1	1	1	0	1	0.22	4.25e-06	X	X	X	X
564	0.002218	1	0.000815	1	0	0	1.79769e+308	1	NP_524519.1	NP_524519.1	histone H2A variant, isoform A [Drosophila melanogaster]	CG5499	His2Av	2	30	30	2	0	30	27.66	0.00221835	X	X	X	X	X	X	X	X	3	5	4	2	1	4.07407	35.46	0.00081515	X	X	X	X	X	X	X	X	X	X	X	X
565	0.001866	1	0.003677	1	0	0	1.79769e+308	3	NP_476603.1;NP_476604.1;NP_996253.1	NP_476603.1	annexin B9, isoform B [Drosophila melanogaster]	CG5730	AnxB9	8	58	58	8	0	58	27.16	0.00186643	7	25	25	7	0	25	26.54	0.00367679	X	X	X	X	X	X	X	X	X	X	X	X	X	X	X	X	X	X	X	X
566	0.001506	1	0.007271	1	0	0	1.79769e+308	1	NP_726482.1	NP_726482.1	epidermal growth factor receptor pathway substrate clone 15, isoform B [Drosophila melanogaster]	CG16932	Eps-15	34	356	0	0	356	178	41.23	0.00150639	37	188	1	1	187	188	44.16	0.00727145	49	551	0	0	551	0	55.11	X	57	508	0	0	508	0	56.17	X	X	X	X	X
567	0.001009	1	0.002635	1	0	0	1.79769e+308	1	NP_609925.1	NP_609925.1	Swiprosin-1, isoform A [Drosophila melanogaster]	CG10641	Swip-1	7	21	21	7	0	21	46.54	0.00100899	5	12	12	5	0	12	33.18	0.00263509	X	X	X	X	X	X	X	X	X	X	X	X	X	X	X	X	X	X	X	X
568	0.000937	1	0.000634	1	0	0	1.79769e+308	1	NP_648985.1	NP_648985.1	Ubiquinol-cytochrome c reductase ubiquinone-binding protein, isoform A [Drosophila melanogaster]	CG7580	UQCR-Q	1	8	8	1	0	8	24.72	0.00093719	X	X	X	X	X	X	X	X	1	2	2	1	0	2	24.72	0.00063397	X	X	X	X	X	X	X	X	X	X	X	X
569	0.000709	1	0.000511	1	0	0	1.79769e+308	1	NP_524426.2	NP_524426.2	cortactin, isoform A [Drosophila melanogaster]	CG3637	Cortactin	7	38	38	7	0	38	18.43	0.00070876	4	6	6	4	0	6	13.95	0.00051146	X	X	X	X	X	X	X	X	X	X	X	X	X	X	X	X	X	X	X	X
570	0.000447	1	0.000681	1	0	0	1.79769e+308	1	NP_523813.1	NP_523813.1	ribosomal protein L23 [Drosophila melanogaster]	CG3661	RpL23	2	6	6	2	0	6	25	0.00044684	1	2	2	1	0	2	10.71	0.00068073	X	X	X	X	X	X	X	X	X	X	X	X	X	X	X	X	X	X	X	X
571	0.000409	1	0.000245	1	0	0	1.79769e+308	1	NP_650608.1	NP_650608.1	deterin [Drosophila melanogaster]	CG12265	Det	1	6	6	1	0	6	10.46	0.00040887	X	X	X	X	X	X	X	X	X	X	X	X	X	X	X	X	1	1	1	1	0	1	10.46	0.0002448	X	X	X	X
572	0.000381	1	6.9e-05	1	0	0	1.79769e+308	1	NP_572414.1	NP_572414.1	uncharacterized protein CG10932, isoform A [Drosophila melanogaster]	CG10932	CG10932	3	15	15	3	0	15	13.41	0.00038145	X	X	X	X	X	X	X	X	1	1	1	1	0	1	2.44	6.881e-05	X	X	X	X	X	X	X	X	X	X	X	X
573	0.000376	1	0.000254	1	0	0	1.79769e+308	1	NP_524687.1	NP_524687.1	ribosomal protein L30, isoform C [Drosophila melanogaster]	CG10652	RpL30	1	4	4	1	0	4	10.81	0.00037572	X	X	X	X	X	X	X	X	1	1	1	1	0	1	10.81	0.00025416	X	X	X	X	X	X	X	X	X	X	X	X
574	0.000372	1	0.001487	1	0	0	1.79769e+308	2	NP_001259164.1;NP_477484.2	NP_001259164.1	alpha actinin, isoform F [Drosophila melanogaster]	CG4376	Actn	8	32	32	8	0	32	12.71	0.00037195	14	28	28	14	0	28	20.62	0.00148744	X	X	X	X	X	X	X	X	X	X	X	X	X	X	X	X	X	X	X	X
575	0.000363	1	0.000414	1	0	0	1.79769e+308	1	NP_722715.1	NP_722715.1	rieske iron-sulfur protein, isoform B [Drosophila melanogaster]	CG7361	RFeSP	2	8	8	2	0	8	18.26	0.00036265	1	2	2	1	0	2	10	0.00041436	X	X	X	X	X	X	X	X	X	X	X	X	X	X	X	X	X	X	X	X
576	0.000332	1	0.000632	1	0	0	1.79769e+308	2	NP_001259705.1;NP_573388.1	NP_001259705.1	lethal (1) G0156, isoform D [Drosophila melanogaster]	CG12233	l(1)G0156	3	12	12	3	0	12	10.88	0.00033187	2	5	5	2	0	5	9.02	0.00063198	X	X	X	X	X	X	X	X	X	X	X	X	X	X	X	X	X	X	X	X
577	0.000316	1	0.000427	1	0	0	1.79769e+308	1	NP_650922.1	NP_650922.1	ribosomal protein S30, isoform A [Drosophila melanogaster]	CG15697	RpS30	1	4	4	1	0	4	7.58	0.00031595	X	X	X	X	X	X	X	X	1	2	2	1	0	2	7.58	0.00042745	X	X	X	X	X	X	X	X	X	X	X	X
578	0.000298	1	0.000202	1	0	0	1.79769e+308	1	NP_650279.1	NP_650279.1	dicarboxylate carrier 1, isoform A [Drosophila melanogaster]	CG8790	Dic1	2	8	8	2	0	8	14.29	0.00029789	X	X	X	X	X	X	X	X	1	2	2	1	0	2	6.07	0.00020151	X	X	X	X	X	X	X	X	X	X	X	X
579	0.00029	1	0.004236	1	0	0	1.79769e+308	2	NP_610059.1;NP_724290.1	NP_610059.1	uncharacterized protein CG9328, isoform A [Drosophila melanogaster]	CG9328	CG9328	1	5	5	1	0	5	6.67	0.00028962	5	16	16	5	0	16	25	0.00423566	X	X	X	X	X	X	X	X	X	X	X	X	X	X	X	X	X	X	X	X
581	0.000276	1	0.000248	1	0	0	1.79769e+308	2	NP_001262161.1;NP_649318.1	NP_001262161.1	uncharacterized protein CG7519, isoform B [Drosophila melanogaster]	CG7519	CG7519	2	4	4	2	0	4	14.57	0.00027619	X	X	X	X	X	X	X	X	X	X	X	X	X	X	X	X	1	1	1	1	0	1	6.62	0.00024804	X	X	X	X
582	0.000266	1	0.000203	1	0	0	1.79769e+308	1	NP_524115.1	NP_524115.1	proteasome beta6 subunit [Drosophila melanogaster]	CG4097	Prosbeta6	1	6	6	1	0	6	7.66	0.0002662	1	1	1	1	0	1	7.66	0.00020277	X	X	X	X	X	X	X	X	X	X	X	X	X	X	X	X	X	X	X	X
583	0.000254	1	7.6e-05	1	0	0	1.79769e+308	1	NP_651000.1	NP_651000.1	isocitrate dehydrogenase 3b, isoform A [Drosophila melanogaster]	CG6439	CG6439	3	9	9	3	0	9	13.51	0.00025361	X	X	X	X	X	X	X	X	1	1	1	1	0	1	4.59	7.625e-05	X	X	X	X	X	X	X	X	X	X	X	X
584	0.000229	1	0.000155	1	0	0	1.79769e+308	1	NP_524742.1	NP_524742.1	mitochondrial ribosomal protein L12 [Drosophila melanogaster]	CG5012	mRpL12	1	4	4	1	0	4	9.89	0.00022915	X	X	X	X	X	X	X	X	1	1	1	1	0	1	9.89	0.00015501	X	X	X	X	X	X	X	X	X	X	X	X
585	0.000203	1	0.000183	1	0	0	1.79769e+308	1	NP_001027236.1	NP_001027236.1	uncharacterized protein CG17768, isoform A [Drosophila melanogaster]	CG17768	CG17768	1	3	3	1	0	3	12.99	0.00020311	X	X	X	X	X	X	X	X	1	1	1	1	0	1	7.79	0.00018319	X	X	X	X	X	X	X	X	X	X	X	X
586	0.000195	1	0.000176	1	0	0	1.79769e+308	1	NP_651360.1	NP_651360.1	nucleoporin 37kD, isoform A [Drosophila melanogaster]	CG11875	Nup37	1	6	6	1	0	6	5.94	0.00019549	X	X	X	X	X	X	X	X	1	2	2	1	0	2	5.94	0.00017632	X	X	X	X	X	X	X	X	X	X	X	X
587	0.000191	1	0.000219	1	0	0	1.79769e+308	1	NP_572405.2	NP_572405.2	Rab39, isoform A [Drosophila melanogaster]	CG12156	Rab39	1	4	4	1	0	4	7.34	0.00019131	1	1	1	1	0	1	7.34	0.00021858	X	X	X	X	X	X	X	X	X	X	X	X	X	X	X	X	X	X	X	X
588	0.00019	1	0.000227	1	0	0	1.79769e+308	1	NP_524819.1	NP_524819.1	ribosomal protein L12, isoform A [Drosophila melanogaster]	CG3195	RpL12	1	3	3	1	0	3	5.45	0.00018957	X	X	X	X	X	X	X	X	X	X	X	X	X	X	X	X	1	1	1	1	0	1	9.09	0.000227	X	X	X	X
589	0.000176	1	0.000158	1	0	0	1.79769e+308	1	NP_609494.1	NP_609494.1	replication factor C 38kD subunit, isoform A [Drosophila melanogaster]	CG6258	RfC38	1	6	6	1	0	6	4.49	0.00017572	X	X	X	X	X	X	X	X	1	2	2	1	0	2	5.34	0.00015849	X	X	X	X	X	X	X	X	X	X	X	X
590	0.000172	1	3.9e-05	1	0	0	1.79769e+308	5	NP_001261783.1;NP_001261784.1;NP_648602.1;NP_729834.1;NP_729835.1	NP_001261783.1	Sin3A-associated protein 130, isoform F [Drosophila melanogaster]	CG11006	Sap130	6	20	20	6	0	20	8.93	0.00017248	1	1	1	1	0	1	1.57	3.941e-05	X	X	X	X	X	X	X	X	X	X	X	X	X	X	X	X	X	X	X	X
591	0.000167	1	6.2e-05	1	0	0	1.79769e+308	1	NP_524063.1	NP_524063.1	heat shock protein cognate 1, isoform A [Drosophila melanogaster]	CG8937	Hsc70-1	3	51	8	1	43	10.243	8.74	0.00016661	X	X	X	X	X	X	X	X	2	6	0	0	6	0	5.3	X	3	7	1	1	6	1.05732	7.64	6.178e-05	X	X	X	X
592	0.000151	1	0.000138	1	0	0	1.79769e+308	1	NP_611597.1	NP_611597.1	Rae1 [Drosophila melanogaster]	CG9862	Rae1	2	5	5	2	0	5	7.23	0.00015067	1	1	1	1	0	1	3.47	0.00013772	X	X	X	X	X	X	X	X	X	X	X	X	X	X	X	X	X	X	X	X
593	0.000147	1	0.000538	1	0	0	1.79769e+308	2	NP_788550.1;NP_788551.1	NP_788550.1	iso glutaminyl cyclase, isoform B [Drosophila melanogaster]	CG5976	isoQC	1	5	5	1	0	5	3.95	0.00014726	1	4	4	1	0	4	3.67	0.00053843	X	X	X	X	X	X	X	X	X	X	X	X	X	X	X	X	X	X	X	X
594	0.000141	1	0.000149	1	0	0	1.79769e+308	1	NP_652671.1	NP_652671.1	caprin, isoform A [Drosophila melanogaster]	CG18811	Capr	6	13	13	6	0	13	12.9	0.00014104	1	3	3	1	0	3	1.46	0.00014876	X	X	X	X	X	X	X	X	X	X	X	X	X	X	X	X	X	X	X	X
595	0.000137	1	0.000371	1	0	0	1.79769e+308	1	NP_476964.1	NP_476964.1	ribosomal protein S18, isoform A [Drosophila melanogaster]	CG8900	RpS18	1	2	2	1	0	2	7.89	0.00013719	X	X	X	X	X	X	X	X	1	2	2	1	0	2	5.26	0.0003712	X	X	X	X	X	X	X	X	X	X	X	X
596	0.000137	1	0.000247	1	0	0	1.79769e+308	1	NP_652608.1	NP_652608.1	pontin [Drosophila melanogaster]	CG4003	pont	3	6	6	3	0	6	9.21	0.00013719	X	X	X	X	X	X	X	X	2	4	4	2	0	4	7.24	0.00024747	X	X	X	X	X	X	X	X	X	X	X	X
597	0.000133	1	0.000192	1	0	0	1.79769e+308	1	NP_648640.1	NP_648640.1	proteome of centrioles 1, isoform A [Drosophila melanogaster]	CG10191	Poc1	2	5	5	2	0	5	6.91	0.00013333	X	X	X	X	X	X	X	X	X	X	X	X	X	X	X	X	1	2	2	1	0	2	6.91	0.00019158	X	X	X	X
598	0.000123	1	0.000561	1	0	0	1.79769e+308	1	NP_652189.1	NP_652189.1	splicing factor 3b subunit 5 [Drosophila melanogaster]	CG11985	CG11985	1	1	1	1	0	1	16.47	0.00012266	1	1	1	1	0	1	15.29	0.0005606	X	X	X	X	X	X	X	X	X	X	X	X	X	X	X	X	X	X	X	X
599	0.000123	1	0.00022	1	0	0	1.79769e+308	8	NP_001162758.1;NP_001259552.1;NP_001259553.1;NP_001259554.1;NP_511157.2;NP_727797.1;NP_727812.2;NP_727814.1	NP_001162758.1	flotillin 2, isoform G [Drosophila melanogaster]	CG32593	Flo2	2	4	4	2	0	4	8.82	0.00012266	X	X	X	X	X	X	X	X	X	X	X	X	X	X	X	X	2	2	2	2	0	2	8.53	0.00022032	X	X	X	X
600	0.000106	1	0.000215	1	0	0	1.79769e+308	1	NP_477025.1	NP_477025.1	pavarotti [Drosophila melanogaster]	CG1258	pav	1	9	9	1	0	9	1.8	0.00010579	3	4	4	3	0	4	5.41	0.00021489	X	X	X	X	X	X	X	X	X	X	X	X	X	X	X	X	X	X	X	X
601	0.000105	1	9.4e-05	1	0	0	1.79769e+308	4	NP_001138203.1;NP_727959.2;NP_727960.1;NP_996485.1	NP_001138203.1	dorsal switch protein 1, isoform F [Drosophila melanogaster]	CG12223	Dsp1	1	4	4	1	0	4	4.53	0.00010505	X	X	X	X	X	X	X	X	X	X	X	X	X	X	X	X	1	1	1	1	0	1	4.53	9.434e-05	X	X	X	X
602	0.000103	1	0.00014	1	0	0	1.79769e+308	1	NP_572722.2	NP_572722.2	ubiquitin activating enzyme 5 [Drosophila melanogaster]	CG1749	CG1749	2	4	4	2	0	4	7.67	0.00010323	X	X	X	X	X	X	X	X	1	2	2	1	0	2	4.7	0.00013966	X	X	X	X	X	X	X	X	X	X	X	X
603	0.000102	1	0.000183	1	0	0	1.79769e+308	1	NP_649858.1	NP_649858.1	proteasome beta3 subunit [Drosophila melanogaster]	CG11981	Prosbeta3	1	2	2	1	0	2	7.8	0.00010172	X	X	X	X	X	X	X	X	X	X	X	X	X	X	X	X	1	1	1	1	0	1	7.8	0.0001827	X	X	X	X
604	0.000102	1	5.8e-05	1	0	0	1.79769e+308	2	NP_001285317.1;NP_727940.1	NP_001285317.1	katanin 80, isoform C [Drosophila melanogaster]	CG13956	kat80	1	8	8	1	0	8	1.83	0.00010197	1	1	1	1	0	1	1.83	5.825e-05	X	X	X	X	X	X	X	X	X	X	X	X	X	X	X	X	X	X	X	X
605	0.0001	1	0.000135	1	0	0	1.79769e+308	3	NP_001260949.1;NP_477039.1;NP_725267.1	NP_001260949.1	DP transcription factor, isoform C [Drosophila melanogaster]	CG4654	Dp	1	4	4	1	0	4	3.6	0.00010001	X	X	X	X	X	X	X	X	1	2	2	1	0	2	6	0.00013531	X	X	X	X	X	X	X	X	X	X	X	X
606	8.9e-05	1	0.000121	1	0	0	1.79769e+308	1	NP_524328.1	NP_524328.1	proteasome alpha2 subunit [Drosophila melanogaster]	CG5266	Prosalpha2	1	2	2	1	0	2	5.56	8.911e-05	X	X	X	X	X	X	X	X	1	1	1	1	0	1	8.97	0.00012056	X	X	X	X	X	X	X	X	X	X	X	X
607	8.8e-05	1	0.000238	1	0	0	1.79769e+308	2	NP_731993.1;NP_731994.1	NP_731993.1	eukaryotic translation initiation factor 2 subunit gamma, isoform B [Drosophila melanogaster]	CG43665	eIF-2gamma	2	4	4	2	0	4	9.47	8.78e-05	X	X	X	X	X	X	X	X	2	4	4	2	0	4	7.16	0.00023757	X	X	X	X	X	X	X	X	X	X	X	X
608	8.8e-05	1	8e-05	1	0	0	1.79769e+308	3	NP_001286075.1;NP_477165.1;NP_995725.1	NP_001286075.1	Numb-associated kinase, isoform E [Drosophila melanogaster]	CG10637	Nak	1	6	6	1	0	6	2.68	8.836e-05	X	X	X	X	X	X	X	X	2	2	2	2	0	2	4.38	7.969e-05	X	X	X	X	X	X	X	X	X	X	X	X
609	8.7e-05	1	0.000593	1	0	0	1.79769e+308	1	NP_001137537.1	NP_001137537.1	yeti, isoform A [Drosophila melanogaster]	CG40218	Yeti	1	2	2	1	0	2	10.37	8.652e-05	2	3	3	2	0	3	16.6	0.00059317	X	X	X	X	X	X	X	X	X	X	X	X	X	X	X	X	X	X	X	X
610	8.7e-05	1	5.7e-05	1	0	0	1.79769e+308	1	NP_609383.2	NP_609383.2	GATAd, isoform A [Drosophila melanogaster]	CG5034	GATAd	1	7	7	1	0	7	2.26	8.668e-05	1	1	1	1	0	1	2.26	5.659e-05	X	X	X	X	X	X	X	X	X	X	X	X	X	X	X	X	X	X	X	X
611	8.5e-05	1	0.000761	1	0	0	1.79769e+308	1	NP_476632.1	NP_476632.1	ribosomal protein S3, isoform A [Drosophila melanogaster]	CG6779	RpS3	1	2	2	1	0	2	4.88	8.477e-05	X	X	X	X	X	X	X	X	X	X	X	X	X	X	X	X	3	5	5	3	0	5	14.63	0.00076127	X	X	X	X
612	8.3e-05	1	0.000378	1	0	0	1.79769e+308	2	NP_524360.2;NP_996216.1	NP_524360.2	tropomyosin 1, isoform A [Drosophila melanogaster]	CG4898	Tm1	1	2	2	1	0	2	6.35	8.275e-05	1	2	2	1	0	2	4.37	0.00037818	X	X	X	X	X	X	X	X	X	X	X	X	X	X	X	X	X	X	X	X
613	8.2e-05	1	0.000148	1	0	0	1.79769e+308	4	NP_001261701.1;NP_001261702.1;NP_001261703.1;NP_648440.2	NP_001261701.1	forkhead box K, isoform N [Drosophila melanogaster]	CG11799	FoxK	2	6	6	2	0	6	5	8.231e-05	X	X	X	X	X	X	X	X	2	4	4	2	0	4	6.05	0.00014848	X	X	X	X	X	X	X	X	X	X	X	X
614	8.1e-05	1	0.000371	1	0	0	1.79769e+308	5	NP_001246483.1;NP_001286777.1;NP_524932.2;NP_995931.1;NP_995932.1	NP_001246483.1	lethal (2) tumorous imaginal discs, isoform D [Drosophila melanogaster]	CG5504	l(2)tid	1	4	4	1	0	4	3.89	8.114e-05	3	4	4	3	0	4	10.12	0.00037083	X	X	X	X	X	X	X	X	X	X	X	X	X	X	X	X	X	X	X	X
615	7.8e-05	1	0.000597	1	0	0	1.79769e+308	2	NP_523365.2;NP_727946.2	NP_523365.2	cabeza, isoform B [Drosophila melanogaster]	CG3606	caz	1	3	3	1	0	3	6.77	7.839e-05	1	5	5	1	0	5	5.76	0.00059713	X	X	X	X	X	X	X	X	X	X	X	X	X	X	X	X	X	X	X	X
616	7.6e-05	1	3.9e-05	1	0	0	1.79769e+308	7	NP_001246783.1;NP_001246784.1;NP_001246785.1;NP_001246786.1;NP_001261919.1;NP_730099.2;NP_730101.2	NP_001246783.1	myosin binding subunit, isoform L [Drosophila melanogaster]	CG32156	Mbs	3	9	9	3	0	9	5.53	7.629e-05	1	1	1	1	0	1	2.68	3.874e-05	X	X	X	X	X	X	X	X	X	X	X	X	X	X	X	X	X	X	X	X
617	7.5e-05	1	0.000342	1	0	0	1.79769e+308	1	NP_649825.1	NP_649825.1	motif 1 binding protein [Drosophila melanogaster]	CG9797	M1BP	2	3	3	2	0	3	5.5	7.483e-05	2	3	3	2	0	3	4.78	0.00034199	X	X	X	X	X	X	X	X	X	X	X	X	X	X	X	X	X	X	X	X
618	7.5e-05	1	6.9e-05	1	0	0	1.79769e+308	1	NP_609356.2	NP_609356.2	uncharacterized protein CG4901, isoform A [Drosophila melanogaster]	CG4901	CG4901	1	5	5	1	0	5	2.16	7.512e-05	1	1	1	1	0	1	2.16	6.866e-05	X	X	X	X	X	X	X	X	X	X	X	X	X	X	X	X	X	X	X	X
619	6.9e-05	1	0.000231	1	0	0	1.79769e+308	4	NP_001137834.2;NP_001162996.2;NP_609835.2;NP_724047.2	NP_001137834.2	cytoplasmic linker protein 190, isoform S [Drosophila melanogaster]	CG5020	CLIP-190	4	11	11	4	0	11	4.6	6.938e-05	2	8	8	2	0	8	2.18	0.00023062	X	X	X	X	X	X	X	X	X	X	X	X	X	X	X	X	X	X	X	X
620	6.9e-05	1	4e-05	1	0	0	1.79769e+308	1	NP_611551.1	NP_611551.1	magi, isoform A [Drosophila melanogaster]	CG30388	Magi	3	8	8	3	0	8	5.24	6.939e-05	1	1	1	1	0	1	1.25	3.964e-05	X	X	X	X	X	X	X	X	X	X	X	X	X	X	X	X	X	X	X	X
621	6.7e-05	1	0.000483	1	0	0	1.79769e+308	1	NP_609649.1	NP_609649.1	ribosomal protein L24, isoform A [Drosophila melanogaster]	CG9282	RpL24	1	1	1	1	0	1	8.39	6.727e-05	X	X	X	X	X	X	X	X	X	X	X	X	X	X	X	X	1	2	2	1	0	2	8.39	0.00048328	X	X	X	X
622	6.5e-05	1	0.000439	1	0	0	1.79769e+308	1	NP_650134.1	NP_650134.1	glutamate carrier 1, isoform A [Drosophila melanogaster]	CG18347	GC1	1	2	2	1	0	2	6.54	6.496e-05	X	X	X	X	X	X	X	X	1	5	5	1	0	5	6.54	0.00043943	X	X	X	X	X	X	X	X	X	X	X	X
623	6.5e-05	1	4.4e-05	1	0	0	1.79769e+308	1	NP_572253.2	NP_572253.2	integrator 6, isoform A [Drosophila melanogaster]	CG3125	IntS6	1	8	8	1	0	8	1.17	6.496e-05	X	X	X	X	X	X	X	X	1	2	2	1	0	2	1.17	4.394e-05	X	X	X	X	X	X	X	X	X	X	X	X
624	6.5e-05	1	3.9e-05	1	0	0	1.79769e+308	13	NP_001163648.1;NP_001262712.1;NP_524397.2;NP_732344.1;NP_732345.1;NP_732346.1;NP_732347.1;NP_732348.1;NP_732349.1;NP_732350.1;NP_996236.1;NP_996237.1;NP_996238.1	NP_001163648.1	fruitless, isoform N [Drosophila melanogaster]	CG14307	fru	1	6	6	1	0	6	2.71	6.516e-05	X	X	X	X	X	X	X	X	X	X	X	X	X	X	X	X	1	1	1	1	0	1	2.71	3.901e-05	X	X	X	X
625	6.4e-05	1	0.000147	1	0	0	1.79769e+308	1	NP_572952.1	NP_572952.1	mRNA-capping-enzyme [Drosophila melanogaster]	CG1810	mRNA-cap	3	4	4	3	0	4	5.39	6.426e-05	2	2	2	2	0	2	3.08	0.00014685	X	X	X	X	X	X	X	X	X	X	X	X	X	X	X	X	X	X	X	X
626	6.4e-05	1	9.8e-05	1	0	0	1.79769e+308	1	NP_572331.2	NP_572331.2	pickled eggs, isoform A [Drosophila melanogaster]	CG3973	pigs	1	6	6	1	0	6	1.33	6.403e-05	1	2	2	1	0	2	1.33	9.755e-05	X	X	X	X	X	X	X	X	X	X	X	X	X	X	X	X	X	X	X	X
627	6.4e-05	1	4.3e-05	1	0	0	1.79769e+308	3	NP_524592.2;NP_733357.1;NP_788768.1	NP_524592.2	headcase, isoform A [Drosophila melanogaster]	CG15532	hdc	1	4	4	1	0	4	2.15	6.416e-05	X	X	X	X	X	X	X	X	1	1	1	1	0	1	2.15	4.34e-05	X	X	X	X	X	X	X	X	X	X	X	X
628	6.3e-05	1	8.9e-05	1	0	0	1.79769e+308	1	NP_001260999.1	NP_001260999.1	kinesin heavy chain 73, isoform D [Drosophila melanogaster]	CG8183	Khc-73	4	23	0	0	23	11.5	3.93	6.284e-05	3	5	0	0	5	0	2.88	X	8	16	1	1	15	6	7.97	8.872e-05	9	18	0	0	18	0	8.75	X	X	X	X	X
629	5.8e-05	1	0.000236	1	0	0	1.79769e+308	2	NP_649301.1;NP_730617.1	NP_649301.1	uncharacterized protein CG11309, isoform A [Drosophila melanogaster]	CG11309	CG11309	1	2	2	1	0	2	2.79	5.825e-05	X	X	X	X	X	X	X	X	3	3	3	3	0	3	12.85	0.00023641	X	X	X	X	X	X	X	X	X	X	X	X
630	5.6e-05	1	0.000227	1	0	0	1.79769e+308	1	NP_650248.1	NP_650248.1	uncharacterized protein CG7488 [Drosophila melanogaster]	CG7488	CG7488	1	2	2	1	0	2	3.49	5.59e-05	X	X	X	X	X	X	X	X	2	3	3	2	0	3	9.38	0.0002269	X	X	X	X	X	X	X	X	X	X	X	X
631	5.6e-05	1	6.4e-05	1	0	0	1.79769e+308	1	NP_572530.1	NP_572530.1	brahma associated protein 111kD [Drosophila melanogaster]	CG7055	Bap111	1	4	4	1	0	4	4.67	5.568e-05	1	1	1	1	0	1	4.67	6.362e-05	X	X	X	X	X	X	X	X	X	X	X	X	X	X	X	X	X	X	X	X
632	5.2e-05	1	3.5e-05	1	0	0	1.79769e+308	2	NP_722663.1;NP_722665.1	NP_722663.1	arouser, isoform A [Drosophila melanogaster]	CG4276	aru	1	4	4	1	0	4	2.61	5.181e-05	X	X	X	X	X	X	X	X	1	1	1	1	0	1	2.61	3.505e-05	X	X	X	X	X	X	X	X	X	X	X	X
633	5e-05	1	0.000409	1	0	0	1.79769e+308	1	NP_647991.1	NP_647991.1	mad2 [Drosophila melanogaster]	CG17498	mad2	1	1	1	1	0	1	4.83	5.037e-05	X	X	X	X	X	X	X	X	3	3	3	3	0	3	17.87	0.00040886	X	X	X	X	X	X	X	X	X	X	X	X
634	5e-05	1	0.000119	1	0	0	1.79769e+308	1	NP_649326.1	NP_649326.1	uncharacterized protein CG7611, isoform A [Drosophila melanogaster]	CG7611	CG7611	1	3	3	1	0	3	2.22	4.965e-05	X	X	X	X	X	X	X	X	X	X	X	X	X	X	X	X	1	2	2	1	0	2	2.22	0.0001189	X	X	X	X
635	5e-05	1	8.9e-05	1	0	0	1.79769e+308	5	NP_001036268.2;NP_001162717.1;NP_001245616.1;NP_511111.1;NP_727451.1	NP_001036268.2	IGF-II mRNA-binding protein, isoform K [Drosophila melanogaster]	CG1691	Imp	2	3	3	2	0	3	3.8	4.957e-05	X	X	X	X	X	X	X	X	2	2	2	2	0	2	7.13	8.942e-05	X	X	X	X	X	X	X	X	X	X	X	X
636	5e-05	1	3.3e-05	1	0	0	1.79769e+308	1	NP_728981.1	NP_728981.1	claspin, isoform A [Drosophila melanogaster]	CG32251	Claspin	1	7	7	1	0	7	1.3	4.982e-05	1	1	1	1	0	1	1.23	3.253e-05	X	X	X	X	X	X	X	X	X	X	X	X	X	X	X	X	X	X	X	X
637	4.8e-05	1	0.00011	1	0	0	1.79769e+308	1	NP_477509.1	NP_477509.1	Sex combs extra [Drosophila melanogaster]	CG5595	Sce	1	2	2	1	0	2	4.37	4.794e-05	1	1	1	1	0	1	3.68	0.00010954	X	X	X	X	X	X	X	X	X	X	X	X	X	X	X	X	X	X	X	X
638	4.7e-05	1	7.1e-05	1	0	0	1.79769e+308	1	NP_649864.2	NP_649864.2	lysine (K)-specific demethylase 2, isoform B [Drosophila melanogaster]	CG11033	Kdm2	3	6	6	3	0	6	2.6	4.651e-05	1	2	2	1	0	2	1.04	7.086e-05	X	X	X	X	X	X	X	X	X	X	X	X	X	X	X	X	X	X	X	X
639	4.4e-05	1	6.7e-05	1	0	0	1.79769e+308	1	NP_610455.1	NP_610455.1	mystery 45A [Drosophila melanogaster]	CG8070	Mys45A	1	3	3	1	0	3	1.97	4.393e-05	1	1	1	1	0	1	2.81	6.693e-05	X	X	X	X	X	X	X	X	X	X	X	X	X	X	X	X	X	X	X	X
640	4.3e-05	1	0.000153	1	0	0	1.79769e+308	1	NP_523941.2	NP_523941.2	ribosomal protein S6 kinase, isoform A [Drosophila melanogaster]	CG10539	S6k	1	2	2	1	0	2	2.45	4.256e-05	X	X	X	X	X	X	X	X	X	X	X	X	X	X	X	X	1	2	2	1	0	2	3.67	0.00015287	X	X	X	X
641	4.3e-05	1	6.5e-05	1	0	0	1.79769e+308	7	NP_001096873.1;NP_001138152.1;NP_001138153.1;NP_001138155.1;NP_001259220.1;NP_570073.3;NP_996343.5	NP_001096873.1	Tousled-like kinase, isoform B [Drosophila melanogaster]	CG34412	Tlk	2	6	6	2	0	6	2.19	4.276e-05	2	2	2	2	0	2	1.64	6.514e-05	X	X	X	X	X	X	X	X	X	X	X	X	X	X	X	X	X	X	X	X
642	4.2e-05	1	0.000484	1	0	0	1.79769e+308	1	NP_573014.2	NP_573014.2	uncharacterized protein CG5877, isoform A [Drosophila melanogaster]	CG5877	CG5877	2	4	4	2	0	4	2.95	4.238e-05	7	10	10	7	0	10	10.87	0.00048426	X	X	X	X	X	X	X	X	X	X	X	X	X	X	X	X	X	X	X	X
643	4.2e-05	1	0.000149	1	0	0	1.79769e+308	1	NP_608884.1	NP_608884.1	synthesis of cytochrome c oxidase [Drosophila melanogaster]	CG8885	Scox	1	1	1	1	0	1	7.17	4.154e-05	X	X	X	X	X	X	X	X	X	X	X	X	X	X	X	X	1	1	1	1	0	1	12.35	0.00014922	X	X	X	X
644	4.2e-05	1	4.8e-05	1	0	0	1.79769e+308	1	NP_569958.2	NP_569958.2	Myb-interacting protein 130 [Drosophila melanogaster]	CG3480	mip130	1	4	4	1	0	4	1.42	4.23e-05	1	1	1	1	0	1	2.03	4.833e-05	X	X	X	X	X	X	X	X	X	X	X	X	X	X	X	X	X	X	X	X
645	4.1e-05	1	0.00011	1	0	0	1.79769e+308	1	NP_650942.1	NP_650942.1	secretory 15 [Drosophila melanogaster]	CG7034	Sec15	1	3	3	1	0	3	1.7	4.083e-05	X	X	X	X	X	X	X	X	1	3	3	1	0	3	1.96	0.00011049	X	X	X	X	X	X	X	X	X	X	X	X
646	4e-05	1	0.000182	1	0	0	1.79769e+308	1	NP_524654.2	NP_524654.2	splicing factor 1, isoform A [Drosophila melanogaster]	CG5836	SF1	2	3	3	2	0	3	4.45	3.974e-05	1	3	3	1	0	3	2.29	0.00018164	X	X	X	X	X	X	X	X	X	X	X	X	X	X	X	X	X	X	X	X
647	4e-05	1	4.6e-05	1	0	0	1.79769e+308	4	NP_001163716.1;NP_001163717.1;NP_524492.2;NP_733063.1	NP_001163716.1	slingshot, isoform C [Drosophila melanogaster]	CG6238	ssh	1	4	4	1	0	4	1.72	3.987e-05	1	1	1	1	0	1	1.63	4.556e-05	X	X	X	X	X	X	X	X	X	X	X	X	X	X	X	X	X	X	X	X
648	3.9e-05	1	8.9e-05	1	0	0	1.79769e+308	1	NP_572524.1	NP_572524.1	chaperonin containing TCP1 subunit 2 [Drosophila melanogaster]	CG7033	CG7033	1	2	2	1	0	2	4.67	3.898e-05	1	1	1	1	0	1	2.8	8.907e-05	X	X	X	X	X	X	X	X	X	X	X	X	X	X	X	X	X	X	X	X
649	3.9e-05	1	5.3e-05	1	0	0	1.79769e+308	2	FBpp0422972;NP_524660.1	FBpp0422972	sbr-PC FBpp0422972 CG1664-PC length=536 release=r6.22 species=Dmel			1	2	2	1	0	2	2.8	3.89e-05	X	X	X	X	X	X	X	X	1	1	1	1	0	1	5.78	5.263e-05	X	X	X	X	X	X	X	X	X	X	X	X
650	3.9e-05	1	3.5e-05	1	0	0	1.79769e+308	1	NP_611862.1	NP_611862.1	morula [Drosophila melanogaster]	CG3060	mr	1	3	3	1	0	3	2.37	3.9e-05	X	X	X	X	X	X	X	X	1	1	1	1	0	1	3.12	3.518e-05	X	X	X	X	X	X	X	X	X	X	X	X
651	3.8e-05	1	3.4e-05	1	0	0	1.79769e+308	1	NP_649851.1	NP_649851.1	uncharacterized protein CG11970, isoform A [Drosophila melanogaster]	CG11970	CG11970	3	6	6	3	0	6	2.71	3.773e-05	X	X	X	X	X	X	X	X	1	2	2	1	0	2	2.29	3.403e-05	X	X	X	X	X	X	X	X	X	X	X	X
652	3.6e-05	1	0.000165	1	0	0	1.79769e+308	3	NP_001163576.1;NP_649941.3;NP_731402.3	NP_001163576.1	uncharacterized protein CG8478, isoform D [Drosophila melanogaster]	CG8478	CG8478	1	2	2	1	0	2	2.78	3.62e-05	2	2	2	2	0	2	4.34	0.00016546	X	X	X	X	X	X	X	X	X	X	X	X	X	X	X	X	X	X	X	X
653	3.6e-05	1	6.4e-05	1	0	0	1.79769e+308	2	NP_001286258.1;NP_610531.1	NP_001286258.1	secretory 24AB, isoform C [Drosophila melanogaster]	CG1472	Sec24AB	1	4	4	1	0	4	1.46	3.589e-05	X	X	X	X	X	X	X	X	X	X	X	X	X	X	X	X	2	2	2	2	0	2	2.5	6.447e-05	X	X	X	X
654	3.6e-05	1	4.9e-05	1	0	0	1.79769e+308	1	NP_608349.1	NP_608349.1	uncharacterized protein CG14230 [Drosophila melanogaster]	CG14230	CG14230	1	2	2	1	0	2	1.55	3.595e-05	X	X	X	X	X	X	X	X	1	1	1	1	0	1	3.62	4.864e-05	X	X	X	X	X	X	X	X	X	X	X	X
655	3.6e-05	1	3.2e-05	1	0	0	1.79769e+308	3	NP_001285375.1;NP_573221.2;NP_728083.2	NP_001285375.1	ankyrin repeat and LEM domain containing 2, isoform G [Drosophila melanogaster]	CG8465	Ankle2	1	4	4	1	0	4	1.63	3.568e-05	X	X	X	X	X	X	X	X	X	X	X	X	X	X	X	X	1	1	1	1	0	1	1.63	3.204e-05	X	X	X	X
656	3.4e-05	1	0.000104	1	0	0	1.79769e+308	1	NP_648367.1	NP_648367.1	uncharacterized protein CG8108, isoform B [Drosophila melanogaster]	CG8108	CG8108	1	3	3	1	0	3	2.29	3.404e-05	1	2	2	1	0	2	1.09	0.0001037	X	X	X	X	X	X	X	X	X	X	X	X	X	X	X	X	X	X	X	X
657	3.4e-05	1	4.6e-05	1	0	0	1.79769e+308	1	NP_523489.1	NP_523489.1	myotubularin, isoform A [Drosophila melanogaster]	CG9115	mtm	1	2	2	1	0	2	2.1	3.369e-05	X	X	X	X	X	X	X	X	1	1	1	1	0	1	2.75	4.558e-05	X	X	X	X	X	X	X	X	X	X	X	X
658	3.4e-05	1	2.2e-05	1	0	0	1.79769e+308	4	NP_001261017.1;NP_476727.1;NP_476728.1;NP_476729.1	NP_001261017.1	slit, isoform F [Drosophila melanogaster]	CG43758	sli	2	7	7	2	0	7	1.53	3.384e-05	1	1	1	1	0	1	0.93	2.209e-05	X	X	X	X	X	X	X	X	X	X	X	X	X	X	X	X	X	X	X	X
659	3.3e-05	1	9e-05	1	0	0	1.79769e+308	1	NP_610094.1	NP_610094.1	nibbler [Drosophila melanogaster]	CG9247	Nbr	1	2	2	1	0	2	1.92	3.336e-05	X	X	X	X	X	X	X	X	2	2	2	2	0	2	5.12	9.028e-05	X	X	X	X	X	X	X	X	X	X	X	X
660	3.3e-05	1	4.5e-05	1	0	0	1.79769e+308	3	NP_001261923.1;NP_648839.1;NP_788510.1	NP_001261923.1	Zinc-finger protein at 72D, isoform E [Drosophila melanogaster]	CG5215	Zn72D	1	2	2	1	0	2	2.38	3.305e-05	X	X	X	X	X	X	X	X	1	1	1	1	0	1	2.06	4.471e-05	X	X	X	X	X	X	X	X	X	X	X	X
661	3.3e-05	1	2.2e-05	1	0	0	1.79769e+308	5	NP_001262680.1;NP_001262681.1;NP_524392.2;NP_732263.1;NP_996228.1	NP_001262680.1	osa, isoform E [Drosophila melanogaster]	CG7467	osa	2	8	8	2	0	8	1.25	3.265e-05	X	X	X	X	X	X	X	X	1	2	2	1	0	2	0.39	2.208e-05	X	X	X	X	X	X	X	X	X	X	X	X
662	3.2e-05	1	2.9e-05	1	0	0	1.79769e+308	2	NP_001163135.1;NP_995827.2	NP_001163135.1	chromosome associated protein G, isoform G [Drosophila melanogaster]	CG34438	Cap-G	1	4	4	1	0	4	1.39	3.211e-05	X	X	X	X	X	X	X	X	X	X	X	X	X	X	X	X	1	1	1	1	0	1	1.92	2.883e-05	X	X	X	X
663	3.1e-05	1	8.5e-05	1	0	0	1.79769e+308	1	NP_609399.1	NP_609399.1	replication factor C subunit 3 [Drosophila melanogaster]	CG5313	RfC3	1	1	1	1	0	1	3.01	3.14e-05	X	X	X	X	X	X	X	X	1	1	1	1	0	1	5.12	8.497e-05	X	X	X	X	X	X	X	X	X	X	X	X
664	3.1e-05	1	4.2e-05	1	0	0	1.79769e+308	1	NP_001188923.1	NP_001188923.1	uncharacterized protein CG6701, isoform B [Drosophila melanogaster]	CG6701	CG6701	1	4	4	1	0	4	1.65	3.129e-05	X	X	X	X	X	X	X	X	2	2	2	2	0	2	3.68	4.233e-05	X	X	X	X	X	X	X	X	X	X	X	X
665	3e-05	1	2.7e-05	1	0	0	1.79769e+308	1	NP_649430.1	NP_649430.1	brother of Yb [Drosophila melanogaster]	CG11133	BoYb	2	3	3	2	0	3	2.27	2.954e-05	X	X	X	X	X	X	X	X	1	1	1	1	0	1	1.42	2.664e-05	X	X	X	X	X	X	X	X	X	X	X	X
666	2.9e-05	1	7.9e-05	1	0	0	1.79769e+308	1	NP_649314.2	NP_649314.2	uncharacterized protein CG5664, isoform A [Drosophila melanogaster]	CG5664	CG5664	1	2	2	1	0	2	1.69	2.933e-05	X	X	X	X	X	X	X	X	1	2	2	1	0	2	2.67	7.936e-05	X	X	X	X	X	X	X	X	X	X	X	X
667	2.9e-05	1	6.7e-05	1	0	0	1.79769e+308	1	NP_651593.1	NP_651593.1	uncharacterized protein CG5003 [Drosophila melanogaster]	CG5003	CG5003	1	2	2	1	0	2	2.66	2.925e-05	1	1	1	1	0	1	1.82	6.683e-05	X	X	X	X	X	X	X	X	X	X	X	X	X	X	X	X	X	X	X	X
668	2.8e-05	1	8.6e-05	1	0	0	1.79769e+308	1	NP_730449.1	NP_730449.1	sterol regulatory element binding protein, isoform A [Drosophila melanogaster]	CG8522	SREBP	1	3	3	1	0	3	1.44	2.81e-05	1	2	2	1	0	2	2.07	8.563e-05	X	X	X	X	X	X	X	X	X	X	X	X	X	X	X	X	X	X	X	X
669	2.7e-05	1	0.000554	1	0	0	1.79769e+308	1	NP_477297.1	NP_477297.1	D19B [Drosophila melanogaster]	CG10270	D19B	1	2	2	1	0	2	1.55	2.694e-05	3	9	9	3	0	9	8.4	0.00055408	X	X	X	X	X	X	X	X	X	X	X	X	X	X	X	X	X	X	X	X
670	2.7e-05	1	0.000148	1	0	0	1.79769e+308	2	NP_648658.1;NP_729916.1	NP_648658.1	Tondu-domain-containing growth inhibitor, isoform B [Drosophila melanogaster]	CG10741	Tgi	1	1	1	1	0	1	4.45	2.729e-05	X	X	X	X	X	X	X	X	1	2	2	1	0	2	8.12	0.0001477	X	X	X	X	X	X	X	X	X	X	X	X
671	2.6e-05	1	2.4e-05	1	0	0	1.79769e+308	1	NP_650530.2	NP_650530.2	maternal transcript 89Ba [Drosophila melanogaster]	CG12785	Mat89Ba	1	3	3	1	0	3	1.26	2.622e-05	X	X	X	X	X	X	X	X	1	1	1	1	0	1	2.77	2.365e-05	X	X	X	X	X	X	X	X	X	X	X	X
672	2.5e-05	1	9e-05	1	0	0	1.79769e+308	2	NP_611086.1;NP_725534.1	NP_611086.1	glutamate oxaloacetate transaminase 1, isoform A [Drosophila melanogaster]	CG8430	Got1	1	1	1	1	0	1	3.37	2.506e-05	X	X	X	X	X	X	X	X	X	X	X	X	X	X	X	X	1	1	1	1	0	1	2.88	9.003e-05	X	X	X	X
673	2.4e-05	1	0.00013	1	0	0	1.79769e+308	1	NP_477473.1	NP_477473.1	regulatory particle triple-A ATPase 1 [Drosophila melanogaster]	CG1341	Rpt1	1	1	1	1	0	1	2.77	2.408e-05	X	X	X	X	X	X	X	X	2	2	2	2	0	2	7.62	0.00013031	X	X	X	X	X	X	X	X	X	X	X	X
674	2.4e-05	1	1.6e-05	1	0	0	1.79769e+308	3	NP_001096905.1;NP_001259329.1;NP_511084.2	NP_001096905.1	TATA box binding protein-related factor 2, isoform E [Drosophila melanogaster]	CG18009	Trf2	1	4	4	1	0	4	0.76	2.432e-05	X	X	X	X	X	X	X	X	1	1	1	1	0	1	1.87	1.645e-05	X	X	X	X	X	X	X	X	X	X	X	X
675	2.3e-05	1	5.3e-05	1	0	0	1.79769e+308	2	NP_001027403.2;NP_001163114.1	NP_001027403.2	peroxin 6, isoform D [Drosophila melanogaster]	CG11919	Pex6	1	2	2	1	0	2	1.45	2.32e-05	1	1	1	1	0	1	2.11	5.3e-05	X	X	X	X	X	X	X	X	X	X	X	X	X	X	X	X	X	X	X	X
676	2.3e-05	1	5.2e-05	1	0	0	1.79769e+308	5	NP_001188952.1;NP_001261018.1;NP_001261019.1;NP_523754.2;NP_725509.2	NP_001188952.1	Stretchin-Mlck, isoform M [Drosophila melanogaster]	CG44162	Strn-Mlck	1	2	2	1	0	2	1.31	2.284e-05	1	1	1	1	0	1	3.07	5.219e-05	X	X	X	X	X	X	X	X	X	X	X	X	X	X	X	X	X	X	X	X
677	2.3e-05	1	3.2e-05	1	0	0	1.79769e+308	1	NP_648976.2	NP_648976.2	secretory 3 [Drosophila melanogaster]	CG3885	Sec3	2	2	2	2	0	2	3.49	2.346e-05	X	X	X	X	X	X	X	X	1	1	1	1	0	1	2.36	3.173e-05	X	X	X	X	X	X	X	X	X	X	X	X
678	2.1e-05	1	0.000379	1	0	0	1.79769e+308	1	NP_788697.1	NP_788697.1	syndapin, isoform B [Drosophila melanogaster]	CG33094	Synd	1	1	1	1	0	1	3.24	2.111e-05	X	X	X	X	X	X	X	X	X	X	X	X	X	X	X	X	3	5	5	3	0	5	11.74	0.00037909	X	X	X	X
679	2.1e-05	1	0.00015	1	0	0	1.79769e+308	1	NP_476971.1	NP_476971.1	pelle, isoform A [Drosophila melanogaster]	CG5974	pll	1	1	1	1	0	1	2.59	2.081e-05	X	X	X	X	X	X	X	X	X	X	X	X	X	X	X	X	1	2	2	1	0	2	4.99	0.00014952	X	X	X	X
680	2.1e-05	1	0.000113	1	0	0	1.79769e+308	1	NP_649916.1	NP_649916.1	P58IPK [Drosophila melanogaster]	CG8286	P58IPK	1	1	1	1	0	1	3.61	2.094e-05	X	X	X	X	X	X	X	X	2	2	2	2	0	2	11.85	0.0001133	X	X	X	X	X	X	X	X	X	X	X	X
681	2e-05	1	9.3e-05	1	0	0	1.79769e+308	1	NP_477504.1	NP_477504.1	glutactin, isoform A [Drosophila melanogaster]	CG9280	Glt	1	2	2	1	0	2	1.17	2.032e-05	1	2	2	1	0	2	2.44	9.289e-05	X	X	X	X	X	X	X	X	X	X	X	X	X	X	X	X	X	X	X	X
682	2e-05	1	7.4e-05	1	0	0	1.79769e+308	1	NP_726016.1	NP_726016.1	uncharacterized protein CG30291 [Drosophila melanogaster]	CG30291	CG30291	1	1	1	1	0	1	4.32	2.048e-05	X	X	X	X	X	X	X	X	X	X	X	X	X	X	X	X	1	1	1	1	0	1	2.55	7.358e-05	X	X	X	X
683	2e-05	1	4.5e-05	1	0	0	1.79769e+308	3	NP_476850.1;NP_733401.3;NP_733402.1	NP_476850.1	Zn finger homeodomain 1, isoform B [Drosophila melanogaster]	CG1322	zfh1	1	2	2	1	0	2	1.14	1.978e-05	1	1	1	1	0	1	1.71	4.521e-05	X	X	X	X	X	X	X	X	X	X	X	X	X	X	X	X	X	X	X	X
684	2e-05	1	2.8e-05	1	0	0	1.79769e+308	1	NP_608633.1	NP_608633.1	uncharacterized protein CG15356 [Drosophila melanogaster]	CG15356	CG15356	1	2	2	1	0	2	1.47	2.038e-05	X	X	X	X	X	X	X	X	1	1	1	1	0	1	2.44	2.758e-05	X	X	X	X	X	X	X	X	X	X	X	X
685	1.9e-05	1	0.000178	1	0	0	1.79769e+308	2	NP_523732.2;NP_725327.1	NP_523732.2	female lethal d, isoform A [Drosophila melanogaster]	CG6315	fl(2)d	1	1	1	1	0	1	2.05	1.945e-05	1	2	2	1	0	2	2.61	0.0001778	X	X	X	X	X	X	X	X	X	X	X	X	X	X	X	X	X	X	X	X
686	1.9e-05	1	0.000151	1	0	0	1.79769e+308	1	NP_609378.1	NP_609378.1	uncharacterized protein CG4972 [Drosophila melanogaster]	CG4972	CG4972	1	1	1	1	0	1	2.85	1.859e-05	X	X	X	X	X	X	X	X	2	3	3	2	0	3	4.63	0.00015086	X	X	X	X	X	X	X	X	X	X	X	X
687	1.9e-05	1	0.000101	1	0	0	1.79769e+308	1	NP_610137.1	NP_610137.1	Chromatin-linked adaptor for MSL proteins, isoform A [Drosophila melanogaster]	CG1832	Clamp	1	1	1	1	0	1	4.63	1.859e-05	X	X	X	X	X	X	X	X	2	2	2	2	0	2	7.13	0.00010058	X	X	X	X	X	X	X	X	X	X	X	X
688	1.9e-05	1	4.3e-05	1	0	0	1.79769e+308	1	NP_730163.1	NP_730163.1	RING-associated factor 2, isoform A [Drosophila melanogaster]	CG4877	RAF2	1	2	2	1	0	2	1.07	1.867e-05	1	1	1	1	0	1	1.43	4.266e-05	X	X	X	X	X	X	X	X	X	X	X	X	X	X	X	X	X	X	X	X
689	1.7e-05	1	6.2e-05	1	0	0	1.79769e+308	1	NP_542438.1	NP_542438.1	uncharacterized protein CG3430 [Drosophila melanogaster]	CG3430	CG3430	1	1	1	1	0	1	1.65	1.723e-05	X	X	X	X	X	X	X	X	X	X	X	X	X	X	X	X	1	1	1	1	0	1	2.31	6.191e-05	X	X	X	X
690	1.7e-05	1	4.6e-05	1	0	0	1.79769e+308	1	NP_611856.1	NP_611856.1	thoc5 [Drosophila melanogaster]	CG2980	thoc5	1	1	1	1	0	1	1.79	1.693e-05	X	X	X	X	X	X	X	X	1	1	1	1	0	1	3.41	4.58e-05	X	X	X	X	X	X	X	X	X	X	X	X
691	1.6e-05	1	4.4e-05	1	0	0	1.79769e+308	1	NP_001034055.1	NP_001034055.1	kibra, isoform A [Drosophila melanogaster]	CG33967	kibra	1	2	2	1	0	2	0.93	1.619e-05	X	X	X	X	X	X	X	X	2	2	2	2	0	2	3.49	4.381e-05	X	X	X	X	X	X	X	X	X	X	X	X
692	1.5e-05	1	8.2e-05	1	0	0	1.79769e+308	1	NP_651092.1	NP_651092.1	vreteno [Drosophila melanogaster]	CG4771	vret	1	1	1	1	0	1	1.16	1.509e-05	X	X	X	X	X	X	X	X	1	2	2	1	0	2	1.3	8.165e-05	X	X	X	X	X	X	X	X	X	X	X	X
693	1.5e-05	1	6.8e-05	1	0	0	1.79769e+308	1	NP_477118.1	NP_477118.1	crooked neck [Drosophila melanogaster]	CG3193	crn	1	1	1	1	0	1	3.28	1.485e-05	1	1	1	1	0	1	4.27	6.788e-05	X	X	X	X	X	X	X	X	X	X	X	X	X	X	X	X	X	X	X	X
694	1.5e-05	1	3.4e-05	1	0	0	1.79769e+308	6	NP_001036374.1;NP_001163040.1;NP_001286126.1;NP_001286127.1;NP_724359.1;NP_724360.1	NP_001036374.1	no long nerve cord, isoform C [Drosophila melanogaster]	CG31619	nolo	1	2	2	1	0	2	1	1.496e-05	1	1	1	1	0	1	1.51	3.418e-05	X	X	X	X	X	X	X	X	X	X	X	X	X	X	X	X	X	X	X	X
695	1.5e-05	1	1.8e-05	1	0	0	1.79769e+308	1	NP_524881.2	NP_524881.2	mutagen-sensitive 205 [Drosophila melanogaster]	CG1925	mus205	1	3	3	1	0	3	0.89	1.468e-05	X	X	X	X	X	X	X	X	X	X	X	X	X	X	X	X	1	1	1	1	0	1	0.75	1.758e-05	X	X	X	X
696	1.4e-05	1	6.6e-05	1	0	0	1.79769e+308	3	NP_001036715.1;NP_732108.2;NP_732109.2	NP_001036715.1	myosin heavy chain-like, isoform G [Drosophila melanogaster]	CG31045	Mhcl	2	3	3	2	0	3	1.44	1.448e-05	2	3	3	2	0	3	2.08	6.618e-05	X	X	X	X	X	X	X	X	X	X	X	X	X	X	X	X	X	X	X	X
697	1.4e-05	1	7e-06	1	0	0	1.79769e+308	1	NP_476986.1	NP_476986.1	purity of essence, isoform A [Drosophila melanogaster]	CG14472	poe	3	7	7	3	0	7	1.01	1.371e-05	X	X	X	X	X	X	X	X	X	X	X	X	X	X	X	X	1	1	1	1	0	1	0.24	7.04e-06	X	X	X	X
698	1.3e-05	1	4.8e-05	1	0	0	1.79769e+308	6	NP_001163621.1;NP_001163622.1;NP_001247125.1;NP_001247126.1;NP_650492.2;NP_732069.3	NP_001163621.1	non-specific lethal 1, isoform D [Drosophila melanogaster]	CG4699	nsl1	2	2	2	2	0	2	1.61	1.345e-05	X	X	X	X	X	X	X	X	X	X	X	X	X	X	X	X	1	2	2	1	0	2	0.77	4.833e-05	X	X	X	X
699	1.3e-05	1	2.9e-05	1	0	0	1.79769e+308	1	NP_651288.1	NP_651288.1	polybromo [Drosophila melanogaster]	CG11375	polybromo	1	2	2	1	0	2	0.6	1.261e-05	1	1	1	1	0	1	1.33	2.881e-05	X	X	X	X	X	X	X	X	X	X	X	X	X	X	X	X	X	X	X	X
700	1.3e-05	1	1.8e-05	1	0	0	1.79769e+308	1	NP_725671.1	NP_725671.1	connector enhancer of ksr, isoform A [Drosophila melanogaster]	CG6556	cnk	1	2	2	1	0	2	0.71	1.339e-05	X	X	X	X	X	X	X	X	1	1	1	1	0	1	0.77	1.812e-05	X	X	X	X	X	X	X	X	X	X	X	X
701	1.1e-05	1	3.1e-05	1	0	0	1.79769e+308	1	NP_611242.1	NP_611242.1	eukaryotic translation initiation factor 3 subunit c, isoform A [Drosophila melanogaster]	CG4954	eIF3-S8	1	1	1	1	0	1	1.21	1.146e-05	X	X	X	X	X	X	X	X	1	1	1	1	0	1	1.21	3.1e-05	X	X	X	X	X	X	X	X	X	X	X	X
702	1e-05	1	0.000217	1	0	0	1.79769e+308	1	NP_995812.1	NP_995812.1	Cyp12d1-d [Drosophila melanogaster]	CG33503	Cyp12d1-d	1	1	0	0	1	0.5	2.11	1.001e-05	X	X	X	X	X	X	X	X	4	4	1	1	3	4	12.48	0.0002166	X	X	X	X	X	X	X	X	X	X	X	X
703	1e-05	1	9.1e-05	1	0	0	1.79769e+308	1	NP_610635.4	NP_610635.4	Cyp12d1-p, isoform A [Drosophila melanogaster]	CG30489	Cyp12d1-p	1	1	0	0	1	0.5	2.11	1.001e-05	1	1	1	1	0	1	2.69	9.146e-05	3	3	0	0	3	0	9.79	X	X	X	X	X	X	X	X	X	X	X	X	X
704	1e-05	1	1.8e-05	1	0	0	1.79769e+308	1	NP_608340.2	NP_608340.2	uncharacterized protein CG14215, isoform A [Drosophila melanogaster]	CG14215	CG14215	1	2	2	1	0	2	0.66	9.88e-06	X	X	X	X	X	X	X	X	X	X	X	X	X	X	X	X	1	1	1	1	0	1	1.33	1.774e-05	X	X	X	X
705	1e-05	1	1.3e-05	1	0	0	1.79769e+308	6	NP_001163532.1;NP_001246952.1;NP_001287201.1;NP_476956.3;NP_996159.1;NP_996160.1	NP_001163532.1	TBP-associated factor 1, isoform D [Drosophila melanogaster]	CG17603	Taf1	1	2	2	1	0	2	0.86	9.95e-06	X	X	X	X	X	X	X	X	1	1	1	1	0	1	0.76	1.346e-05	X	X	X	X	X	X	X	X	X	X	X	X
706	9e-06	1	6.9e-05	1	0	0	1.79769e+308	3	NP_001097723.1;NP_001262419.1;NP_788612.1	NP_001097723.1	uncharacterized protein CG8176, isoform C [Drosophila melanogaster]	CG8176	CG8176	1	1	1	1	0	1	1.56	8.55e-06	X	X	X	X	X	X	X	X	2	3	3	2	0	3	3.93	6.937e-05	X	X	X	X	X	X	X	X	X	X	X	X
707	9e-06	1	3.2e-05	1	0	0	1.79769e+308	1	NP_476706.1	NP_476706.1	RNA polymerase II 140kD subunit, isoform A [Drosophila melanogaster]	CG3180	RpII140	1	1	1	1	0	1	1.19	8.87e-06	X	X	X	X	X	X	X	X	X	X	X	X	X	X	X	X	1	1	1	1	0	1	1.11	3.185e-05	X	X	X	X
708	9e-06	1	3.1e-05	1	0	0	1.79769e+308	1	NP_523374.2	NP_523374.2	structural maintenance of chromosomes 3 [Drosophila melanogaster]	CG9802	SMC3	1	1	1	1	0	1	1	8.69e-06	X	X	X	X	X	X	X	X	X	X	X	X	X	X	X	X	1	1	1	1	0	1	1.08	3.121e-05	X	X	X	X
709	9e-06	1	2.6e-05	1	0	0	1.79769e+308	1	NP_572348.1	NP_572348.1	uncharacterized protein CG14438, isoform A [Drosophila melanogaster]	CG14438	CG14438	1	3	3	1	0	3	0.63	9.44e-06	X	X	X	X	X	X	X	X	2	3	3	2	0	3	1.42	2.555e-05	X	X	X	X	X	X	X	X	X	X	X	X
710	9e-06	1	2.5e-05	1	0	0	1.79769e+308	1	NP_788449.1	NP_788449.1	Ctr9, isoform B [Drosophila melanogaster]	CG2469	CG2469	1	1	1	1	0	1	1.3	9.07e-06	X	X	X	X	X	X	X	X	1	1	1	1	0	1	2.35	2.453e-05	X	X	X	X	X	X	X	X	X	X	X	X
711	9e-06	1	2.3e-05	1	0	0	1.79769e+308	1	NP_569729.1	NP_569729.1	synaptojanin, isoform B [Drosophila melanogaster]	CG6562	Synj	1	1	1	1	0	1	1.15	8.56e-06	X	X	X	X	X	X	X	X	1	1	1	1	0	1	1.48	2.316e-05	X	X	X	X	X	X	X	X	X	X	X	X
712	8e-06	1	4.5e-05	1	0	0	1.79769e+308	1	NP_649455.1	NP_649455.1	uncharacterized protein CG9776, isoform A [Drosophila melanogaster]	CG9776	CG9776	1	1	1	1	0	1	2.22	8.27e-06	X	X	X	X	X	X	X	X	1	2	2	1	0	2	1.98	4.478e-05	X	X	X	X	X	X	X	X	X	X	X	X
713	7e-06	1	3.4e-05	1	0	0	1.79769e+308	3	NP_001137839.1;NP_001260547.1;NP_609913.2	NP_001137839.1	uncharacterized protein CG10600, isoform B [Drosophila melanogaster]	CG10600	CG10600	1	1	1	1	0	1	0.85	7.42e-06	1	1	1	1	0	1	1.07	3.389e-05	X	X	X	X	X	X	X	X	X	X	X	X	X	X	X	X	X	X	X	X
714	6e-06	1	1.7e-05	1	0	0	1.79769e+308	5	NP_001097946.1;NP_001247326.1;NP_001263009.1;NP_001263010.1;NP_524886.2	NP_001097946.1	without children, isoform B [Drosophila melanogaster]	CG5965	woc	1	1	1	1	0	1	0.76	6.12e-06	X	X	X	X	X	X	X	X	1	1	1	1	0	1	1.23	1.657e-05	X	X	X	X	X	X	X	X	X	X	X	X
715	6e-06	1	1.7e-05	1	0	0	1.79769e+308	3	NP_001097475.2;NP_647642.2;NP_728652.1	NP_001097475.2	uncharacterized protein CG7971, isoform F [Drosophila melanogaster]	CG7971	CG7971	1	1	1	1	0	1	0.85	6.3e-06	X	X	X	X	X	X	X	X	1	1	1	1	0	1	0.73	1.705e-05	X	X	X	X	X	X	X	X	X	X	X	X
716	6e-06	1	1.6e-05	1	0	0	1.79769e+308	2	NP_001286540.1;NP_523778.2	NP_001286540.1	Dicer-2, isoform B [Drosophila melanogaster]	CG6493	Dcr-2	1	1	1	1	0	1	0.64	6.06e-06	X	X	X	X	X	X	X	X	1	1	1	1	0	1	1.05	1.639e-05	X	X	X	X	X	X	X	X	X	X	X	X
717	5e-06	1	4.7e-05	1	0	0	1.79769e+308	75	NP_001036476.1;NP_001036477.1;NP_001036478.1;NP_001036479.1;NP_001036480.1;NP_001036481.1;NP_001036482.1;NP_001036483.1;NP_001036484.1;NP_001036485.1;NP_001036486.1;NP_001036487.1;NP_001036488.1;NP_001036489.1;NP_001036490.1;NP_001036491.1;NP_001036492.1;NP_001036493.1;NP_001036494.1;NP_001036495.1;NP_001036497.1;NP_001036498.1;NP_001036499.1;NP_001036500.1;NP_001036501.1;NP_001036502.1;NP_001036…	NP_001036476.1	down syndrome cell adhesion molecule 1, isoform BH [Drosophila melanogaster]	CG17800	Dscam1	1	1	1	1	0	1	0.49	5.12e-06	1	2	2	1	0	2	0.64	4.683e-05	X	X	X	X	X	X	X	X	X	X	X	X	X	X	X	X	X	X	X	X
718	4e-06	1	3.5e-05	1	0	0	1.79769e+308	1	NP_730864.1	NP_730864.1	uncharacterized protein CG43427, isoform E [Drosophila melanogaster]	CG43427	CG43427	1	1	0	0	1	0.5	1.31	3.8e-06	1	1	1	1	0	1	2.19	3.473e-05	2	3	0	0	3	0	1.6	X	1	2	0	0	2	0	0.8	X	X	X	X	X
719	4e-06	1	1.2e-05	1	0	0	1.79769e+308	2	NP_525040.2;NP_726773.2	NP_525040.2	trithorax-related, isoform C [Drosophila melanogaster]	CG3848	trr	1	1	1	1	0	1	0.66	4.33e-06	X	X	X	X	X	X	X	X	1	1	1	1	0	1	0.71	1.171e-05	X	X	X	X	X	X	X	X	X	X	X	X
720	4e-06	1	1.2e-05	1	0	0	1.79769e+308	4	NP_001138174.1;NP_001245565.1;NP_001259310.1;NP_524764.1	NP_001138174.1	cut, isoform C [Drosophila melanogaster]	CG11387	ct	1	1	1	1	0	1	1.55	4.38e-06	X	X	X	X	X	X	X	X	1	1	1	1	0	1	0.92	1.184e-05	X	X	X	X	X	X	X	X	X	X	X	X
721	3e-06	1	1.7e-05	1	0	0	1.79769e+308	3	NP_001097661.2;NP_001262211.1;NP_524215.2	NP_001097661.2	tenascin major, isoform D [Drosophila melanogaster]	CG5723	Ten-m	1	1	1	1	0	1	0.73	3.16e-06	X	X	X	X	X	X	X	X	1	2	2	1	0	2	0.73	1.711e-05	X	X	X	X	X	X	X	X	X	X	X	X
722	3e-06	1	1.3e-05	1	0	0	1.79769e+308	7	NP_001036722.1;NP_001036723.1;NP_001036724.1;NP_001036726.1;NP_001036728.1;NP_001262730.1;NP_001262732.1	NP_001036722.1	dystrophin, isoform H [Drosophila melanogaster]	CG34157	Dys	1	1	1	1	0	1	0.53	2.9e-06	1	1	1	1	0	1	0.44	1.324e-05	X	X	X	X	X	X	X	X	X	X	X	X	X	X	X	X	X	X	X	X
723	0	0	0.001138	2	0	0	0	1	NP_609361.1	NP_609361.1	eukaryotic translation elongation factor 1 delta, isoform B [Drosophila melanogaster]	CG4912	eEF1delta	X	X	X	X	X	X	X	X	X	X	X	X	X	X	X	X	5	18	18	5	0	18	28.52	0.00198363	1	2	2	1	0	2	5.86	0.00029261	X	X	X	X
724	0	0	0.001093	2	0	0	0	1	NP_650048.1	NP_650048.1	translationally controlled tumor protein, isoform A [Drosophila melanogaster]	CG4800	Tctp	X	X	X	X	X	X	X	X	X	X	X	X	X	X	X	X	4	12	12	4	0	12	29.65	0.00196825	1	1	1	1	0	1	8.14	0.00021776	X	X	X	X
725	0	0	0.000798	2	0	0	0	1	NP_511095.1	NP_511095.1	histone H3.3B, isoform A [Drosophila melanogaster]	CG8989	His3.3B	1	1	0	0	1	0	5.15	X	1	1	1	1	0	1	23.53	0.00035038	1	6	6	1	0	6	23.53	0.00124463	X	X	X	X	X	X	X	X	X	X	X	X
726	0	0	0.00079	2	0	0	0	1	NP_477445.1	NP_477445.1	mesencephalic astrocyte-derived neurotrophic factor [Drosophila melanogaster]	CG7013	Manf	X	X	X	X	X	X	X	X	1	1	1	1	0	1	12.14	0.00027544	1	8	8	1	0	8	17.92	0.00130458	X	X	X	X	X	X	X	X	X	X	X	X
727	0	0	0.000579	2	0	0	0	4	NP_001259787.1;NP_722583.1;NP_722584.1;NP_722585.1	NP_001259787.1	lethal (2) giant larvae, isoform K [Drosophila melanogaster]	CG2671	l(2)gl	X	X	X	X	X	X	X	X	X	X	X	X	X	X	X	X	9	17	17	9	0	17	14.46	0.00043879	11	21	21	11	0	21	15.1	0.00071962	X	X	X	X
728	0	0	0.000565	2	0	0	0	1	NP_477176.1	NP_477176.1	cytochrome c proximal, isoform A [Drosophila melanogaster]	CG17903	Cyt-c-p	X	X	X	X	X	X	X	X	X	X	X	X	X	X	X	X	2	3	3	2	0	3	16.67	0.00078365	1	1	1	1	0	1	10.19	0.0003468	X	X	X	X
729	0	0	0.000429	2	0	0	0	2	NP_001284795.1;NP_569951.1	NP_001284795.1	phosphoglycerate mutase 5, isoform B [Drosophila melanogaster]	CG14816	Pgam5	X	X	X	X	X	X	X	X	2	4	4	2	0	4	12.15	0.00066182	1	2	2	1	0	2	5.56	0.00019591	X	X	X	X	X	X	X	X	X	X	X	X
730	0	0	0.000402	2	0	0	0	1	NP_477222.1	NP_477222.1	surfeit 4 [Drosophila melanogaster]	CG6202	Surf4	X	X	X	X	X	X	X	X	1	1	1	1	0	1	5.56	0.00017649	2	6	6	2	0	6	10.37	0.00062692	X	X	X	X	X	X	X	X	X	X	X	X
731	0	0	0.000386	2	0	0	0	1	NP_787998.1	NP_787998.1	A kinase anchor protein 200, isoform D [Drosophila melanogaster]	CG13388	Akap200	X	X	X	X	X	X	X	X	X	X	X	X	X	X	X	X	3	7	7	3	0	7	10.04	0.00023594	2	12	12	2	0	12	6.33	0.00053698	X	X	X	X
732	0	0	0.000378	2	0	0	0	1	NP_523943.1	NP_523943.1	regulator of chromosome condensation 1, isoform A [Drosophila melanogaster]	CG10480	Rcc1	X	X	X	X	X	X	X	X	X	X	X	X	X	X	X	X	5	12	12	5	0	12	13.71	0.0006189	2	2	2	2	0	2	3.84	0.00013694	X	X	X	X
733	0	0	0.000369	2	0	0	0	1	NP_524079.1	NP_524079.1	protein disulfide isomerase, isoform A [Drosophila melanogaster]	CG6988	Pdi	X	X	X	X	X	X	X	X	X	X	X	X	X	X	X	X	3	9	9	3	0	9	11.69	0.0005119	2	3	3	2	0	3	7.66	0.00022654	X	X	X	X
734	0	0	0.000363	2	0	0	0	1	NP_651717.1	NP_651717.1	uncharacterized protein CG7601 [Drosophila melanogaster]	CG7601	CG7601	X	X	X	X	X	X	X	X	1	2	2	1	0	2	6.44	0.00029234	1	5	5	1	0	5	6.44	0.00043269	X	X	X	X	X	X	X	X	X	X	X	X
735	0	0	0.000348	2	0	0	0	1	NP_651552.1	NP_651552.1	uncharacterized protein CG5934 [Drosophila melanogaster]	CG5934	CG5934	X	X	X	X	X	X	X	X	X	X	X	X	X	X	X	X	1	2	2	1	0	2	13.33	0.00041795	1	1	1	1	0	1	13.33	0.00027744	X	X	X	X
736	0	0	0.00034	2	0	0	0	1	NP_572503.1	NP_572503.1	lethal (1) G0020, isoform A [Drosophila melanogaster]	CG1994	l(1)G0020	X	X	X	X	X	X	X	X	X	X	X	X	X	X	X	X	11	19	19	11	0	19	14.98	0.00053177	2	4	4	2	0	4	3.57	0.00014863	X	X	X	X
737	0	0	0.000339	2	0	0	0	1	NP_651509.2	NP_651509.2	secreted protein, acidic, cysteine-rich, isoform A [Drosophila melanogaster]	CG6378	SPARC	X	X	X	X	X	X	X	X	X	X	X	X	X	X	X	X	2	2	2	2	0	2	9.87	0.0001856	3	4	4	3	0	4	19.74	0.00049282	X	X	X	X
738	0	0	0.00033	2	0	0	0	1	NP_524011.1	NP_524011.1	ATP synthase, subunit B [Drosophila melanogaster]	CG8189	ATPsynB	X	X	X	X	X	X	X	X	1	1	1	1	0	1	6.17	0.0001961	1	4	4	1	0	4	6.17	0.00046439	X	X	X	X	X	X	X	X	X	X	X	X
739	0	0	0.00032	2	0	0	0	2	NP_001036597.1;NP_648308.1	NP_001036597.1	uncharacterized protein CG3689, isoform C [Drosophila melanogaster]	CG3689	CG3689	X	X	X	X	X	X	X	X	1	2	2	1	0	2	3.8	0.00040212	1	2	2	1	0	2	3.8	0.00023807	X	X	X	X	X	X	X	X	X	X	X	X
740	0	0	0.000315	2	0	0	0	2	NP_524320.1;NP_731617.2	NP_524320.1	TBP-associated factor 12, isoform A [Drosophila melanogaster]	CG17358	Taf12	X	X	X	X	X	X	X	X	2	2	2	2	0	2	14.8	0.00048624	1	1	1	1	0	1	10.71	0.00014394	X	X	X	X	X	X	X	X	X	X	X	X
741	0	0	0.000314	2	0	0	0	2	NP_572319.2;NP_727091.1	NP_572319.2	knockdown, isoform A [Drosophila melanogaster]	CG3861	kdn	X	X	X	X	X	X	X	X	X	X	X	X	X	X	X	X	5	9	9	5	0	9	18.1	0.00054721	1	1	1	1	0	1	2.16	8.072e-05	X	X	X	X
742	0	0	0.000285	2	0	0	0	2	NP_001259493.1;NP_572826.1	NP_001259493.1	ade5, isoform B [Drosophila melanogaster]	CG3989	ade5	X	X	X	X	X	X	X	X	X	X	X	X	X	X	X	X	3	6	6	3	0	6	9.58	0.00039549	1	2	2	1	0	2	2.34	0.00017502	X	X	X	X
743	0	0	0.000279	2	0	0	0	1	NP_725084.2	NP_725084.2	ERp60 [Drosophila melanogaster]	CG8983	ERp60	X	X	X	X	X	X	X	X	X	X	X	X	X	X	X	X	4	7	7	4	0	7	11.45	0.00040385	1	2	2	1	0	2	4.91	0.00015319	X	X	X	X
744	0	0	0.000271	2	0	0	0	1	NP_524613.1	NP_524613.1	ferrochelatase, isoform A [Drosophila melanogaster]	CG2098	FeCH	X	X	X	X	X	X	X	X	1	2	2	1	0	2	3.91	0.00024818	2	4	4	2	0	4	11.98	0.00029387	X	X	X	X	X	X	X	X	X	X	X	X
745	0	0	0.000268	2	0	0	0	1	NP_724018.1	NP_724018.1	Aspartyl-tRNA synthetase, mitochondrial, isoform A [Drosophila melanogaster]	CG31739	CG31739	X	X	X	X	X	X	X	X	4	11	11	4	0	11	5.45	0.00048444	2	2	2	2	0	2	2.4	5.215e-05	X	X	X	X	X	X	X	X	X	X	X	X
746	0	0	0.000267	2	0	0	0	1	NP_570020.1	NP_570020.1	eukaryotic translation initiation factor 2B subunit beta [Drosophila melanogaster]	CG2677	eIF2B-beta	X	X	X	X	X	X	X	X	X	X	X	X	X	X	X	X	3	4	4	3	0	4	16.48	0.00032059	2	2	2	2	0	2	12.78	0.00021281	X	X	X	X
747	0	0	0.000261	2	0	0	0	1	NP_609037.1	NP_609037.1	coat protein (coatomer) epsilon [Drosophila melanogaster]	CG9543	epsilonCOP	X	X	X	X	X	X	X	X	X	X	X	X	X	X	X	X	1	3	3	1	0	3	6.54	0.00027658	1	2	2	1	0	2	3.59	0.0002448	X	X	X	X
748	0	0	0.000259	2	0	0	0	1	NP_610269.1	NP_610269.1	DEAH-box helicase 15, isoform A [Drosophila melanogaster]	CG11107	Dhx15	X	X	X	X	X	X	X	X	1	2	2	1	0	2	1.65	0.00013073	5	10	10	5	0	10	10.7	0.00038699	X	X	X	X	X	X	X	X	X	X	X	X
749	0	0	0.000253	2	0	0	0	1	NP_523444.1	NP_523444.1	signal peptide peptidase [Drosophila melanogaster]	CG11840	Spp	X	X	X	X	X	X	X	X	X	X	X	X	X	X	X	X	1	3	3	1	0	3	2.31	0.00021757	1	3	3	1	0	3	2.31	0.00028885	X	X	X	X
750	0	0	0.000241	2	0	0	0	1	NP_572686.1	NP_572686.1	regulatory particle triple-A ATPase 3, isoform A [Drosophila melanogaster]	CG16916	Rpt3	X	X	X	X	X	X	X	X	1	3	3	1	0	3	4.36	0.00034613	2	2	2	2	0	2	12.35	0.00013662	X	X	X	X	X	X	X	X	X	X	X	X
751	0	0	0.000241	2	0	0	0	1	NP_647809.3	NP_647809.3	uncharacterized protein CG14969 [Drosophila melanogaster]	CG14969	CG14969	X	X	X	X	X	X	X	X	1	2	2	1	0	2	4.76	0.00030255	1	2	2	1	0	2	5.4	0.00017912	X	X	X	X	X	X	X	X	X	X	X	X
752	0	0	0.000233	2	0	0	0	2	NP_573323.1;NP_728196.1	NP_573323.1	uncharacterized protein CG6891, isoform A [Drosophila melanogaster]	CG6891	CG6891	X	X	X	X	X	X	X	X	1	1	1	1	0	1	6.75	0.00029234	1	1	1	1	0	1	9.82	0.00017308	X	X	X	X	X	X	X	X	X	X	X	X
753	0	0	0.000218	2	0	0	0	1	NP_649489.1	NP_649489.1	eukaryotic translation initiation factor 3 subunit f1 [Drosophila melanogaster]	CG9769	CG9769	X	X	X	X	X	X	X	X	X	X	X	X	X	X	X	X	2	3	3	2	0	3	8.93	0.00030227	1	1	1	1	0	1	5.36	0.00013377	X	X	X	X
754	0	0	0.000218	2	0	0	0	2	NP_001162956.1;NP_609517.2	NP_001162956.1	uncharacterized protein CG14932, isoform B [Drosophila melanogaster]	CG14932	CG14932	X	X	X	X	X	X	X	X	X	X	X	X	X	X	X	X	1	2	2	1	0	2	4.65	0.00026243	1	1	1	1	0	1	4.19	0.00017421	X	X	X	X
755	0	0	0.000207	2	0	0	0	1	NP_610224.1	NP_610224.1	uncharacterized protein CG17266, isoform A [Drosophila melanogaster]	CG17266	CG17266	X	X	X	X	X	X	X	X	1	1	1	1	0	1	10.93	0.00026039	1	1	1	1	0	1	7.65	0.00015416	X	X	X	X	X	X	X	X	X	X	X	X
756	0	0	0.000201	2	0	0	0	2	NP_572775.1;NP_727588.2	NP_572775.1	regucalcin, isoform C [Drosophila melanogaster]	CG1803	regucalcin	X	X	X	X	X	X	X	X	X	X	X	X	X	X	X	X	3	3	3	3	0	3	19.14	0.00027932	1	1	1	1	0	1	7.26	0.00012361	X	X	X	X
757	0	0	0.000198	2	0	0	0	1	NP_524690.1	NP_524690.1	dynactin 2, p50 subunit [Drosophila melanogaster]	CG8269	DCTN2-p50	X	X	X	X	X	X	X	X	X	X	X	X	X	X	X	X	2	4	4	2	0	4	8.95	0.00029696	1	1	1	1	0	1	3.95	9.856e-05	X	X	X	X
758	0	0	0.000198	2	0	0	0	1	NP_524583.1	NP_524583.1	spindle A, isoform A [Drosophila melanogaster]	CG7948	spn-A	X	X	X	X	X	X	X	X	1	2	2	1	0	2	3.87	0.00028364	X	X	X	X	X	X	X	X	1	1	1	1	0	1	5.36	0.00011147	X	X	X	X
759	0	0	0.000193	2	0	0	0	1	NP_649089.2	NP_649089.2	canopy b [Drosophila melanogaster]	CG11577	CG11577	X	X	X	X	X	X	X	X	1	1	1	1	0	1	4.07	0.00021562	X	X	X	X	X	X	X	X	1	1	1	1	0	1	6.79	0.00016948	X	X	X	X
760	0	0	0.000186	2	0	0	0	1	NP_651058.1	NP_651058.1	uncharacterized protein CG5346 [Drosophila melanogaster]	CG5346	CG5346	X	X	X	X	X	X	X	X	X	X	X	X	X	X	X	X	3	4	4	3	0	4	20.1	0.00028002	1	1	1	1	0	1	8.19	9.294e-05	X	X	X	X
762	0	0	0.000176	2	0	0	0	4	NP_001097249.1;NP_001097250.1;NP_001286261.1;NP_477369.1	NP_001097249.1	TER94, isoform C [Drosophila melanogaster]	CG2331	TER94	X	X	X	X	X	X	X	X	X	X	X	X	X	X	X	X	4	9	9	4	0	9	6.05	0.00030739	1	1	1	1	0	1	1.57	4.534e-05	X	X	X	X
763	0	0	0.000173	2	0	0	0	1	NP_608582.2	NP_608582.2	uncharacterized protein CG4887, isoform A [Drosophila melanogaster]	CG4887	CG4887	X	X	X	X	X	X	X	X	X	X	X	X	X	X	X	X	4	11	11	4	0	11	9.56	0.00030909	1	1	1	1	0	1	1.99	3.731e-05	X	X	X	X
764	0	0	0.00017	2	0	0	0	1	NP_569961.2	NP_569961.2	eukaryotic translation initiation factor 2B subunit epsilon, isoform A [Drosophila melanogaster]	CG3806	eIF2B-epsilon	X	X	X	X	X	X	X	X	1	4	4	1	0	4	3.29	0.00028491	X	X	X	X	X	X	X	X	1	1	1	1	0	1	2.09	5.599e-05	X	X	X	X
765	0	0	0.000167	2	0	0	0	1	NP_649589.1	NP_649589.1	uncharacterized protein CG1218 [Drosophila melanogaster]	CG1218	CG1218	X	X	X	X	X	X	X	X	X	X	X	X	X	X	X	X	2	4	4	2	0	4	6.68	0.00025133	1	1	1	1	0	1	3.56	8.342e-05	X	X	X	X
766	0	0	0.000162	2	0	0	0	1	NP_609844.1	NP_609844.1	glucosidase 2 beta subunit, isoform A [Drosophila melanogaster]	CG6453	GCS2beta	X	X	X	X	X	X	X	X	X	X	X	X	X	X	X	X	1	1	1	1	0	1	2.74	5.148e-05	2	4	4	2	0	4	4.38	0.00027339	X	X	X	X
767	0	0	0.000157	2	0	0	0	1	NP_477479.1	NP_477479.1	uncharacterized protein CG6712 [Drosophila melanogaster]	CG6712	CG6712	X	X	X	X	X	X	X	X	1	2	2	1	0	2	3.3	0.00024188	1	1	1	1	0	1	3.81	7.16e-05	X	X	X	X	X	X	X	X	X	X	X	X
768	0	0	0.000153	2	0	0	0	1	NP_609792.1	NP_609792.1	calcium-binding protein 1, isoform A [Drosophila melanogaster]	CG5809	CaBP1	X	X	X	X	X	X	X	X	1	1	1	1	0	1	5.08	0.00011005	2	3	3	2	0	3	7.39	0.00019546	X	X	X	X	X	X	X	X	X	X	X	X
769	0	0	0.000153	2	0	0	0	1	NP_651660.1	NP_651660.1	uncharacterized protein CG11837 [Drosophila melanogaster]	CG11837	CG11837	X	X	X	X	X	X	X	X	X	X	X	X	X	X	X	X	1	2	2	1	0	2	7.84	0.00018439	1	1	1	1	0	1	5.88	0.0001224	X	X	X	X
770	0	0	0.000152	2	0	0	0	1	NP_523984.1	NP_523984.1	minichromosome maintenance 7 [Drosophila melanogaster]	CG4978	Mcm7	X	X	X	X	X	X	X	X	1	4	4	1	0	4	2.36	0.00026473	1	1	1	1	0	1	1.81	3.918e-05	X	X	X	X	X	X	X	X	X	X	X	X
771	0	0	0.000152	2	0	0	0	1	NP_523434.2	NP_523434.2	helicase, isoform A [Drosophila melanogaster]	CG1666	Hlc	X	X	X	X	X	X	X	X	2	2	2	2	0	2	6.07	0.00017018	X	X	X	X	X	X	X	X	2	2	2	2	0	2	5.18	0.00013377	X	X	X	X
772	0	0	0.000147	2	0	0	0	1	NP_652004.2	NP_652004.2	vacuolar H[+] ATPase 68 kDa subunit 2, isoform A [Drosophila melanogaster]	CG3762	Vha68-2	X	X	X	X	X	X	X	X	1	2	2	1	0	2	1.95	0.00015522	2	3	3	2	0	3	6.35	0.00013784	X	X	X	X	X	X	X	X	X	X	X	X
773	0	0	0.000147	2	0	0	0	1	NP_612021.1	NP_612021.1	tudor staphylococcal nuclease, isoform A [Drosophila melanogaster]	CG7008	Tudor-SN	X	X	X	X	X	X	X	X	X	X	X	X	X	X	X	X	4	7	7	4	0	7	9.83	0.00021326	1	2	2	1	0	2	1.94	8.089e-05	X	X	X	X
774	0	0	0.000142	2	0	0	0	1	NP_524463.2	NP_524463.2	eukaryotic translation initiation factor 3 subunit d1 [Drosophila melanogaster]	CG10161	eIF-3p66	X	X	X	X	X	X	X	X	X	X	X	X	X	X	X	X	1	3	3	1	0	3	3.39	0.00015113	2	2	2	2	0	2	5.71	0.00013377	X	X	X	X
775	0	0	0.000138	2	0	0	0	3	NP_001246932.1;NP_001246933.1;NP_730978.1	NP_001246932.1	secretory 23, isoform E [Drosophila melanogaster]	CG1250	Sec23	X	X	X	X	X	X	X	X	X	X	X	X	X	X	X	X	2	5	5	2	0	5	7.43	0.00018061	1	2	2	1	0	2	4.1	9.591e-05	X	X	X	X
776	0	0	0.000133	2	0	0	0	1	NP_608851.1	NP_608851.1	uncharacterized protein CG3251 [Drosophila melanogaster]	CG3251	CG3251	X	X	X	X	X	X	X	X	X	X	X	X	X	X	X	X	2	2	2	2	0	2	7.68	0.00011399	1	2	2	1	0	2	3.23	0.00015133	X	X	X	X
777	0	0	0.000129	2	0	0	0	1	NP_609961.2	NP_609961.2	uncharacterized protein CG17544, isoform A [Drosophila melanogaster]	CG17544	CG17544	X	X	X	X	X	X	X	X	X	X	X	X	X	X	X	X	3	5	5	3	0	5	9.52	0.00020355	1	1	1	1	0	1	3.32	5.405e-05	X	X	X	X
778	0	0	0.000122	2	0	0	0	1	NP_649814.1	NP_649814.1	uncharacterized protein CG8043 [Drosophila melanogaster]	CG8043	CG8043	X	X	X	X	X	X	X	X	1	1	1	1	0	1	5.46	0.00013693	X	X	X	X	X	X	X	X	1	1	1	1	0	1	5.75	0.00010763	X	X	X	X
779	0	0	0.00012	2	0	0	0	1	NP_573394.1	NP_573394.1	immune deficiency, isoform A [Drosophila melanogaster]	CG5576	imd	X	X	X	X	X	X	X	X	X	X	X	X	X	X	X	X	1	1	1	1	0	1	5.13	0.00010334	1	1	1	1	0	1	6.96	0.0001372	X	X	X	X
780	0	0	0.000111	2	0	0	0	1	NP_609446.1	NP_609446.1	nucleoporin 107kD [Drosophila melanogaster]	CG6743	Nup107	X	X	X	X	X	X	X	X	X	X	X	X	X	X	X	X	2	4	4	2	0	4	3.91	0.00013355	1	2	2	1	0	2	1.42	8.865e-05	X	X	X	X
781	0	0	0.000111	2	0	0	0	1	NP_647887.1	NP_647887.1	uncharacterized protein CG1316 [Drosophila melanogaster]	CG1316	CG1316	X	X	X	X	X	X	X	X	1	1	1	1	0	1	3.19	0.00010139	2	2	2	2	0	2	6.6	0.00012005	X	X	X	X	X	X	X	X	X	X	X	X
782	0	0	0.00011	2	0	0	0	1	NP_650064.1	NP_650064.1	uncharacterized protein CG5214 [Drosophila melanogaster]	CG5214	CG5214	X	X	X	X	X	X	X	X	X	X	X	X	X	X	X	X	1	1	1	1	0	1	1.92	6.028e-05	1	2	2	1	0	2	2.99	0.00016006	X	X	X	X
783	0	0	0.000109	2	0	0	0	1	NP_611535.1	NP_611535.1	uncharacterized protein CG9346 [Drosophila melanogaster]	CG9346	CG9346	X	X	X	X	X	X	X	X	1	2	2	1	0	2	1.25	9.958e-05	2	4	4	2	0	4	5.02	0.00011792	X	X	X	X	X	X	X	X	X	X	X	X
784	0	0	0.000108	2	0	0	0	4	NP_732964.1;NP_732965.1;NP_732967.1;NP_732968.1	NP_732964.1	twin, isoform C [Drosophila melanogaster]	CG31137	twin	X	X	X	X	X	X	X	X	X	X	X	X	X	X	X	X	1	3	3	1	0	3	3.17	0.00014927	1	1	1	1	0	1	2.65	6.606e-05	X	X	X	X
785	0	0	0.000105	2	0	0	0	1	NP_525001.2	NP_525001.2	integrin linked kinase, isoform A [Drosophila melanogaster]	CG10504	Ilk	X	X	X	X	X	X	X	X	X	X	X	X	X	X	X	X	1	2	2	1	0	2	3.13	0.00012594	1	1	1	1	0	1	4.69	8.36e-05	X	X	X	X
786	0	0	0.0001	2	0	0	0	1	NP_610176.1	NP_610176.1	CCR4-NOT transcription complex subunit 3, isoform A [Drosophila melanogaster]	CG8426	Not3	X	X	X	X	X	X	X	X	X	X	X	X	X	X	X	X	1	2	2	1	0	2	2.96	6.685e-05	2	3	3	2	0	3	7.11	0.00013313	X	X	X	X
787	0	0	9.9e-05	2	0	0	0	1	NP_649969.1	NP_649969.1	uncharacterized protein CG3909 [Drosophila melanogaster]	CG3909	CG3909	X	X	X	X	X	X	X	X	X	X	X	X	X	X	X	X	1	1	1	1	0	1	3.93	8.523e-05	1	1	1	1	0	1	6.04	0.00011315	X	X	X	X
788	0	0	9.9e-05	2	0	0	0	1	NP_609377.1	NP_609377.1	ubiquitin specific protease 14, isoform A [Drosophila melanogaster]	CG5384	Usp14	X	X	X	X	X	X	X	X	X	X	X	X	X	X	X	X	1	2	2	1	0	2	3.37	0.00011879	1	1	1	1	0	1	3.16	7.885e-05	X	X	X	X
789	0	0	9.7e-05	2	0	0	0	1	NP_608355.1	NP_608355.1	uncharacterized protein CG12702, isoform A [Drosophila melanogaster]	CG12702	CG12702	X	X	X	X	X	X	X	X	X	X	X	X	X	X	X	X	1	2	2	1	0	2	1.95	6.485e-05	2	3	3	2	0	3	3.68	0.00012915	X	X	X	X
790	0	0	9.6e-05	2	0	0	0	2	NP_001285119.1;NP_572711.2	NP_001285119.1	uncharacterized protein CG1737, isoform C [Drosophila melanogaster]	CG1737	CG1737	X	X	X	X	X	X	X	X	X	X	X	X	X	X	X	X	1	1	1	1	0	1	1.62	3.053e-05	3	4	4	3	0	4	5.41	0.00016214	X	X	X	X
791	0	0	9.6e-05	2	0	0	0	3	NP_651888.1;NP_733451.1;NP_733453.1	NP_651888.1	uncharacterized protein CG1910, isoform A [Drosophila melanogaster]	CG1910	CG1910	X	X	X	X	X	X	X	X	X	X	X	X	X	X	X	X	1	2	2	1	0	2	7.77	0.00011538	1	1	1	1	0	1	4.7	7.659e-05	X	X	X	X
792	0	0	8.9e-05	2	0	0	0	1	NP_652007.1	NP_652007.1	NOP2-Sun domain family, member 2 [Drosophila melanogaster]	CG6133	Nsun2	X	X	X	X	X	X	X	X	1	1	1	1	0	1	1.74	6.388e-05	2	3	3	2	0	3	5.9	0.00011345	X	X	X	X	X	X	X	X	X	X	X	X
793	0	0	8.5e-05	2	0	0	0	1	NP_477301.1	NP_477301.1	zinc finger protein 30C [Drosophila melanogaster]	CG3998	zf30C	X	X	X	X	X	X	X	X	1	1	1	1	0	1	3.6	6.133e-05	2	3	3	2	0	3	5.79	0.00010892	X	X	X	X	X	X	X	X	X	X	X	X
794	0	0	8.3e-05	2	0	0	0	1	NP_730797.2	NP_730797.2	uncharacterized protein CG1092, isoform C [Drosophila melanogaster]	CG1092	CG1092	X	X	X	X	X	X	X	X	X	X	X	X	X	X	X	X	1	1	1	1	0	1	4.06	7.16e-05	1	1	1	1	0	1	3.05	9.506e-05	X	X	X	X
795	0	0	8.3e-05	2	0	0	0	1	NP_523547.1	NP_523547.1	meiotic recombination 11 [Drosophila melanogaster]	CG16928	mre11	X	X	X	X	X	X	X	X	X	X	X	X	X	X	X	X	1	1	1	1	0	1	2.9	4.55e-05	2	2	2	2	0	2	4.52	0.00012082	X	X	X	X
796	0	0	8.3e-05	2	0	0	0	1	NP_610182.3	NP_610182.3	lethal (2) 09851, isoform A [Drosophila melanogaster]	CG12792	l(2)09851	X	X	X	X	X	X	X	X	1	1	1	1	0	1	4.39	0.0001045	1	1	1	1	0	1	6.58	6.187e-05	X	X	X	X	X	X	X	X	X	X	X	X
797	0	0	8.1e-05	2	0	0	0	1	NP_610117.1	NP_610117.1	cullin 2, isoform B [Drosophila melanogaster]	CG1512	Cul2	X	X	X	X	X	X	X	X	1	1	1	1	0	1	1.86	6.328e-05	X	X	X	X	X	X	X	X	1	2	2	1	0	2	3.19	9.948e-05	X	X	X	X
798	0	0	8e-05	2	0	0	0	1	NP_648537.2	NP_648537.2	Grip163 [Drosophila melanogaster]	CG5688	Grip163	X	X	X	X	X	X	X	X	1	1	1	1	0	1	1.33	3.527e-05	2	6	6	2	0	6	2.15	0.00012529	X	X	X	X	X	X	X	X	X	X	X	X
799	0	0	7.8e-05	2	0	0	0	1	NP_609043.1	NP_609043.1	uncharacterized protein CG31637, isoform A [Drosophila melanogaster]	CG31637	CG31637	X	X	X	X	X	X	X	X	1	1	1	1	0	1	3.7	9.805e-05	1	1	1	1	0	1	5.97	5.805e-05	X	X	X	X	X	X	X	X	X	X	X	X
800	0	0	7.8e-05	2	0	0	0	1	NP_524099.2	NP_524099.2	DNA-polymerase-delta [Drosophila melanogaster]	CG5949	DNApol-delta	X	X	X	X	X	X	X	X	1	3	3	1	0	3	1.47	0.00013091	1	1	1	1	0	1	2.75	2.583e-05	X	X	X	X	X	X	X	X	X	X	X	X
801	0	0	7.7e-05	2	0	0	0	1	NP_610995.1	NP_610995.1	structural maintenance of chromosomes 2 [Drosophila melanogaster]	CG10212	SMC2	X	X	X	X	X	X	X	X	1	3	3	1	0	3	1.95	0.00012125	X	X	X	X	X	X	X	X	1	1	1	1	0	1	2.46	3.177e-05	X	X	X	X
802	0	0	7.5e-05	2	0	0	0	1	NP_648348.1	NP_648348.1	SH3 and PX domain containing 1 [Drosophila melanogaster]	CG6757	SH3PX1	X	X	X	X	X	X	X	X	1	1	1	1	0	1	2.12	8.434e-05	X	X	X	X	X	X	X	X	1	1	1	1	0	1	3.72	6.629e-05	X	X	X	X
803	0	0	7.5e-05	2	0	0	0	1	NP_610973.3	NP_610973.3	uncharacterized protein CG12863 [Drosophila melanogaster]	CG12863	CG12863	X	X	X	X	X	X	X	X	X	X	X	X	X	X	X	X	1	1	1	1	0	1	5.95	6.456e-05	1	1	1	1	0	1	3.2	8.571e-05	X	X	X	X
804	0	0	7.5e-05	2	0	0	0	2	NP_611790.1;NP_726320.1	NP_611790.1	eukaryotic translation initiation factor 2B subunit delta, isoform A [Drosophila melanogaster]	CG10315	eIF2B-delta	X	X	X	X	X	X	X	X	X	X	X	X	X	X	X	X	2	2	2	2	0	2	4.63	9.013e-05	1	1	1	1	0	1	2.72	5.983e-05	X	X	X	X
805	0	0	7.5e-05	2	0	0	0	2	NP_001261470.1;NP_648033.2	NP_001261470.1	uncharacterized protein CG10289, isoform D [Drosophila melanogaster]	CG10289	CG10289	X	X	X	X	X	X	X	X	X	X	X	X	X	X	X	X	3	4	4	3	0	4	5.22	0.0001133	1	1	1	1	0	1	1.71	3.76e-05	X	X	X	X
806	0	0	7.5e-05	2	0	0	0	1	NP_611228.1	NP_611228.1	eukaryotic translation initiation factor 3 subunit b, isoform B [Drosophila melanogaster]	CG4878	eIF3-S9	X	X	X	X	X	X	X	X	X	X	X	X	X	X	X	X	1	1	1	1	0	1	3.48	4.089e-05	1	2	2	1	0	2	2.9	0.00010856	X	X	X	X
807	0	0	7.2e-05	2	0	0	0	1	NP_476922.1	NP_476922.1	gamma-Tubulin at 37C, isoform A [Drosophila melanogaster]	CG17566	gammaTub37C	X	X	X	X	X	X	X	X	X	X	X	X	X	X	X	X	1	1	1	1	0	1	3.72	6.173e-05	1	1	1	1	0	1	6.56	8.196e-05	X	X	X	X
808	0	0	7.2e-05	2	0	0	0	2	NP_524217.1;NP_788566.1	NP_524217.1	maelstrom, isoform A [Drosophila melanogaster]	CG11254	mael	X	X	X	X	X	X	X	X	X	X	X	X	X	X	X	X	1	1	1	1	0	1	8.71	6.146e-05	1	1	1	1	0	1	6.97	8.16e-05	X	X	X	X
809	0	0	7.2e-05	2	0	0	0	2	NP_524461.2;NP_732857.1	NP_524461.2	pointed, isoform B [Drosophila melanogaster]	CG17077	pnt	X	X	X	X	X	X	X	X	1	1	1	1	0	1	2.65	6.637e-05	2	2	2	2	0	2	5.71	7.858e-05	X	X	X	X	X	X	X	X	X	X	X	X
810	0	0	6.9e-05	2	0	0	0	4	NP_001245936.1;NP_001245937.1;NP_001260221.1;NP_609177.1	NP_001245936.1	connector of kinase to AP-1, isoform E [Drosophila melanogaster]	CG7392	Cka	X	X	X	X	X	X	X	X	X	X	X	X	X	X	X	X	1	1	1	1	0	1	1.74	3.767e-05	1	2	2	1	0	2	2.8	0.00010001	X	X	X	X
811	0	0	6.9e-05	2	0	0	0	1	NP_573384.1	NP_573384.1	N(alpha)-acetyltransferase 15/16, isoform A [Drosophila melanogaster]	CG12202	Nat1	X	X	X	X	X	X	X	X	X	X	X	X	X	X	X	X	2	3	3	2	0	3	2.92	9.51e-05	1	1	1	1	0	1	2.47	4.208e-05	X	X	X	X
812	0	0	6.5e-05	2	0	0	0	4	NP_001036676.1;NP_001097685.2;NP_649505.1;NP_730882.2	NP_001036676.1	Chondrocyte-derived ezrin-like domain containing protein, isoform E [Drosophila melanogaster]	CG44193	Cdep	X	X	X	X	X	X	X	X	1	2	2	1	0	2	1.63	8.166e-05	2	2	2	2	0	2	3.68	4.835e-05	X	X	X	X	X	X	X	X	X	X	X	X
813	0	0	6.5e-05	2	0	0	0	8	NP_001138086.1;NP_001189249.2;NP_001189250.2;NP_001189251.1;NP_650878.4;NP_732499.4;NP_732500.5;NP_732501.1	NP_001138086.1	uncharacterized protein CG42668, isoform E [Drosophila melanogaster]	CG42668	CG42668	X	X	X	X	X	X	X	X	1	2	2	1	0	2	1.78	9.958e-05	1	1	1	1	0	1	1.04	2.948e-05	X	X	X	X	X	X	X	X	X	X	X	X
814	0	0	6.2e-05	2	0	0	0	9	NP_001138166.1;NP_001138167.1;NP_001138168.1;NP_001138169.1;NP_001259291.1;NP_001259293.1;NP_001284966.1;NP_572350.2;NP_788867.1	NP_001138166.1	C3G guanyl-nucleotide exchange factor, isoform D [Drosophila melanogaster]	CG42328	C3G	X	X	X	X	X	X	X	X	X	X	X	X	X	X	X	X	2	3	3	2	0	3	1.79	6.586e-05	1	2	2	1	0	2	1.4	5.829e-05	X	X	X	X
815	0	0	6.2e-05	2	0	0	0	1	NP_610719.1	NP_610719.1	precocious dissociation of sisters 5, isoform A [Drosophila melanogaster]	CG17509	pds5	X	X	X	X	X	X	X	X	1	2	2	1	0	2	1.31	7.825e-05	1	2	2	1	0	2	0.99	4.632e-05	X	X	X	X	X	X	X	X	X	X	X	X
816	0	0	6.1e-05	2	0	0	0	14	NP_001188886.1;NP_001188887.1;NP_001188888.1;NP_001246215.1;NP_001286228.1;NP_523664.1;NP_724749.1;NP_724750.1;NP_724751.1;NP_724752.1;NP_724753.1;NP_724754.1;NP_724755.1;NP_724756.1	NP_001188886.1	suppressor of variegation 2-10, isoform J [Drosophila melanogaster]	CG8068	Su(var)2-10	X	X	X	X	X	X	X	X	X	X	X	X	X	X	X	X	1	1	1	1	0	1	3.54	5.254e-05	1	1	1	1	0	1	4.1	6.975e-05	X	X	X	X
817	0	0	6.1e-05	2	0	0	0	2	NP_649812.2;NP_731264.1	NP_649812.2	uncharacterized protein CG8036, isoform B [Drosophila melanogaster]	CG8036	CG8036	X	X	X	X	X	X	X	X	1	1	1	1	0	1	2.88	7.612e-05	1	1	1	1	0	1	1.92	4.507e-05	X	X	X	X	X	X	X	X	X	X	X	X
818	0	0	6e-05	2	0	0	0	1	NP_723117.1	NP_723117.1	uncharacterized protein CG9171, isoform E [Drosophila melanogaster]	CG9171	CG9171	X	X	X	X	X	X	X	X	X	X	X	X	X	X	X	X	1	1	1	1	0	1	4.41	5.186e-05	1	1	1	1	0	1	4.96	6.885e-05	X	X	X	X
819	0	0	5.7e-05	2	0	0	0	1	NP_523596.2	NP_523596.2	bicoid stability factor [Drosophila melanogaster]	CG10302	bsf	X	X	X	X	X	X	X	X	1	1	1	1	0	1	1.27	3.375e-05	2	4	4	2	0	4	2.76	7.992e-05	X	X	X	X	X	X	X	X	X	X	X	X
820	0	0	5.6e-05	2	0	0	0	2	NP_001246113.1;NP_476981.1	NP_001246113.1	diaphanous, isoform D [Drosophila melanogaster]	CG1768	dia	X	X	X	X	X	X	X	X	1	2	2	1	0	2	1.46	8.68e-05	1	1	1	1	0	1	2.09	2.569e-05	X	X	X	X	X	X	X	X	X	X	X	X
821	0	0	5.5e-05	2	0	0	0	1	NP_523467.1	NP_523467.1	male-specific lethal 2, isoform A [Drosophila melanogaster]	CG3241	msl-2	X	X	X	X	X	X	X	X	1	1	1	1	0	1	2.85	6.164e-05	X	X	X	X	X	X	X	X	1	1	1	1	0	1	2.33	4.845e-05	X	X	X	X
822	0	0	5.4e-05	2	0	0	0	1	NP_477185.1	NP_477185.1	disc proliferation abnormal, isoform A [Drosophila melanogaster]	CG1616	dpa	X	X	X	X	X	X	X	X	X	X	X	X	X	X	X	X	2	2	2	2	0	2	4.27	6.515e-05	1	1	1	1	0	1	1.73	4.325e-05	X	X	X	X
823	0	0	5.3e-05	2	0	0	0	1	NP_649836.1	NP_649836.1	uncharacterized protein CG9839, isoform A [Drosophila melanogaster]	CG9839	CG9839	X	X	X	X	X	X	X	X	X	X	X	X	X	X	X	X	1	1	1	1	0	1	3.7	4.536e-05	1	1	1	1	0	1	2.89	6.022e-05	X	X	X	X
824	0	0	5.3e-05	2	0	0	0	1	NP_610947.3	NP_610947.3	uncharacterized protein CG8547, isoform C [Drosophila melanogaster]	CG8547	CG8547	X	X	X	X	X	X	X	X	X	X	X	X	X	X	X	X	1	1	1	1	0	1	3.24	4.565e-05	1	1	1	1	0	1	4.37	6.061e-05	X	X	X	X
825	0	0	5e-05	2	0	0	0	1	NP_608450.1	NP_608450.1	uncharacterized protein CG1486, isoform A [Drosophila melanogaster]	CG1486	CG1486	X	X	X	X	X	X	X	X	1	1	1	1	0	1	2.35	5.593e-05	X	X	X	X	X	X	X	X	1	1	1	1	0	1	1.29	4.396e-05	X	X	X	X
826	0	0	4.9e-05	2	0	0	0	1	NP_572902.1	NP_572902.1	Ndc80 [Drosophila melanogaster]	CG9938	Ndc80	X	X	X	X	X	X	X	X	X	X	X	X	X	X	X	X	1	1	1	1	0	1	4	4.179e-05	1	1	1	1	0	1	1.93	5.549e-05	X	X	X	X
827	0	0	4.9e-05	2	0	0	0	4	NP_001284844.1;NP_477147.2;NP_477148.2;NP_726894.1	NP_001284844.1	yin, isoform D [Drosophila melanogaster]	CG44402	yin	X	X	X	X	X	X	X	X	1	1	1	1	0	1	2.44	6.109e-05	1	1	1	1	0	1	2.31	3.617e-05	X	X	X	X	X	X	X	X	X	X	X	X
828	0	0	4.4e-05	2	0	0	0	2	NP_609529.2;NP_723700.1	NP_609529.2	uncharacterized protein CG6686, isoform B [Drosophila melanogaster]	CG6686	CG6686	X	X	X	X	X	X	X	X	1	1	1	1	0	1	1.45	4.943e-05	X	X	X	X	X	X	X	X	1	1	1	1	0	1	2.39	3.885e-05	X	X	X	X
829	0	0	4.2e-05	2	0	0	0	1	NP_610429.2	NP_610429.2	fanconi anemia complementation group I [Drosophila melanogaster]	CG13745	FANCI	X	X	X	X	X	X	X	X	2	2	2	2	0	2	2.77	6.435e-05	1	1	1	1	0	1	1.42	1.905e-05	X	X	X	X	X	X	X	X	X	X	X	X
830	0	0	4e-05	2	0	0	0	10	NP_001097304.2;NP_001097305.1;NP_001097306.2;NP_001137666.1;NP_001286408.1;NP_001286409.1;NP_001303348.1;NP_725362.1;NP_725363.1;NP_725364.1	NP_001097304.2	combgap, isoform J [Drosophila melanogaster]	CG8367	cg	X	X	X	X	X	X	X	X	X	X	X	X	X	X	X	X	1	1	1	1	0	1	1.09	3.42e-05	1	1	1	1	0	1	1.82	4.54e-05	X	X	X	X
831	0	0	3.9e-05	2	0	0	0	1	NP_651605.1	NP_651605.1	uncharacterized protein CG4849 [Drosophila melanogaster]	CG4849	CG4849	X	X	X	X	X	X	X	X	1	1	1	1	0	1	1.64	4.887e-05	1	1	1	1	0	1	1.95	2.893e-05	X	X	X	X	X	X	X	X	X	X	X	X
832	0	0	3.9e-05	2	0	0	0	1	NP_610735.1	NP_610735.1	pre-mRNA processing factor 8 [Drosophila melanogaster]	CG8877	Prp8	X	X	X	X	X	X	X	X	1	1	1	1	0	1	0.79	1.989e-05	2	5	5	2	0	5	1.88	5.887e-05	X	X	X	X	X	X	X	X	X	X	X	X
833	0	0	3.3e-05	2	0	0	0	2	NP_001247267.1;NP_477144.1	NP_001247267.1	myoblast city, isoform B [Drosophila melanogaster]	CG10379	mbc	X	X	X	X	X	X	X	X	X	X	X	X	X	X	X	X	2	2	2	2	0	2	2.24	2.81e-05	2	2	2	2	0	2	2.44	3.731e-05	X	X	X	X
834	0	0	3.2e-05	2	0	0	0	1	NP_524488.3	NP_524488.3	abnormal spindle [Drosophila melanogaster]	CG6875	asp	X	X	X	X	X	X	X	X	1	2	2	1	0	2	0.97	4.877e-05	1	1	1	1	0	1	0.97	1.444e-05	X	X	X	X	X	X	X	X	X	X	X	X
835	0	0	3.1e-05	2	0	0	0	2	NP_001137778.2;NP_608748.1	NP_001137778.2	fatty acid synthase 1, isoform C [Drosophila melanogaster]	CG3523	FASN1	X	X	X	X	X	X	X	X	X	X	X	X	X	X	X	X	2	3	3	2	0	3	1.42	3.332e-05	2	2	2	2	0	2	1.65	2.949e-05	X	X	X	X
836	0	0	2.5e-05	2	0	0	0	1	NP_572704.1	NP_572704.1	uncharacterized protein CG1657 [Drosophila melanogaster]	CG1657	CG1657	X	X	X	X	X	X	X	X	1	1	1	1	0	1	0.82	2.783e-05	X	X	X	X	X	X	X	X	1	1	1	1	0	1	0.93	2.188e-05	X	X	X	X
837	0	0	2.2e-05	2	0	0	0	1	NP_651936.1	NP_651936.1	mediator complex subunit 26, isoform A [Drosophila melanogaster]	CG1793	MED26	X	X	X	X	X	X	X	X	X	X	X	X	X	X	X	X	1	1	1	1	0	1	1.82	1.902e-05	1	1	1	1	0	1	0.94	2.526e-05	X	X	X	X
838	0	0	1.6e-05	2	0	0	0	8	NP_001163455.2;NP_001246800.1;NP_001246801.1;NP_001246802.1;NP_001261967.1;NP_001261968.1;NP_001261969.1;NP_524119.2	NP_001163455.2	disabled, isoform F [Drosophila melanogaster]	CG9695	Dab	X	X	X	X	X	X	X	X	1	1	1	1	0	1	0.93	2.019e-05	1	1	1	1	0	1	1.06	1.195e-05	X	X	X	X	X	X	X	X	X	X	X	X
839	0	0	1.4e-05	2	0	0	0	7	NP_001036327.1;NP_001036328.1;NP_001097050.1;NP_001245844.1;NP_001259886.1;NP_001259887.1;NP_608630.2	NP_001036327.1	WD repeat domain 62, isoform C [Drosophila melanogaster]	CG7337	CG7337	X	X	X	X	X	X	X	X	X	X	X	X	X	X	X	X	1	1	1	1	0	1	1.19	1.202e-05	1	1	1	1	0	1	0.72	1.596e-05	X	X	X	X
840	0	0	1.4e-05	2	0	0	0	1	NP_609998.1	NP_609998.1	uncharacterized protein CG10631 [Drosophila melanogaster]	CG10631	CG10631	X	X	X	X	X	X	X	X	1	1	1	1	0	1	0.34	1.26e-05	1	2	2	1	0	2	0.34	1.492e-05	X	X	X	X	X	X	X	X	X	X	X	X
841	0	0	6e-06	2	0	0	0	2	NP_001188693.1;NP_001188695.1	NP_001188693.1	Muscle-specific protein 300 kDa, isoform E [Drosophila melanogaster]	CG42768	Msp300	X	X	X	X	X	X	X	X	1	2	2	1	0	2	0.17	9.92e-06	1	1	1	1	0	1	0.14	2.94e-06	X	X	X	X	X	X	X	X	X	X	X	X
842	0.000307	1	0	0	0	0	1.79769e+308	1	NP_608497.1	NP_608497.1	uncharacterized protein CG11454 [Drosophila melanogaster]	CG11454	CG11454	1	7	7	1	0	7	6.3	0.00030665	X	X	X	X	X	X	X	X	X	X	X	X	X	X	X	X	X	X	X	X	X	X	X	X	X	X	X	X
843	0.000215	1	0	0	0	0	1.79769e+308	1	NP_788717.1	NP_788717.1	uncharacterized protein CG33107 [Drosophila melanogaster]	CG33107	CG33107	1	6	6	1	0	6	7.9	0.00021497	X	X	X	X	X	X	X	X	X	X	X	X	X	X	X	X	X	X	X	X	X	X	X	X	X	X	X	X
844	0.000142	1	0	0	0	0	1.79769e+308	2	NP_001163143.1;NP_610879.1	NP_001163143.1	Myb-interacting protein 120, isoform B [Drosophila melanogaster]	CG6061	mip120	3	13	13	3	0	13	6.51	0.00014238	X	X	X	X	X	X	X	X	X	X	X	X	X	X	X	X	X	X	X	X	X	X	X	X	X	X	X	X
845	0.000142	1	0	0	0	0	1.79769e+308	1	NP_648417.1	NP_648417.1	uncharacterized protein CG6404, isoform B [Drosophila melanogaster]	CG6404	CG6404	2	6	6	2	0	6	5.9	0.00014185	X	X	X	X	X	X	X	X	X	X	X	X	X	X	X	X	X	X	X	X	X	X	X	X	X	X	X	X
846	0.000129	1	0	0	0	0	1.79769e+308	3	NP_001163684.1;NP_001262822.1;NP_524447.2	NP_001163684.1	held out wings, isoform E [Drosophila melanogaster]	CG10293	how	2	5	5	2	0	5	7.92	0.00012904	X	X	X	X	X	X	X	X	X	X	X	X	X	X	X	X	X	X	X	X	X	X	X	X	X	X	X	X
847	0.000108	1	0	0	0	0	1.79769e+308	2	NP_524239.2;NP_730966.1	NP_524239.2	regena, isoform B [Drosophila melanogaster]	CG2161	Rga	1	6	6	1	0	6	3.63	0.00010804	X	X	X	X	X	X	X	X	X	X	X	X	X	X	X	X	X	X	X	X	X	X	X	X	X	X	X	X
848	0.000108	1	0	0	0	0	1.79769e+308	1	NP_523674.1	NP_523674.1	Cdc2-related kinase [Drosophila melanogaster]	CG1362	Cdc2rk	2	4	4	2	0	4	9.82	0.00010776	X	X	X	X	X	X	X	X	X	X	X	X	X	X	X	X	X	X	X	X	X	X	X	X	X	X	X	X
849	0.000107	1	0	0	0	0	1.79769e+308	1	NP_477146.1	NP_477146.1	unplugged [Drosophila melanogaster]	CG1650	unpg	1	5	5	1	0	5	3.92	0.00010749	X	X	X	X	X	X	X	X	X	X	X	X	X	X	X	X	X	X	X	X	X	X	X	X	X	X	X	X
850	8.3e-05	1	0	0	0	0	1.79769e+308	1	NP_611463.1	NP_611463.1	Hormone-sensitive lipase, isoform B [Drosophila melanogaster]	CG11055	Hsl	1	7	7	1	0	7	1.59	8.284e-05	X	X	X	X	X	X	X	X	X	X	X	X	X	X	X	X	X	X	X	X	X	X	X	X	X	X	X	X
851	7.4e-05	1	0	0	0	0	1.79769e+308	1	NP_609495.1	NP_609495.1	uncharacterized protein CG4751 [Drosophila melanogaster]	CG4751	CG4751	2	10	10	2	0	10	3.33	7.384e-05	X	X	X	X	X	X	X	X	X	X	X	X	X	X	X	X	X	X	X	X	X	X	X	X	X	X	X	X
852	6.7e-05	1	0	0	0	0	1.79769e+308	1	NP_572424.1	NP_572424.1	maheshvara, isoform B [Drosophila melanogaster]	CG10777	CG10777	3	10	6	2	4	6.07362	4.87	6.701e-05	2	4	0	0	4	0	2.33	X	1	2	0	0	2	0	1.16	X	1	2	0	0	2	0	1.16	X	X	X	X	X
853	6.3e-05	1	0	0	0	0	1.79769e+308	1	NP_001104391.2	NP_001104391.2	unextended, isoform E [Drosophila melanogaster]	CG42595	uex	1	5	5	1	0	5	1.8	6.251e-05	X	X	X	X	X	X	X	X	X	X	X	X	X	X	X	X	X	X	X	X	X	X	X	X	X	X	X	X
854	5.7e-05	1	0	0	0	0	1.79769e+308	1	NP_649158.1	NP_649158.1	regulatory particle non-ATPase 1 [Drosophila melanogaster]	CG7762	Rpn1	1	5	5	1	0	5	1.63	5.673e-05	X	X	X	X	X	X	X	X	X	X	X	X	X	X	X	X	X	X	X	X	X	X	X	X	X	X	X	X
855	5.6e-05	1	0	0	0	0	1.79769e+308	2	NP_001286792.1;NP_611847.2	NP_001286792.1	lost PHDs of trr, isoform B [Drosophila melanogaster]	CG5591	Lpt	1	8	8	1	0	8	1.42	5.643e-05	X	X	X	X	X	X	X	X	X	X	X	X	X	X	X	X	X	X	X	X	X	X	X	X	X	X	X	X
856	4.8e-05	1	0	0	0	0	1.79769e+308	2	NP_647793.1;NP_728843.1	NP_647793.1	uncharacterized protein CG11505, isoform B [Drosophila melanogaster]	CG11505	CG11505	2	7	7	2	0	7	2.81	4.767e-05	X	X	X	X	X	X	X	X	X	X	X	X	X	X	X	X	X	X	X	X	X	X	X	X	X	X	X	X
857	4.8e-05	1	0	0	0	0	1.79769e+308	1	NP_611873.1	NP_611873.1	MAN1, isoform B [Drosophila melanogaster]	CG3167	MAN1	2	3	3	2	0	3	4.77	4.812e-05	X	X	X	X	X	X	X	X	X	X	X	X	X	X	X	X	X	X	X	X	X	X	X	X	X	X	X	X
858	4.4e-05	1	0	0	0	0	1.79769e+308	1	NP_572767.1	NP_572767.1	Upf1, isoform A [Drosophila melanogaster]	CG1559	Upf1	2	5	5	2	0	5	3.05	4.418e-05	X	X	X	X	X	X	X	X	X	X	X	X	X	X	X	X	X	X	X	X	X	X	X	X	X	X	X	X
859	4.3e-05	1	0	0	0	0	1.79769e+308	1	NP_609711.1	NP_609711.1	lethal (2) 34Fd [Drosophila melanogaster]	CG7516	l(2)34Fd	2	3	3	2	0	3	3.05	4.338e-05	X	X	X	X	X	X	X	X	X	X	X	X	X	X	X	X	X	X	X	X	X	X	X	X	X	X	X	X
860	4e-05	1	0	0	0	0	1.79769e+308	4	NP_001245606.1;NP_001245607.1;NP_001245608.1;NP_727393.1	NP_001245606.1	ZAP3, isoform D [Drosophila melanogaster]	CG32685	ZAP3	1	5	5	1	0	5	1.47	4.032e-05	X	X	X	X	X	X	X	X	X	X	X	X	X	X	X	X	X	X	X	X	X	X	X	X	X	X	X	X
861	3.7e-05	1	0	0	0	0	1.79769e+308	1	NP_477268.2	NP_477268.2	stromalin [Drosophila melanogaster]	CG3423	SA	2	4	4	2	0	4	2.75	3.701e-05	X	X	X	X	X	X	X	X	X	X	X	X	X	X	X	X	X	X	X	X	X	X	X	X	X	X	X	X
862	3e-05	1	0	0	0	0	1.79769e+308	1	NP_651923.2	NP_651923.2	bip2 [Drosophila melanogaster]	CG2009	bip2	3	4	4	3	0	4	3.77	2.966e-05	X	X	X	X	X	X	X	X	X	X	X	X	X	X	X	X	X	X	X	X	X	X	X	X	X	X	X	X
863	2.9e-05	1	0	0	0	0	1.79769e+308	2	NP_001285305.1;NP_573086.2	NP_001285305.1	tay bridge, isoform D [Drosophila melanogaster]	CG9056	tay	2	7	7	2	0	7	1.33	2.937e-05	X	X	X	X	X	X	X	X	X	X	X	X	X	X	X	X	X	X	X	X	X	X	X	X	X	X	X	X
864	2e-05	1	0	0	0	0	1.79769e+308	1	NP_611592.2	NP_611592.2	mahjong, isoform A [Drosophila melanogaster]	CG10080	mahj	2	3	3	2	0	3	1.49	2.026e-05	X	X	X	X	X	X	X	X	X	X	X	X	X	X	X	X	X	X	X	X	X	X	X	X	X	X	X	X
865	1.9e-05	1	0	0	0	0	1.79769e+308	1	NP_610216.1	NP_610216.1	brahma associated protein 170kD [Drosophila melanogaster]	CG3274	Bap170	2	3	3	2	0	3	1.3	1.853e-05	X	X	X	X	X	X	X	X	X	X	X	X	X	X	X	X	X	X	X	X	X	X	X	X	X	X	X	X
866	1.3e-05	1	0	0	0	0	1.79769e+308	1	NP_573330.3	NP_573330.3	hat-trick, isoform D [Drosophila melanogaster]	CG34422	CG34422	2	3	3	2	0	3	1.09	1.258e-05	X	X	X	X	X	X	X	X	X	X	X	X	X	X	X	X	X	X	X	X	X	X	X	X	X	X	X	X
867	1e-05	1	0	0	0	0	1.79769e+308	3	NP_001097270.1;NP_001260899.1;NP_523701.3	NP_001097270.1	toutatis, isoform E [Drosophila melanogaster]	CG10897	tou	2	3	3	2	0	3	1.21	9.99e-06	X	X	X	X	X	X	X	X	X	X	X	X	X	X	X	X	X	X	X	X	X	X	X	X	X	X	X	X
868	0	0	0.002553	1	0	0	0	1	NP_572737.1	NP_572737.1	replication protein A3, isoform A [Drosophila melanogaster]	CG15220	RPA3	X	X	X	X	X	X	X	X	1	6	6	1	0	6	25	0.00255274	X	X	X	X	X	X	X	X	X	X	X	X	X	X	X	X	X	X	X	X
869	0	0	0.00186	1	0	0	0	1	NP_648022.1	NP_648022.1	uncharacterized protein CG6610, isoform A [Drosophila melanogaster]	CG6610	CG6610	X	X	X	X	X	X	X	X	X	X	X	X	X	X	X	X	1	6	6	1	0	6	36.26	0.0018601	X	X	X	X	X	X	X	X	X	X	X	X
870	0	0	0.001836	1	0	0	0	1	NP_476853.1	NP_476853.1	bicaudal, isoform A [Drosophila melanogaster]	CG3644	bic	X	X	X	X	X	X	X	X	X	X	X	X	X	X	X	X	5	11	11	5	0	11	46.15	0.00183626	X	X	X	X	X	X	X	X	X	X	X	X
871	0	0	0.001763	1	0	0	0	1	NP_652500.1	NP_652500.1	uncharacterized protein CG13364 [Drosophila melanogaster]	CG13364	CG13364	X	X	X	X	X	X	X	X	X	X	X	X	X	X	X	X	2	4	4	2	0	4	17.19	0.00176322	X	X	X	X	X	X	X	X	X	X	X	X
872	0	0	0.001237	1	0	0	0	1	YP_009047268.1	YP_009047268.1	cytochrome c oxidase subunit II (mitochondrion) [Drosophila melanogaster]		COX2	X	X	X	X	X	X	X	X	X	X	X	X	X	X	X	X	1	10	10	1	0	10	8.77	0.00123735	X	X	X	X	X	X	X	X	X	X	X	X
873	0	0	0.001144	1	0	0	0	1	NP_611693.1	NP_611693.1	ribosomal protein S24 [Drosophila melanogaster]	CG3751	RpS24	X	X	X	X	X	X	X	X	X	X	X	X	X	X	X	X	X	X	X	X	X	X	X	X	2	4	4	2	0	4	20.61	0.00114364	X	X	X	X
874	0	0	0.000879	1	0	0	0	1	NP_572420.1	NP_572420.1	spidey [Drosophila melanogaster]	CG1444	CG1444	X	X	X	X	X	X	X	X	X	X	X	X	X	X	X	X	4	10	10	4	0	10	26.79	0.00087886	X	X	X	X	X	X	X	X	X	X	X	X
875	0	0	0.00078	1	0	0	0	1	NP_477216.1	NP_477216.1	nascent polypeptide associated complex protein alpha subunit, isoform B [Drosophila melanogaster]	CG8759	Nacalpha	X	X	X	X	X	X	X	X	X	X	X	X	X	X	X	X	3	6	6	3	0	6	19.82	0.00078004	X	X	X	X	X	X	X	X	X	X	X	X
876	0	0	0.000613	1	0	0	0	1	NP_536733.1	NP_536733.1	upstream of RpIII128 [Drosophila melanogaster]	CG8340	128up	X	X	X	X	X	X	X	X	X	X	X	X	X	X	X	X	5	8	8	5	0	8	18.21	0.00061329	X	X	X	X	X	X	X	X	X	X	X	X
877	0	0	0.000609	1	0	0	0	1	NP_729866.1	NP_729866.1	ribosomal protein S12 [Drosophila melanogaster]	CG11271	RpS12	X	X	X	X	X	X	X	X	X	X	X	X	X	X	X	X	2	3	3	2	0	3	22.3	0.00060888	X	X	X	X	X	X	X	X	X	X	X	X
878	0	0	0.000595	1	0	0	0	1	NP_610547.1	NP_610547.1	seele [Drosophila melanogaster]	CG12918	sel	X	X	X	X	X	X	X	X	X	X	X	X	X	X	X	X	X	X	X	X	X	X	X	X	3	3	3	3	0	3	23.28	0.00059451	X	X	X	X
879	0	0	0.000583	1	0	0	0	1	NP_610932.1	NP_610932.1	eukaryotic translation initiation factor 3 subunit m, isoform A [Drosophila melanogaster]	CG8309	Tango7	X	X	X	X	X	X	X	X	X	X	X	X	X	X	X	X	3	8	8	3	0	8	16.28	0.00058318	X	X	X	X	X	X	X	X	X	X	X	X
880	0	0	0.000567	1	0	0	0	1	NP_725374.1	NP_725374.1	Selenide,water dikinase, isoform A [Drosophila melanogaster]	CG8553	SelD	X	X	X	X	X	X	X	X	X	X	X	X	X	X	X	X	3	8	8	3	0	8	13.32	0.00056707	X	X	X	X	X	X	X	X	X	X	X	X
881	0	0	0.000554	1	0	0	0	1	NP_648094.1	NP_648094.1	mediator complex subunit 4 [Drosophila melanogaster]	CG8609	MED4	X	X	X	X	X	X	X	X	2	3	3	2	0	3	11.24	0.00055408	X	X	X	X	X	X	X	X	X	X	X	X	X	X	X	X	X	X	X	X
882	0	0	0.00055	1	0	0	0	1	NP_611695.1	NP_611695.1	uncharacterized protein CG2852, isoform A [Drosophila melanogaster]	CG2852	CG2852	X	X	X	X	X	X	X	X	X	X	X	X	X	X	X	X	3	4	4	3	0	4	23.41	0.00055047	X	X	X	X	X	X	X	X	X	X	X	X
883	0	0	0.000532	1	0	0	0	1	NP_648427.1	NP_648427.1	biogenesis of lysosome-related organelles complex 1, subunit 2 [Drosophila melanogaster]	CG14145	Blos2	X	X	X	X	X	X	X	X	X	X	X	X	X	X	X	X	2	3	3	2	0	3	23.9	0.00053229	X	X	X	X	X	X	X	X	X	X	X	X
884	0	0	0.000511	1	0	0	0	5	NP_001247360.1;NP_001247361.1;NP_001263081.1;NP_651719.1;NP_733301.1	NP_001247360.1	uncharacterized protein CG1969, isoform E [Drosophila melanogaster]	CG1969	CG1969	X	X	X	X	X	X	X	X	X	X	X	X	X	X	X	X	2	4	4	2	0	4	15.38	0.00051062	X	X	X	X	X	X	X	X	X	X	X	X
885	0	0	0.000472	1	0	0	0	1	NP_573109.1	NP_573109.1	peroxisomal multifunctional enzyme type 2, isoform A [Drosophila melanogaster]	CG3415	Mfe2	X	X	X	X	X	X	X	X	X	X	X	X	X	X	X	X	6	10	10	6	0	10	17.89	0.00047177	X	X	X	X	X	X	X	X	X	X	X	X
886	0	0	0.000445	1	0	0	0	1	NP_477306.3	NP_477306.3	quaking related 58E-3, isoform B [Drosophila melanogaster]	CG3584	qkr58E-3	X	X	X	X	X	X	X	X	X	X	X	X	X	X	X	X	2	5	5	2	0	5	9.15	0.00044498	X	X	X	X	X	X	X	X	X	X	X	X
887	0	0	0.000441	1	0	0	0	1	NP_572178.1	NP_572178.1	torsin, isoform A [Drosophila melanogaster]	CG3024	Torsin	X	X	X	X	X	X	X	X	X	X	X	X	X	X	X	X	X	X	X	X	X	X	X	X	2	4	4	2	0	4	16.47	0.00044064	X	X	X	X
888	0	0	0.000439	1	0	0	0	2	NP_524415.1;NP_732527.1	NP_524415.1	mitochondrial transcription factor A, isoform A [Drosophila melanogaster]	CG4217	TFAM	X	X	X	X	X	X	X	X	X	X	X	X	X	X	X	X	2	4	4	2	0	4	10.12	0.00043909	X	X	X	X	X	X	X	X	X	X	X	X
889	0	0	0.000434	1	0	0	0	1	NP_572928.1	NP_572928.1	chloride intracellular channel, isoform A [Drosophila melanogaster]	CG10997	Clic	X	X	X	X	X	X	X	X	X	X	X	X	X	X	X	X	3	4	4	3	0	4	16.15	0.00043402	X	X	X	X	X	X	X	X	X	X	X	X
890	0	0	0.000425	1	0	0	0	1	NP_523528.1	NP_523528.1	yippee interacting protein 2 [Drosophila melanogaster]	CG4600	yip2	X	X	X	X	X	X	X	X	X	X	X	X	X	X	X	X	4	6	6	4	0	6	16.33	0.0004253	X	X	X	X	X	X	X	X	X	X	X	X
891	0	0	0.000424	1	0	0	0	1	NP_651968.1	NP_651968.1	RNA and export factor binding protein 1 [Drosophila melanogaster]	CG1101	Ref1	X	X	X	X	X	X	X	X	X	X	X	X	X	X	X	X	2	4	4	2	0	4	21.05	0.00042423	X	X	X	X	X	X	X	X	X	X	X	X
892	0	0	0.000421	1	0	0	0	1	NP_610931.1	NP_610931.1	O-fucosyltransferase 1, isoform A [Drosophila melanogaster]	CG12366	O-fut1	X	X	X	X	X	X	X	X	X	X	X	X	X	X	X	X	2	6	6	2	0	6	8.46	0.00042107	X	X	X	X	X	X	X	X	X	X	X	X
893	0	0	0.000407	1	0	0	0	1	NP_523997.1	NP_523997.1	heat shock protein 26, isoform A [Drosophila melanogaster]	CG4183	Hsp26	X	X	X	X	X	X	X	X	X	X	X	X	X	X	X	X	2	3	3	2	0	3	16.83	0.0004069	X	X	X	X	X	X	X	X	X	X	X	X
894	0	0	0.000386	1	0	0	0	1	NP_477355.1	NP_477355.1	E2F transcription factor 2, isoform A [Drosophila melanogaster]	CG1071	E2f2	X	X	X	X	X	X	X	X	2	3	3	2	0	3	11.35	0.00038636	X	X	X	X	X	X	X	X	X	X	X	X	X	X	X	X	X	X	X	X
895	0	0	0.000374	1	0	0	0	6	NP_001036581.1;NP_001036582.1;NP_001036583.1;NP_001261373.1;NP_523904.1;NP_728889.1	NP_001036581.1	Ecdysone-induced protein 63E, isoform F [Drosophila melanogaster]	CG10579	Eip63E	X	X	X	X	X	X	X	X	2	4	4	2	0	4	4.91	0.00037447	X	X	X	X	X	X	X	X	X	X	X	X	X	X	X	X	X	X	X	X
896	0	0	0.000366	1	0	0	0	2	NP_650453.3;NP_732020.2	NP_650453.3	uncharacterized protein CG5044, isoform A [Drosophila melanogaster]	CG5044	CG5044	X	X	X	X	X	X	X	X	X	X	X	X	X	X	X	X	3	5	5	3	0	5	17.4	0.00036638	X	X	X	X	X	X	X	X	X	X	X	X
897	0	0	0.000362	1	0	0	0	1	NP_477014.1	NP_477014.1	La autoantigen-like [Drosophila melanogaster]	CG10922	La	X	X	X	X	X	X	X	X	X	X	X	X	X	X	X	X	3	5	5	3	0	5	9.74	0.00036169	X	X	X	X	X	X	X	X	X	X	X	X
898	0	0	0.000361	1	0	0	0	1	NP_647984.1	NP_647984.1	uncharacterized protein CG10576, isoform A [Drosophila melanogaster]	CG10576	CG10576	X	X	X	X	X	X	X	X	X	X	X	X	X	X	X	X	3	5	5	3	0	5	10.23	0.00036076	X	X	X	X	X	X	X	X	X	X	X	X
899	0	0	0.000356	1	0	0	0	1	NP_647946.1	NP_647946.1	uncharacterized protein CG10672 [Drosophila melanogaster]	CG10672	CG10672	X	X	X	X	X	X	X	X	X	X	X	X	X	X	X	X	2	4	4	2	0	4	6.31	0.00035598	X	X	X	X	X	X	X	X	X	X	X	X
900	0	0	0.000353	1	0	0	0	1	NP_523836.2	NP_523836.2	adenylate kinase 2 [Drosophila melanogaster]	CG3140	Adk2	X	X	X	X	X	X	X	X	X	X	X	X	X	X	X	X	2	3	3	2	0	3	11.25	0.00035264	X	X	X	X	X	X	X	X	X	X	X	X
901	0	0	0.000347	1	0	0	0	1	NP_730211.1	NP_730211.1	uncharacterized protein CG32170 [Drosophila melanogaster]	CG32170	CG32170	X	X	X	X	X	X	X	X	X	X	X	X	X	X	X	X	X	X	X	X	X	X	X	X	3	5	5	3	0	5	8.89	0.0003468	X	X	X	X
902	0	0	0.000336	1	0	0	0	1	NP_650696.1	NP_650696.1	malate dehydrogenase 2 [Drosophila melanogaster]	CG7998	Mdh2	X	X	X	X	X	X	X	X	X	X	X	X	X	X	X	X	2	4	4	2	0	4	7.74	0.00033585	X	X	X	X	X	X	X	X	X	X	X	X
903	0	0	0.000335	1	0	0	0	3	NP_001245708.1;NP_001245709.1;NP_476891.1	NP_001245708.1	U2 small nuclear riboprotein auxiliary factor 50, isoform B [Drosophila melanogaster]	CG9998	U2af50	X	X	X	X	X	X	X	X	2	3	3	2	0	3	7.96	0.00033479	X	X	X	X	X	X	X	X	X	X	X	X	X	X	X	X	X	X	X	X
904	0	0	0.000323	1	0	0	0	2	NP_650645.1;NP_732256.1	NP_650645.1	aluminum tubes, isoform G [Drosophila melanogaster]	CG18212	alt	X	X	X	X	X	X	X	X	X	X	X	X	X	X	X	X	3	10	10	3	0	10	6.52	0.00032279	X	X	X	X	X	X	X	X	X	X	X	X
905	0	0	0.000323	1	0	0	0	3	NP_001262104.1;NP_001262105.1;NP_649210.1	NP_001262104.1	eukaryotic translation release factor 1, isoform H [Drosophila melanogaster]	CG5605	eRF1	X	X	X	X	X	X	X	X	X	X	X	X	X	X	X	X	3	5	5	3	0	5	15.79	0.00032279	X	X	X	X	X	X	X	X	X	X	X	X
906	0	0	0.000304	1	0	0	0	1	NP_611967.1	NP_611967.1	Tyrosyl-tRNA synthetase, mitochondrial [Drosophila melanogaster]	CG16912	Aats-tyr-m	X	X	X	X	X	X	X	X	X	X	X	X	X	X	X	X	3	5	5	3	0	5	9.27	0.000304	X	X	X	X	X	X	X	X	X	X	X	X
907	0	0	0.000298	1	0	0	0	1	NP_649950.1	NP_649950.1	uncharacterized protein CG8507 [Drosophila melanogaster]	CG8507	CG8507	X	X	X	X	X	X	X	X	X	X	X	X	X	X	X	X	2	4	4	2	0	4	6.33	0.00029775	X	X	X	X	X	X	X	X	X	X	X	X
908	0	0	0.000295	1	0	0	0	1	NP_610543.1	NP_610543.1	uncharacterized protein CG12128, isoform A [Drosophila melanogaster]	CG12128	CG12128	X	X	X	X	X	X	X	X	2	3	3	2	0	3	6.19	0.00029475	X	X	X	X	X	X	X	X	X	X	X	X	X	X	X	X	X	X	X	X
909	0	0	0.00029	1	0	0	0	1	NP_608985.1	NP_608985.1	uncharacterized protein CG9135, isoform A [Drosophila melanogaster]	CG9135	CG9135	X	X	X	X	X	X	X	X	X	X	X	X	X	X	X	X	3	5	5	3	0	5	10.68	0.00028965	X	X	X	X	X	X	X	X	X	X	X	X
910	0	0	0.000283	1	0	0	0	1	NP_649788.2	NP_649788.2	uncharacterized protein CG7483 [Drosophila melanogaster]	CG7483	eIF4AIII	X	X	X	X	X	X	X	X	X	X	X	X	X	X	X	X	3	4	4	3	0	4	10.53	0.00028282	X	X	X	X	X	X	X	X	X	X	X	X
911	0	0	0.000283	1	0	0	0	1	NP_649127.1	NP_649127.1	uncharacterized protein CG9300 [Drosophila melanogaster]	CG9300	CG9300	X	X	X	X	X	X	X	X	2	4	4	2	0	4	4.9	0.00028322	X	X	X	X	X	X	X	X	X	X	X	X	X	X	X	X	X	X	X	X
912	0	0	0.00028	1	0	0	0	4	NP_001163558.1;NP_001189198.2;NP_001303475.1;NP_649846.2	NP_001163558.1	skpA associated protein, isoform C [Drosophila melanogaster]	CG11963	skap	X	X	X	X	X	X	X	X	X	X	X	X	X	X	X	X	3	5	5	3	0	5	7.55	0.00028043	X	X	X	X	X	X	X	X	X	X	X	X
913	0	0	0.000266	1	0	0	0	2	NP_001162642.1;NP_652012.1	NP_001162642.1	coat protein (coatomer) delta, isoform B [Drosophila melanogaster]	CG14813	deltaCOP	X	X	X	X	X	X	X	X	X	X	X	X	X	X	X	X	3	5	5	3	0	5	8.29	0.00026565	X	X	X	X	X	X	X	X	X	X	X	X
914	0	0	0.00025	1	0	0	0	1	NP_788023.1	NP_788023.1	uncharacterized protein CG33129, isoform E [Drosophila melanogaster]	CG33129	CG33129	X	X	X	X	X	X	X	X	X	X	X	X	X	X	X	X	3	6	6	3	0	6	7.09	0.00025003	X	X	X	X	X	X	X	X	X	X	X	X
915	0	0	0.000249	1	0	0	0	1	NP_612010.1	NP_612010.1	uncharacterized protein CG7028, isoform A [Drosophila melanogaster]	CG7028	CG7028	X	X	X	X	X	X	X	X	X	X	X	X	X	X	X	X	5	8	8	5	0	8	10.69	0.00024883	X	X	X	X	X	X	X	X	X	X	X	X
916	0	0	0.000247	1	0	0	0	1	NP_611046.2	NP_611046.2	eukaryotic translation initiation factor 2B subunit gamma [Drosophila melanogaster]	CG8190	eIF2B-gamma	X	X	X	X	X	X	X	X	X	X	X	X	X	X	X	X	X	X	X	X	X	X	X	X	2	3	3	2	0	3	10.33	0.00024695	X	X	X	X
917	0	0	0.000246	1	0	0	0	1	NP_995680.1	NP_995680.1	uncharacterized protein CG33303, isoform A [Drosophila melanogaster]	CG33303	CG33303	X	X	X	X	X	X	X	X	X	X	X	X	X	X	X	X	3	4	4	3	0	4	7.42	0.00024639	X	X	X	X	X	X	X	X	X	X	X	X
918	0	0	0.000237	1	0	0	0	1	NP_649009.1	NP_649009.1	uncharacterized protein CG5589 [Drosophila melanogaster]	CG5589	CG5589	X	X	X	X	X	X	X	X	X	X	X	X	X	X	X	X	2	5	5	2	0	5	6.4	0.00023747	X	X	X	X	X	X	X	X	X	X	X	X
919	0	0	0.00023	1	0	0	0	1	NP_524226.1	NP_524226.1	karyopherin beta 3, isoform A [Drosophila melanogaster]	CG1059	Karybeta3	X	X	X	X	X	X	X	X	X	X	X	X	X	X	X	X	6	9	9	6	0	9	9.77	0.00022978	X	X	X	X	X	X	X	X	X	X	X	X
920	0	0	0.000225	1	0	0	0	1	NP_611409.2	NP_611409.2	uncharacterized protein CG7461, isoform B [Drosophila melanogaster]	CG7461	CG7461	X	X	X	X	X	X	X	X	X	X	X	X	X	X	X	X	4	5	5	4	0	5	10.69	0.00022497	X	X	X	X	X	X	X	X	X	X	X	X
921	0	0	0.00022	1	0	0	0	1	NP_648212.1	NP_648212.1	uncharacterized protein CG7182, isoform A [Drosophila melanogaster]	CG7182	CG7182	X	X	X	X	X	X	X	X	X	X	X	X	X	X	X	X	3	4	4	3	0	4	17.15	0.00021997	X	X	X	X	X	X	X	X	X	X	X	X
922	0	0	0.000216	1	0	0	0	1	NP_652013.1	NP_652013.1	cathD, isoform A [Drosophila melanogaster]	CG1548	cathD	X	X	X	X	X	X	X	X	X	X	X	X	X	X	X	X	2	3	3	2	0	3	8.93	0.0002159	X	X	X	X	X	X	X	X	X	X	X	X
923	0	0	0.000213	1	0	0	0	1	NP_573238.1	NP_573238.1	par-6, isoform A [Drosophila melanogaster]	CG5884	par-6	X	X	X	X	X	X	X	X	X	X	X	X	X	X	X	X	X	X	X	X	X	X	X	X	2	2	2	2	0	2	7.98	0.00021341	X	X	X	X
924	0	0	0.000198	1	0	0	0	2	NP_647811.2;NP_728876.1	NP_647811.2	YTH domain containing 1, isoform A [Drosophila melanogaster]	CG12076	YT521-B	X	X	X	X	X	X	X	X	2	3	3	2	0	3	4.58	0.00019827	X	X	X	X	X	X	X	X	X	X	X	X	X	X	X	X	X	X	X	X
925	0	0	0.000195	1	0	0	0	1	NP_477159.1	NP_477159.1	hemomucin [Drosophila melanogaster]	CG3373	Hmu	X	X	X	X	X	X	X	X	X	X	X	X	X	X	X	X	2	4	4	2	0	4	4.15	0.0001949	X	X	X	X	X	X	X	X	X	X	X	X
926	0	0	0.000168	1	0	0	0	1	NP_649017.1	NP_649017.1	uncharacterized protein CG7430, isoform A [Drosophila melanogaster]	CG7430	CG7430	X	X	X	X	X	X	X	X	X	X	X	X	X	X	X	X	2	3	3	2	0	3	9.33	0.00016793	X	X	X	X	X	X	X	X	X	X	X	X
927	0	0	0.000167	1	0	0	0	2	NP_652059.1;NP_730465.1	NP_652059.1	Su(z)12, isoform A [Drosophila melanogaster]	CG8013	Su(z)12	X	X	X	X	X	X	X	X	2	3	3	2	0	3	3.51	0.0001672	X	X	X	X	X	X	X	X	X	X	X	X	X	X	X	X	X	X	X	X
928	0	0	0.000166	1	0	0	0	1	NP_609645.2	NP_609645.2	uncharacterized protein CG9302 [Drosophila melanogaster]	CG9302	CG9302	X	X	X	X	X	X	X	X	X	X	X	X	X	X	X	X	2	3	3	2	0	3	7.25	0.00016595	X	X	X	X	X	X	X	X	X	X	X	X
929	0	0	0.000158	1	0	0	0	1	NP_569993.1	NP_569993.1	uncharacterized protein CG3071 [Drosophila melanogaster]	CG3071	CG3071	X	X	X	X	X	X	X	X	X	X	X	X	X	X	X	X	1	3	3	1	0	3	3.36	0.0001582	X	X	X	X	X	X	X	X	X	X	X	X
930	0	0	0.000157	1	0	0	0	1	NP_648553.1	NP_648553.1	eukaryotic translation initiation factor 3 subunit l [Drosophila melanogaster]	CG5642	CG5642	X	X	X	X	X	X	X	X	X	X	X	X	X	X	X	X	2	3	3	2	0	3	3.9	0.00015702	X	X	X	X	X	X	X	X	X	X	X	X
931	0	0	0.00015	1	0	0	0	1	NP_726885.1	NP_726885.1	Hsc/Hsp70-interacting protein related, isoform A [Drosophila melanogaster]	CG2947	HIP-R	X	X	X	X	X	X	X	X	X	X	X	X	X	X	X	X	2	2	2	2	0	2	6.9	0.00014966	X	X	X	X	X	X	X	X	X	X	X	X
932	0	0	0.000149	1	0	0	0	1	NP_611460.1	NP_611460.1	uncharacterized protein CG11208 [Drosophila melanogaster]	CG11208	CG11208	X	X	X	X	X	X	X	X	X	X	X	X	X	X	X	X	3	3	3	3	0	3	9.15	0.000149	X	X	X	X	X	X	X	X	X	X	X	X
933	0	0	0.000145	1	0	0	0	3	NP_477266.1;NP_725564.1;NP_725565.3	NP_477266.1	vacuolar H[+] ATPase 44kD subunit, isoform A [Drosophila melanogaster]	CG8048	Vha44	X	X	X	X	X	X	X	X	X	X	X	X	X	X	X	X	2	2	2	2	0	2	11.08	0.00014542	X	X	X	X	X	X	X	X	X	X	X	X
934	0	0	0.00012	1	0	0	0	2	NP_001137776.1;NP_476841.1	NP_001137776.1	recombination repair protein 1, isoform B [Drosophila melanogaster]	CG3178	Rrp1	X	X	X	X	X	X	X	X	X	X	X	X	X	X	X	X	2	3	3	2	0	3	5.81	0.00011988	X	X	X	X	X	X	X	X	X	X	X	X
935	0	0	0.000118	1	0	0	0	1	NP_651245.1	NP_651245.1	uncharacterized protein CG5728 [Drosophila melanogaster]	CG5728	CG5728	X	X	X	X	X	X	X	X	X	X	X	X	X	X	X	X	4	6	6	4	0	6	4.69	0.00011837	X	X	X	X	X	X	X	X	X	X	X	X
936	0	0	0.000118	1	0	0	0	1	NP_611935.1	NP_611935.1	uncharacterized protein CG3511, isoform A [Drosophila melanogaster]	CG3511	CG3511	X	X	X	X	X	X	X	X	X	X	X	X	X	X	X	X	X	X	X	X	X	X	X	X	2	2	2	2	0	2	4.55	0.0001176	X	X	X	X
937	0	0	0.000116	1	0	0	0	1	NP_649378.1	NP_649378.1	uncharacterized protein CG7139 [Drosophila melanogaster]	CG7139	CG7139	X	X	X	X	X	X	X	X	X	X	X	X	X	X	X	X	2	4	4	2	0	4	3.82	0.00011646	X	X	X	X	X	X	X	X	X	X	X	X
938	0	0	0.000115	1	0	0	0	1	NP_523572.1	NP_523572.1	vasa intronic gene, isoform A [Drosophila melanogaster]	CG4170	vig	X	X	X	X	X	X	X	X	X	X	X	X	X	X	X	X	2	2	2	2	0	2	6.94	0.00011515	X	X	X	X	X	X	X	X	X	X	X	X
939	0	0	0.000104	1	0	0	0	2	NP_001246600.1;NP_651974.1	NP_001246600.1	eukaryotic translation initiation factor 5B, isoform D [Drosophila melanogaster]	CG10840	eIF5B	X	X	X	X	X	X	X	X	X	X	X	X	X	X	X	X	3	4	4	3	0	4	3.85	0.00010353	X	X	X	X	X	X	X	X	X	X	X	X
940	0	0	0.000102	1	0	0	0	2	NP_001097629.1;NP_730223.1	NP_001097629.1	neural conserved at 73EF, isoform I [Drosophila melanogaster]	CG11661	Nc73EF	X	X	X	X	X	X	X	X	X	X	X	X	X	X	X	X	3	4	4	3	0	4	5.79	0.00010212	X	X	X	X	X	X	X	X	X	X	X	X
941	0	0	9.5e-05	1	0	0	0	1	NP_608780.1	NP_608780.1	secretory 5 [Drosophila melanogaster]	CG8843	Sec5	X	X	X	X	X	X	X	X	X	X	X	X	X	X	X	X	2	3	3	2	0	3	4.59	9.467e-05	X	X	X	X	X	X	X	X	X	X	X	X
942	0	0	9.4e-05	1	0	0	0	1	NP_650068.1	NP_650068.1	Ranbp9, isoform A [Drosophila melanogaster]	CG5252	Ranbp9	X	X	X	X	X	X	X	X	2	2	2	2	0	2	3.14	9.362e-05	X	X	X	X	X	X	X	X	X	X	X	X	X	X	X	X	X	X	X	X
943	0	0	8.9e-05	1	0	0	0	2	NP_523734.1;NP_725341.1	NP_523734.1	Argonaute-1, isoform B [Drosophila melanogaster]	CG6671	AGO1	X	X	X	X	X	X	X	X	X	X	X	X	X	X	X	X	2	3	3	2	0	3	3.58	8.909e-05	X	X	X	X	X	X	X	X	X	X	X	X
944	0	0	8.8e-05	1	0	0	0	1	NP_572663.1	NP_572663.1	uncharacterized protein CG1582, isoform A [Drosophila melanogaster]	CG1582	CG1582	X	X	X	X	X	X	X	X	X	X	X	X	X	X	X	X	2	4	4	2	0	4	3.88	8.761e-05	X	X	X	X	X	X	X	X	X	X	X	X
945	0	0	8.8e-05	1	0	0	0	2	NP_001261021.1;NP_611095.1	NP_001261021.1	clueless, isoform B [Drosophila melanogaster]	CG8443	clu	X	X	X	X	X	X	X	X	X	X	X	X	X	X	X	X	2	4	4	2	0	4	2.87	8.755e-05	X	X	X	X	X	X	X	X	X	X	X	X
946	0	0	8.2e-05	1	0	0	0	4	NP_001189158.2;NP_001262195.1;NP_730693.1;NP_730694.2	NP_001189158.2	Nopp140, isoform F [Drosophila melanogaster]	CG7421	Nopp140	X	X	X	X	X	X	X	X	X	X	X	X	X	X	X	X	2	2	2	2	0	2	3.5	8.237e-05	X	X	X	X	X	X	X	X	X	X	X	X
947	0	0	8.2e-05	1	0	0	0	1	NP_572906.2	NP_572906.2	uncharacterized protein CG2691, isoform A [Drosophila melanogaster]	CG2691	CG2691	X	X	X	X	X	X	X	X	X	X	X	X	X	X	X	X	3	4	4	3	0	4	3.4	8.154e-05	X	X	X	X	X	X	X	X	X	X	X	X
948	0	0	7.6e-05	1	0	0	0	1	NP_524319.2	NP_524319.2	bloom syndrome helicase [Drosophila melanogaster]	CG6920	Blm	X	X	X	X	X	X	X	X	X	X	X	X	X	X	X	X	X	X	X	X	X	X	X	X	2	3	3	2	0	3	3.63	7.556e-05	X	X	X	X
949	0	0	7.6e-05	1	0	0	0	1	NP_523493.3	NP_523493.3	cup, isoform B [Drosophila melanogaster]	CG11181	cup	X	X	X	X	X	X	X	X	X	X	X	X	X	X	X	X	2	3	3	2	0	3	4.74	7.577e-05	X	X	X	X	X	X	X	X	X	X	X	X
950	0	0	7.5e-05	1	0	0	0	1	NP_609397.2	NP_609397.2	uncharacterized protein CG5355 [Drosophila melanogaster]	CG5355	CG5355	X	X	X	X	X	X	X	X	X	X	X	X	X	X	X	X	2	2	2	2	0	2	6.75	7.463e-05	X	X	X	X	X	X	X	X	X	X	X	X
951	0	0	7.1e-05	1	0	0	0	1	NP_648413.1	NP_648413.1	uncharacterized protein CG6418 [Drosophila melanogaster]	CG6418	CG6418	X	X	X	X	X	X	X	X	X	X	X	X	X	X	X	X	2	2	2	2	0	2	4.8	7.133e-05	X	X	X	X	X	X	X	X	X	X	X	X
952	0	0	6.9e-05	1	0	0	0	1	NP_609490.1	NP_609490.1	uncharacterized protein CG6230 [Drosophila melanogaster]	CG6230	CG6230	X	X	X	X	X	X	X	X	X	X	X	X	X	X	X	X	2	3	3	2	0	3	2.69	6.909e-05	X	X	X	X	X	X	X	X	X	X	X	X
953	0	0	6.8e-05	1	0	0	0	1	NP_476726.2	NP_476726.2	small wing [Drosophila melanogaster]	CG4200	sl	X	X	X	X	X	X	X	X	X	X	X	X	X	X	X	X	2	3	3	2	0	3	3.24	6.847e-05	X	X	X	X	X	X	X	X	X	X	X	X
954	0	0	6.5e-05	1	0	0	0	1	NP_651722.1	NP_651722.1	yata, isoform A [Drosophila melanogaster]	CG1973	yata	X	X	X	X	X	X	X	X	X	X	X	X	X	X	X	X	2	2	2	2	0	2	5.04	6.463e-05	X	X	X	X	X	X	X	X	X	X	X	X
955	0	0	4.9e-05	1	0	0	0	3	NP_001262243.1;NP_001262244.1;NP_649438.1	NP_001262243.1	auxilin, isoform C [Drosophila melanogaster]	CG1107	aux	X	X	X	X	X	X	X	X	X	X	X	X	X	X	X	X	2	2	2	2	0	2	3.82	4.894e-05	X	X	X	X	X	X	X	X	X	X	X	X
956	0	0	4.3e-05	1	0	0	0	1	NP_649135.2	NP_649135.2	lethal (3) 76BDm, isoform A [Drosophila melanogaster]	CG8793	l(3)76BDm	X	X	X	X	X	X	X	X	X	X	X	X	X	X	X	X	2	2	2	2	0	2	2.43	4.278e-05	X	X	X	X	X	X	X	X	X	X	X	X
957	0	0	4e-05	1	0	0	0	4	NP_001162809.1;NP_001245780.1;NP_001285496.1;NP_608396.2	NP_001162809.1	Rho GTPase activating protein at 19D, isoform B [Drosophila melanogaster]	CG1412	RhoGAP19D	X	X	X	X	X	X	X	X	X	X	X	X	X	X	X	X	2	3	3	2	0	3	1.61	4.013e-05	X	X	X	X	X	X	X	X	X	X	X	X
958	0	0	2.5e-05	1	0	0	0	1	NP_572302.2	NP_572302.2	Rabconnectin-3A [Drosophila melanogaster]	CG3585	Rbcn-3A	X	X	X	X	X	X	X	X	X	X	X	X	X	X	X	X	2	3	3	2	0	3	1.17	2.47e-05	X	X	X	X	X	X	X	X	X	X	X	X
959	0	0	2.2e-05	1	0	0	0	1	NP_524786.1	NP_524786.1	kohtalo, isoform A [Drosophila melanogaster]	CG8491	kto	X	X	X	X	X	X	X	X	X	X	X	X	X	X	X	X	2	2	2	2	0	2	1.54	2.229e-05	X	X	X	X	X	X	X	X	X	X	X	X
960	0.059593	1	0.034309	3	7.9e-05	1	754.342	1	NP_476610.2	NP_476610.2	dre4, isoform A [Drosophila melanogaster]	CG1828	dre4	57	6413	6413	57	0	6413	53.74	0.0595931	71	1160	1160	71	0	1160	55.97	0.0492651	65	1469	1469	65	0	1469	56.42	0.0369365	58	501	501	58	0	501	55.79	0.0167242	2	3	3	2
961	0.059226	1	0.031117	3	0.000205	1	288.907	1	NP_523830.2	NP_523830.2	structure specific recognition protein [Drosophila melanogaster]	CG4817	Ssrp	42	4107	4107	42	0	4107	59.2	0.0592263	47	653	653	47	0	653	55.46	0.0430377	34	765	765	34	0	765	50.35	0.0298504	34	395	395	34	0	395	49.1	0.0204626	2	5	5	2
962	0.012601	1	0.013715	3	4.9e-05	1	257.163	1	NP_610793.1	NP_610793.1	uncharacterized protein CG13151 [Drosophila melanogaster]	CG13151	CG13151	26	730	730	26	0	730	56.62	0.0126013	30	248	248	30	0	248	57.95	0.0195654	20	231	231	20	0	231	48.84	0.0107895	26	174	174	26	0	174	50.99	0.0107898	1	1	1	1
963	0.035888	1	0.046304	3	0.000255	1	140.737	1	NP_650001.2	NP_650001.2	Rrp46 [Drosophila melanogaster]	CG4043	Rrp46	10	802	802	10	0	802	56.22	0.0358878	9	82	82	9	0	82	64.81	0.01677	11	491	491	11	0	491	66.95	0.0594501	12	390	390	12	0	390	67.81	0.0626917	1	2	2	1
964	0.137071	1	0.036002	3	0.001581	1	86.6989	1	NP_511052.1	NP_511052.1	actin 5C, isoform B [Drosophila melanogaster]	CG4027	Act5C	22	6644	941	1	5703	4943.18	71.54	0.137071	28	527	91	1	436	396.943	63.83	0.0503054	23	519	27	1	492	469.8	71.01	0.0352495	24	290	10	1	280	225.385	72.61	0.0224511	4	52	0	0
965	0.010112	1	0.018753	3	0.000128	1	79	1	NP_572449.1	NP_572449.1	uncharacterized protein CG2129 [Drosophila melanogaster]	CG2129	CG2129	13	451	451	13	0	451	41.72	0.0101123	24	199	199	24	0	199	57.63	0.0203927	19	242	242	19	0	242	54.62	0.0146821	24	263	263	24	0	263	69.89	0.0211838	1	2	2	1
966	0.021902	1	0.025649	3	0.000399	1	54.8922	1	NP_611807.1	NP_611807.1	Rrp4, isoform A [Drosophila melanogaster]	CG3931	Rrp4	12	626	626	12	0	626	60.74	0.0219021	9	86	86	9	0	86	52.01	0.0137517	12	248	248	12	0	248	55.7	0.0234781	15	316	316	15	0	316	62.42	0.0397166	2	4	4	2
967	0.011995	1	0.014256	3	0.000266	1	45.094	1	NP_523795.2	NP_523795.2	beta-Tubulin at 56D, isoform B [Drosophila melanogaster]	CG9277	betaTub56D	18	516	471	12	45	514.255	59.06	0.011995	16	92	73	11	19	88.9425	57.72	0.00948148	21	349	325	14	24	346.607	66.89	0.0218754	23	140	116	16	24	136.174	71.59	0.01141	2	4	2	1
968	0.058254	1	0.010553	3	0.001581	1	36.8463	1	NP_523625.1	NP_523625.1	actin 42A [Drosophila melanogaster]	CG12051	Act42A	21	6102	400	1	5702	2100.82	69.15	0.0582544	29	474	38	2	436	165.757	64.36	0.0210067	23	495	3	1	492	52.2	71.01	0.00391661	24	283	3	1	280	67.6154	73.14	0.00673533	4	52	0	0
969	0.002592	1	0.005396	3	8.5e-05	1	30.4941	1	NP_477329.1	NP_477329.1	ebi [Drosophila melanogaster]	CG4063	ebi	15	174	174	15	0	174	30.43	0.00259167	14	46	46	14	0	46	28.14	0.00313137	12	162	162	12	0	162	30.43	0.00652896	16	122	122	16	0	122	34.29	0.00652774	2	2	2	2
970	0.007669	1	0.012872	3	0.000264	1	29.0492	2	NP_476772.1;NP_524264.1	NP_476772.1	alpha-Tubulin at 84B [Drosophila melanogaster]	CG1913	alphaTub84B	14	331	331	14	0	331	46.89	0.00766908	13	108	108	13	0	108	38.44	0.0114363	21	249	249	21	0	249	63.33	0.0156104	19	139	139	19	0	139	58.67	0.0115692	2	4	4	2
971	0.016203	1	0.027136	3	0.000602	1	26.9153	1	NP_725517.2	NP_725517.2	Rrp42 [Drosophila melanogaster]	CG8395	Rrp42	13	460	460	13	0	460	68.58	0.016203	13	112	112	13	0	112	63.18	0.0180302	15	345	345	15	0	345	83.45	0.0328817	17	241	241	17	0	241	86.15	0.0304949	3	6	6	3
972	0.014492	1	0.016851	3	0.000594	1	24.3973	1	NP_001097795.1	NP_001097795.1	Rrp6, isoform B [Drosophila melanogaster]	CG7292	Rrp6	42	1251	1251	42	0	1251	54.78	0.0144925	46	267	267	46	0	267	58.89	0.0141365	46	409	409	46	0	409	60.33	0.0128206	58	567	567	58	0	567	68.78	0.0235962	4	18	18	4
973	0.017462	1	0.016619	3	0.00137	1	12.746	1	NP_608791.2	NP_608791.2	spindly [Drosophila melanogaster]	CG15415	Spindly	36	1308	1308	36	0	1308	47.25	0.0174616	30	201	201	30	0	201	40.59	0.0122636	28	284	284	28	0	284	41.74	0.0102588	51	570	570	51	0	570	57.23	0.0273354	10	36	36	10
974	0.012051	1	0.02056	3	0.001029	1	11.7114	1	NP_651246.2	NP_651246.2	Dis3, isoform A [Drosophila melanogaster]	CG6413	Dis3	41	1135	1135	41	0	1135	54.48	0.0120507	44	292	292	44	0	292	58.04	0.0141692	51	751	751	51	0	751	66.19	0.0215752	61	680	680	61	0	680	73.01	0.0259357	6	34	34	6
975	0.104898	1	0.099776	3	0.009581	1	10.9485	1	NP_001015319.1	NP_001015319.1	eukaryotic translation initiation factor 4B, isoform B [Drosophila melanogaster]	CG10837	eIF-4B	41	4618	4618	41	0	4618	76.47	0.104898	43	719	719	43	0	719	72.55	0.0746432	36	1858	1858	36	0	1858	63.62	0.114198	39	1354	1354	39	0	1354	70.15	0.110486	15	148	148	15
976	0.012012	1	0.016882	3	0.001356	1	8.85841	1	NP_726513.1	NP_726513.1	uncharacterized protein CG30428, isoform A [Drosophila melanogaster]	CG30428	CG30428	10	303	303	10	0	303	41.83	0.012012	10	57	57	10	0	57	36.5	0.0103275	13	113	113	13	0	113	50.95	0.0121213	15	198	198	15	0	198	54.75	0.0281975	4	12	12	4
977	0.016224	1	0.028658	3	0.002049	1	7.91801	1	NP_722725.1	NP_722725.1	ribosomal RNA processing 40, isoform A [Drosophila melanogaster]	CG31938	Rrp40	14	361	361	14	0	361	65.52	0.0162236	12	61	61	12	0	61	67.24	0.012529	16	288	288	16	0	288	73.71	0.0350212	17	238	238	17	0	238	75	0.0384229	4	16	16	4
978	0.00435	1	0.010002	3	0.000707	1	6.15276	1	NP_733405.2	NP_733405.2	CIN85 and CD2AP related, isoform C [Drosophila melanogaster]	CG31012	cindr	33	368	368	33	0	368	52.38	0.00435018	28	105	105	28	0	105	45.8	0.00567276	28	235	235	28	0	235	42.18	0.00751669	36	396	396	36	0	396	50.57	0.0168162	9	21	21	9
979	0.004	1	0.013037	3	0.000748	1	5.34759	1	NP_573092.1	NP_573092.1	ribosomal RNA processing 47, isoform A [Drosophila melanogaster]	CG8928	Rrp47	6	61	61	6	0	61	38.99	0.00400001	5	29	29	5	0	29	38.99	0.0086911	6	44	44	6	0	44	39.62	0.00780697	10	96	96	10	0	96	55.97	0.0226139	1	4	4	1
980	0.006018	1	0.010786	3	0.00157	1	3.83312	1	NP_609618.2	NP_609618.2	Ski6, isoform A [Drosophila melanogaster]	CG15481	Ski6	10	142	142	10	0	142	50.81	0.0060184	11	44	44	11	0	44	56.5	0.00852298	11	91	91	11	0	91	59.35	0.010436	13	88	88	13	0	88	63.82	0.0133983	2	13	13	2
981	0.000269	1	0.001279	3	0.000306	1	0.879085	1	NP_477510.1	NP_477510.1	thioredoxin peroxidase 1, isoform A [Drosophila melanogaster]	CG1633	Jafrac1	3	5	5	3	0	5	21.13	0.00026872	3	4	4	3	0	4	21.13	0.0009825	5	13	13	5	0	13	44.85	0.00189047	3	5	5	3	0	5	23.71	0.00096532	1	2	2	1
982	0.000111	1	0.001045	3	0.000474	1	0.234177	1	NP_524210.1	NP_524210.1	actin 79B, isoform A [Drosophila melanogaster]	CG7478	Act79B	12	1291	0	0	1291	4	37.77	0.00011092	16	317	1	1	316	20.3	40.43	0.00257266	10	287	0	0	287	5.5	33.51	0.00041267	14	178	0	0	178	1.5	36.97	0.00014942	3	24	0	0
983	0.000111	1	0.000281	2	0.000474	1	0.234177	1	NP_477091.1	NP_477091.1	actin 87E, isoform A [Drosophila melanogaster]	CG18290	Act87E	14	1304	0	0	1304	4	40.96	0.00011092	19	332	0	0	332	0	40.69	X	13	318	0	0	318	5.5	39.63	0.00041267	17	184	0	0	184	1.5	42.82	0.00014942	3	24	0	0
984	0.048385	1	0.013653	3	0.513242	1	0.0942733	1	Contaminant_sp|TRYP_PIG|	Contaminant_sp|TRYP_PIG|				6	1072	1072	6	0	1072	37.66	0.048385	4	84	84	4	0	84	29.87	0.0173277	3	74	74	3	0	74	21.65	0.00903747	4	90	90	4	0	90	27.71	0.0145926	8	3990	3990	8
985	0.026109	1	0.014264	3	0.165266	1	0.157982	1	Contaminant_KERATIN03|P13645|K1C10_HUMAN	Contaminant_KERATIN03|P13645|K1C10_HUMAN	Keratin, type I cytoskeletal 10			34	1463	1438	29	25	1462.42	61.3	0.0261087	24	168	163	21	5	167.819	49.83	0.0136931	20	327	321	18	6	326.926	44.18	0.015793	27	208	204	25	4	207.458	57.19	0.0133051	33	3249	3221	27
986	0.019845	1	0.008681	3	0.098089	1	0.202316	1	Contaminant_sp|LYSC_LYSEN|	Contaminant_sp|LYSC_LYSEN|	no description			12	512	512	12	0	512	65.06	0.0198448	13	49	49	13	0	49	65.43	0.00867996	10	62	62	10	0	62	66.17	0.00650229	12	78	78	12	0	78	68.77	0.0108603	12	888	888	12
987	0.010609	1	0.010359	3	0.053903	1	0.196817	1	Contaminant_KERATIN13|P04264|K2C1_HUMAN	Contaminant_KERATIN13|P04264|K2C1_HUMAN	Keratin, type II cytoskeletal 1			29	656	625	25	31	655.27	56.21	0.0106087	28	125	111	24	14	124.603	41.93	0.00921966	32	273	260	28	13	272.725	51.71	0.0119472	34	171	156	30	15	170.414	54.81	0.00991105	37	1170	1060	31
988	0.007351	1	0.005564	3	0.033103	1	0.222064	1	Contaminant_KERATIN22|P35908|K22E_HUMAN	Contaminant_KERATIN22|P35908|K22E_HUMAN	Keratin, type II cytoskeletal 2 epidermal			36	507	38	1	469	450.525	65.41	0.00735098	22	79	5	1	74	66.4698	38.65	0.00495676	28	153	10	1	143	142.426	51.96	0.00628804	31	111	7	1	104	92.9322	56.18	0.00544712	44	896	20	1
989	0.005127	1	0.004721	3	0.039987	1	0.128217	1	Contaminant_KERATIN02|P35527|K1C9_HUMAN	Contaminant_KERATIN02|P35527|K1C9_HUMAN	Keratin, type I cytoskeletal 9			19	308	306	18	2	306.346	56.18	0.00512686	12	61	61	12	0	61	35.79	0.00466569	15	77	77	15	0	77	45.43	0.00348682	21	100	100	21	0	100	49.92	0.00601192	25	840	838	24
990	0.001961	1	0.007654	3	0.006406	1	0.306119	1	Contaminant_S68241	Contaminant_S68241	owl|S68241| immunoglobulin light chain (Mab13-1) - mouse (fragment)			4	41	41	4	0	41	29.82	0.0019609	5	34	34	5	0	34	29.82	0.00743184	6	43	43	6	0	43	36.24	0.00556467	4	58	58	4	0	58	27.52	0.0099649	4	47	47	4
991	0.001601	1	0.000813	3	0.002085	1	0.767866	2	Contaminant_NRL_1IKFH;Contaminant_NRL_1INDH	Contaminant_NRL_1IKFH	0 genes:. 2 proteins in this group did not match any genes. Contaminant_NRL_1IKFH:owl|| Immunoglobulin igg1-kappa antibody fragment fab complexed With... ;Contaminant_NRL_1INDH:owl|| Cha255 immunoglobulin fab' fragment (igg1-lambda) complex With... ;			1	35	35	1	0	35	12.28	0.00160052	1	4	4	1	0	4	12.28	0.00083599	1	5	5	1	0	5	12.28	0.00061867	2	6	6	2	0	6	19.74	0.00098564	1	16	16	1
992	0.000926	1	0.00188	3	0.006665	1	0.138935	1	Contaminant_sp|CAS1_BOVIN|	Contaminant_sp|CAS1_BOVIN|	no description			3	19	19	3	0	19	19.16	0.00092569	3	9	9	3	0	9	21.5	0.00200402	5	9	9	5	0	9	29.91	0.00118647	5	14	14	5	0	14	29.91	0.00245028	3	48	48	3
993	0.00057	1	0.003625	3	0.002554	1	0.223179	5	Contaminant_UBIQUITIN08|P62987|RL40_HUMA;NP_476776.1;NP_476778.1;NP_727078.1;NP_728908.1	Contaminant_UBIQUITIN08|P62987|RL40_HUMA	4 genes:RpL40,RpS27A,Ubi-p5E,Ubi-p63E. 1 proteins in this group did not match any genes. Contaminant_UBIQUITIN08|P62987|RL40_HUMA:Ubiquitin-60S ribosomal protein L40 ;NP_476776.1:ribosomal protein L40, isoform A [Drosophila melanogaster] ;NP_476778.1:ribosomal protein S27A [Drosophila melanogaster] ;NP_727078.1:Ubiquitin-5E, isoform A [Drosophila melanogaster] ;NP_728908.1:Ubiquitin-63E, isoform …			3	7	7	3	0	7	26.56	0.00057019	2	6	6	2	0	6	19.53	0.00223365	2	10	10	2	0	10	19.53	0.00220403	3	22	22	3	0	22	29.69	0.00643745	1	11	11	1
994	0.000527	1	0.001023	3	0.00908	1	0.0580396	1	Contaminant_KERATIN05|P02533|K1C14_HUMAN	Contaminant_KERATIN05|P02533|K1C14_HUMAN	Keratin, type I cytoskeletal 14			8	36	20	4	16	23.8777	23.52	0.00052745	5	8	5	3	3	5.48187	13.98	0.00055343	7	16	11	5	5	12.925	19.28	0.00077253	14	31	17	7	14	21.9615	34.96	0.00174269	21	168	108	8
995	0.000473	1	0.001325	3	0.014557	1	0.032493	1	Contaminant_KERATIN17|P13647|K2C5_HUMAN	Contaminant_KERATIN17|P13647|K2C5_HUMAN	Keratin, type II cytoskeletal 5			10	58	12	5	46	26.7816	19.83	0.00047327	8	28	3	2	25	17.9276	14.92	0.00144792	8	32	2	2	30	10.8486	15.42	0.00051874	15	42	12	6	30	31.6541	25.08	0.00200946	28	373	68	17
996	0.000158	1	0.001218	3	0.004258	1	0.0371066	1	Contaminant_KERATIN08|P08779|K1C16_HUMAN	Contaminant_KERATIN08|P08779|K1C16_HUMAN	Keratin, type I cytoskeletal 16			6	22	6	2	16	7.16332	16.91	0.0001579	4	18	15	2	3	16.4456	12.9	0.00165677	5	16	11	3	5	12.925	17.12	0.0007709	11	26	12	4	14	15.5022	26.64	0.00122754	14	103	55	4
997	0.000137	1	0.000261	3	0.013315	1	0.0102891	1	Contaminant_sp|ALBU_BOVIN|	Contaminant_sp|ALBU_BOVIN|	no description			3	8	8	3	0	8	6.92	0.00013741	5	8	8	5	0	8	10.05	0.00062802	1	2	2	1	0	2	2.47	9.295e-05	1	1	1	1	0	1	2.47	6.17e-05	22	272	272	22
998	5.5e-05	1	0.000162	3	0.003257	1	0.0168867	1	Contaminant_KERATIN21|P02538|K2C6A_HUMAN	Contaminant_KERATIN21|P02538|K2C6A_HUMAN	Keratin, type II cytoskeletal 6A			9	53	0	0	53	3	20.04	5.546e-05	8	29	0	0	29	2	16.84	0.00016898	7	32	0	0	32	1	14.01	5.002e-05	13	38	0	0	38	4	26.42	0.00026563	21	350	7	3
999	0.000465	1	0.000607	2	0.004112	1	0.113084	1	Contaminant_sp|CASB_BOVIN|	Contaminant_sp|CASB_BOVIN|	no description			1	10	10	1	0	10	8.48	0.00046546	X	X	X	X	X	X	X	X	1	3	3	1	0	3	8.48	0.00037783	1	5	5	1	0	5	8.48	0.00083603	2	31	31	2
1000	0.000366	1	0.001896	2	0.000521	1	0.702495	1	Contaminant_S49572	Contaminant_S49572	owl|S49572| immunoglobulin kappa chain precursor - human (fragment)			1	4	4	1	0	4	11.4	0.00036583	1	2	2	1	0	2	11.4	0.00083599	X	X	X	X	X	X	X	X	1	9	9	1	0	9	11.4	0.00295692	1	2	2	1
1001	0.000234	1	0.000495	3	0	0	1.79769e+308	1	Contaminant_GLUCREG07|P24067|BIP2_MAIZE	Contaminant_GLUCREG07|P24067|BIP2_MAIZE	Luminal-binding protein 2			2	29	14	1	15	14.9013	4.68	0.00023434	2	11	9	1	2	9.10526	4.68	0.00065441	3	8	5	1	3	6.07634	8.3	0.00025856	2	12	10	1	2	10.1058	4.68	0.0005709	X	X	X	X
1002	0.000116	1	0.000184	3	0	0	1.79769e+308	1	Contaminant_sp|K1C15_SHEEP|	Contaminant_sp|K1C15_SHEEP|	no description			4	19	5	1	14	5.04851	8.61	0.0001162	3	6	2	1	4	2.04819	8.39	0.00021545	3	10	4	1	6	4.07385	6.18	0.00025371	1	1	1	1	0	1	5.96	8.268e-05	5	38	0	0
1003	5.5e-05	1	0.000162	3	0	0	1.79769e+308	1	Contaminant_KERATIN18|P04259|K2C6B_HUMAN	Contaminant_KERATIN18|P04259|K2C6B_HUMAN	Keratin, type II cytoskeletal 6B			10	64	0	0	64	3	21.81	5.546e-05	8	32	0	0	32	2	16.84	0.00016898	8	36	0	0	36	1	15.78	5.002e-05	13	41	0	0	41	4	26.42	0.00026563	18	410	0	0
1004	2.8e-05	1	0.000488	2	0.000994	1	0.028169	1	Contaminant_KERATIN12|Q04695|K1C17_HUMAN	Contaminant_KERATIN12|Q04695|K1C17_HUMAN	Keratin, type I cytoskeletal 17			3	7	1	1	6	1.14928	9.03	2.774e-05	2	3	0	0	3	0	4.63	X	3	7	2	1	5	2.35	10.19	0.00015347	8	19	6	2	13	9.49272	18.75	0.00082302	8	31	13	3
1005	0	0	0.000153	3	5.6e-05	1	0	1	Contaminant_KERATIN16|P19013|K2C4_HUMAN	Contaminant_KERATIN16|P19013|K2C4_HUMAN	Keratin, type II cytoskeletal 4			1	1	0	0	1	0	1.69	X	1	1	1	1	0	1	2.62	8.923e-05	1	3	3	1	0	3	2.62	0.00015849	2	3	3	2	0	3	9.36	0.00021042	2	10	0	0
1006	0	0	0.000465	3	0	0	0	1	Contaminant_KERATIN04|P13646|K1C13_HUMAN	Contaminant_KERATIN04|P13646|K1C13_HUMAN	Keratin, type I cytoskeletal 13			2	6	0	0	6	0	4.8	X	5	8	2	2	6	4.20577	13.97	0.00043758	2	10	6	1	4	6.8	7.42	0.00041886	3	10	6	1	4	6.58537	7.42	0.00053854	3	27	0	0
1007	0.000767	1	0	0	0	0	1.79769e+308	1	Contaminant_sp|K22E_HUMAN|	Contaminant_sp|K22E_HUMAN|	no description			36	473	4	1	469	47.4236	65.74	0.00076659	21	74	0	0	74	0	33.64	X	27	143	0	0	143	0	46.82	X	30	104	0	0	104	0	51.01	X	43	876	0	0
1008	0	0	0.000203	1	0	0	0	3	Contaminant_KERATIN36|Q15323|K1H1_HUMAN;Contaminant_sp|K1H1_HUMAN|;Contaminant_sp|K1HB_HUMAN|	Contaminant_KERATIN36|Q15323|K1H1_HUMAN	0 genes:. 3 proteins in this group did not match any genes. Contaminant_KERATIN36|Q15323|K1H1_HUMAN:Keratin, type I cuticular Ha1 ;Contaminant_sp|K1H1_HUMAN|:no description;Contaminant_sp|K1HB_HUMAN|:no description;			X	X	X	X	X	X	X	X	X	X	X	X	X	X	X	X	1	3	3	1	0	3	5.53	0.00020345	X	X	X	X	X	X	X	X	X	X	X	X
1009	0	0	0	0	0.002189	1	0	1	Contaminant_sp|CASK_BOVIN|	Contaminant_sp|CASK_BOVIN|	no description			X	X	X	X	X	X	X	X	X	X	X	X	X	X	X	X	X	X	X	X	X	X	X	X	X	X	X	X	X	X	X	X	1	14	14	1
1010	0	0	0	0	0.000561	1	0	1	Contaminant_IG08|P01592|IGJ_MOUSE	Contaminant_IG08|P01592|IGJ_MOUSE	Immunoglobulin J chain			X	X	X	X	X	X	X	X	X	X	X	X	X	X	X	X	X	X	X	X	X	X	X	X	X	X	X	X	X	X	X	X	2	3	3	2
1011	0	0	0	0	4.7e-05	1	0	1	Contaminant_KERATIN15|P12035|K2C3_HUMAN	Contaminant_KERATIN15|P12035|K2C3_HUMAN	Keratin, type II cytoskeletal 3			4	26	0	0	26	0	4.78	X	6	17	0	0	17	0	4.94	X	4	16	0	0	16	0	6.05	X	5	16	0	0	16	0	6.85	X	8	131	0	0
											Total Distributed SpC								48341								11372								17755								13556
											Total Contaminant Protein Distributed SpC								4714.9								676.105								1091.08								961.106
											Total Peptides			2944								2804								3496								2903								326
											Total Contaminant Peptides			171								137								144								181								248
											Total Proteins										734								675								831								637
											Total Contaminant Proteins										22								21								23								23
												SDV	AVG
											Spectra FDR (%)	0.0985743	0.154375						0.1075								0.2985								0.0788								0.1327
											Peptides FDR (%)	0.0464048	0.149125	0.2034								0.1069								0.1143								0.1719								0.6098
											Proteins FDR (%)	0.193879	0.627775								0.8108								0.4425								0.479								0.7788
											SHUFFLED_SpC								26								17								7								9
											SHUFFLED_Pep			6								3								4								5								2
											SHUFFLED_Protein										6								3								4								5
										SHUFFLED_NP_001261314.1	FALSE POSITIVE			1	1	1	X	0	1	0.09	X	1	1	1	X	0	1	0.07	X	X	X	X	X	X	X	X	X	X	X	X	X	X	X	X	X	X	X	X	X
										SHUFFLED_NP_524641.1	FALSE POSITIVE			X	X	X	X	X	X	X	X	X	X	X	X	X	X	X	X	1	2	2	X	0	2	2.18	X	X	X	X	X	X	X	X	X	X	X	X	X
										SHUFFLED_NP_001188635.1	FALSE POSITIVE			1	6	6	X	0	6	1.07	X	X	X	X	X	X	X	X	X	X	X	X	X	X	X	X	X	X	X	X	X	X	X	X	X	X	X	X	X
										SHUFFLED_NP_001286244.1	FALSE POSITIVE			X	X	X	X	X	X	X	X	1	14	14	X	0	14	1.64	X	X	X	X	X	X	X	X	X	X	X	X	X	X	X	X	X	X	X	X	X
										SHUFFLED_NP_001246210.1	FALSE POSITIVE			1	5	5	X	0	5	0.33	X	X	X	X	X	X	X	X	X	1	3	3	X	0	3	0.33	X	X	X	X	X	X	X	X	X	X	X	X	X
										SHUFFLED_NP_001189267.1	FALSE POSITIVE			1	4	4	X	0	4	1.64	X	X	X	X	X	X	X	X	X	1	1	1	X	0	1	1.64	X	1	3	3	X	0	3	1.64	X	X	X	X	X
										SHUFFLED_NP_524127.2	FALSE POSITIVE			X	X	X	X	X	X	X	X	X	X	X	X	X	X	X	X	X	X	X	X	X	X	X	X	1	1	1	X	0	1	1.55	X	1	1	1	X
										SHUFFLED_NP_731472.1	FALSE POSITIVE			X	X	X	X	X	X	X	X	X	X	X	X	X	X	X	X	X	X	X	X	X	X	X	X	1	1	1	X	0	1	1.4	X	1	4	4	X
										SHUFFLED_NP_728575.2	FALSE POSITIVE			1	9	9	X	0	9	4.04	X	X	X	X	X	X	X	X	X	1	1	1	X	0	1	4.04	X	1	2	2	X	0	2	4.04	X	X	X	X	X
										SHUFFLED_NP_570067.1	FALSE POSITIVE			1	1	1	X	0	1	12.73	X	1	2	2	X	0	2	12.73	X	X	X	X	X	X	X	X	X	1	2	2	X	0	2	12.73	X	X	X	X	X
[truncated: 23 more columns]
