# Supplementary material for: A Non-stop identity complex (NIC) supervises enterocyte identity and protects from premature aging
Source: eLife journal article supplement (doi:10.7554/elife.62312), 2021-02-25
Supplement: supp [file elife-62312-supp-v1.zip › elife_poa_e62312_Figure_5_figure_supplement_2.pdf]

Figure 5 Fig supp 2: Erez et.al.

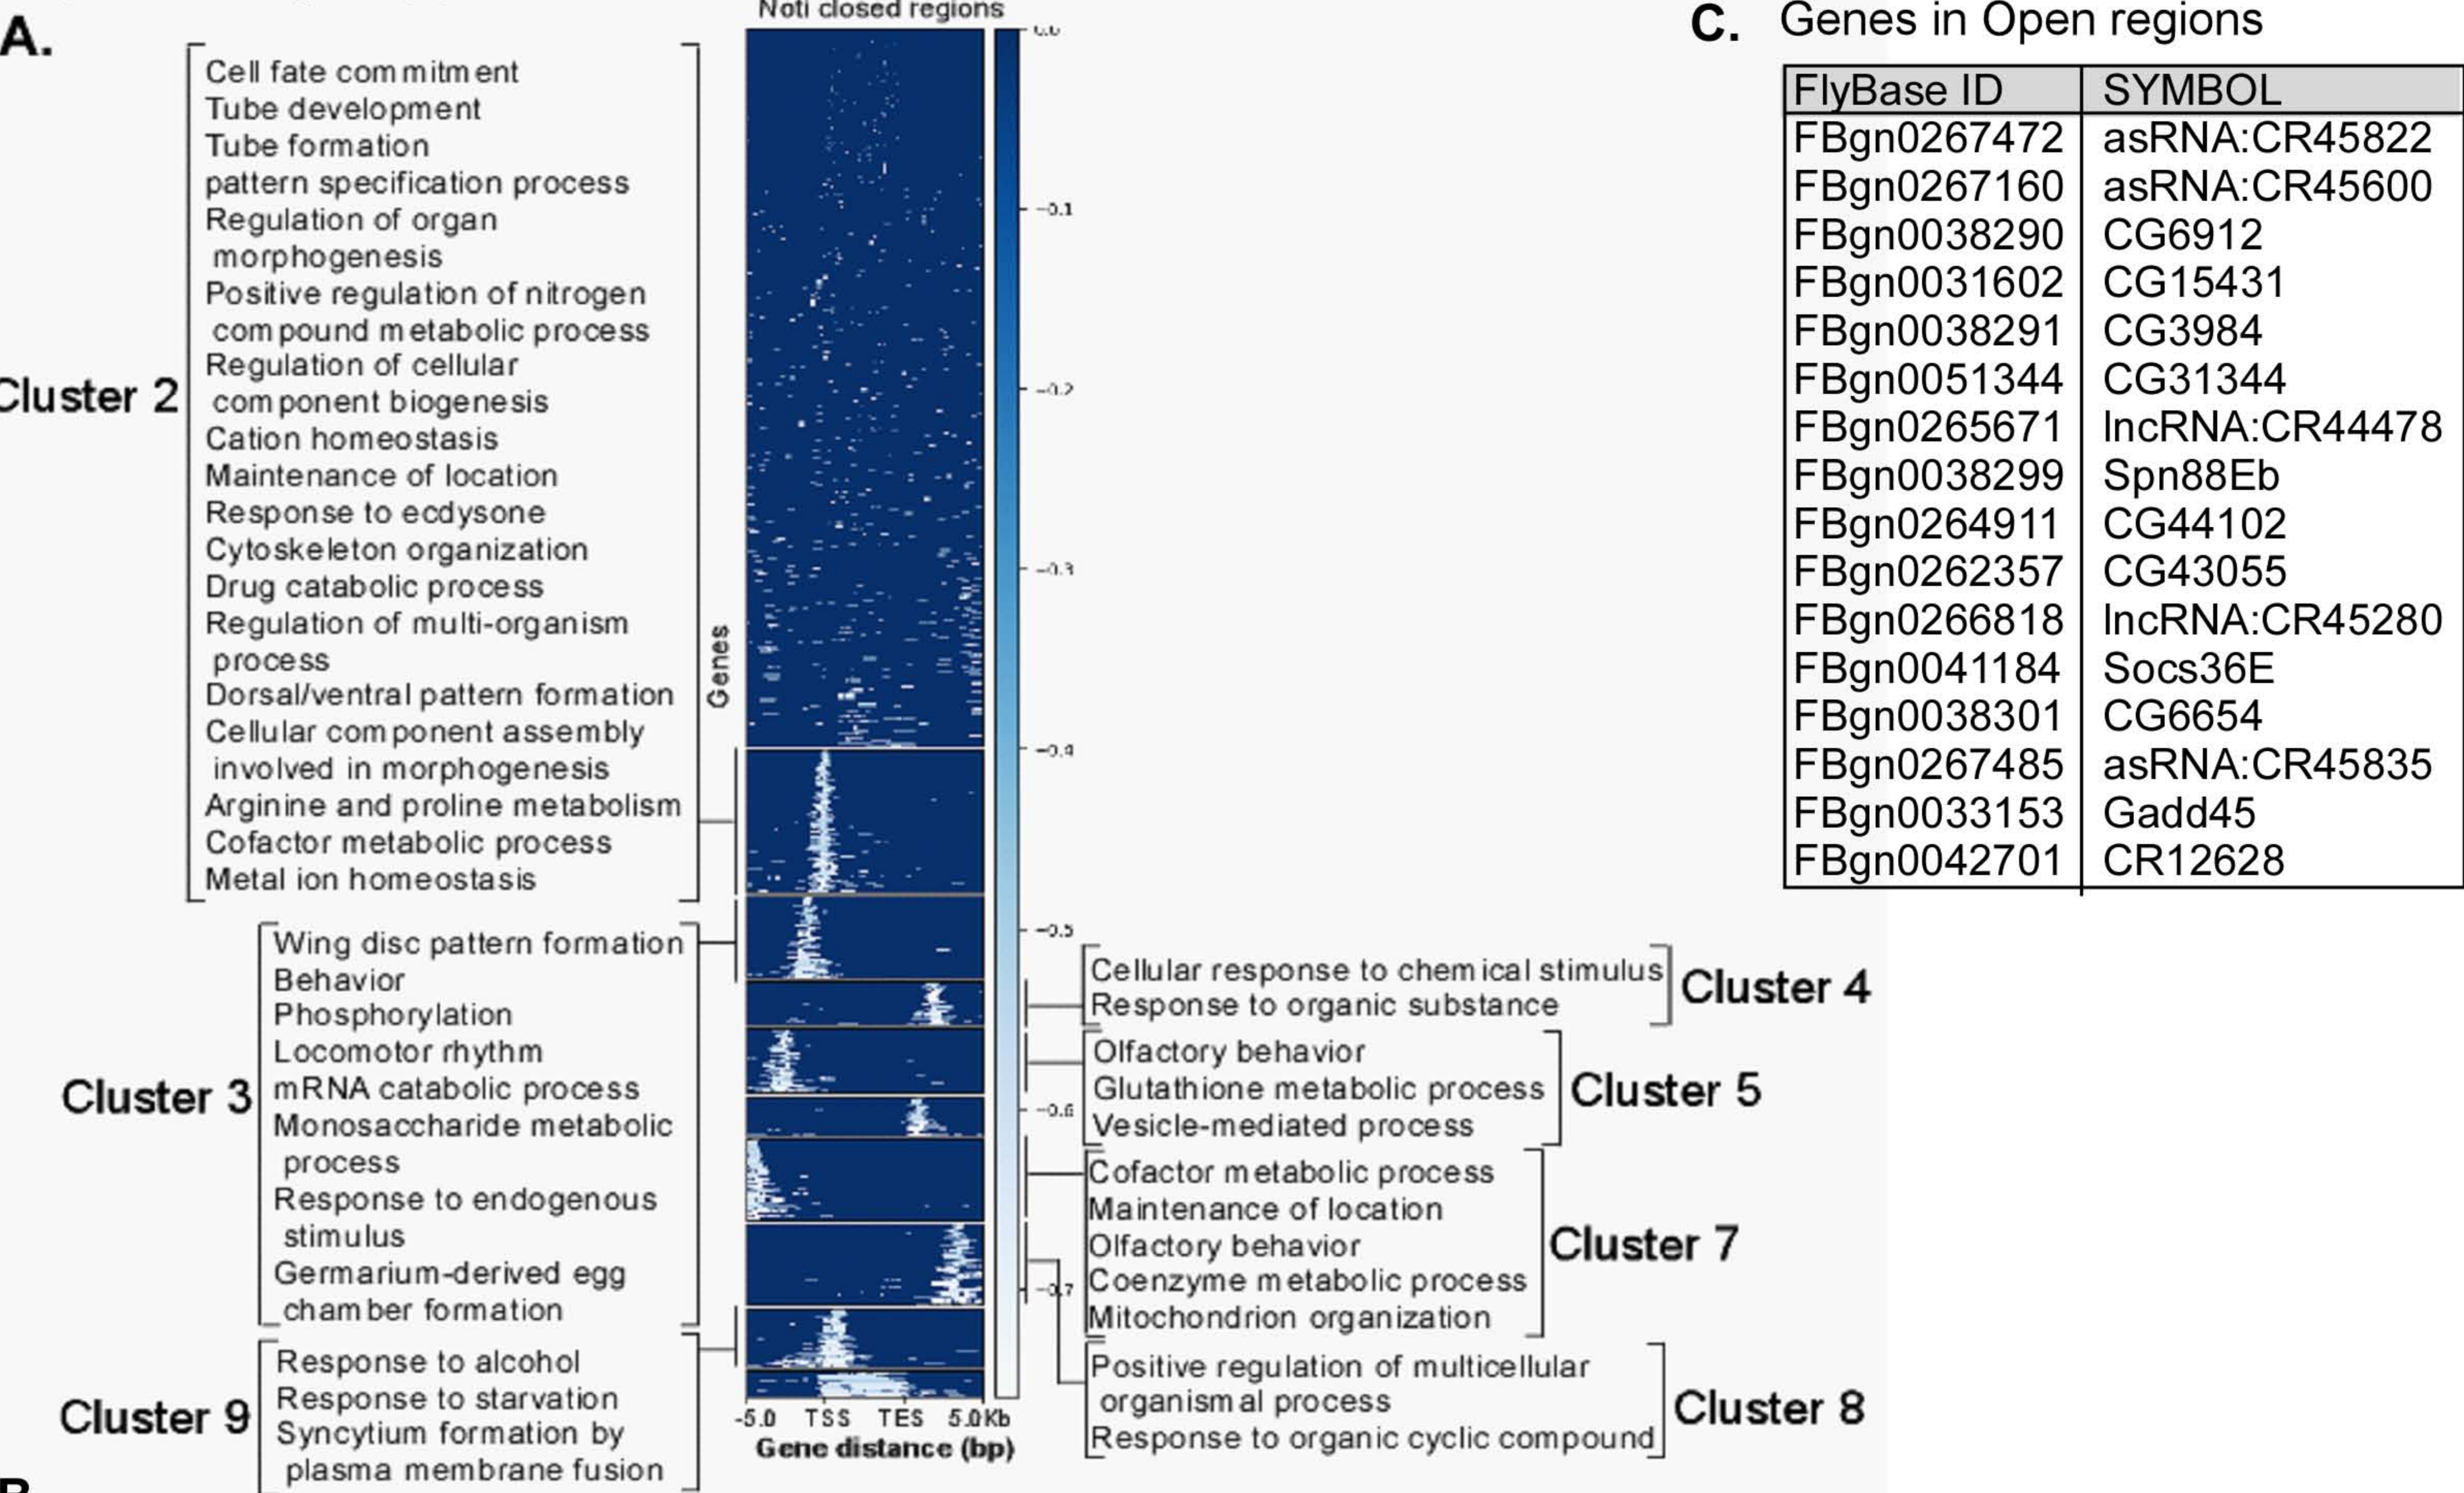

| Cluster | Motif logo (MEME analysis)                                                                                                                                                 | TF name    | Cluster | Motif logo (MEME analysis)                                                                                                                                                     | TF name     |
|---------|----------------------------------------------------------------------------------------------------------------------------------------------------------------------------|------------|---------|--------------------------------------------------------------------------------------------------------------------------------------------------------------------------------|-------------|
| 1       |                                                                                                                                                                            |            | 6       | 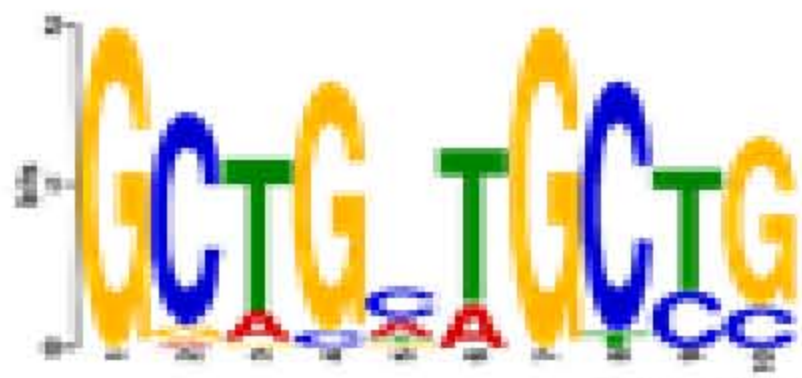                                                                                          | Mad         |
| 2       | 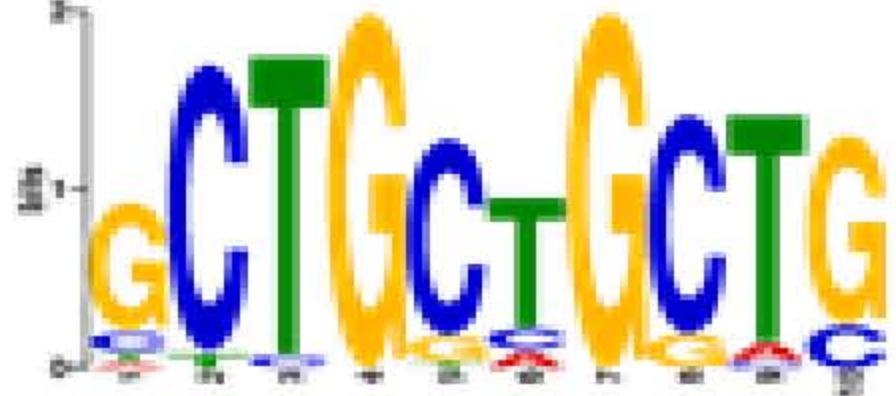                                                                                        | Mad        |         | 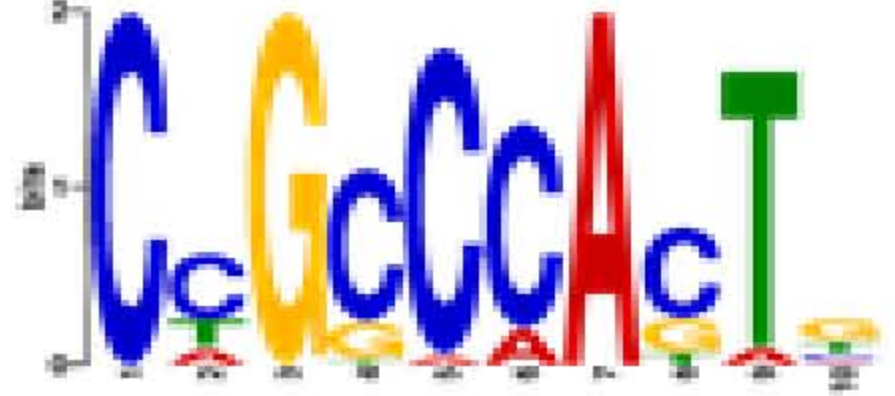                                                                                          | Opa         |
| 3       | 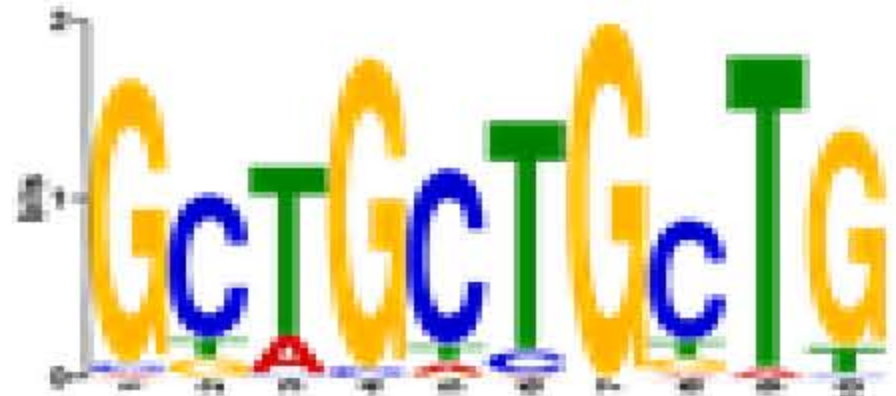                                                                                        | Mad        | 7       | 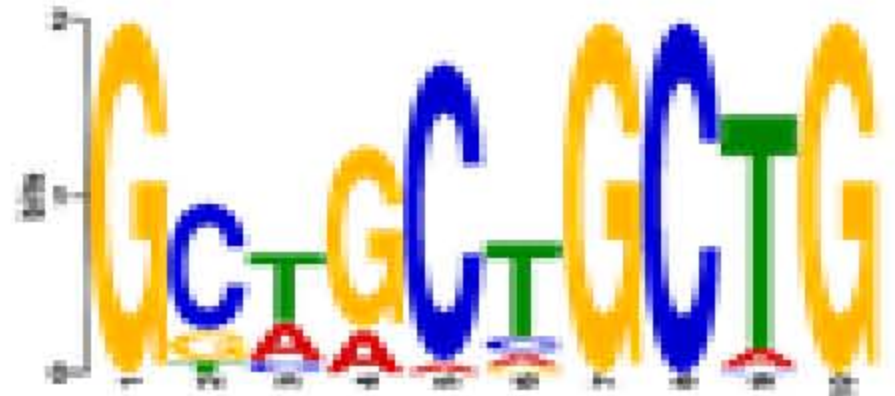                                                                                          | Mad         |
| 4       | 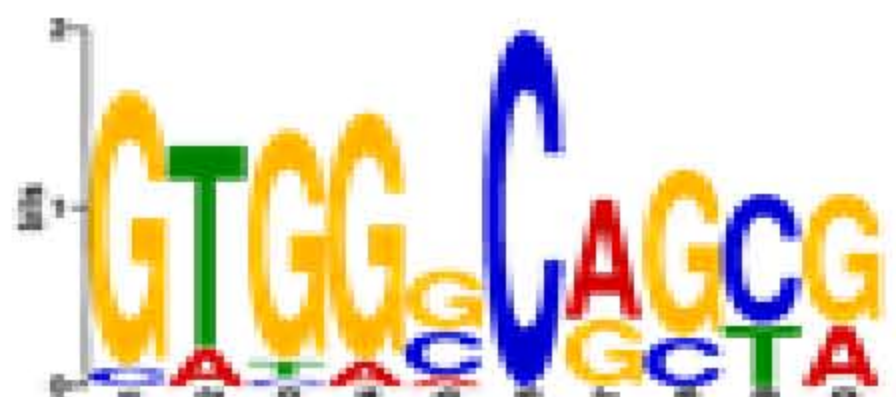<br>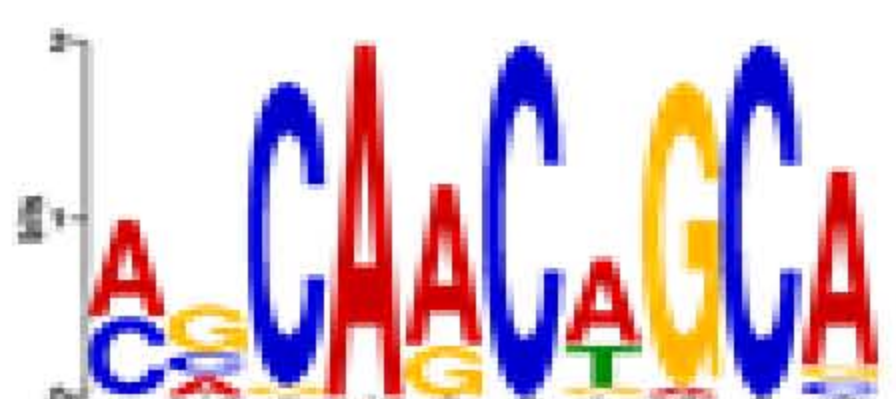 | Mad<br>Odd | 8       | 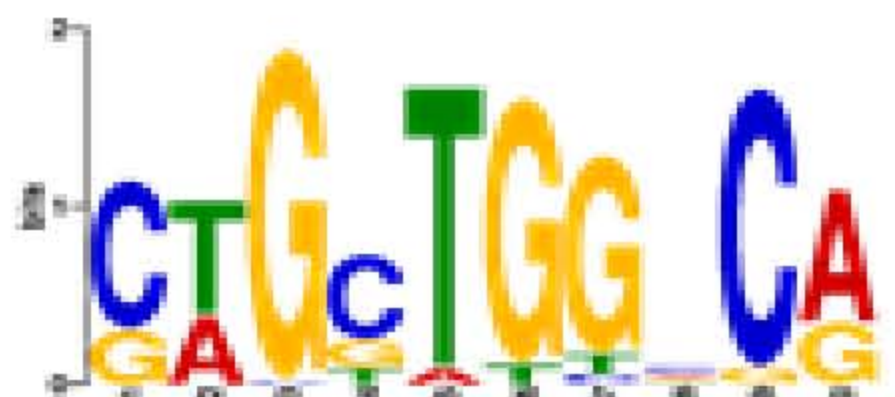<br>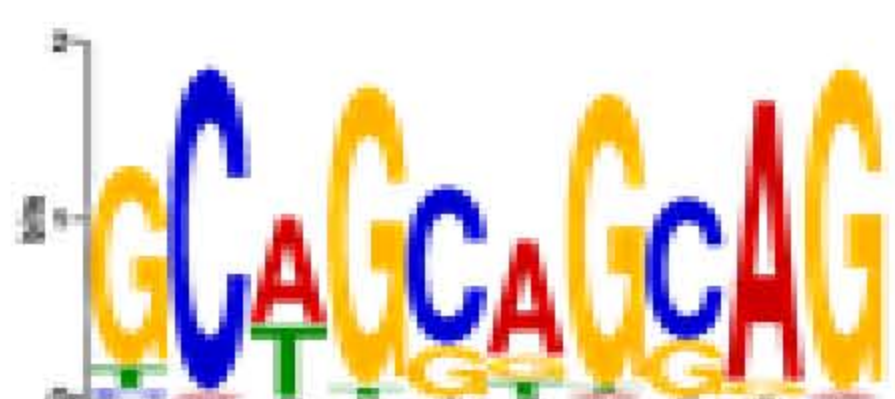 | CTCF<br>Mad |
| 5       | 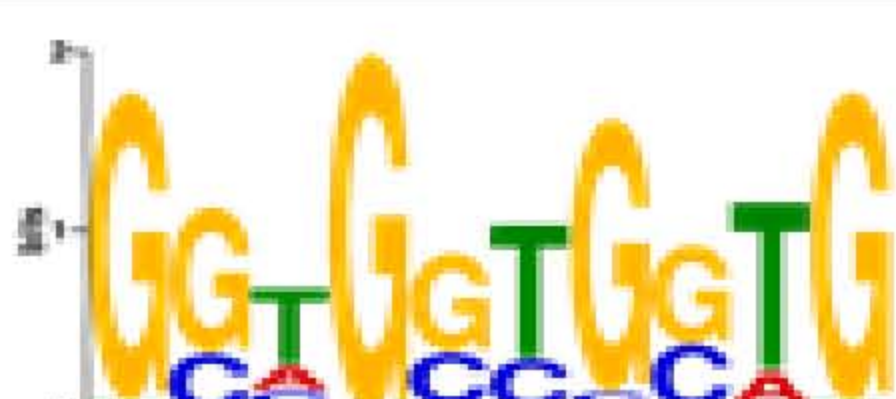<br>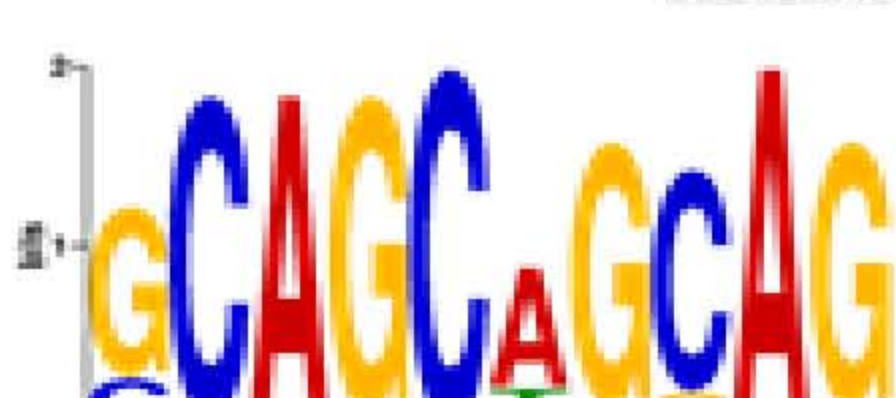 | Mad<br>Odd | 9       | 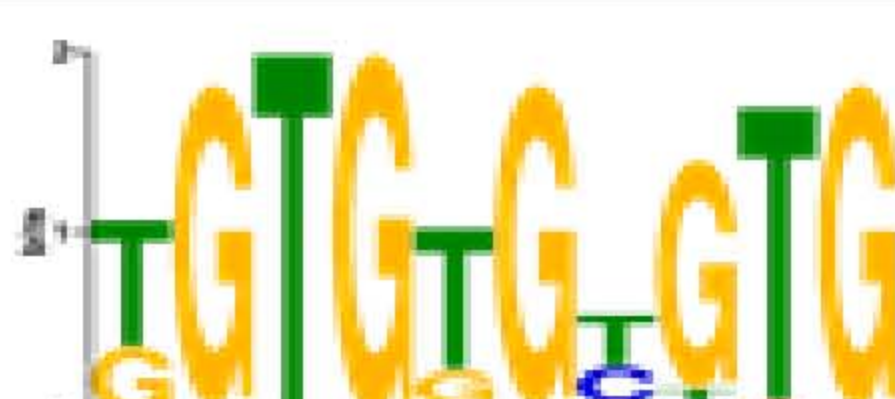                                                                                          | btd         |
|         |                                                                                                                                                                            |            | 10      | 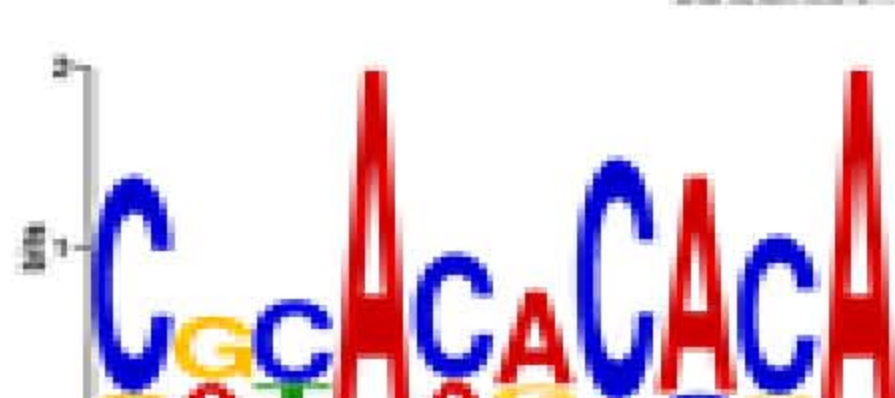                                                                                          | br          |
