# Supplementary material for: A Non-stop identity complex (NIC) supervises enterocyte identity and protects from premature aging
Source: eLife journal article supplement (doi:10.7554/elife.62312), 2021-02-25
Supplement: supp [file elife-62312-supp-v1.zip › elife_poa_e62312_Figure_5_source_data_1.xls]

## Sheet: Data
Symbol	ID	baseMean	log2FoldChange	pvalue	padj
CG1304	FBgn0031141	2071.62	-6.03331	1.18394270841104e-127	1.33572416362933e-123
Zip42C.2	FBgn0033097	1182.8	-4.33597	4.16039410073762e-100	2.34687831222609e-96
CG4302	FBgn0027073	1470.95	-5.92368	8.67177000399175e-100	3.26116363950116e-96
Gcn5	FBgn0020388	1417.36	1.64224	9.64283406629113e-65	2.71976134839741e-61
yip7	FBgn0040060	245570	-3.59484	7.94835802031997e-63	1.793467503705e-59
Cyp6a2	FBgn0000473	374.604	-5.20644	5.88544780246713e-62	1.10666036845724e-58
Dscam4	FBgn0263219	143.184	-6.60367	3.08629970139274e-61	4.97423331873042e-58
CR45600	FBgn0267160	176.4	5.56817	1.29500177698039e-60	1.8262762559866e-57
CR44717	FBgn0265928	321.259	7.8159	6.50804424319729e-58	8.15819501686131e-55
CG9413	FBgn0030574	1915.27	-2.78777	1.70318402336166e-55	1.92153221515663e-52
CG11700	FBgn0029856	166.306	-3.45755	3.34896105259323e-55	3.43481623594153e-52
caix	FBgn0039486	475.316	-2.03373	5.27634789424355e-53	4.96064641190464e-50
CR40469	FBgn0058469	927.329	6.56919	1.08352306967873e-52	9.40331328624263e-50
deltaTry	FBgn0010358	1340.41	-5.00204	1.95998391864342e-51	1.57946704072393e-48
RpA-70	FBgn0010173	1665.16	1.88055	3.2082494376258e-51	2.41303134368628e-48
CG17352	FBgn0035880	399.376	-4.16181	2.58042135093943e-50	1.81951960508117e-47
alc	FBgn0260972	2948.73	-1.24802	7.72408749594674e-50	5.12606794878066e-47
CR32207	FBgn0052207	140.823	-7.60202	1.64460407015896e-49	1.03080128441852e-46
CG10638	FBgn0036290	1801.61	2.19673	9.08109296107629e-48	5.39225740983488e-45
GstE3	FBgn0063497	4513.2	-2.17565	2.37776902872397e-47	1.34129950910319e-44
CG14694	FBgn0037845	680.718	-3.5929	3.25606043590526e-46	1.74927970656586e-43
CR45822	FBgn0267472	138.599	6.48066	1.05314777854767e-45	5.40073328980674e-43
CG6912	FBgn0038290	119.082	5.06678	5.74806783451564e-45	2.81955223082632e-42
Npc2d	FBgn0037782	4185.44	-5.34609	9.33958386299306e-45	4.39038271426199e-42
CG10170	FBgn0039085	3407.12	-1.79437	3.08011846601237e-42	1.38999586134206e-39
Pi3K21B	FBgn0020622	3049.23	2.20359	2.18761551130833e-40	9.49256853791563e-38
CG2909	FBgn0030189	712.066	3.13361	2.68690149567228e-40	1.12272676571017e-37
cv-2	FBgn0000395	1138.18	2.72023	3.31331711684095e-40	1.33503013257856e-37
thetaTry	FBgn0011555	39881.8	-2.7514	8.10282242222619e-40	3.15227732991572e-37
Ac13E	FBgn0022710	1495.83	-1.59151	7.17372621299237e-38	2.69779930449933e-35
CG7881	FBgn0033048	700.153	-2.64948	2.26621360934371e-37	8.24755546471476e-35
CG6330	FBgn0039464	294.252	2.13921	3.23986822615688e-37	1.14225604148443e-34
CG10916	FBgn0034312	498.369	1.53979	1.74187894608356e-36	5.95511462718628e-34
CR45714	FBgn0267278	67.9432	-5.95647	1.0293722664877e-35	3.41569938544535e-33
CG13813	FBgn0036956	78.0478	-5.15302	1.25891439314458e-35	4.0580206238449e-33
CG14500	FBgn0034318	3568.18	-3.95175	2.11687969449306e-35	6.6340657536863e-33
CG8539	FBgn0035791	439.933	-3.81472	4.34599279787653e-35	1.32517542555792e-32
Mocs1	FBgn0263241	1315.81	1.91873	5.06148492995221e-35	1.50272823630844e-32
toy	FBgn0019650	111.446	7.15904	6.27104103150822e-35	1.81409961326861e-32
mthl9	FBgn0035131	164.812	-3.70343	8.27245526757253e-35	2.33324600821883e-32
Tektin-C	FBgn0035638	55.0186	-5.36626	2.25376973982352e-34	6.20171468407047e-32
PH4alphaPV	FBgn0051015	403.549	-3.7504	2.95363260649073e-34	7.93401977772104e-32
CG15209	FBgn0030237	2275.72	-2.39679	1.38719267199442e-33	3.63960644777698e-31
Ku80	FBgn0041627	453.626	1.80605	2.02311393868871e-33	5.18744805824681e-31
exu	FBgn0000615	425.783	1.33366	2.18822403576839e-33	5.48612079367532e-31
CG14820	FBgn0035718	5411.95	-2.55508	4.73197739578259e-33	1.16056889085259e-30
Ugt86Dg	FBgn0040253	212.008	-3.51972	7.05375944935652e-33	1.69320242782213e-30
CG42489	FBgn0259992	170.967	-1.79419	7.78088598028397e-33	1.82883240894925e-30
MFS9	FBgn0038799	261.578	-2.31742	8.94553409333323e-33	2.05966358450991e-30
GstD5	FBgn0010041	962.268	3.69834	9.14835460035517e-33	2.06423473202414e-30
CG13284	FBgn0032614	1931.57	-3.20162	2.44157070638207e-32	5.4011373940005e-30
RanGAP	FBgn0003346	468.219	1.25677	3.595678528233e-32	7.80123945298552e-30
GstE5	FBgn0063495	753.381	-2.67043	4.13751370011341e-32	8.80743954050556e-30
CG8562	FBgn0035779	16471.1	-3.73828	6.85484408325818e-32	1.42525226279649e-29
CG18493	FBgn0038701	13552	-2.54412	6.94813636357088e-32	1.42525226279649e-29
CG14715	FBgn0037930	393.777	-2.49258	5.01565052321287e-31	1.01047445005156e-28
Ssrp	FBgn0010278	1059.01	1.88461	5.65960954863814e-31	1.12020552504799e-28
sda	FBgn0015541	4386.37	2.05551	6.27077414881156e-31	1.21977368873952e-28
iotaTry	FBgn0015001	5490.69	-2.64813	9.67218541580783e-31	1.84951857391769e-28
CG32302	FBgn0052302	103.682	4.31581	1.52387390665402e-30	2.86539090247844e-28
feo	FBgn0030241	85.4193	3.56942	4.93767221036582e-30	9.13226522579462e-28
Cyp4d14	FBgn0023541	1138.66	-3.6789	6.87145920975467e-30	1.25038391620084e-27
CG42249	FBgn0259101	13623.8	-1.71141	8.31529352420282e-30	1.4890974847628e-27
CG1774	FBgn0039856	952.036	-2.53819	9.27897069025108e-30	1.63570855199082e-27
CG5246	FBgn0038484	1693.71	-3.78431	9.90649552029465e-30	1.71946280707637e-27
CG9646	FBgn0034184	939.459	1.47476	1.01493433657098e-29	1.73492260381724e-27
CG18585	FBgn0031929	6067.72	-2.20914	1.2153840045652e-29	2.04656154320965e-27
CG10116	FBgn0036367	4893.47	-1.63575	3.05427587679514e-29	5.06740300617689e-27
Csp	FBgn0004179	3095.83	-1.39217	3.14399510798385e-29	5.11946212399093e-27
Sugb	FBgn0036191	830.601	-1.73976	3.17640798333066e-29	5.11946212399093e-27
pncr009:3L	FBgn0062928	554.129	-3.01867	3.8356099450212e-29	6.09483822531397e-27
GstE7	FBgn0063493	2785.23	-1.83034	5.17203366039132e-29	8.10428941062984e-27
Ggt-1	FBgn0030932	1211.16	-1.29201	5.32549674512935e-29	8.23044579158211e-27
CG10165	FBgn0032801	2042	-1.26733	7.18792895850534e-29	1.09586776364672e-26
CG3008	FBgn0031643	1471.89	1.44345	9.43087852301516e-29	1.41865561995543e-26
Kua	FBgn0032850	368.547	-1.4421	1.41958097875278e-28	2.10733060556433e-26
His2Av	FBgn0001197	1738.29	1.2521	1.57403820364477e-28	2.30627259915849e-26
wfs1	FBgn0039003	502.178	1.89252	2.38653269892258e-28	3.45190537298007e-26
CR43493	FBgn0263504	134.772	-2.03776	3.91358153852465e-28	5.58899074906774e-26
CG8560	FBgn0035781	15571	-3.35954	5.95842265089624e-28	8.40286554342643e-26
CG8128	FBgn0030668	2690.1	-1.19004	7.49318035761474e-28	1.04367976289641e-25
Ote	FBgn0266420	95.5034	2.79547	1.01927623845196e-27	1.40237494173354e-25
CG15771	FBgn0029801	1746.86	-1.77898	1.2266434095179e-27	1.66734830676879e-25
CG15253	FBgn0028948	520.132	-4.53875	1.254828496448e-27	1.68535417820551e-25
t	FBgn0086367	216.543	-2.35848	2.00151370933596e-27	2.65659737279157e-25
alpha-Est4	FBgn0015572	376.046	-2.8704	2.96785981603771e-27	3.89341795866715e-25
Phk-3	FBgn0035089	460.988	3.30136	3.03906486752485e-27	3.94100342935809e-25
CG7408	FBgn0036765	681.261	-3.08899	3.34957082079684e-27	4.29430204548068e-25
CG11289	FBgn0031887	44.4451	-5.82761	4.52371502909044e-27	5.73444415260656e-25
Seipin	FBgn0040336	2368.19	-1.71337	6.26946372666557e-27	7.85912108491566e-25
dnc	FBgn0000479	1339.69	-1.52317	6.3530499917464e-27	7.87638571504208e-25
Vap-33A	FBgn0029687	2890.46	-0.902285	7.07214657190435e-27	8.67260408958966e-25
CG11149	FBgn0031732	1698.33	-1.67449	7.70985450149346e-27	9.35296542858594e-25
CG31041	FBgn0051041	5229.15	-1.99677	7.91304677122763e-27	9.49733975244576e-25
CG3734	FBgn0038700	8265.51	-1.68869	1.22692911757238e-26	1.45707518994227e-24
CG9360	FBgn0030332	365.464	4.74787	1.92350003084284e-26	2.26051326541343e-24
Dcp-1	FBgn0010501	944.743	-1.80492	4.27210870473509e-26	4.96885880482693e-24
CG6283	FBgn0039474	2754.99	-3.9203	7.15827923010716e-26	8.24078635449683e-24
CG5921	FBgn0029835	1962.39	-1.09084	9.16883584433174e-26	1.04487682823991e-23
LBR	FBgn0034657	205.415	1.49841	1.17478569103201e-25	1.32539321662232e-23
CG4300	FBgn0036272	622.828	1.02298	1.37837785276377e-25	1.53520698803205e-23
CG14302	FBgn0038647	68.6617	4.99293	1.38797299042075e-25	1.53520698803205e-23
NLaz	FBgn0053126	1060.76	-1.91661	1.84783411753702e-25	2.02400626350026e-23
Jon99Cii	FBgn0003356	80706.6	-3.96607	1.94727185990743e-25	2.11241549264189e-23
Sdic3	FBgn0052823	34.8655	-6.04986	2.1574551900163e-25	2.3181342336918e-23
CG9672	FBgn0030777	6812.35	-2.13321	3.9884868848835e-25	4.24510462596751e-23
Mtap	FBgn0034215	1720.03	-1.14474	9.24648513496056e-25	9.74942479370327e-23
CR45943	FBgn0267605	82.6164	-2.32251	1.41846151130651e-24	1.4817669232e-22
r	FBgn0003189	632.117	1.33913	1.60798780990436e-24	1.65829328528992e-22
HDAC6	FBgn0026428	1960.15	-1.74133	1.61684330244542e-24	1.65829328528992e-22
CG5892	FBgn0038873	69.8699	-5.74364	2.09121144469763e-24	2.12549977649357e-22
Fancl	FBgn0037781	792.961	-1.80079	2.78590324301907e-24	2.80630003461975e-22
CG17633	FBgn0032144	70138.6	-1.7388	3.054388052454e-24	3.04952265555628e-22
CG17119	FBgn0039045	2894.72	-2.19454	3.32129474761485e-24	3.28691643356059e-22
CG10472	FBgn0035670	134965	-1.57611	3.41237542455673e-24	3.34768865563905e-22
grp	FBgn0261278	826.498	1.76413	4.56127783786875e-24	4.43623591093408e-22
CG3819	FBgn0036833	5705.16	-4.5308	5.01204875236668e-24	4.83298581403426e-22
cnn	FBgn0013765	448.22	2.2599	5.74137928087062e-24	5.48934246159173e-22
CG32483	FBgn0052483	2949.28	-2.00901	5.97972836764439e-24	5.66918449107261e-22
Hex-A	FBgn0001186	8757.68	1.62361	6.12522066539508e-24	5.75872829558227e-22
CG12057	FBgn0030098	88920.7	-3.21758	7.09957755178185e-24	6.61962263960354e-22
CG15784	FBgn0029766	11648.1	-1.9302	1.33780658387979e-23	1.23714212125671e-21
Cyp6a9	FBgn0013771	1270.22	-1.12989	1.55175387027136e-23	1.42332415970744e-21
CG34330	FBgn0085359	19467.6	-1.87434	1.70924471480099e-23	1.55513700583748e-21
CG10163	FBgn0035697	64.2533	-3.0713	2.06823173903851e-23	1.8667032383866e-21
Pi4KIIalpha	FBgn0037339	1632.93	1.04278	2.20353716283568e-23	1.973040180247e-21
CG1809	FBgn0033423	8552.44	-2.63034	2.25628966496076e-23	2.00436692914074e-21
CG15385	FBgn0031397	269.34	-2.05668	4.0191321741172e-23	3.54248821784299e-21
CG14695	FBgn0037850	126.381	3.6096	4.26546941006983e-23	3.73046712282231e-21
CG11893	FBgn0039316	600.205	-6.38629	7.250309447059e-23	6.29215316782458e-21
CG3448	FBgn0035996	211.444	2.5468	7.40884520132262e-23	6.38065584437571e-21
CG9509	FBgn0030594	5481.14	-4.06054	8.31846762020465e-23	7.10976906751127e-21
CG8952	FBgn0030688	9965.6	-2.27932	1.35874393594586e-22	1.15258263799558e-20
Orc2	FBgn0015270	58.4937	2.96681	1.50636331325415e-22	1.26826797762189e-20
lectin-28C	FBgn0040099	225.182	-2.03103	1.55699109298043e-22	1.30118322303742e-20
CG10420	FBgn0039296	685.219	-1.1548	2.69584110659833e-22	2.23635877681194e-20
CG2811	FBgn0035082	816.198	-1.06942	3.22829234961742e-22	2.65851053199881e-20
Thor	FBgn0261560	3478.34	-1.96662	3.35492571759389e-22	2.74277332941263e-20
Ntf-2	FBgn0031145	1812.19	1.05237	3.99395999100847e-22	3.23699825198759e-20
CG32195	FBgn0052195	304.231	-2.70982	4.01683881650649e-22	3.23699825198759e-20
dpa	FBgn0015929	263.134	1.90157	4.63614227817348e-22	3.70957143137257e-20
Hsp60	FBgn0015245	8736.41	1.01849	5.15261730611482e-22	4.09379073574559e-20
CG4741	FBgn0035040	1202.18	-2.0287	5.37303524046832e-22	4.23906178901843e-20
Sod3	FBgn0033631	1189.51	-1.48714	5.88247665723656e-22	4.60875705881548e-20
obe	FBgn0038344	1518.11	1.30843	7.16420908990373e-22	5.57424875533061e-20
veil	FBgn0034225	10459.9	-1.52654	9.19485853330017e-22	7.10523246388305e-20
ClC-a	FBgn0051116	1067.62	-2.34636	1.07945812740094e-21	8.28465754648801e-20
Jon99Ciii	FBgn0003357	76777.7	-3.79509	1.11598187643403e-21	8.50709968238426e-20
Cnx14D	FBgn0264077	37.2504	5.0869	1.41854275813514e-21	1.07409391928058e-19
CG7130	FBgn0037151	352.896	1.85651	1.47246772510119e-21	1.10749205830611e-19
CG3868	FBgn0036422	39600.9	-2.48457	1.87794167836223e-21	1.40310847783329e-19
Gyc-89Da	FBgn0038435	24.3098	-5.91401	2.18546304765492e-21	1.62213119102913e-19
ver	FBgn0262524	166.311	1.9878	2.52216019322778e-21	1.85980466013045e-19
CG18596	FBgn0038953	680.19	1.33926	2.58915936426695e-21	1.89681142517271e-19
ome	FBgn0259175	7800.02	-1.94153	2.80203409673984e-21	2.03951926963992e-19
Phae1	FBgn0263234	2850.93	-1.35374	2.93587807623028e-21	2.12324208051474e-19
Galk	FBgn0263199	1367.38	-1.16763	2.99129041584534e-21	2.14953748226542e-19
Pdxk	FBgn0085484	3308.65	-1.382	3.395556809051e-21	2.42459948858946e-19
mus205	FBgn0002891	268.542	1.39628	3.60316870760822e-21	2.55666348171295e-19
CS-2	FBgn0029091	5928.08	-1.81041	3.70488050714105e-21	2.61240386759783e-19
CG7470	FBgn0037146	7980.18	-1.81598	4.37102523129159e-21	3.0629755689088e-19
CG17271	FBgn0038829	1949.28	-1.81628	4.47136271618161e-21	3.11394531876302e-19
CG30047	FBgn0050047	1637.18	-2.91415	4.50922612917558e-21	3.12104841652509e-19
RnrL	FBgn0011703	479.129	2.99542	4.90017640055195e-21	3.37096281408701e-19
CG31183	FBgn0051183	436.892	-1.38081	5.5055959473414e-21	3.76449293805489e-19
Uch	FBgn0010288	1289.29	1.29118	5.82335956722561e-21	3.95777967695418e-19
CG14857	FBgn0038262	113.274	-2.21705	6.31060208952242e-21	4.26324627389173e-19
CG17191	FBgn0039473	30.1129	-4.96516	7.15000898109465e-21	4.80157150742321e-19
pyd	FBgn0262614	670.818	-1.08254	7.39229699322523e-21	4.93490501050693e-19
CG6996	FBgn0036950	66.4973	4.10305	9.23070708793725e-21	6.12593160977106e-19
Tsp42Eg	FBgn0033128	960.112	-2.47999	1.3794891914047e-20	9.10140178796948e-19
MtnA	FBgn0002868	28188	-3.12402	1.7374282284349e-20	1.13963170193038e-18
axo	FBgn0262870	2472.74	-2.13303	1.8232535470283e-20	1.18901424957071e-18
Jon65Ai	FBgn0035667	30995.2	-3.33715	1.91891458676835e-20	1.24420657286899e-18
Cht4	FBgn0022700	1727.58	1.888	2.09374213566766e-20	1.349805644263e-18
Arc1	FBgn0033926	25690.6	2.28534	2.50334101441575e-20	1.60469848435446e-18
Dat	FBgn0019643	6339.26	-1.64875	3.41976491121341e-20	2.17976201854857e-18
CG17167	FBgn0039941	3012.02	-2.34346	3.59185646211289e-20	2.27659126997515e-18
CG4630	FBgn0033809	440.377	-1.68327	3.71110171551392e-20	2.3390307013647e-18
CR44138	FBgn0264987	564.711	2.69863	3.98167180657462e-20	2.49562340676527e-18
Drsl2	FBgn0052279	86.6499	3.95722	4.01976057039082e-20	2.50557672680383e-18
Mcm2	FBgn0014861	133.122	2.21216	4.11086944646316e-20	2.54828731291194e-18
Lam	FBgn0002525	758.904	1.09599	4.32832819813927e-20	2.66842616018619e-18
CG16771	FBgn0032779	1634.42	-1.52067	5.14303567383408e-20	3.1534635039237e-18
alphaTry	FBgn0003863	232528	-2.1432	5.54501940664267e-20	3.38156264571582e-18
CG8129	FBgn0037684	329.274	-2.49648	6.04849673456278e-20	3.66877097630846e-18
CG15255	FBgn0028950	23868.7	-1.41504	6.53230854545968e-20	3.94104304865647e-18
CG10827	FBgn0038845	9430.85	-1.95425	8.10369102168475e-20	4.86307670780039e-18
CG11686	FBgn0040551	899.633	-1.33651	9.73349638503775e-20	5.81022784211618e-18
CG4053	FBgn0038482	938.2	-3.67804	9.91096606845989e-20	5.88502732549287e-18
Hop	FBgn0024352	3556.61	0.992573	1.07807448277151e-19	6.36797712807758e-18
wit	FBgn0024179	835.737	-1.48122	1.11928866472715e-19	6.57698683096444e-18
Mcm5	FBgn0017577	117.832	2.87108	1.14320477097855e-19	6.6827130705596e-18
Ubc2	FBgn0015320	1006.25	0.807246	1.24044488242575e-19	7.21376245542644e-18
CG4250	FBgn0034761	291.349	3.25592	1.30876802943053e-19	7.57206200412064e-18
Hmgs	FBgn0010611	2429.91	0.773398	1.47050633678746e-19	8.46441453654906e-18
zetaTry	FBgn0011556	4851.05	-3.52136	1.52879276189101e-19	8.75524870033216e-18
PCNA	FBgn0005655	416.494	3.11438	1.79240761018574e-19	1.02131023525836e-17
CG14205	FBgn0031034	3510.19	-4.06303	1.83173164960082e-19	1.03847218446213e-17
CG33127	FBgn0053127	9322.98	-1.54072	1.84931710231671e-19	1.04319977741686e-17
FeCH	FBgn0266268	1438.98	1.1678	1.95421501903783e-19	1.09688825098432e-17
CG18131	FBgn0031343	21.3897	-4.20253	2.04359220096606e-19	1.14137659461877e-17
CG11911	FBgn0031249	43678	-3.24323	2.08519945265114e-19	1.15887784358671e-17
CG31265	FBgn0051265	1751.2	-2.50873	2.32758467779599e-19	1.28724560465168e-17
CG14688	FBgn0037819	436.163	-2.66611	2.65691296155776e-19	1.46220936742901e-17
RPA2	FBgn0032906	272.912	2.22239	2.72017024451704e-19	1.48975537372045e-17
CG7542	FBgn0036738	18862.5	-3.5999	2.75760971280211e-19	1.50296390240741e-17
MYPT-75D	FBgn0036801	2461.88	-1.09674	2.85434598254203e-19	1.54080054426025e-17
Cyp9f3Psi	FBgn0038034	915.803	-2.02114	2.84721310756889e-19	1.54080054426025e-17
Hus1-like	FBgn0026417	156.915	1.7425	4.13701734401454e-19	2.22256331786534e-17
CG3625	FBgn0031245	10176.8	-1.5629	4.20270960626065e-19	2.24715496577406e-17
Cyp12a4	FBgn0038681	6778.46	-1.80178	4.34184537252524e-19	2.31059903268065e-17
CG33965	FBgn0053965	573.666	-3.289	4.61773631851342e-19	2.44588268288584e-17
CG15829	FBgn0035743	2682.75	2.71529	4.99493665856695e-19	2.63331193373609e-17
CG5070	FBgn0030824	95.6541	5.41814	6.53934180580175e-19	3.42295144915004e-17
CG7627	FBgn0032026	1265.92	0.878606	6.55342592639965e-19	3.42295144915004e-17
CG12355	FBgn0040805	322.343	-1.37102	7.10369854662304e-19	3.69326852548392e-17
CG7322	FBgn0030968	809.541	-1.70558	7.40533258573915e-19	3.83242946019766e-17
daw	FBgn0031461	221.321	-3.32364	8.00138471726231e-19	4.12199188950472e-17
CG4753	FBgn0036622	12360	-1.13455	8.2077483924293e-19	4.2090826074267e-17
CG8177	FBgn0036043	4515.49	-2.30089	8.95040939600187e-19	4.56916374686394e-17
CG32444	FBgn0043783	1957.99	-3.53638	9.39892302763864e-19	4.77651574764951e-17
Mcm3	FBgn0024332	178.018	1.98343	1.04233818907726e-18	5.27338988752004e-17
Atox1	FBgn0052446	1286.57	-1.34141	1.20605347999315e-18	6.07441757200121e-17
CG33346	FBgn0053346	2215.16	2.55152	1.43777867918829e-18	7.20934180382323e-17
CG32379	FBgn0052379	588.104	-4.43475	1.45055954332128e-18	7.24124458750032e-17
AdipoR	FBgn0038984	5531.24	-1.06503	1.77346206355087e-18	8.81418458192989e-17
CG13085	FBgn0032780	167.764	-2.06787	1.91209130258761e-18	9.46149740166376e-17
MFS12	FBgn0033234	780.273	-1.93883	2.00989986961129e-18	9.90204817858277e-17
CG43773	FBgn0264295	257.258	-2.74322	2.7319055733127e-18	1.34005907296147e-16
nbs	FBgn0261530	458.527	1.08978	3.72057422169391e-18	1.81712200732254e-16
upd3	FBgn0053542	321.134	3.0851	4.09703022878417e-18	1.99235754487685e-16
CG16749	FBgn0037678	13999.3	-2.53817	4.24808478677377e-18	2.05694817872883e-16
r-l	FBgn0003257	413.17	0.988376	4.51479447669879e-18	2.1767483455605e-16
CG5835	FBgn0038682	3267.88	-1.64859	5.54295878619086e-18	2.6610919585449e-16
CG3104	FBgn0031473	36.6028	-3.02472	6.0798777552672e-18	2.90649071334426e-16
Jon44E	FBgn0001285	7731.49	-3.08068	6.56203187435043e-18	3.11444696200716e-16
AstA-R1	FBgn0266429	26.8004	4.89699	6.57009729620372e-18	3.11444696200716e-16
ush	FBgn0003963	250.958	1.87731	7.15370808899301e-18	3.3769094000008e-16
CR43463	FBgn0266428	54.4393	3.33067	7.55038752591524e-18	3.54931133614066e-16
p53	FBgn0039044	527.27	1.62039	8.83437419422286e-18	4.13566015183495e-16
armi	FBgn0041164	301.701	1.02885	1.14033413826438e-17	5.31621890409037e-16
CG18622	FBgn0038460	505.59	-1.10602	1.32977790409199e-17	6.17389066418347e-16
tut	FBgn0052364	61.515	-2.58932	1.44442557797501e-17	6.67869236504676e-16
CG9510	FBgn0032076	2300.42	-1.35139	1.50788849095909e-17	6.94367263469404e-16
CG11576	FBgn0039882	1578.97	-1.65146	1.64248155425962e-17	7.53271418502318e-16
CG11898	FBgn0039645	1469.89	-1.67241	1.75394959850586e-17	8.01136006896484e-16
Def	FBgn0010385	317.067	3.63993	1.78125067375502e-17	8.1032540731065e-16
CG12490	FBgn0034782	302.398	-3.59634	1.95082918707399e-17	8.83905818818021e-16
CG12512	FBgn0031703	282.775	-2.20944	2.27756402766507e-17	1.02781909440469e-15
CG10336	FBgn0032698	47.9726	2.5746	2.46245698545188e-17	1.10683026732542e-15
CG12338	FBgn0033543	1149.46	-1.30951	2.69077885608229e-17	1.20465742279049e-15
RpS24	FBgn0261596	28325.2	-1.37637	2.72604639676049e-17	1.21562274499019e-15
CG15170	FBgn0032733	1282.11	-2.62926	3.1983795320311e-17	1.41771388488637e-15
CG5361	FBgn0037786	191.108	-2.74279	3.20437015286318e-17	1.41771388488637e-15
Jheh1	FBgn0010053	5200.62	-1.58426	3.83023360895442e-17	1.68799592094624e-15
Neto	FBgn0265416	31.1515	3.30747	3.92366515678887e-17	1.72244320229152e-15
alpha-Est1	FBgn0015568	1486.88	-2.69268	4.03133860824443e-17	1.76285124721758e-15
loco	FBgn0020278	1345.47	0.853055	4.09836546053586e-17	1.78524166508747e-15
CG7966	FBgn0038115	753.097	-2.62144	4.84388302011944e-17	2.10187262434568e-15
CR44690	FBgn0265901	553.655	-2.20565	5.33122481789103e-17	2.3044780994424e-15
asf1	FBgn0029094	595.255	1.45258	5.58768477552508e-17	2.40611678005626e-15
CG17109	FBgn0039051	2552.97	-1.86184	5.81167786228961e-17	2.49305511948104e-15
CG31792	FBgn0051792	56.095	-2.59296	5.93291452686515e-17	2.53542203379139e-15
rnh1	FBgn0023171	517.068	-1.1338	6.08797758561617e-17	2.59187030644987e-15
CG15254	FBgn0028949	289.507	-3.56807	6.19800456362951e-17	2.62879276266422e-15
CG42821	FBgn0262003	55.3087	4.41054	6.61452341445259e-17	2.7949458113054e-15
Mcm6	FBgn0025815	202.459	1.78017	7.50264621173707e-17	3.1583900955529e-15
CG31038	FBgn0051038	316.075	-1.30557	1.00554854141435e-16	4.21732291607312e-15
CG11407	FBgn0038733	68.0962	-2.61866	1.02788553685832e-16	4.29503875067983e-15
CG4670	FBgn0033814	2345.51	-1.23055	1.04294255558543e-16	4.34187376830804e-15
CG18417	FBgn0035780	316.558	-2.54937	1.06489969979331e-16	4.41698471068679e-15
CG10623	FBgn0032727	1581.74	-1.31545	1.0792452453671e-16	4.46008969165994e-15
DNApol-alpha73	FBgn0005696	60.1938	2.27708	1.13123069039966e-16	4.6578630106164e-15
Ser6	FBgn0011834	3349.64	-2.42497	1.15085752999864e-16	4.69634584647388e-15
aurB	FBgn0024227	53.8217	2.66743	1.15306488164622e-16	4.69634584647388e-15
CG31636	FBgn0051636	771.922	-2.49582	1.1453263849406e-16	4.69634584647388e-15
LManII	FBgn0027611	44034.5	-2.10282	1.1608451970822e-16	4.7110271631228e-15
CG8405	FBgn0034071	1093.7	-1.05576	1.19012137774313e-16	4.81252666082366e-15
CG43349	FBgn0263081	6039.3	-1.84067	1.24998358647712e-16	5.03654100808389e-15
CG6659	FBgn0030946	4186.18	-1.66312	1.37668276171035e-16	5.51309674038505e-15
Adi1	FBgn0052068	2238.71	-1.38246	1.37802985356194e-16	5.51309674038505e-15
CG6048	FBgn0029827	2499.64	-1.83628	1.50903731668306e-16	6.01588657484747e-15
CG43894	FBgn0264486	59.6604	2.909	1.55296533600586e-16	6.16920947916129e-15
Jon66Cii	FBgn0035887	1004.27	-3.41661	1.64565783984908e-16	6.51449535058852e-15
CG6933	FBgn0036952	388.982	3.6768	1.73698307300987e-16	6.85197308730678e-15
CIAPIN1	FBgn0001977	1323.7	0.896988	1.74510755304222e-16	6.86003603255133e-15
CG2082	FBgn0027608	70.2904	-2.54855	1.8106161505994e-16	7.09283729550779e-15
Gclm	FBgn0046114	3719.09	-1.61357	1.86034397950621e-16	7.26242241411388e-15
Irbp	FBgn0011774	404.519	1.22617	2.12307183845008e-16	8.25948154530821e-15
CG5084	FBgn0034288	68.8078	2.99288	2.21295723400677e-16	8.57958196359602e-15
CG32633	FBgn0052633	10720.2	-1.81079	2.4439894283664e-16	9.44283860644854e-15
CR44291	FBgn0265318	26.2283	4.38137	2.60936417487294e-16	1.00473879252275e-14
CG30411	FBgn0050411	587.035	-1.94441	2.76686875449376e-16	1.06176235674145e-14
Art4	FBgn0037770	335.461	0.934287	2.97976416880083e-16	1.1357330862301e-14
CG31267	FBgn0051267	2035.32	-2.23898	2.97239383630381e-16	1.1357330862301e-14
CG8132	FBgn0037687	779.362	-1.29838	3.19690530933804e-16	1.21439345791083e-14
Fen1	FBgn0025832	160.331	1.51818	3.88685412161589e-16	1.47152644966679e-14
Cyp6t1	FBgn0031182	1201.47	-2.11536	4.13769010394388e-16	1.56125149674565e-14
Uba2	FBgn0029113	1128.42	0.750066	4.34036022912259e-16	1.62684199684256e-14
KCNQ	FBgn0033494	2085.83	-1.74642	4.33915563408987e-16	1.62684199684256e-14
CG18765	FBgn0042110	346.818	2.44663	4.5029774450723e-16	1.68220501772535e-14
glob1	FBgn0027657	1003.17	-1.285	5.18753020586654e-16	1.93154177500285e-14
CR40190	FBgn0085732	107.783	1.96576	5.20581237468864e-16	1.9319728687907e-14
CG3568	FBgn0029710	36.0555	2.76734	5.66656779843815e-16	2.09607271809768e-14
sug	FBgn0033782	2118.18	-2.08341	5.68762837907916e-16	2.09698769192062e-14
CG13160	FBgn0033720	209.032	-2.42307	6.2053040588998e-16	2.28039870985367e-14
CG6950	FBgn0037955	1735.55	-1.00494	6.5118576105329e-16	2.38528498578027e-14
FucTC	FBgn0044872	431.877	-2.14317	6.70352465338097e-16	2.44754579739301e-14
DNApol-alpha60	FBgn0259676	65.52	2.42832	7.90414222640387e-16	2.87659782575124e-14
CG9705	FBgn0036661	1265.79	0.665579	8.48031418231544e-16	3.07636349211842e-14
CG1315	FBgn0026565	4280.27	-2.28176	8.63792134464997e-16	3.1234945067417e-14
CG7025	FBgn0031930	4077.53	-2.79627	8.71454917236068e-16	3.13495700207736e-14
CG6462	FBgn0035663	205.123	-2.2888	8.72519498894071e-16	3.13495700207736e-14
CG16854	FBgn0032338	18.7462	-4.35113	9.59771861885773e-16	3.43750671295089e-14
Hsp70Bb	FBgn0013278	1600.16	1.25239	1.09410360796955e-15	3.90622686870646e-14
DptA	FBgn0004240	341.088	3.24729	1.12656420686558e-15	4.00943135074367e-14
Jheh3	FBgn0034406	14608.8	-1.4004	1.1345386314783e-15	4.02511472966611e-14
Nup37	FBgn0039301	165.424	1.42215	1.30338091416996e-15	4.6096374525597e-14
CG9825	FBgn0034783	5426.51	-3.46479	1.34814648611032e-15	4.7530589550927e-14
bigmax	FBgn0039509	519.323	-1.13305	1.44679746726008e-15	5.08497477433902e-14
Hexo1	FBgn0041630	3467.37	-1.34986	1.51990557370728e-15	5.32533375234953e-14
CG13690	FBgn0031252	61.6234	2.87868	1.61319278180688e-15	5.63468760506044e-14
CG5641	FBgn0038046	447.473	0.876966	1.62099177955655e-15	5.64445347436944e-14
tim	FBgn0014396	9525.96	-1.46839	1.67728368337746e-15	5.82249677411217e-14
CG5107	FBgn0039342	50527.9	-3.06742	1.69236627136691e-15	5.85683321274893e-14
CG8468	FBgn0033913	2028.6	-2.07655	1.76896937041134e-15	6.10321481253235e-14
Mcm7	FBgn0020633	172.206	2.72874	1.96286252928471e-15	6.75152898030185e-14
CG9673	FBgn0030775	18307.1	-1.45912	2.9108419562129e-15	9.98179907294647e-14
CG13868	FBgn0034501	5206.31	-1.51687	2.93599623320307e-15	1.00375483342415e-13
CG7185	FBgn0035872	1310.95	0.716078	3.13415986245702e-15	1.06826560629124e-13
CG7556	FBgn0030990	1490.53	-0.65278	3.35405632909893e-15	1.13977299713536e-13
CG13255	FBgn0040636	1027.44	-2.18079	3.72427855001247e-15	1.26178109913636e-13
Spn55B	FBgn0028983	4542.35	-0.991063	3.85606477839701e-15	1.30242512780584e-13
CG15431	FBgn0031602	481.076	2.59652	3.86733219123344e-15	1.30242512780584e-13
CG32669	FBgn0052669	2300.48	-1.72855	3.95675300967834e-15	1.32857403140449e-13
D1	FBgn0000412	1422.13	0.735422	4.08770198768724e-15	1.36847043991357e-13
Glut1	FBgn0264574	205.842	-1.28994	4.34155637937749e-15	1.44915500213423e-13
CG16892	FBgn0030122	186.532	1.60805	4.38799465730436e-15	1.46033497710053e-13
CG9135	FBgn0031769	252.03	1.08546	4.40948369625669e-15	1.46317044297553e-13
htt	FBgn0027655	1314.64	-1.12	4.59227316483722e-15	1.51491303642379e-13
CG10445	FBgn0037531	76.9908	1.62311	4.5833137081174e-15	1.51491303642379e-13
CG42553	FBgn0260755	434.899	1.44342	5.15988873328846e-15	1.69719722125249e-13
CG10550	FBgn0039321	2297	-1.48898	6.64473375083254e-15	2.17924087723525e-13
rev7	FBgn0037345	297.537	2.27595	6.81658064131258e-15	2.229120660733e-13
CG13300	FBgn0035699	110.312	2.84041	7.03398223772979e-15	2.2935661157823e-13
CG2076	FBgn0030263	3877.02	0.934043	7.43013303395862e-15	2.39912769523619e-13
DNApol-epsilon58	FBgn0035644	48.0345	2.82035	7.42951306767074e-15	2.39912769523619e-13
Pop2	FBgn0036239	1326.22	0.646601	7.44278224900432e-15	2.39912769523619e-13
CG17475	FBgn0038481	5495.48	-2.68122	7.38029516378611e-15	2.39912769523619e-13
CdsA	FBgn0010350	1271.7	-1.00981	7.76114089039438e-15	2.49462084118033e-13
CG1665	FBgn0033451	697.97	-1.38686	7.87557371191886e-15	2.51141417844119e-13
CG31344	FBgn0051344	347.496	2.55388	7.87082986435404e-15	2.51141417844119e-13
AMPdeam	FBgn0052626	3687.51	-1.01865	7.8835992218028e-15	2.51141417844119e-13
Jon65Aiv	FBgn0250815	395322	-2.09862	7.90242894297663e-15	2.51141417844119e-13
Rif1	FBgn0050085	143.036	2.04646	7.93618390845375e-15	2.51505693413413e-13
Kaz-m1	FBgn0002578	5408.42	-0.931357	8.31281083006386e-15	2.62703450377536e-13
Gdh	FBgn0001098	6610.48	-1.33249	8.35620827038884e-15	2.63337267336667e-13
CG34456	FBgn0085485	50.4424	-1.82676	8.70868922040377e-15	2.73680868480767e-13
5-HT7	FBgn0004573	34.0487	-3.47232	9.13846166083296e-15	2.85595912624702e-13
Jupiter	FBgn0051363	715.627	1.30014	9.12938568387909e-15	2.85595912624702e-13
CG31886	FBgn0032079	427.639	-1.30962	9.28702223068191e-15	2.89436974603738e-13
CG12880	FBgn0046258	25.8497	4.13027	1.01612977747836e-14	3.15812015138041e-13
CR45195	FBgn0266705	27.0542	4.1645	1.0235204416503e-14	3.1723509952469e-13
Gr94a	FBgn0041225	28.364	3.31404	1.06056117245924e-14	3.27815099936579e-13
CG5359	FBgn0037773	58.8941	1.96979	1.07174132292809e-14	3.30365726920075e-13
CG5966	FBgn0029831	1301	-1.55722	1.08392197460461e-14	3.32304557540469e-13
RpS29	FBgn0261599	26410.4	-1.59244	1.08207852888521e-14	3.32304557540469e-13
CG31343	FBgn0051343	74320.3	-1.88389	1.14133780887823e-14	3.4895862221583e-13
CG13912	FBgn0035186	449.342	-2.19852	1.14990715437131e-14	3.50628446368031e-13
CG32751	FBgn0052751	161.249	-2.71727	1.18498047693717e-14	3.60349049617388e-13
fne	FBgn0086675	63.5378	3.88198	1.3604958312754e-14	4.12610590549707e-13
blanks	FBgn0035608	25.6784	4.11936	1.48053597876111e-14	4.47812517758253e-13
CR45133	FBgn0266626	276.611	-2.09587	1.56966237293086e-14	4.73500825973421e-13
epsilonTry	FBgn0010425	70604.7	-3.02911	1.60976995690707e-14	4.84304657435347e-13
dnk	FBgn0022338	244.364	1.65753	1.64261971543904e-14	4.9287328802083e-13
TrpA1	FBgn0035934	389.952	-1.68603	1.8262336367632e-14	5.46513737134283e-13
Ance	FBgn0012037	25383.7	-1.10451	1.93898294027735e-14	5.78719723074314e-13
CG17906	FBgn0032086	80.0817	2.01723	1.95182826595461e-14	5.81016530250658e-13
CG15445	FBgn0031161	839.986	1.01635	1.95780652949692e-14	5.81262454362744e-13
Mcm10	FBgn0032929	60.6119	3.1517	2.0091545799856e-14	5.94941784026183e-13
CG15414	FBgn0031542	28.0559	-2.43732	2.19188548594578e-14	6.47352147969642e-13
Cyp6a23	FBgn0033978	15302.8	1.62084	2.29196068937694e-14	6.75141005157979e-13
mre11	FBgn0020270	323.915	1.32128	2.33723944816753e-14	6.8668581912047e-13
Syx6	FBgn0037084	1466.15	0.869319	2.5440620345643e-14	7.45509295427386e-13
PGRP-SC2	FBgn0043575	14842.2	-2.16028	2.67500480460201e-14	7.81849849883933e-13
CG14907	FBgn0038455	1258.54	1.5317	2.73930832366199e-14	7.98575620350247e-13
Ef1alpha48D	FBgn0000556	150282	-1.2781	3.12733015979558e-14	9.09343785124065e-13
CG33282	FBgn0053282	52.5445	-3.2971	3.52043456172166e-14	1.02101652250241e-12
P58IPK	FBgn0037718	6036.04	-1.25036	3.60466308193954e-14	1.04276433052415e-12
bocks	FBgn0037719	653.894	0.883073	4.08852782864526e-14	1.17971281234721e-12
CG30495	FBgn0050495	758.488	-1.7359	5.04619129117152e-14	1.45232474864788e-12
CG2247	FBgn0030320	354.289	0.892313	5.08045289507308e-14	1.4584648743566e-12
fig	FBgn0039694	107.016	2.73298	5.25572449500629e-14	1.50495136428073e-12
Jon99Fi	FBgn0039778	55044.9	-2.48734	5.54182409696221e-14	1.58285720156779e-12
ntc	FBgn0035461	90.5349	1.78547	5.60807487505849e-14	1.59773486718207e-12
Lig4	FBgn0030506	374.25	1.14368	5.77314245010279e-14	1.63649731462462e-12
sima	FBgn0266411	2845.35	-1.38531	5.76282661160462e-14	1.63649731462462e-12
Dl	FBgn0000463	656.382	1.93127	5.8945396672638e-14	1.66672171744537e-12
CG15818	FBgn0031910	3016.68	-2.02309	6.87388773364189e-14	1.9387800352737e-12
SP1029	FBgn0263236	53.5136	-2.25471	7.55495819550623e-14	2.12556205390776e-12
CG8097	FBgn0030660	114.272	1.52397	8.05798621081257e-14	2.26144777190018e-12
CG17636	FBgn0025837	252.38	-3.36844	8.40715390920945e-14	2.3535858660968e-12
CG18063	FBgn0028856	16.9894	4.89423	9.0273039920396e-14	2.52094167421264e-12
Cyp9c1	FBgn0015040	1204.79	-1.02874	9.24609095690637e-14	2.57566415248933e-12
CG7639	FBgn0033989	854.843	0.740705	1.03125280797394e-13	2.86566359102512e-12
pst	FBgn0035770	35050	-0.631582	1.06403110657591e-13	2.94948377012026e-12
CG15695	FBgn0038832	625.322	-2.39954	1.07129498656271e-13	2.9623406956864e-12
phr	FBgn0003082	181.903	1.58121	1.13206103995861e-13	3.12271703002764e-12
CG10939	FBgn0010620	589.725	-1.24869	1.17206068318793e-13	3.22516795798199e-12
CG8768	FBgn0033769	217.064	-1.54993	1.20965409380784e-13	3.32051520348907e-12
CG3635	FBgn0032981	478.132	-2.7188	1.2216434149547e-13	3.34528665231042e-12
bab2	FBgn0025525	1108.99	-1.42179	1.27335381647045e-13	3.47844497758343e-12
CR32224	FBgn0052224	78.852	3.57693	1.40782189073813e-13	3.83648467905979e-12
CG16732	FBgn0039086	961.434	-0.86086	1.48024318542503e-13	4.02412135372654e-12
GLaz	FBgn0033799	207.121	-0.859744	1.59399904318127e-13	4.32295605893535e-12
alph	FBgn0086361	3699.06	0.634793	1.61342215591187e-13	4.36513879208578e-12
sfl	FBgn0020251	1385.67	0.889659	1.75251812736826e-13	4.73012189305472e-12
CG30339	FBgn0050339	1692.07	-1.60029	1.80051931853627e-13	4.84808089540005e-12
CG5664	FBgn0037082	190.558	1.41826	1.8250876228606e-13	4.90253299074125e-12
Phae2	FBgn0263235	6047.66	-1.50193	1.87719741184706e-13	5.03053235165285e-12
CG7179	FBgn0020880	85.4346	2.14872	1.92099683877392e-13	5.1357076623335e-12
Nxt1	FBgn0028411	467.084	1.90153	2.00847227058996e-13	5.35687568718581e-12
Bub3	FBgn0025457	437.758	0.712256	2.07061582023417e-13	5.50959615185893e-12
CycE	FBgn0010382	111.249	2.54022	2.19581970639385e-13	5.82899715942011e-12
CG9945	FBgn0034527	601.296	1.28586	2.24950135096524e-13	5.95748221633564e-12
sgll	FBgn0051472	1957.09	-0.639314	2.27293138266093e-13	6.00543603259499e-12
CG14079	FBgn0036849	22.0246	4.08678	2.34739973016952e-13	6.18770181209639e-12
l(3)72Dp	FBgn0263607	774.878	-1.40829	2.41791468631793e-13	6.35872109348225e-12
CG17571	FBgn0259998	31507.6	-2.9536	2.45616042435865e-13	6.44427951339866e-12
CG6654	FBgn0038301	222.159	1.21109	2.6205218205533e-13	6.85956547087757e-12
Btnd	FBgn0029848	248.917	-2.76699	2.8217806650141e-13	7.36928922747433e-12
alpha-Est3	FBgn0015571	1346.77	-0.755554	3.49185020458025e-13	9.09816489793864e-12
CG3091	FBgn0029608	2917.97	-1.19165	3.56732922505795e-13	9.27341205463222e-12
CR44192	FBgn0265081	496.31	-1.41979	3.59200829114168e-13	9.31610058405986e-12
CR45281	FBgn0266819	70.7031	-1.85713	3.698533217834e-13	9.57037884486311e-12
CG31937	FBgn0031360	1833.55	-0.723325	3.71997530568407e-13	9.60383556034959e-12
Peritrophin-15a	FBgn0040959	3958.65	-2.3788	3.76747820529831e-13	9.70426692058801e-12
rudhira	FBgn0266019	5438.26	1.37	3.98169062988579e-13	1.02326728214969e-11
CG31266	FBgn0051266	2360.64	-2.7812	4.03414413350706e-13	1.03439122986879e-11
Kat60	FBgn0040208	808.805	1.22325	4.30877403499874e-13	1.10230359779718e-11
CG13315	FBgn0040827	11941.5	-2.41653	4.76954582699884e-13	1.21742117692762e-11
wb	FBgn0261563	249.602	-0.979439	4.98307482827201e-13	1.26905305220237e-11
CDC45L	FBgn0026143	197.474	1.0592	5.03754809620106e-13	1.28003643291307e-11
PPP4R2r	FBgn0030208	814.683	0.777829	5.0978946544391e-13	1.29245949418836e-11
Nep1	FBgn0029843	992.818	-2.28344	5.23214559411028e-13	1.32352167248323e-11
Claspin	FBgn0052251	100.703	2.24088	5.4471932033882e-13	1.37483744341445e-11
Pde9	FBgn0259171	281.485	-2.10839	5.50479396927903e-13	1.38627423128138e-11
cue	FBgn0011204	2368.24	-0.946188	5.64542831541541e-13	1.41852388094692e-11
icln	FBgn0029079	123.462	1.41318	5.87855354270521e-13	1.47381869041778e-11
kek1	FBgn0015399	72.873	-3.26758	6.35382272685164e-13	1.58944186262395e-11
CG42240	FBgn0250869	2094.55	0.942337	6.42866006548268e-13	1.60460493050389e-11
CG5961	FBgn0038056	504.32	-1.55323	6.57821460941487e-13	1.63830943098054e-11
Set	FBgn0014879	661.444	0.755272	6.98577386541014e-13	1.73598019272152e-11
Mvl	FBgn0011672	2604.72	-1.12893	7.01913308159354e-13	1.74043647091293e-11
Pde6	FBgn0038237	309.393	-0.955649	7.26334376872657e-13	1.79704044734152e-11
RluA-1	FBgn0051719	940.153	-2.46974	7.43951966642865e-13	1.83660089445619e-11
WRNexo	FBgn0038608	124.467	2.81527	8.54362163210886e-13	2.10456635924568e-11
DNApol-alpha180	FBgn0259113	169.108	2.39651	8.95288501622834e-13	2.20057622555747e-11
Pdcd4	FBgn0030520	713.441	-1.19336	9.06176834878109e-13	2.22249718502061e-11
Ctf4	FBgn0033890	106.653	1.67016	9.55357496306848e-13	2.33803541720908e-11
CG3226	FBgn0029882	992.596	1.14167	9.77363002152746e-13	2.38671198923967e-11
CG33012	FBgn0053012	219.357	-2.68457	1.16294369193735e-12	2.83376473702746e-11
Jon66Ci	FBgn0035886	9891.28	-3.21146	1.20384703916246e-12	2.92711256375664e-11
RPA3	FBgn0266421	300.374	2.22281	1.25888572965966e-12	3.05435458107963e-11
Nup93-1	FBgn0027537	566.412	0.693483	1.31314690511314e-12	3.17916810804431e-11
gol	FBgn0004919	203.435	-1.49377	1.36494709916488e-12	3.29750175005957e-11
CG7402	FBgn0036768	219.097	-2.23119	1.40928906173615e-12	3.3973502552366e-11
RtcB	FBgn0032781	665.523	0.798616	1.45364947138354e-12	3.4968173424625e-11
RfC4	FBgn0260985	184.666	1.3276	1.58156461660161e-12	3.79642808606369e-11
CG2051	FBgn0037376	367.132	1.16929	1.63547532376462e-12	3.917501614164e-11
Acsl	FBgn0263120	18755.9	-1.37067	1.7126645706751e-12	4.09370374710943e-11
Cyp311a1	FBgn0030367	706.497	-2.63589	1.74192092481462e-12	4.15483126295106e-11
CG13077	FBgn0032810	156.22	-3.00726	1.81415950629693e-12	4.31800581224514e-11
Ercc1	FBgn0028434	73.7654	1.68496	1.88919290243992e-12	4.48713143691099e-11
rec	FBgn0003227	50.7065	-1.74265	1.96388609899922e-12	4.65474011951873e-11
CG8299	FBgn0034052	2669.71	-3.27683	2.02985002417558e-12	4.80099957499977e-11
CG9629	FBgn0036857	484.432	-1.90704	2.05509515714744e-12	4.85054049433837e-11
CG5612	FBgn0039529	55.1066	2.18554	2.23838929169416e-12	5.27213110415313e-11
CG42672	FBgn0261554	1766.86	-1.34612	2.2606670275886e-12	5.31350945942803e-11
CG9555	FBgn0032085	1901.77	-1.25721	2.40356330487312e-12	5.63763018826997e-11
CG13075	FBgn0036563	109.414	-2.3416	2.4249326023097e-12	5.67595220316556e-11
CG9394	FBgn0034588	5458.97	-3.1107	2.4740716107976e-12	5.7789805202937e-11
CG7084	FBgn0038938	1020.18	-2.48905	2.65888631853359e-12	6.19784203423471e-11
mag	FBgn0036996	19610.5	-3.07596	2.67314845137164e-12	6.21823934605666e-11
CG8398	FBgn0035708	802.809	1.6472	2.69228719827328e-12	6.24987328619734e-11
Oatp33Ea	FBgn0032433	5269.79	-1.34406	2.80551694693878e-12	6.49935158015675e-11
CG17047	FBgn0033827	104.895	1.22846	2.82240846725981e-12	6.52508449336581e-11
CG31463	FBgn0051463	2775.78	-2.43362	2.91539587864809e-12	6.72627736255783e-11
ZnT41F	FBgn0025693	1798.84	-0.965852	2.96041459148223e-12	6.81620355532705e-11
dmGlut	FBgn0010497	14230.2	-2.01792	3.03440411729975e-12	6.97233141575882e-11
ine	FBgn0011603	883.593	-1.3524	3.08539697702637e-12	7.07509119813241e-11
Cyp4ae1	FBgn0015036	2471.15	-1.33539	3.12495795972549e-12	7.1367967007334e-11
DNA-ligI	FBgn0262619	99.0075	1.28646	3.11908133303534e-12	7.1367967007334e-11
Acox57D-p	FBgn0034628	4113.76	-1.43693	3.22002938105945e-12	7.33906494487125e-11
Ttd14	FBgn0050118	2334.25	-1.07923	3.50355579827654e-12	7.96917671696692e-11
CG3348	FBgn0040609	2259.83	-1.90625	3.9704185437875e-12	9.01292998209468e-11
Nuf2	FBgn0031886	30.7693	2.50853	4.12812454257297e-12	9.35210865247153e-11
CG6293	FBgn0037807	121.384	-2.70513	4.3765898002193e-12	9.89512748017518e-11
Dyb	FBgn0033739	424.603	-0.926079	4.53451146368419e-12	1.0231671666657e-10
NaCP60E	FBgn0085434	275.579	-1.42027	4.54952616475037e-12	1.02450607167093e-10
hd	FBgn0086695	56.8746	2.25815	4.87539631615207e-12	1.09570161830334e-10
CG2003	FBgn0039886	299.076	-2.20544	4.93874370033277e-12	1.1077317381144e-10
CG31269	FBgn0051269	984.695	-2.7525	4.96564144965765e-12	1.11155489752059e-10
Jon74E	FBgn0023197	38309.4	-2.76115	5.39556601995129e-12	1.20540150172456e-10
CG8745	FBgn0036381	2400.68	-3.34859	5.52368743724893e-12	1.23158580369649e-10
MESK2	FBgn0043070	2877.57	0.791735	5.86256161246561e-12	1.30456449924728e-10
dome	FBgn0043903	1840.82	1.07958	6.17144564595332e-12	1.37059546806388e-10
Reg-2	FBgn0016715	544.345	-1.53969	6.39632663207353e-12	1.41774768296765e-10
CG9186	FBgn0035206	1502.49	-0.929821	6.45766843988768e-12	1.428537555663e-10
CG2120	FBgn0030005	366.405	-1.73556	6.52998541417639e-12	1.44170832568959e-10
pch2	FBgn0051453	119.314	2.30651	6.60071937947786e-12	1.45447882889198e-10
Syn1	FBgn0037130	170.311	-1.62232	6.84280066086916e-12	1.50488259368276e-10
esc	FBgn0000588	60.2845	1.51793	6.88184135479737e-12	1.51052401098879e-10
Art1	FBgn0037834	713.561	0.812005	7.44564877534516e-12	1.6311030967659e-10
Map205	FBgn0002645	1843.72	0.90132	7.70000881327532e-12	1.68355619053047e-10
Cas	FBgn0022213	1168.7	0.770063	8.01692242155893e-12	1.74945684255373e-10
AANATL2	FBgn0031791	310.116	-1.99496	8.3474091750044e-12	1.81805927244015e-10
RecQ4	FBgn0040290	74.9675	2.30242	9.42639321391566e-12	2.04910536106737e-10
CG31370	FBgn0051370	334.523	-1.22251	9.6547264440242e-12	2.09470430272079e-10
CG3739	FBgn0038702	2042.11	-1.64611	9.84989958043103e-12	2.13294754446109e-10
Prx2540-2	FBgn0033518	682.831	-1.88782	9.9936972226704e-12	2.15994046103769e-10
Arc2	FBgn0033928	830.847	1.53844	1.02091475320323e-11	2.20228685385063e-10
CG31731	FBgn0028539	2114.95	-1.02741	1.0596928364384e-11	2.28157530165992e-10
Inx2	FBgn0027108	2743.44	-0.793819	1.10413842408478e-11	2.372740895338e-10
CG6512	FBgn0036702	2995.69	0.573005	1.11664298431962e-11	2.39505059868707e-10
CG1077	FBgn0037405	40.3085	4.56234	1.14566810372911e-11	2.45264279815405e-10
CG31436	FBgn0051436	467.995	-1.30517	1.17998001779717e-11	2.52131336378554e-10
Pallidin	FBgn0036192	424.978	-1.10608	1.19943713820641e-11	2.55321694212164e-10
CG33258	FBgn0053258	2064.95	-1.84277	1.19897292767346e-11	2.55321694212164e-10
CG6841	FBgn0036828	680.617	0.849924	1.22987890756796e-11	2.61308735125832e-10
Cyp4ad1	FBgn0033292	2692	-2.58639	1.24635219463895e-11	2.64311004885652e-10
dgt2	FBgn0032390	164.554	2.03962	1.37069532605085e-11	2.9013479678247e-10
RpS16	FBgn0034743	39096.8	-1.36488	1.37618828020179e-11	2.90751988337764e-10
Cyp4ac1	FBgn0031693	1133.08	-2.57876	1.39545247075739e-11	2.94270930375419e-10
FBgn0000210	FBgn0000210	56.9794	2.20851	1.4817015737479e-11	3.11876066325071e-10
Slc45-1	FBgn0035968	82.1193	-2.49828	1.59118086605685e-11	3.34296136514962e-10
Roe1	FBgn0014877	1036.87	0.707023	1.60892553578137e-11	3.37395871648427e-10
Fas3	FBgn0000636	1126.68	0.713542	1.6243344579532e-11	3.39995201384565e-10
Zip48C	FBgn0033665	993.221	-1.40834	1.81654729380247e-11	3.79523825345915e-10
scra	FBgn0261385	196.085	1.96498	1.88784958159023e-11	3.93691663207042e-10
Wnt5	FBgn0010194	68.3015	2.61794	1.92164856572739e-11	4.00000721744214e-10
CG10425	FBgn0039304	2624.95	-0.957793	1.94522660287586e-11	4.03419973044953e-10
CR45542	FBgn0267102	13.0988	4.52859	1.94453044612855e-11	4.03419973044953e-10
CG12934	FBgn0033541	313.51	-2.96471	2.02572655677692e-11	4.19343981900133e-10
mgl	FBgn0261260	362.648	-1.07318	2.15778375647727e-11	4.45862936640597e-10
Krn	FBgn0052179	470.701	0.890236	2.23115532125752e-11	4.60180883627556e-10
CG2453	FBgn0030460	454.975	0.926544	2.27339142032845e-11	4.68036532922365e-10
CG5522	FBgn0034158	402.841	-0.756545	2.28665513478603e-11	4.69909712762403e-10
hth	FBgn0001235	1006.17	-0.899693	2.44840218878381e-11	5.02234063524708e-10
MRP	FBgn0032456	14312.2	1.29169	2.47088621891323e-11	5.05926285331744e-10
CR45192	FBgn0266702	537.562	-3.1365	2.48019607588607e-11	5.06912538553381e-10
CG32750	FBgn0052750	765.647	-2.41313	2.66689608502901e-11	5.44085382121108e-10
babos	FBgn0034724	306.075	1.96021	2.71975115205642e-11	5.53867012590262e-10
rut	FBgn0003301	407.253	-1.25039	2.74473961064604e-11	5.57948689861416e-10
Eaat1	FBgn0026439	2445.95	-2.59986	2.90974525031136e-11	5.90427084784403e-10
l(1)G0156	FBgn0027291	4906.62	-0.842549	3.00980486924967e-11	6.09634085006729e-10
fa2h	FBgn0050502	2487.98	-1.5096	3.23942004707147e-11	6.54966612384594e-10
CG42542	FBgn0260659	1440.99	-0.721339	3.52774334500658e-11	7.1198569621403e-10
CG15169	FBgn0032734	54.0025	-2.65695	3.58422277914576e-11	7.22092882041473e-10
CG18213	FBgn0038470	120.365	1.98992	3.61463894551828e-11	7.26922577243087e-10
Mipp1	FBgn0026061	6532.44	-2.36068	3.62545465764151e-11	7.2780034604113e-10
NAAT1	FBgn0029762	2718.06	-1.36934	3.64291977010928e-11	7.30007475068791e-10
CG17477	FBgn0038479	214.636	-2.76938	3.79015886427006e-11	7.58166175650617e-10
dre4	FBgn0002183	1214.44	0.851203	3.87903034082521e-11	7.74570270888318e-10
CG13324	FBgn0033789	3975.74	2.59811	4.05138234281781e-11	8.07556459216794e-10
Tom70	FBgn0032397	726.218	0.769519	4.25142655587278e-11	8.45170485631381e-10
CG10467	FBgn0035679	2264.62	-1.53578	4.25506856797221e-11	8.45170485631381e-10
CG2017	FBgn0037391	880.472	1.28031	4.26465955596795e-11	8.45586803346755e-10
CG12018	FBgn0027903	103.208	1.16876	4.3437575924273e-11	8.597591782064e-10
Gli	FBgn0001987	7477.37	1.1982	4.46233700643978e-11	8.81682768943144e-10
Pgam5	FBgn0023517	378.286	0.902012	4.48770555601321e-11	8.84988987191972e-10
CG31089	FBgn0051089	508.835	-4.32826	4.49475881635348e-11	8.84988987191972e-10
CG10477	FBgn0035661	9688	-1.10349	4.58169282688598e-11	9.00534119737414e-10
trsn	FBgn0033528	310.274	1.26914	4.59518058499909e-11	9.01614388868865e-10
CG1924	FBgn0030377	12.1598	4.1765	4.61415882843666e-11	9.03766317750389e-10
CR32218	FBgn0052218	152.541	-1.28867	5.11762980722638e-11	1.00064297201262e-09
osp	FBgn0003016	223.274	-1.04254	5.26264940120854e-11	1.02721817550925e-09
Phb2	FBgn0010551	5844.52	0.632764	5.38216707500576e-11	1.04873245147176e-09
Jon99Ci	FBgn0003358	59324.2	-2.55393	5.40034492700206e-11	1.04974548353088e-09
CG5455	FBgn0039430	2022.41	-1.31286	5.40597523427975e-11	1.04974548353088e-09
Drep2	FBgn0028408	43.2485	-2.32791	5.50118838716261e-11	1.06639875230187e-09
Ppat-Dpck	FBgn0035632	1984.55	-0.897509	5.51835883445188e-11	1.06789235626563e-09
Ahcy89E	FBgn0015011	711.663	-1.67975	5.53021004878604e-11	1.06835324949322e-09
CG11334	FBgn0039849	1197.64	-0.800242	5.72125407396088e-11	1.10337074294746e-09
CG9684	FBgn0037583	426.501	0.874572	5.85282708418216e-11	1.12681903009801e-09
CG4019	FBgn0034885	1487.58	-1.01717	5.94501624796513e-11	1.14261794394451e-09
CG3163	FBgn0034961	283.091	0.946832	6.05822111047217e-11	1.16239541782903e-09
Rbf	FBgn0015799	734.808	0.650828	6.16069340291485e-11	1.18004996556342e-09
dup	FBgn0000996	205.679	0.999127	6.20491800778175e-11	1.18650652481006e-09
CG13086	FBgn0032770	720.312	-0.899635	6.22528871670321e-11	1.18838760240009e-09
SelD	FBgn0261270	1169.08	0.682382	6.35276684137197e-11	1.21067424838444e-09
CG11710	FBgn0031115	607.742	0.717751	6.38490956145068e-11	1.21474788654783e-09
Ace	FBgn0000024	526.35	-1.54342	6.51012995540901e-11	1.23648629893812e-09
Sc2	FBgn0035471	1751.84	0.68106	6.64674040102041e-11	1.26031134797164e-09
CG7737	FBgn0033584	333.523	-1.33557	6.67828921665063e-11	1.26416877419887e-09
Hsc70-3	FBgn0001218	34632.7	-0.910234	6.94085931258683e-11	1.31167126908885e-09
Bin1	FBgn0024491	335.653	0.963326	7.34204263632492e-11	1.38516597028458e-09
Rab11	FBgn0015790	6015	-0.68123	7.70621523962716e-11	1.45144441291275e-09
Fic	FBgn0263278	677.362	-0.68442	7.94846471228019e-11	1.49457631473242e-09
CG3270	FBgn0033093	506.764	-2.31527	8.00090696759767e-11	1.50193398350145e-09
cactin	FBgn0031114	406.341	0.986335	8.12734921851192e-11	1.52313544656564e-09
ZnT63C	FBgn0035432	2644.68	-1.21837	8.18216972594254e-11	1.53086631588862e-09
CG9119	FBgn0035189	1215.94	-1.43757	8.29979519976048e-11	1.55030280535923e-09
CG12194	FBgn0031636	1595.81	-1.93114	8.66815290227629e-11	1.6164314222063e-09
CG8596	FBgn0035767	1329.36	-1.13503	8.72428264163444e-11	1.62421380796897e-09
CG18327	FBgn0033904	245.409	-2.56214	8.78378614676485e-11	1.63259761627349e-09
MRE23	FBgn0262741	95.7819	1.67487	8.82301432800562e-11	1.6371915731671e-09
CG2772	FBgn0031533	2761.63	-3.05152	9.15831342854997e-11	1.6938375754246e-09
CG10300	FBgn0039107	1256.19	-1.68714	9.15023605652319e-11	1.6938375754246e-09
CREG	FBgn0025456	1956.36	1.34017	1.01836200001586e-10	1.88038626582306e-09
CG7265	FBgn0038272	589.341	0.771408	1.02250914379928e-10	1.88495884972932e-09
shf	FBgn0003390	379.572	-0.96433	1.025874022013e-10	1.88807678896421e-09
hdly	FBgn0038842	549.262	1.34461	1.02775134168669e-10	1.8884512437963e-09
CG8773	FBgn0038135	38927.6	-1.75636	1.03474834327577e-10	1.89821639168085e-09
CG3961	FBgn0036821	621.116	-1.89468	1.10931297848636e-10	2.03169951676674e-09
St3	FBgn0265052	1585.27	-1.62344	1.13633600724482e-10	2.0778189357757e-09
garz	FBgn0264560	2674.92	-1.13291	1.13919830599669e-10	2.0796820854781e-09
RpL3	FBgn0020910	50200.3	-1.01243	1.15735830612614e-10	2.10942106780534e-09
CG14615	FBgn0031184	645.513	-1.84042	1.17142088822219e-10	2.12940286549571e-09
RapGAP1	FBgn0264895	342.146	-1.21111	1.17209641860737e-10	2.12940286549571e-09
CG31249	FBgn0051249	277.118	1.13415	1.17800722962208e-10	2.13670057308622e-09
CG6540	FBgn0030943	226.448	1.0766	1.30512019325523e-10	2.36346164049848e-09
CG14642	FBgn0037222	30.3733	-2.77802	1.31941629125336e-10	2.38552157017955e-09
CG2915	FBgn0033241	1539.65	-0.678404	1.34178570178229e-10	2.42208420600124e-09
T3dh	FBgn0017482	868.307	-0.68277	1.41481078506052e-10	2.54982352668575e-09
C3G	FBgn0259228	1843.82	-1.43603	1.41951878619457e-10	2.55422822102826e-09
Jon99Fii	FBgn0039777	79809.1	-2.14566	1.42361606106822e-10	2.55752171989995e-09
CR45142	FBgn0266635	363.248	-2.39934	1.43689506264471e-10	2.57727346530329e-09
Trp1	FBgn0011584	2776.61	-0.581097	1.44201221775936e-10	2.58234632393034e-09
CG6901	FBgn0038414	1081.77	-1.66458	1.47043472006316e-10	2.62907203038868e-09
CG8399	FBgn0034067	591.92	-1.92935	1.48987139553512e-10	2.65960903234608e-09
Prp19	FBgn0261119	718.822	0.644817	1.50513667321354e-10	2.68261484157901e-09
CG8839	FBgn0033717	5267.37	-0.791314	1.55571349422676e-10	2.76838480155619e-09
CG13643	FBgn0040601	19.3669	3.39025	1.60102300662694e-10	2.84452623004176e-09
stg	FBgn0003525	45.2277	2.67125	1.66925202102764e-10	2.96108511025689e-09
CG17664	FBgn0034883	3285.75	-1.22733	1.75251701941042e-10	3.10390847927604e-09
CG16723	FBgn0039092	178.697	-2.13816	1.78341794560551e-10	3.15368671823219e-09
CG42389	FBgn0259735	3120.34	-1.39134	1.80325522336909e-10	3.18377549766042e-09
Phf7	FBgn0031091	26.1461	2.30965	1.81081119109015e-10	3.1921206027936e-09
Tpc1	FBgn0037852	511.904	0.692792	1.86612491217371e-10	3.28449629627829e-09
CG10877	FBgn0038804	672.938	-1.10248	1.92091137404629e-10	3.37565765140035e-09
CG11384	FBgn0040363	138.538	-1.3957	1.95070070488998e-10	3.42267579355658e-09
Fs(2)Ket	FBgn0262743	2470.87	-0.835782	2.01596842757947e-10	3.52768851975262e-09
CR43264	FBgn0262945	127.577	3.506	2.01680472898461e-10	3.52768851975262e-09
gammaSnap1	FBgn0028552	972.034	0.786165	2.11288205591095e-10	3.69002095275346e-09
CG16965	FBgn0032387	2726.17	-1.53144	2.13249104940182e-10	3.7185106675968e-09
spheroide	FBgn0030774	10224.6	-1.2612	2.15071577093497e-10	3.74450236538400e-09
Pms2	FBgn0011660	71.01	2.1245	2.18297085343499e-10	3.79480387803599e-09
unc	FBgn0003950	31.0283	4.17573	2.22545123574186e-10	3.86269859102148e-09
CG5255	FBgn0038485	9.91676	-3.68704	2.25786204055824e-10	3.91293387735453e-09
ACXD	FBgn0040507	1653.44	-1.40692	2.2749610951568e-10	3.93652010361335e-09
alphaTub84D	FBgn0003885	1629.64	0.684643	2.3227940287224e-10	4.01313357305453e-09
not	FBgn0013717	263.331	-0.881801	2.43675506410475e-10	4.20358878183942e-09
Nup214	FBgn0010660	700.019	0.727797	2.45289338117108e-10	4.22496841624001e-09
GstE8	FBgn0063492	799.186	-1.41854	2.47580439105159e-10	4.25793066156159e-09
Sps2	FBgn0032224	591.042	-0.742778	2.56591431279446e-10	4.40618649573015e-09
CR40571	FBgn0085746	20.8249	3.02136	2.58205801925047e-10	4.42716999592459e-09
Diedel3	FBgn0085358	17023.3	-2.77754	2.63092329931356e-10	4.50410875005396e-09
c11.1	FBgn0040236	2761.53	1.09683	2.6474209301135e-10	4.52548529296069e-09
Cdc37	FBgn0011573	1393.17	0.593537	2.8400867115934e-10	4.84748234193597e-09
colt	FBgn0019830	3264.9	-1.04534	2.91886884870305e-10	4.97442271164167e-09
cutlet	FBgn0015376	66.3689	2.04253	3.15258455522402e-10	5.3646242763254e-09
RnrS	FBgn0011704	793.3	1.7597	3.19715143638929e-10	5.43226844959999e-09
CG11825	FBgn0033519	45.5402	-1.96335	3.37044711329093e-10	5.70951716698923e-09
stl	FBgn0086408	678.535	-2.28067	3.3700416105395e-10	5.70951716698923e-09
CG3397	FBgn0037975	557.054	2.22539	3.72265751440008e-10	6.29670495913968e-09
CG5282	FBgn0036986	7.0932	-4.32725	3.96243743158185e-10	6.6922483687285e-09
Catsup	FBgn0002022	2710.85	-1.06151	4.00530392327291e-10	6.75453495700522e-09
CG10559	FBgn0039323	390.303	2.21456	4.07057492620075e-10	6.85436213692491e-09
CG5674	FBgn0032656	395.564	1.37433	4.13955149667304e-10	6.96012220349706e-09
CG13298	FBgn0035692	940.805	0.546114	4.16078611209818e-10	6.98541501736484e-09
eIF-2beta	FBgn0004926	4725.45	0.584809	4.32053226616857e-10	7.24282987026952e-09
Dh31-R	FBgn0052843	550.127	-1.98857	4.42385422362183e-10	7.40503313811595e-09
Nha1	FBgn0031865	4050.15	-1.19206	4.65370652220149e-10	7.77823955310774e-09
wash	FBgn0033692	455.908	0.775179	4.66356618070713e-10	7.78318840987247e-09
CG5550	FBgn0034160	6932.3	-2.99788	4.74343905658503e-10	7.90479755338143e-09
CG4653	FBgn0030776	12454.8	-1.7395	4.78429565245012e-10	7.9611244175431e-09
CG12991	FBgn0030847	815.01	-1.01459	4.99940369122877e-10	8.30681479299603e-09
CG5160	FBgn0031906	133.674	-2.31766	5.29237426716485e-10	8.78067154149321e-09
Cyp12d1-p	FBgn0050489	79.2993	-3.23739	5.42326506930268e-10	8.98462210159659e-09
CG30456	FBgn0050456	3104.28	-1.58649	5.83313876604732e-10	9.64948263321788e-09
CG14629	FBgn0040398	6113.92	-1.13496	5.97179978560824e-10	9.86439900164454e-09
CG1246	FBgn0035360	7276.89	-0.750403	5.99041201420455e-10	9.88067665851693e-09
LKRSDH	FBgn0025687	298.576	-0.971487	6.29539751142917e-10	1.03685656531305e-08
Toll-9	FBgn0036978	324.935	-1.93527	6.35465542521919e-10	1.04509070710383e-08
CG7433	FBgn0036927	561.259	-1.58442	6.5355898885533e-10	1.07328275287712e-08
CG14526	FBgn0027578	79.289	2.61317	6.57141628646704e-10	1.07759765325467e-08
312	FBgn0029514	269.489	0.856621	6.60974793226781e-10	1.08231024922853e-08
CR43952	FBgn0264603	77.1717	-1.16282	6.63636323538798e-10	1.0850934785746e-08
CG18744	FBgn0042101	1181.41	-2.36339	6.81579387711641e-10	1.11281890769359e-08
Rok	FBgn0026181	2526.13	0.54602	6.8667754628648e-10	1.11952255450926e-08
CG13488	FBgn0034670	455.894	1.91501	6.93082658468253e-10	1.12833456750921e-08
CG18598	FBgn0038589	17.5917	3.27349	7.05944074169837e-10	1.14761686524267e-08
CG10168	FBgn0039087	204.985	-1.15367	7.09272116276691e-10	1.15136805983218e-08
Top2	FBgn0003732	767.865	0.815333	7.87873587099359e-10	1.27712497265158e-08
Rrp1	FBgn0004584	175.817	1.81679	7.9519061421553e-10	1.28713637153223e-08
CG6296	FBgn0039470	2049.87	-2.89352	8.10309598974998e-10	1.30972964120859e-08
HPS4	FBgn0034261	384.072	-0.901819	8.18360547187388e-10	1.32085031378657e-08
pic	FBgn0260962	1204.25	0.784618	8.48145337041561e-10	1.36696795607184e-08
piwi	FBgn0004872	25.357	3.37469	8.59562363793758e-10	1.38339266595167e-08
CG15544	FBgn0039804	46.0404	-2.73061	8.6208145679771e-10	1.38349971487792e-08
CG32276	FBgn0047135	5348.53	-0.828599	8.61386798507135e-10	1.38349971487792e-08
CG33158	FBgn0053158	665.247	1.1091	8.6769058274705e-10	1.39052345945344e-08
GC1	FBgn0260743	1717.82	-0.892657	8.69825508782921e-10	1.39196757306226e-08
Klp67A	FBgn0004379	25.7553	2.06012	8.74407405153948e-10	1.39731789588482e-08
uex	FBgn0262124	4602.92	0.688647	8.92129643660536e-10	1.42362187267018e-08
CG10592	FBgn0035619	12040.7	-2.38446	9.16124397118272e-10	1.45984681472999e-08
CycB	FBgn0000405	92.1836	1.96153	9.30869075522677e-10	1.48125033992198e-08
CR44587	FBgn0265798	49.6524	-2.26627	9.57787595837964e-10	1.52193797975266e-08
CG10650	FBgn0046302	15677.7	-0.973586	9.60134194625095e-10	1.52352095411538e-08
CG18869	FBgn0042179	1058.83	-0.975739	1.01685279039394e-09	1.61125466028433e-08
Gs2	FBgn0001145	7760.15	-1.74813	1.05056987369855e-09	1.66147634992968e-08
VhaPPA1-1	FBgn0028662	10358.2	-0.495289	1.05149274406115e-09	1.66147634992968e-08
CG7290	FBgn0036949	26.5329	3.32052	1.07291871373394e-09	1.6929606892792e-08
CR43423	FBgn0263342	214.28	0.974461	1.13114661059832e-09	1.78234581854333e-08
PKD	FBgn0038603	148.599	-1.38098	1.17463025284773e-09	1.84828152198439e-08
PGRP-SC1b	FBgn0033327	1366.94	-2.20436	1.18069399155837e-09	1.85523532211164e-08
FKBP59	FBgn0029174	2241.46	0.809573	1.18912574111518e-09	1.86588548139938e-08
CG17834	FBgn0028394	1097.91	-0.626193	1.19151258773763e-09	1.86679699127717e-08
CG6962	FBgn0037958	236.015	0.838216	1.19301598183907e-09	1.86679699127717e-08
CG9498	FBgn0031801	2153.4	-1.77846	1.22298500292615e-09	1.91104110845052e-08
DNApol-alpha50	FBgn0011762	57.1527	1.4925	1.24021717999698e-09	1.93528772126224e-08
GM130	FBgn0034697	896.884	-0.939244	1.25318180009944e-09	1.95281727468535e-08
eIF3-S8	FBgn0034258	8189.73	-0.922598	1.26045016427985e-09	1.96143431081452e-08
RpL7	FBgn0005593	32588.7	-0.956826	1.26550023857639e-09	1.9665803982946e-08
Ubi-p63E	FBgn0003943	4366.54	0.943368	1.27144260231447e-09	1.97309703429323e-08
CG11655	FBgn0030638	746.185	-0.675501	1.28321243332314e-09	1.98862674076259e-08
toc	FBgn0015600	375.085	-0.675103	1.29019659962028e-09	1.99670754964554e-08
Drak	FBgn0052666	1113.96	-0.840545	1.3236501116011e-09	2.04567404918953e-08
RpS20	FBgn0019936	23056.9	-1.0138	1.33666888101298e-09	2.06296830582606e-08
Rack1	FBgn0020618	42448.2	-0.901937	1.4417697792101e-09	2.22213752036179e-08
Sh3beta	FBgn0035772	3341.49	0.798016	1.45733564998746e-09	2.24306422962599e-08
Ndc1	FBgn0039125	314.397	0.808414	1.46244626254398e-09	2.2478635877413e-08
CG10725	FBgn0036362	291.289	-3.22655	1.47799715338619e-09	2.26867535843578e-08
CG34301	FBgn0085330	932.535	-1.74119	1.50091130861806e-09	2.30071757932459e-08
CG5254	FBgn0040383	2050.73	-1.99588	1.51701527420811e-09	2.32224780510393e-08
Caf1-105	FBgn0033526	72.7897	1.25631	1.55214261248498e-09	2.37280121328666e-08
lambdaTry	FBgn0043470	7528.25	-1.56433	1.55586311683492e-09	2.37527032261591e-08
CG8774	FBgn0038136	9768.84	-1.56015	1.59310301798338e-09	2.4288362498498e-08
CkIIbeta	FBgn0000259	1907.42	0.409649	1.6141477690078e-09	2.4575998825838e-08
CG2990	FBgn0030170	27.9695	2.6054	1.61858383107343e-09	2.46103271996906e-08
CG34026	FBgn0054026	2751.67	-1.7104	1.62412402589475e-09	2.46613287485122e-08
PGRP-SC1a	FBgn0043576	1806.13	-2.68855	1.66471323195476e-09	2.52436756490775e-08
CG3812	FBgn0030421	126.969	2.32185	1.66705313746365e-09	2.52452261702884e-08
Ndae1	FBgn0259111	3638.1	-1.26844	1.66965295876573e-09	2.52507033254624e-08
Desat1	FBgn0086687	8413.82	-0.992411	1.73387362899701e-09	2.6186830364584e-08
Clp	FBgn0015621	193.575	0.955862	1.78508742013506e-09	2.69242730935345e-08
wls	FBgn0036141	631.931	0.759295	1.81087938116743e-09	2.72768240031121e-08
CG34236	FBgn0085265	2044.47	1.62516	1.82929282036526e-09	2.75174421324812e-08
tum	FBgn0086356	50.3752	2.35836	1.84068897201032e-09	2.76520013078833e-08
CG10265	FBgn0033990	47.6603	1.46376	1.9063745967504e-09	2.86006890964601e-08
CG12746	FBgn0037341	1182.9	-0.539803	1.91254492066305e-09	2.86551551061362e-08
Edem2	FBgn0032480	2880.88	-1.18571	1.93855535115495e-09	2.90063414744432e-08
Snx3	FBgn0038065	746.522	0.714448	1.96220906945777e-09	2.93213810882418e-08
Bace	FBgn0032049	190812	-2.56341	1.98163697137038e-09	2.95725242209003e-08
Ran	FBgn0020255	7240.88	0.658912	1.98808553131855e-09	2.95979302656164e-08
CG18788	FBgn0042126	96.5648	-1.94342	1.98858634473828e-09	2.95979302656164e-08
tex	FBgn0037569	127.893	0.883446	2.00838301567014e-09	2.98531978692892e-08
Uba1	FBgn0023143	6810.07	0.782686	2.01703503100491e-09	2.99423542365756e-08
CG8032	FBgn0037606	529.504	-0.810198	2.02904960622042e-09	3.00811270136384e-08
APP-BP1	FBgn0261112	416.905	0.641116	2.06942892790448e-09	3.06394975913627e-08
polo	FBgn0003124	112.335	2.33852	2.08163825321693e-09	3.07798725724685e-08
HDAC1	FBgn0015805	836.018	0.7826	2.13397919445026e-09	3.15125042824448e-08
Vha68-2	FBgn0263598	39014.2	-0.45958	2.17623497877538e-09	3.20944876216259e-08
CG34423	FBgn0085452	218.291	1.34037	2.22213833863488e-09	3.27286745907033e-08
AMPKalpha	FBgn0023169	2949.5	-0.726762	2.26090899749736e-09	3.32562911470212e-08
Ate1	FBgn0025720	800.477	0.488119	2.30061783117292e-09	3.3796315587621e-08
tilB	FBgn0014395	114.4	-1.98392	2.31174718657975e-09	3.39156459804848e-08
List	FBgn0034381	49.6062	-2.17766	2.39572952161685e-09	3.51021044972484e-08
qkr54B	FBgn0022987	302.451	0.862069	2.40263598745062e-09	3.51576384052113e-08
sowah	FBgn0036302	1643.1	1.00015	2.43601928086161e-09	3.55999605267884e-08
Cks30A	FBgn0010314	17.576	3.00945	2.47231989067624e-09	3.60837166967779e-08
Cdc6	FBgn0035918	66.4574	1.59057	2.47887272933461e-09	3.61326125740995e-08
CG12643	FBgn0040942	740.825	-1.56173	2.49239822066208e-09	3.62828860974318e-08
CG17209	FBgn0030687	991.844	-0.5431	2.49581081548819e-09	3.62857443561054e-08
FBgn0033162	FBgn0033162	3117.91	-0.625181	2.53817464588808e-09	3.68081126613761e-08
Ime4	FBgn0039139	143.61	0.835087	2.53826552477846e-09	3.68081126613761e-08
CG42784	FBgn0263354	26.5215	-1.92157	2.56108837729586e-09	3.70913980393477e-08
Vha100-5	FBgn0032373	17042.8	-0.790296	2.56819752382931e-09	3.71466723895413e-08
pinta	FBgn0038966	714.497	-0.980107	2.58137949415992e-09	3.7289530669798e-08
Ts	FBgn0024920	77.0383	2.10283	2.60392113484596e-09	3.75397953016383e-08
CG6005	FBgn0038672	332.902	1.10594	2.60535895419099e-09	3.75397953016383e-08
SmD2	FBgn0261789	780.573	0.665442	2.61068763770246e-09	3.75685942966316e-08
CG42445	FBgn0259916	204.783	-0.94822	2.63749156483019e-09	3.79059615725021e-08
CAH1	FBgn0027844	7315.28	-1.2803	2.71306922253343e-09	3.88930711164195e-08
RpL37A	FBgn0261608	17475.5	-0.98005	2.71084623135065e-09	3.88930711164195e-08
CG33301	FBgn0053301	2203.06	-0.896053	2.80471762235885e-09	4.01558682937215e-08
rpr	FBgn0011706	10.9768	-3.51784	2.85253319148686e-09	4.0788693873707e-08
CG14528	FBgn0039611	39.2303	2.66194	2.88219010851685e-09	4.11605934231482e-08
ebd1	FBgn0035153	261.877	0.928743	2.99203058786697e-09	4.26752074491975e-08
CG18404	FBgn0039761	12774.8	-1.84903	3.00733514105427e-09	4.28393371987049e-08
Cyp313b1	FBgn0037601	99.5051	-1.90209	3.05045187025695e-09	4.33987364441852e-08
CG8312	FBgn0037720	803.329	-2.0141	3.06569309245693e-09	4.35606416487394e-08
Ppcs	FBgn0261285	736.868	-0.851108	3.116259592893e-09	4.42234474553697e-08
CG1806	FBgn0030360	86.454	-1.6997	3.13584157313066e-09	4.44454329498243e-08
bcn92	FBgn0013432	231.639	1.01181	3.20159962834022e-09	4.53205106736943e-08
alpha-Est7	FBgn0015575	1793.45	-2.47612	3.25049624001551e-09	4.5955010751698e-08
Nup58	FBgn0038722	183.166	0.823191	3.27141713854681e-09	4.61929013230101e-08
Acox57D-d	FBgn0034629	2916.63	-1.19418	3.4089934303232e-09	4.80753298511329e-08
tai	FBgn0041092	2083.72	-0.80818	3.55834294390425e-09	5.0118882762956e-08
cu	FBgn0261808	1198.3	-1.22825	3.74276863113599e-09	5.26507677013419e-08
Cyp313a4	FBgn0038076	66.1032	-1.21434	3.82186397570266e-09	5.36964749363355e-08
CG18259	FBgn0030956	146.517	0.875079	3.83151265198242e-09	5.37650817657533e-08
CG17765	FBgn0033529	894.635	0.814851	3.93087912577612e-09	5.50909047167779e-08
CG12374	FBgn0033774	797133	-2.7729	4.0870143687885e-09	5.72080596881785e-08
Cyt-c-p	FBgn0000409	9665.99	-0.807074	4.19428433642775e-09	5.86368226562304e-08
CR45392	FBgn0266941	27.5914	2.0985	4.31434297074008e-09	6.02406155889722e-08
jub	FBgn0030530	379.276	0.794797	4.35377436267381e-09	6.07160474161754e-08
hay	FBgn0001179	392.922	0.770259	4.36000434234269e-09	6.07278629510003e-08
CG6403	FBgn0039453	428.044	-3.02143	4.45513640448269e-09	6.19763858389318e-08
CG18607	FBgn0034429	78.3295	-2.8937	4.62908953784318e-09	6.43169804999344e-08
CG10863	FBgn0027552	2631.4	-0.837294	4.79898252776903e-09	6.65954746350433e-08
ppk13	FBgn0053508	33.7618	2.91139	5.27630292648556e-09	7.31292992833048e-08
CG3408	FBgn0036008	173.024	1.06037	5.37083302361673e-09	7.43481449968638e-08
Grip71	FBgn0032705	38.3092	1.86283	5.54603349140633e-09	7.66793503064292e-08
CG9436	FBgn0033101	1632.43	-0.862792	5.72273151248098e-09	7.90255286705146e-08
CG5916	FBgn0038401	363.89	0.620871	5.80786292290265e-09	8.01030678437502e-08
Ilp3	FBgn0044050	59.43	2.95908	5.91452932573293e-09	8.14746274150415e-08
Taf7	FBgn0024909	201.239	0.9212	5.97611726888606e-09	8.22226280824055e-08
Usp1	FBgn0028476	2439.9	-1.58212	6.23063915933584e-09	8.56200621140402e-08
HmgD	FBgn0004362	621.467	1.54659	6.38040404523936e-09	8.7571433623346e-08
CG15673	FBgn0034639	314.599	-0.643934	6.63114062641336e-09	9.0902221807042e-08
CG4729	FBgn0036623	5664.04	-1.07526	6.66354515601858e-09	9.1235578216264e-08
rempA	FBgn0260933	254.837	2.1896	6.69323621701719e-09	9.15310193944097e-08
CG10226	FBgn0035695	266.884	-1.6857	6.78156778560151e-09	9.26266921999471e-08
CG10654	FBgn0036294	21.771	-2.37705	6.96742352401697e-09	9.50501477605313e-08
Pld	FBgn0033075	2758.59	-0.724647	7.01883292202848e-09	9.55204740968943e-08
bun	FBgn0259176	6831.25	-0.721101	7.01754780366953e-09	9.55204740968943e-08
CG31454	FBgn0051454	397.02	-1.26567	7.11161411071197e-09	9.66665426470512e-08
Oscillin	FBgn0031717	1034.63	0.895672	7.1404056701835e-09	9.69411032142122e-08
Mpcp	FBgn0026409	26849.3	-0.67654	7.29028131265089e-09	9.88569155881339e-08
DNApol-delta	FBgn0263600	123.98	1.01886	7.31321942409777e-09	9.90489094149713e-08
CG31373	FBgn0051373	323.132	-2.12845	7.33797095800081e-09	9.91884280093854e-08
SmD1	FBgn0261933	273.636	0.920437	7.34110418257727e-09	9.91884280093854e-08
CG18748	FBgn0042105	2950.84	-1.51533	7.45305235281935e-09	1.00580546225488e-07
spel1	FBgn0015546	116.182	1.08725	7.61701351301763e-09	1.02425681113069e-07
Surf4	FBgn0019925	3924.08	-0.824148	7.61384612108093e-09	1.02425681113069e-07
bves	FBgn0031150	421.443	-0.720486	7.6145716938514e-09	1.02425681113069e-07
Xpac	FBgn0004832	102.37	1.232	7.77772166654672e-09	1.04462209335691e-07
Galphaf	FBgn0010223	1433.98	-1.35934	7.90431651887118e-09	1.06036265119982e-07
Cyp4d2	FBgn0011576	381.088	-1.41512	8.0460974775199e-09	1.0781006145057e-07
CG7841	FBgn0036502	505.384	0.77122	8.30418006046467e-09	1.11136132197108e-07
x16	FBgn0028554	329.619	0.864889	8.70397719051266e-09	1.16348661923417e-07
CG30291	FBgn0050291	1167.33	-0.462298	8.78183000625617e-09	1.1725042145631e-07
Argk	FBgn0000116	41567.6	-1.01505	8.79856854154275e-09	1.17335047619013e-07
CG7593	FBgn0039687	71.601	1.48497	8.87851642082881e-09	1.18261419433047e-07
CG11454	FBgn0031224	548.763	0.852483	8.9173482274322e-09	1.18638588091852e-07
CG15279	FBgn0028886	498.685	-1.6639	8.96793719026637e-09	1.19108089199603e-07
CG5112	FBgn0039341	1315.36	-0.841212	8.97375251016334e-09	1.19108089199603e-07
Sld5	FBgn0039403	62.6857	1.32573	9.03947562474925e-09	1.19839440656194e-07
CG42335	FBgn0259237	6159.11	1.17267	9.1437727479414e-09	1.21079864016755e-07
RpII33	FBgn0026373	285.095	0.666635	9.16500846156672e-09	1.21218787178659e-07
sub	FBgn0003545	26.6087	2.64208	9.56436410786131e-09	1.26352641527976e-07
CG11594	FBgn0035484	636.465	-1.37378	9.893406254545e-09	1.30546677618452e-07
CG4991	FBgn0030817	512.697	-2.63996	9.96468822847602e-09	1.3133365957204e-07
CG31469	FBgn0051469	473.146	1.81617	9.99612701440681e-09	1.31594288187325e-07
Gk1	FBgn0025592	2319.75	-0.819397	1.02057333708109e-08	1.34197067470266e-07
CG7900	FBgn0037548	862.583	-1.30207	1.04081694679854e-08	1.36699613431677e-07
Efr	FBgn0029849	1664.27	-1.18249	1.0452458528555e-08	1.37121671068788e-07
Cyp6a21	FBgn0033981	950.475	-1.00847	1.04999827569078e-08	1.37585139911073e-07
elm	FBgn0037358	5381.96	-1.27922	1.08459400498785e-08	1.41953475223583e-07
CG5010	FBgn0260747	4783.23	0.643641	1.08970987499537e-08	1.42457784585143e-07
CG44013	FBgn0264775	2340.1	2.13552	1.10638017475175e-08	1.4446968902256e-07
Naam	FBgn0051216	185.023	1.15879	1.11507986704084e-08	1.45358315939506e-07
Psa	FBgn0261243	4353.22	1.07394	1.11576229040606e-08	1.45358315939506e-07
CG7766	FBgn0030087	1945.73	-0.675327	1.14916042048176e-08	1.49536653562574e-07
CG4080	FBgn0035983	1443.14	0.981584	1.15542509696645e-08	1.50178639907552e-07
CG17036	FBgn0032449	704.513	-1.38736	1.16693171597983e-08	1.5149969642905e-07
CG17598	FBgn0031194	1028.65	-0.658352	1.21474564427716e-08	1.57525981134885e-07
regucalcin	FBgn0030362	672.79	-1.3314	1.27605523829423e-08	1.65286512037147e-07
tsl	FBgn0003867	81.2823	1.53158	1.30005487012927e-08	1.68202053266036e-07
CG2004	FBgn0030060	2330.94	-1.18154	1.30387915308283e-08	1.68503603723717e-07
CG16952	FBgn0030701	387.854	0.629394	1.32483639809583e-08	1.71016066857175e-07
CG6424	FBgn0028494	2423.23	-1.04771	1.32823667305969e-08	1.71259041662394e-07
CG6574	FBgn0037846	611.661	-1.60284	1.34228649932973e-08	1.72873016957056e-07
CG3940	FBgn0037788	1475.27	-1.78365	1.35254245961382e-08	1.73995256891255e-07
unk	FBgn0004395	535.443	0.807168	1.41277352204392e-08	1.81536570338264e-07
Ubi-p5E	FBgn0086558	7313.86	-0.682905	1.44101805202914e-08	1.84955240762148e-07
VhaSFD	FBgn0027779	13729	-0.470578	1.45335654638164e-08	1.86326915412246e-07
Zip42C.1	FBgn0033096	120.05	-2.53246	1.46888522183258e-08	1.88104007635813e-07
Fmr1	FBgn0028734	1191.17	0.522509	1.47613049842654e-08	1.88817508880366e-07
Atac1	FBgn0031876	168.146	0.883521	1.54426289770203e-08	1.97308878956674e-07
CG9578	FBgn0031094	339.295	0.623141	1.58061427637651e-08	2.01725003009952e-07
CG5144	FBgn0035957	36.74	-1.94947	1.59837837024922e-08	2.03761635854821e-07
lark	FBgn0011640	1426.39	0.510777	1.61253415198528e-08	2.05102709162322e-07
RpL15	FBgn0028697	35401.4	-0.871642	1.61146247314998e-08	2.05102709162322e-07
CG5157	FBgn0036575	320.061	-2.51852	1.61694001360688e-08	2.05431500377396e-07
Slbp	FBgn0041186	193.235	0.783852	1.631287411606e-08	2.07021198849707e-07
Ugt86Di	FBgn0040251	182.177	1.70725	1.65650214862032e-08	2.0998491281724e-07
CG32795	FBgn0040384	4546.24	-0.819055	1.69903124200558e-08	2.15134348735207e-07
RpL35	FBgn0029785	26444.6	-0.968657	1.72141902950192e-08	2.17724770076689e-07
Rbbp5	FBgn0036973	215.282	0.739768	1.73497219600934e-08	2.19193239813856e-07
CG14971	FBgn0035449	1053.35	-0.708473	1.75969849722176e-08	2.2206843898944e-07
Cyp6d5	FBgn0038194	14581.8	-1.22476	1.76502775052814e-08	2.2249210146881e-07
d4	FBgn0033015	580.185	0.51115	1.76748781773578e-08	2.22553544193025e-07
CG10089	FBgn0036369	32.9805	2.46331	1.8258089732828e-08	2.2964076740888e-07
Pfrx	FBgn0027621	1358.84	-0.796137	1.87101656325732e-08	2.35064686711237e-07
nudC	FBgn0021768	834.656	0.984921	1.88267636613995e-08	2.36266460097786e-07
CR40639	FBgn0085758	52.7721	-1.86533	1.88970714890818e-08	2.3688528948869e-07
Tmhs	FBgn0262624	39.1602	-2.58229	1.90987723183216e-08	2.3914800143763e-07
pont	FBgn0040078	738.589	0.630831	1.94946343552925e-08	2.43834218177838e-07
mud	FBgn0002873	54.5235	1.98571	1.9670361289878e-08	2.45759707721377e-07
Sdic2	FBgn0053497	5.46106	-3.97785	1.98053610224736e-08	2.47172658247287e-07
CG9008	FBgn0028540	539.92	-1.38783	1.98762200904334e-08	2.47782889569358e-07
Nmt	FBgn0020392	1370.16	0.591018	2.03299353206463e-08	2.53159304953125e-07
CR43270	FBgn0262951	200.033	1.11024	2.07835856743767e-08	2.58523057969479e-07
CG13631	FBgn0040600	183.412	-0.855777	2.13122066614072e-08	2.64806514927309e-07
NijA	FBgn0036101	85.8677	-1.67965	2.14469725297304e-08	2.65895323165295e-07
comm3	FBgn0259236	419.078	-1.32574	2.14306735285843e-08	2.65895323165295e-07
CG6272	FBgn0036126	257.866	1.1168	2.17871198596914e-08	2.69815901489614e-07
lili	FBgn0027539	443.051	-0.852033	2.19934562191235e-08	2.72072558184377e-07
Jon25Biii	FBgn0031653	126391	-2.24646	2.29544851057558e-08	2.83650055819427e-07
Nup133	FBgn0039004	366.739	0.624738	2.36062779104602e-08	2.91385150312705e-07
Psf3	FBgn0030196	107.306	1.07639	2.37770853848389e-08	2.93172762089347e-07
CG10924	FBgn0034356	783.06	-1.62827	2.40547758042409e-08	2.96272904610749e-07
CG9706	FBgn0036662	1246.77	-0.948981	2.43755754015832e-08	2.99710869627883e-07
Kaz1-ORFB	FBgn0063923	89.6768	2.23732	2.4387039382946e-08	2.99710869627883e-07
Mondo	FBgn0032940	1605.72	-0.872371	2.506256330337e-08	3.076777357874e-07
CG42867	FBgn0262141	13.3388	3.05347	2.55162611561039e-08	3.12907019959961e-07
Kal1	FBgn0039155	15.8063	-2.38371	2.61610339104469e-08	3.20465564145127e-07
CG8728	FBgn0033235	1276.99	0.55982	2.62370078359273e-08	3.21047638183223e-07
CG43348	FBgn0263080	362.508	-2.01045	2.64810532144413e-08	3.23682819464059e-07
LManI	FBgn0032253	8494.31	-1.07946	2.69176411364465e-08	3.28663233010162e-07
FBgn0013984	FBgn0013984	1742.14	1.4859	2.90758093830192e-08	3.54630574550511e-07
14-3-3epsilon	FBgn0020238	13015.2	0.649988	2.9254442461629e-08	3.56423995520624e-07
RnpS1	FBgn0037707	361.682	0.75517	2.97374871212794e-08	3.61918370768365e-07
CG5644	FBgn0035948	17.9175	2.51406	3.02894838405985e-08	3.68239177467276e-07
HP4	FBgn0035829	234.134	0.934474	3.06488663587196e-08	3.72207223099111e-07
CG6040	FBgn0038679	116.296	-1.17464	3.11852802407653e-08	3.78314335135821e-07
CG4658	FBgn0032170	2363.61	-0.45679	3.25268278700463e-08	3.94165061256566e-07
28SrRNA-Psi:CR45851	FBgn0267511	823.627	-1.66665	3.35893685834583e-08	4.06604352316069e-07
Pmp70	FBgn0031069	12223.3	-1.40916	3.39216778793879e-08	4.10186891570477e-07
CG10268	FBgn0032811	82.5221	1.30242	3.39980670830471e-08	4.10670442003145e-07
Snx1	FBgn0031534	1817.73	0.61354	3.42662610994274e-08	4.13467334463893e-07
CG15096	FBgn0034394	6610.31	-1.8341	3.54295351583706e-08	4.27047025274292e-07
Brf	FBgn0038499	361.508	0.709893	3.55481772083414e-08	4.27604963908614e-07
Archease	FBgn0038893	728.711	1.41173	3.55516270294522e-08	4.27604963908614e-07
CR45371	FBgn0266911	20.8906	2.68291	3.56552525462891e-08	4.28394631764892e-07
CG18528	FBgn0039189	208.137	1.51609	3.72297668644994e-08	4.46836414643918e-07
pk	FBgn0003090	86.5701	-1.32973	3.82575672744946e-08	4.58684244411103e-07
Ppn	FBgn0003137	1472.3	1.39801	3.86933356355456e-08	4.63416361613828e-07
CG2767	FBgn0037537	918.543	0.627283	3.88041845633485e-08	4.64251124330538e-07
CR44238	FBgn0265169	9.31812	-3.31946	3.9640889780814e-08	4.73759023842313e-07
CG13585	FBgn0035020	1865.72	-0.998942	3.97926054910209e-08	4.74566781342175e-07
CG30043	FBgn0050043	1281.56	-2.40498	3.97529697470676e-08	4.74566781342175e-07
UbcE2H	FBgn0029996	2163.69	0.769416	3.98407069066363e-08	4.74638706780012e-07
CG14450	FBgn0037184	196.27	0.734358	4.06480222095641e-08	4.8374576642226e-07
CSN5	FBgn0027053	714.08	0.649362	4.14351507785372e-08	4.9259364708478e-07
CG11164	FBgn0030507	55.0947	1.50318	4.17524769500666e-08	4.95843626263844e-07
Cyp6d2	FBgn0034756	982.689	1.94916	4.25192537730249e-08	5.04418739292604e-07
Mtl	FBgn0039532	292.989	1.09769	4.25828722626425e-08	5.04642820238585e-07
bora	FBgn0259791	10.4578	3.15441	4.34559162715116e-08	5.14448738064211e-07
Ada1-1	FBgn0051865	6.98389	3.84009	4.35216605595783e-08	5.14686975296816e-07
CR45048	FBgn0266408	57.3038	1.64355	4.39394531425252e-08	5.19083675763319e-07
CG5150	FBgn0035620	11120.7	-2.38407	4.44877928395188e-08	5.25011797924112e-07
DNApol-eta	FBgn0037141	61.2346	1.37223	4.5147959913186e-08	5.3224585552828e-07
bowl	FBgn0004893	549.364	-1.24944	4.65199267430246e-08	5.4784740450397e-07
Pvf2	FBgn0031888	68.5162	1.81752	4.73767269822572e-08	5.57355822537879e-07
AnxB11	FBgn0030749	451.553	0.686447	4.77360893855286e-08	5.60998500466181e-07
CG32647	FBgn0052647	69.5427	1.51081	4.79855801141051e-08	5.63343719924385e-07
Cisd2	FBgn0062442	2342.92	-0.451986	4.82526671498086e-08	5.65890427010541e-07
Ugt36Bc	FBgn0040260	4042.09	-1.21901	4.86107466635432e-08	5.69497864857834e-07
asp	FBgn0000140	44.75	2.50997	4.89269026620719e-08	5.72607174101136e-07
mei-41	FBgn0004367	134.663	0.877703	4.91450272004336e-08	5.74563934585794e-07
Sar1	FBgn0038947	6117.31	-0.472848	5.09634054430603e-08	5.95206149284271e-07
santa-maria	FBgn0025697	721.46	-1.07723	5.1301651639798e-08	5.98536953257705e-07
CG3198	FBgn0029887	614.527	0.501907	5.19867788174418e-08	6.05903758903283e-07
Gr89a	FBgn0038440	84.7874	1.45375	5.2197364644406e-08	6.07730307449112e-07
elg1	FBgn0036574	193.838	0.881005	5.26305657302642e-08	6.1214231192664e-07
mtg	FBgn0260386	49.7327	-1.28982	5.27736285312765e-08	6.13174126766078e-07
CG17337	FBgn0259979	3042.26	-0.721388	5.34840462276892e-08	6.20789104465833e-07
RpL37a	FBgn0030616	28181.7	-0.833258	5.46737722344423e-08	6.33747265510567e-07
CG9917	FBgn0030740	219.766	0.694045	5.4712802393839e-08	6.33747265510567e-07
Eip55E	FBgn0000566	2486.73	-0.796733	5.49880972087214e-08	6.36282782265431e-07
CG9593	FBgn0038365	12.4957	-2.53798	5.56063230156275e-08	6.4277718879335e-07
CG15611	FBgn0034194	1299.38	-0.490892	5.60081997453277e-08	6.46759989280233e-07
CG13102	FBgn0032088	4485.03	-1.19776	5.61965930155396e-08	6.48271945195621e-07
drm	FBgn0024244	2167.9	0.702583	5.68256622714526e-08	6.54859164194615e-07
squ	FBgn0267347	29.8197	1.84335	5.83382570965902e-08	6.71604302616052e-07
Pebp1	FBgn0038973	55863.2	-1.81431	5.89449101434353e-08	6.77896509926847e-07
CR14033	FBgn0046776	738.81	-1.62296	5.99303755073491e-08	6.88528000482599e-07
LpR1	FBgn0066101	4290.02	-1.29325	6.00463154960732e-08	6.89158221186875e-07
CG42813	FBgn0261995	1502.41	-0.407275	6.04254900820391e-08	6.92805263318664e-07
CG4594	FBgn0032161	321.132	-0.902758	6.04924653484004e-08	6.92869029503201e-07
Pex5	FBgn0023516	1210.87	-0.790633	6.3335278417589e-08	7.24694331751763e-07
pav	FBgn0011692	56.2339	2.32599	6.38792793431638e-08	7.30178348074543e-07
Nrx-1	FBgn0038975	396.048	-0.82276	6.40107386948276e-08	7.30940439225754e-07
Npl4	FBgn0039348	1191.36	0.50852	6.47870593614568e-08	7.3797173043632e-07
CG3038	FBgn0040373	38.888	1.68335	6.48227251251899e-08	7.3797173043632e-07
CG34375	FBgn0085404	18.6784	-2.93476	6.48210932813473e-08	7.3797173043632e-07
sta	FBgn0003517	47579.5	-1.00429	6.64365487372732e-08	7.5558179723177e-07
CG18428	FBgn0039149	135.116	1.12104	6.71941634554531e-08	7.63428551968199e-07
CG13890	FBgn0035169	414.445	-1.30007	7.21524537522648e-08	8.18937608886369e-07
CG7457	FBgn0035812	391.543	0.760259	7.39761150664204e-08	8.38792492642568e-07
FBgn0026753	FBgn0026753	15172.4	-0.504216	7.52732632112337e-08	8.52643529667809e-07
Tsp42Ec	FBgn0033124	5370.98	-1.02757	7.53958086208605e-08	8.53175037974472e-07
bbx	FBgn0024251	13.3047	-2.27553	7.58924612058692e-08	8.57934616557732e-07
CG12253	FBgn0026148	53.8071	1.29505	7.88546343254642e-08	8.9052851297286e-07
milt	FBgn0262872	7288.53	-0.798025	8.03699252975116e-08	9.06733497206526e-07
eIF-4a	FBgn0001942	32946.7	-0.714506	8.1299355812359e-08	9.16303029245788e-07
CG3746	FBgn0034755	76.8528	-1.48985	8.15374201424271e-08	9.18069035974913e-07
pbl	FBgn0003041	196.567	1.22961	8.46183525581742e-08	9.51808827080081e-07
Obp83b	FBgn0010403	5.59245	-3.65095	8.54573199166642e-08	9.60288329979886e-07
DOR	FBgn0035542	2442.47	1.01263	8.5597014112158e-08	9.60901008172505e-07
Sid	FBgn0039593	67.8701	-1.75993	8.64755618685532e-08	9.69798498012939e-07
lwr	FBgn0010602	1471.46	0.491161	8.70715271772078e-08	9.7551238293273e-07
CR45194	FBgn0266704	10.5775	-2.93899	8.73830439498952e-08	9.78031251828093e-07
mus301	FBgn0002899	69.7603	1.40623	8.75653907733811e-08	9.79100831224267e-07
TBCB	FBgn0034451	431.347	0.638939	8.94842840498571e-08	9.98603553357767e-07
dUTPase	FBgn0250837	300.856	1.4333	8.948663290593e-08	9.98603553357767e-07
CG40191	FBgn0058191	2013.94	0.788124	9.17704819794026e-08	1.02307764594034e-06
hfw	FBgn0001189	1215.74	-0.850094	9.24876397547658e-08	1.03005483880875e-06
CG7631	FBgn0028945	3484.84	-1.55445	9.37930068709387e-08	1.04356282398218e-06
Pen	FBgn0267727	193.825	2.62678	9.5640197444302e-08	1.06306670696218e-06
CG14606	FBgn0037485	285.952	-2.24391	9.81490248811401e-08	1.08987923101282e-06
asl	FBgn0261004	70.29	1.50395	9.83923799722483e-08	1.09150720830571e-06
CG43774	FBgn0264296	3233.49	-1.27012	1.01300564888413e-07	1.12266500301677e-06
CG13318	FBgn0037627	21.6215	-1.94018	1.03369449026085e-07	1.14446920894238e-06
CG14855	FBgn0038260	46.7148	-1.50611	1.04046716438376e-07	1.15083828907624e-06
IP3K1	FBgn0032147	379.565	-0.834055	1.04389641158049e-07	1.15350042266906e-06
CG7460	FBgn0036749	1271.63	0.917541	1.04724759475179e-07	1.15607117064479e-06
dl	FBgn0260632	1086.89	-0.727465	1.0582539309256e-07	1.16707926184776e-06
Lpin	FBgn0263593	6167.11	-1.18634	1.11843792058706e-07	1.23224771680305e-06
Ppt2	FBgn0032358	311.485	0.690418	1.11965763137853e-07	1.23238803875244e-06
egh	FBgn0001404	5235.93	-0.882845	1.13423240231702e-07	1.24721344668038e-06
CG18190	FBgn0034403	41.0439	1.85014	1.1450793583884e-07	1.25791483167847e-06
rho	FBgn0004635	71.5356	2.31798	1.15062674632686e-07	1.26277927549219e-06
shu	FBgn0003401	32.6419	2.0566	1.15880679645914e-07	1.27052072669116e-06
Ant2	FBgn0025111	79.7841	1.17874	1.16802841455998e-07	1.27938801680249e-06
Rpn9	FBgn0028691	2086.12	0.733361	1.18369157850124e-07	1.29474911620289e-06
Ada	FBgn0037661	72.0172	1.26724	1.184347711329e-07	1.29474911620289e-06
CG30076	FBgn0050076	14.2385	-2.43374	1.20469723811898e-07	1.31572064283236e-06
Cpr49Ag	FBgn0033730	6.64643	3.74418	1.20985749612673e-07	1.32007855621874e-06
CG31650	FBgn0031673	450.059	0.645406	1.21202862791992e-07	1.32116975654034e-06
RpL22	FBgn0015288	10164	-1.10098	1.3272028806175e-07	1.44531881265701e-06
CG5026	FBgn0035945	509.571	0.566814	1.35780714274619e-07	1.47722084710343e-06
cuff	FBgn0260932	159.156	1.98321	1.36041282941229e-07	1.47862982094696e-06
CG5758	FBgn0032666	133.552	-0.940623	1.36708371770808e-07	1.48445028904548e-06
wmd	FBgn0034876	821.785	0.500241	1.37348916105641e-07	1.48965646568734e-06
CG6454	FBgn0039187	1935.99	-0.581239	1.37451903986928e-07	1.48965646568734e-06
CG14879	FBgn0038419	813.808	-0.833144	1.39143045542072e-07	1.50653727428566e-06
CG18747	FBgn0042104	1829.16	-0.691706	1.39363712341784e-07	1.5074797724257e-06
bnl	FBgn0014135	209.985	-0.998753	1.40563325693208e-07	1.51899946405247e-06
Df31	FBgn0022893	2273.13	1.43976	1.41922390742877e-07	1.53075374030701e-06
sgl	FBgn0261445	2711.65	-0.843143	1.41821341504223e-07	1.53075374030701e-06
Mapmodulin	FBgn0034282	1368.21	0.686842	1.42692051524268e-07	1.53758521995873e-06
Snoo	FBgn0085450	546.076	-0.87647	1.42833176281431e-07	1.53763730420525e-06
DNApol-epsilon255	FBgn0264326	123.304	1.91066	1.43895569980157e-07	1.54759754100679e-06
Ho	FBgn0037933	539.486	0.805157	1.45616752856004e-07	1.56461733878232e-06
28SrRNA-Psi:CR40596	FBgn0085753	207.139	-1.75067	1.46239433126571e-07	1.56981283019408e-06
CG3040	FBgn0029925	426.44	0.729824	1.46590833550695e-07	1.57208914840204e-06
Yeti	FBgn0267398	2330.94	0.953121	1.47954519945658e-07	1.58520692690116e-06
Lk6	FBgn0017581	11296.6	-0.682137	1.50605295299902e-07	1.61196909292826e-06
CG42668	FBgn0261550	1473.29	-0.706054	1.50738113192636e-07	1.61196909292826e-06
Top3beta	FBgn0026015	606.417	0.508341	1.53033457168577e-07	1.63496540130292e-06
Abi	FBgn0020510	966.657	0.788151	1.54357688153666e-07	1.64608201846078e-06
TRAM	FBgn0040340	2262.57	-0.871711	1.54365784039311e-07	1.64608201846078e-06
CG9981	FBgn0030746	755.908	-1.20207	1.54779576557364e-07	1.64893596102e-06
RpL26	FBgn0036825	32278.5	-0.848609	1.55199381460058e-07	1.65184851097393e-06
CG18012	FBgn0038552	1461.72	-0.617365	1.55395423575333e-07	1.65237621939388e-06
CG17323	FBgn0032713	115.943	-1.62177	1.56459648252553e-07	1.66212594311234e-06
Rpb11	FBgn0032634	246.232	0.873556	1.56978332358403e-07	1.66499575061291e-06
l(3)72Ab	FBgn0263599	2136.52	0.597357	1.57024949357572e-07	1.66499575061291e-06
CG8629	FBgn0035742	9.69651	3.60123	1.57625655797447e-07	1.66979591427868e-06
Oseg6	FBgn0034452	74.7336	1.29119	1.65741276388963e-07	1.75412108838676e-06
Ir68a	FBgn0036150	19.4233	2.88835	1.6614912017629e-07	1.75678947875249e-06
Gp93	FBgn0039562	20889.6	-0.978552	1.67597764060687e-07	1.77044754132272e-06
CG9527	FBgn0031813	22458.2	-1.4377	1.68869126821211e-07	1.78220906342087e-06
Dyrk3	FBgn0027101	820.83	0.82518	1.70452615971307e-07	1.79388657965325e-06
CG15440	FBgn0031607	287.432	-0.595298	1.70241123850332e-07	1.79388657965325e-06
vanin-like	FBgn0040069	4692.95	-1.26119	1.70319372294379e-07	1.79388657965325e-06
18SrRNA-Psi:CR41602	FBgn0085813	185.663	-1.80278	1.70916589060569e-07	1.79709315729854e-06
CG8735	FBgn0033309	410.963	0.654704	1.75932708699409e-07	1.84811249492246e-06
hng2	FBgn0037634	65.824	1.0803	1.77293306209019e-07	1.86067263316293e-06
mira	FBgn0021776	257.659	-1.35524	1.79914472399372e-07	1.88642665205364e-06
Hydr2	FBgn0014906	3186.79	-0.587987	1.81179157317751e-07	1.89792316885689e-06
CG14247	FBgn0039454	31.1186	-2.84043	1.83337957865663e-07	1.91875588185567e-06
CG1628	FBgn0030218	170.74	-1.58594	1.85750282395557e-07	1.94220082111833e-06
Spt3	FBgn0037981	157.617	0.710886	1.93438695245709e-07	2.02071792570564e-06
spi	FBgn0005672	595.475	1.10362	2.01682742108938e-07	2.10488871089088e-06
Socs36E	FBgn0041184	2375.45	1.30285	2.03806180811136e-07	2.12508441026917e-06
CG44006	FBgn0264748	33.3562	1.65064	2.1111923486225e-07	2.19930490093804e-06
mip120	FBgn0033846	284.023	0.691851	2.15341002478359e-07	2.24121511989008e-06
SNF4Agamma	FBgn0264357	4325.8	-0.508463	2.1691706226171e-07	2.25553760040241e-06
pix	FBgn0086706	5405.23	-0.701695	2.21609155395415e-07	2.3022048721649e-06
RpLP1	FBgn0002593	40066.6	-0.756139	2.22358246047288e-07	2.30786175888271e-06
GstD3	FBgn0010039	87.0829	1.38954	2.23181159046591e-07	2.31214861006763e-06
CG1236	FBgn0037370	348.443	0.575672	2.23122960774649e-07	2.31214861006763e-06
dpy	FBgn0053196	213.674	-1.10328	2.37019490832869e-07	2.45326045465728e-06
Aldh	FBgn0012036	7848.68	-0.536708	2.37618552861971e-07	2.45720670338108e-06
bip1	FBgn0026263	135.335	1.13413	2.42744922799874e-07	2.50791961449467e-06
CycA	FBgn0000404	150.71	1.70163	2.51871162974683e-07	2.59982658799668e-06
PpD3	FBgn0005777	1759.36	0.406758	2.54036258591547e-07	2.6173854515341e-06
RpL18A	FBgn0010409	26831.2	-0.783122	2.53892241584503e-07	2.6173854515341e-06
Ipk2	FBgn0031267	417.204	-0.997858	2.63642775223866e-07	2.71388484495954e-06
drl	FBgn0015380	137.372	-0.945542	2.69676568767827e-07	2.77346494880458e-06
CG42514	FBgn0260388	603.697	-0.967824	2.70063888836623e-07	2.7749187557876e-06
Hs3st-A	FBgn0053147	111.449	2.39395	2.72223765990603e-07	2.794566449414e-06
Atg18b	FBgn0032935	1056.1	1.35226	2.7734141882271e-07	2.84451444287074e-06
ArgRS-m	FBgn0037526	288.911	0.602653	2.79374716090672e-07	2.86276616433693e-06
CG11486	FBgn0035397	3658.5	-0.924133	2.88451110812919e-07	2.95309022884878e-06
CG11788	FBgn0034495	89.0633	1.15409	2.90019718377163e-07	2.96645735515064e-06
ifc	FBgn0001941	6310.49	-0.826238	3.00514897682544e-07	3.07102271345513e-06
CG1946	FBgn0033216	2269.52	-1.90491	3.00991906152015e-07	3.07311374226881e-06
SLC5A11	FBgn0031998	1054.42	-1.44366	3.03972146303253e-07	3.10073576364674e-06
CG7227	FBgn0031970	117.404	-1.96287	3.0865281929989e-07	3.14563785667693e-06
CG5773	FBgn0034290	414.428	-1.19678	3.12911650587112e-07	3.1861635757435e-06
gro	FBgn0001139	1358.42	0.421928	3.14327930555171e-07	3.19769856855134e-06
emc	FBgn0000575	2189.41	-1.34435	3.19965245029575e-07	3.2521152202015e-06
CG18745	FBgn0042102	2225.69	-1.28055	3.20898634897117e-07	3.25866642566091e-06
CG4781	FBgn0035043	5028.86	-0.525094	3.25830719675382e-07	3.30280519261245e-06
CG15534	FBgn0039769	2719.24	-3.06591	3.25591041283717e-07	3.30280519261245e-06
Akt1	FBgn0010379	1765.63	0.640769	3.29251597966194e-07	3.33448521387307e-06
Tes	FBgn0034223	410.189	0.780292	3.32092055064573e-07	3.36023548451884e-06
CG3436	FBgn0031229	707.551	0.481796	3.33116955659747e-07	3.36758556787927e-06
P32	FBgn0034259	2668.68	0.838662	3.37374664810606e-07	3.40757472550874e-06
CG9514	FBgn0030592	9.85988	3.02604	3.54570238945445e-07	3.5780513736874e-06
CG12910	FBgn0033502	516.293	-0.947483	3.62667161285829e-07	3.65648875212397e-06
Gtp-bp	FBgn0010391	2597.2	-0.502581	3.65035310358067e-07	3.67707890308903e-06
timeout	FBgn0038118	91.5433	1.22578	3.7311513306738e-07	3.75511590657108e-06
CG4022	FBgn0035986	180.753	0.73684	3.7960195903596e-07	3.81699581269492e-06
CG11034	FBgn0031741	5503.81	-1.25879	3.81215502463418e-07	3.8263997320216e-06
Nnf1b	FBgn0051658	73.2061	1.00591	3.81183148208126e-07	3.8263997320216e-06
mus201	FBgn0002887	265.356	0.92033	4.05597098404719e-07	4.06750796817959e-06
CG10184	FBgn0039094	1992.45	-1.50549	4.21622910563656e-07	4.22446685344509e-06
TER94	FBgn0261014	11161.9	0.506003	4.22081534749174e-07	4.22530956081649e-06
DIP-beta	FBgn0259245	14.098	2.36678	4.22669100652556e-07	4.22744041982459e-06
Octbeta2R	FBgn0038063	17.7805	-2.15951	4.27975009707153e-07	4.27671750178573e-06
FBgn0032340	FBgn0032340	1074.11	0.528474	4.2843491936192e-07	4.27752456658511e-06
tna	FBgn0026160	1286.17	-1.10674	4.30547809826123e-07	4.29183254214264e-06
CG9914	FBgn0030737	1337.34	-1.67496	4.30628828018567e-07	4.29183254214264e-06
CG31663	FBgn0051663	361.355	-2.53427	4.3158841013497e-07	4.29759968503331e-06
sni	FBgn0030026	703.411	0.629087	4.33270206275342e-07	4.30916225763959e-06
CG8475	FBgn0031995	1100.84	-0.469362	4.33513487184979e-07	4.30916225763959e-06
28SrRNA-Psi:CR40741	FBgn0085771	44.1057	-1.80638	4.34706360696916e-07	4.31721581107624e-06
CG7945	FBgn0036505	1189.55	0.561563	4.49785199452633e-07	4.46304012332858e-06
Prosbeta2	FBgn0023174	2644.07	0.407828	4.51723513038262e-07	4.47833451150937e-06
snz	FBgn0029976	450.846	-0.501445	4.52832807667589e-07	4.48539046190144e-06
su(Hw)	FBgn0003567	942.895	0.595814	4.60534375057344e-07	4.55767440297979e-06
RfC38	FBgn0028700	154.65	0.841484	4.61777375628633e-07	4.56597050994061e-06
chn	FBgn0015371	108.354	1.13766	4.66832518974304e-07	4.61009893614337e-06
Ack	FBgn0028484	406.291	0.696916	4.67057532708019e-07	4.61009893614337e-06
CR44274	FBgn0265301	36.9515	-1.32032	4.79830763361365e-07	4.73203730091164e-06
Tina-1	FBgn0035083	3833.66	-0.978693	4.82492623413567e-07	4.75413255663918e-06
CG11912	FBgn0031248	3317.52	-2.41412	4.84854512048549e-07	4.77323612995788e-06
CG6693	FBgn0037878	240.847	0.772161	4.85392109242275e-07	4.77436249038478e-06
CG7956	FBgn0038890	570.899	0.850677	4.862736464083e-07	4.77886696757704e-06
Gagr	FBgn0036627	158.252	-1.13015	4.90657595435252e-07	4.81356434060914e-06
CG43295	FBgn0262987	19.6432	2.27283	4.90399365714274e-07	4.81356434060914e-06
Sec31	FBgn0033339	2209.27	-0.836205	5.01613812884912e-07	4.91677414158782e-06
cln3	FBgn0036756	2975.66	-1.04795	5.03176191258448e-07	4.92780710918213e-06
CG31286	FBgn0051286	15.7561	-2.24734	5.1263919696779e-07	5.01612785792767e-06
CG9426	FBgn0032485	519.231	0.642766	5.1500445014213e-07	5.03490485832194e-06
emb	FBgn0020497	2570.36	0.578154	5.23804346675468e-07	5.11650271791569e-06
RpL23A	FBgn0026372	32641.3	-0.750545	5.37399573086452e-07	5.24475950135065e-06
SkpB	FBgn0026176	5.9727	-3.36148	5.39525938660379e-07	5.26096079513085e-06
Jon65Aii	FBgn0035666	13668.1	-1.97121	5.40421575183127e-07	5.26514353300176e-06
CG6664	FBgn0036685	695.154	0.54746	5.42277872652959e-07	5.27867037038023e-06
BG642312	FBgn0047334	83.9343	-1.18341	5.44104602358244e-07	5.29188631362561e-06
CG3184	FBgn0029892	157.648	-0.772107	5.48807224870543e-07	5.33302593539144e-06
Cyp4e3	FBgn0015035	46.0438	-2.69005	5.53344428520587e-07	5.37248867690986e-06
CG2681	FBgn0024997	2250.66	-0.687608	5.65378178791598e-07	5.47989399753162e-06
CG8924	FBgn0030710	35.8665	1.57156	5.65075982467039e-07	5.47989399753162e-06
Ref1	FBgn0010774	1535.67	0.7211	5.66559288081461e-07	5.48662823015884e-06
CG42806	FBgn0261975	822.999	-0.91031	5.67362591844724e-07	5.4896953354993e-06
Eaf6	FBgn0035624	115.169	0.822713	5.68426636278646e-07	5.49313209619133e-06
cana	FBgn0040233	1522.8	-0.839482	5.68691569611015e-07	5.49313209619133e-06
CG42540	FBgn0260657	22.5265	2.76366	5.72238128795703e-07	5.52266088030207e-06
CG14561	FBgn0037149	40.9323	1.26971	5.78354007836156e-07	5.57691445846796e-06
tos	FBgn0015553	19.9411	2.03654	5.82554085265566e-07	5.61261758323323e-06
Sgf11	FBgn0036804	168.553	0.931012	5.89328990611395e-07	5.67304579528819e-06
CG7946	FBgn0039743	621.417	0.466674	6.04220130019815e-07	5.81143350970464e-06
wac	FBgn0035120	68.7185	1.35405	6.09960180543778e-07	5.8616445970144e-06
CG13384	FBgn0032036	533.078	-0.689139	6.11120606581993e-07	5.86779802847493e-06
Reph	FBgn0021800	447.734	0.755844	6.15620273451086e-07	5.90331869149233e-06
qkr58E-2	FBgn0022985	736.214	0.43357	6.15866521883218e-07	5.90331869149233e-06
CG1532	FBgn0031143	6443.74	-1.77261	6.16676969963541e-07	5.90606924883588e-06
kek6	FBgn0039862	43.6905	1.39658	6.27767782371889e-07	6.00718924573338e-06
thoc6	FBgn0036263	180.072	0.723677	6.29577168265375e-07	6.01864216803419e-06
AdamTS-A	FBgn0038341	245.588	1.23515	6.30031590183335e-07	6.01864216803419e-06
fand	FBgn0033859	620.273	0.475619	6.53312624131931e-07	6.23576398092762e-06
Tango13	FBgn0086674	1025.99	-0.677058	6.6454172745479e-07	6.33758222243867e-06
CG8525	FBgn0033735	745.748	-0.617574	6.68069906911171e-07	6.36584855555054e-06
per	FBgn0003068	274.547	-1.067	6.6972248459074e-07	6.37491717165326e-06
Pde8	FBgn0266377	1083.11	-0.792267	6.70151725366137e-07	6.37491717165326e-06
Indy	FBgn0036816	3762.07	-0.830107	6.71470322435146e-07	6.38207934095478e-06
CG4662	FBgn0038735	249.135	0.628996	6.78896196321397e-07	6.44722801927441e-06
thoc5	FBgn0034939	360.15	0.545014	6.83862708939575e-07	6.48499537679308e-06
CG32473	FBgn0052473	12859.2	-1.21568	6.84022735187357e-07	6.48499537679308e-06
S1P	FBgn0037105	414.934	0.651542	6.89634627499294e-07	6.5327102161604e-06
CG12825	FBgn0033221	5893.66	-0.798486	7.06195488205675e-07	6.67837175015627e-06
CG43055	FBgn0262357	905.456	1.97801	7.06077388511952e-07	6.67837175015627e-06
CG13994	FBgn0031772	310.766	0.614463	7.17698601828595e-07	6.78147037339213e-06
CR45952	FBgn0267614	58.4839	-1.38074	7.23795596182973e-07	6.8333572519969e-06
AcCoAS	FBgn0012034	2957.3	-0.516697	7.27895256992307e-07	6.86631629547425e-06
CG5913	FBgn0039385	270.103	-0.786633	7.31902490203599e-07	6.89834911819298e-06
Pvf1	FBgn0030964	1134.18	1.43526	7.32834528059414e-07	6.90136823503031e-06
CG6746	FBgn0032394	1218.84	-0.681526	7.39477630995995e-07	6.95812062793729e-06
Cyp4e2	FBgn0014469	1755.31	-1.95428	7.47600191363194e-07	7.01232157797641e-06
Mgstl	FBgn0025814	2247.11	0.962626	7.47724061186458e-07	7.01232157797641e-06
LeuRS-m	FBgn0027085	752.354	0.438569	7.46855259803606e-07	7.01232157797641e-06
CG7120	FBgn0035888	53.8992	-1.24893	7.47120161921515e-07	7.01232157797641e-06
sip2	FBgn0031878	58.7262	1.98991	7.48511371615601e-07	7.01387482937476e-06
CG9171	FBgn0031738	884.929	-0.805468	7.54380748131487e-07	7.06300713727754e-06
RpL27	FBgn0039359	22335.8	-0.825507	7.55096644012538e-07	7.06384770957666e-06
PyK	FBgn0267385	9264.73	-0.544309	7.61894266644818e-07	7.12153365061047e-06
wun	FBgn0016078	1336.59	-0.707927	7.67570801635289e-07	7.16272438713758e-06
Alr	FBgn0031068	403.679	0.806869	7.67026697979211e-07	7.16272438713758e-06
Aos1	FBgn0029512	601.685	0.834776	7.7588037023737e-07	7.23428292315537e-06
Wdr62	FBgn0031374	1661.29	-0.777282	7.82960726292381e-07	7.29427160531019e-06
MtnC	FBgn0038790	2940.77	-1.44519	7.9612423628536e-07	7.41078682654408e-06
CR43671	FBgn0263746	23.9688	1.90278	8.09988043323639e-07	7.53362333452374e-06
CG3699	FBgn0040349	2658.39	-1.67976	8.11847583483267e-07	7.54469887714845e-06
rdgA	FBgn0261549	210.453	-0.737674	8.27371838593486e-07	7.68264122058577e-06
sra	FBgn0086370	1484.09	1.05578	8.33950528686213e-07	7.73736008605087e-06
sle	FBgn0037810	356.656	0.939606	8.46390208466771e-07	7.84632237627125e-06
Pink1	FBgn0029891	2935.92	-0.750807	8.53605496382618e-07	7.90671363726494e-06
E2f1	FBgn0011766	1762.28	-0.702675	8.59441334852793e-07	7.95423883495424e-06
CG6479	FBgn0036710	168.724	0.756734	8.65092059923394e-07	7.99997427873421e-06
dock	FBgn0010583	442.034	-0.917312	8.67408730298161e-07	8.01482825161659e-06
mdlc	FBgn0038772	161.03	0.747903	8.88983694229544e-07	8.20745829647931e-06
CG30345	FBgn0050345	1377.28	-1.09583	8.94316525528864e-07	8.24994197957207e-06
CG30151	FBgn0050151	34.3478	-1.72175	8.97605179920319e-07	8.27351441165118e-06
CG6770	FBgn0032400	13063.1	-0.922679	9.01826369457704e-07	8.3056368165076e-06
Ip259	FBgn0025366	3867.48	-1.23204	9.03998123228784e-07	8.31884732974482e-06
CG12290	FBgn0039419	1374.56	-0.959006	9.05651252161052e-07	8.32726766656968e-06
Fbxl4	FBgn0030555	253.692	0.739016	9.10753619223362e-07	8.36736346260421e-06
CG12115	FBgn0030097	15.1345	-2.40311	9.12912933660319e-07	8.38037731290132e-06
RpL18	FBgn0035753	23912.5	-0.701932	9.14513490420229e-07	8.38824487717156e-06
CG18180	FBgn0036024	60795.9	-1.54706	9.23995035308707e-07	8.46832817900312e-06
CG9911	FBgn0030734	3141.25	-0.606144	9.29908860966301e-07	8.51561020245276e-06
Cyp4d8	FBgn0015033	562.166	-2.38347	9.36656872244491e-07	8.56350310588521e-06
CG5780	FBgn0032446	63.9177	1.17296	9.35949868534662e-07	8.56350310588521e-06
CG16865	FBgn0028919	206.103	0.898822	9.52478609805801e-07	8.7011041909547e-06
Tsp42Ee	FBgn0029506	1283.81	1.32876	9.69403200520987e-07	8.84854927854189e-06
CG17734	FBgn0037890	2143.02	-0.465415	9.84504367478791e-07	8.97912552457213e-06
CG3841	FBgn0032131	5174.98	-1.93293	9.85584915892274e-07	8.9817197262493e-06
Cpr11B	FBgn0030398	5.83079	3.52323	9.90258419449752e-07	9.01702622133341e-06
Abp1	FBgn0036372	2028.22	0.968392	1.00706333061927e-06	9.1626520129408e-06
spin	FBgn0086676	1747.56	-0.75421	1.01966168427001e-06	9.26980106521693e-06
CG9864	FBgn0034490	6825.71	-2.05229	1.05399867671651e-06	9.57424562859551e-06
CAHbeta	FBgn0037646	129.259	-1.40427	1.07439214635688e-06	9.75164295671626e-06
CG5149	FBgn0031904	1231.89	-0.567002	1.07677869688483e-06	9.76544795679638e-06
CG5973	FBgn0031914	868.153	-1.99387	1.08882618187754e-06	9.86677669392966e-06
CG2765	FBgn0035087	2420.76	-0.986355	1.0917968539278e-06	9.88575610434466e-06
RpL32	FBgn0002626	24434.5	-0.769085	1.1151513386509e-06	1.00891238192938e-05
TotC	FBgn0044812	40.3739	3.35952	1.12474224299867e-06	1.01677419755697e-05
Orc1	FBgn0022772	71.4732	1.5772	1.13815412315718e-06	1.02807484527296e-05
step	FBgn0086779	583.881	-0.649621	1.14366425567942e-06	1.03222561060601e-05
CG14906	FBgn0015351	382.144	1.28386	1.18635130798835e-06	1.06989731868302e-05
CG8003	FBgn0036096	605.796	0.511587	1.18947552247012e-06	1.07185805467316e-05
NELF-B	FBgn0027553	300.368	0.543	1.20147807243051e-06	1.08180970575906e-05
Rpn5	FBgn0028690	3138.5	0.411772	1.21445120629471e-06	1.09261870091044e-05
mri	FBgn0035107	667.769	0.728863	1.21989074691437e-06	1.09663804037354e-05
CG44774	FBgn0266000	457.214	0.650063	1.22340329194077e-06	1.09892005889138e-05
CG10639	FBgn0032729	1035.01	-0.70343	1.22504788825511e-06	1.09952189938696e-05
CG43078	FBgn0262508	3581.01	-1.33788	1.23488377374867e-06	1.10746889788812e-05
CR44230	FBgn0265161	5.18221	-3.24119	1.23630915034976e-06	1.10786654759698e-05
f-cup	FBgn0028487	618.068	-0.62576	1.23772485906238e-06	1.10825490951919e-05
alpha-Est10	FBgn0015569	663.537	-1.27466	1.25466081569374e-06	1.12252841575391e-05
RpL5	FBgn0064225	70886.3	-0.939936	1.25655539824529e-06	1.12333264683069e-05
borr	FBgn0032105	25.934	1.91742	1.26454355941394e-06	1.12957881530547e-05
TfIIEalpha	FBgn0015828	415.191	0.667963	1.27278310532019e-06	1.13603947739101e-05
CG17904	FBgn0032597	983.213	0.842206	1.29527411469749e-06	1.155200202531e-05
Cpsf73	FBgn0261065	337.855	0.583644	1.29929743767573e-06	1.15787311942003e-05
for	FBgn0000721	1979.52	-0.546137	1.30362985341191e-06	1.16081704863403e-05
Vha16-1	FBgn0262736	105215	-0.432311	1.31088208394266e-06	1.16635423273195e-05
fh	FBgn0030092	141.203	0.881367	1.31582059636586e-06	1.16982568701337e-05
CG12773	FBgn0024365	2958.86	-0.5389	1.32337241508373e-06	1.17561319582477e-05
Sox21a	FBgn0036411	712.707	2.09362	1.34840989345797e-06	1.19691270007811e-05
RpL30	FBgn0086710	14757.7	-0.73619	1.3768485011329e-06	1.2211953451086e-05
msl-2	FBgn0005616	203.723	0.875461	1.39092473808333e-06	1.23271114650873e-05
CG7718	FBgn0038649	288.654	0.57174	1.39783836657415e-06	1.23786596952037e-05
Taf12L	FBgn0031623	5.41027	3.47092	1.45767771741132e-06	1.28984470649682e-05
MFS14	FBgn0010651	2673.52	-0.731675	1.47730998296892e-06	1.30556104090973e-05
CR43723	FBgn0263967	6.76337	3.30317	1.47775345616179e-06	1.30556104090973e-05
Hydr1	FBgn0033382	3768.03	-0.889663	1.49470465071054e-06	1.3195037456429e-05
RpL13	FBgn0011272	27361.3	-0.662309	1.50134551948837e-06	1.3243299570655e-05
Ucp4A	FBgn0030872	1329.96	-0.604248	1.51153419548348e-06	1.33227568698786e-05
CG17002	FBgn0033122	292.32	0.778415	1.55283745182347e-06	1.36761218824921e-05
CG11210	FBgn0033259	1869.57	-0.780734	1.55407916443885e-06	1.36763815391569e-05
Jon25Bii	FBgn0031654	63128.5	-1.89213	1.55625910523356e-06	1.36848910563095e-05
CycH	FBgn0022936	178.781	0.69516	1.56306923699114e-06	1.37340709748707e-05
snRNA:7SK	FBgn0065099	109.942	-1.6958	1.56959081757599e-06	1.37806409368811e-05
Rab39	FBgn0029959	625.178	0.532387	1.58343097609546e-06	1.38913439131485e-05
Tsp29Fb	FBgn0032075	28976.8	-0.588232	1.597228367019e-06	1.40014999508223e-05
CG32549	FBgn0052549	2482.15	0.65148	1.61418236036209e-06	1.41391346192586e-05
CG12375	FBgn0031987	1408.9	-0.642597	1.62393735218949e-06	1.42135463207151e-05
Su(Tpl)	FBgn0014037	3243.77	-0.704889	1.66093887595972e-06	1.45261336423082e-05
CG17597	FBgn0032715	8177.18	-0.777209	1.67027952199335e-06	1.45965093471177e-05
CG11619	FBgn0036836	43.1531	-1.47616	1.68833716589515e-06	1.47371316994523e-05
mtTFB2	FBgn0037778	182.568	0.72214	1.68898345039814e-06	1.47371316994523e-05
Jon65Aiii	FBgn0035665	311188	-1.34522	1.69078747501698e-06	1.47414716330306e-05
CG2061	FBgn0027498	319.496	-0.583587	1.70091269010848e-06	1.48182988183814e-05
CG4364	FBgn0032138	3875.74	-1.11829	1.70563036683043e-06	1.48443896976023e-05
CG14856	FBgn0038261	35.5856	-1.99953	1.70653903898158e-06	1.48443896976023e-05
CG30016	FBgn0050016	63.8099	-2.68572	1.70845328628263e-06	1.48495916608941e-05
rl	FBgn0003256	1613.41	0.864276	1.72165920018157e-06	1.49528553475354e-05
CG11537	FBgn0035400	2147.04	-0.736466	1.72355370128985e-06	1.4957794506117e-05
CG7231	FBgn0031968	4519.35	-1.0544	1.73166076847535e-06	1.50166001459945e-05
betaTub60D	FBgn0003888	3061.39	1.94685	1.74393944864362e-06	1.51114630258044e-05
CG8320	FBgn0034059	588.975	-0.553792	1.76735166096469e-06	1.53025797689974e-05
ATP8B	FBgn0037989	431.8	-1.78561	1.8130078038765e-06	1.56858543277107e-05
CG7777	FBgn0033635	1892.58	0.982265	1.83608109132702e-06	1.58733079481621e-05
Amyrel	FBgn0020506	433.634	3.0958	1.89257509686707e-06	1.63366734834386e-05
CG30289	FBgn0050289	7.99355	-2.68191	1.89219322500936e-06	1.63366734834386e-05
kug	FBgn0261574	2258.56	0.722301	1.906956426275e-06	1.64482281355004e-05
CG4459	FBgn0038753	141.781	-1.67649	1.92577966771697e-06	1.65978962652276e-05
CG42747	FBgn0261801	107.28	2.33752	1.96675446693322e-06	1.69381098442294e-05
Best1	FBgn0040238	829.223	-0.689028	1.97236241060132e-06	1.69734498218185e-05
CG9485	FBgn0034618	905.473	-1.1943	2.00433659802309e-06	1.72354615083053e-05
CG3764	FBgn0036684	557.635	-0.690094	2.0153596988338e-06	1.73170511212817e-05
xit	FBgn0029906	454.879	-0.503448	2.02780909751407e-06	1.7410762738321e-05
VhaM8.9	FBgn0037671	15756.7	-0.492168	2.04591939628542e-06	1.75528993375606e-05
tgy	FBgn0030984	591.285	-0.760722	2.05058421495433e-06	1.75795525175644e-05
CG3860	FBgn0034951	2359.64	-0.62361	2.06726622243393e-06	1.77091097353832e-05
RpS8	FBgn0039713	38953.8	-0.677274	2.0831073674471e-06	1.78312726248393e-05
p24-1	FBgn0030341	1420.87	-0.506262	2.1213501983943e-06	1.81311158623367e-05
RpS6	FBgn0261592	36079.4	-0.824705	2.11974641364812e-06	1.81311158623367e-05
CG12054	FBgn0039831	1271.04	-0.552514	2.14549258078877e-06	1.83235785741551e-05
CG17841	FBgn0028480	4527.85	-0.809637	2.15247496601648e-06	1.83554214411171e-05
CG9568	FBgn0032087	20256.7	-0.676639	2.15235417895584e-06	1.83554214411171e-05
CR33013	FBgn0053013	122.123	-1.51406	2.17255238755395e-06	1.85126405108638e-05
CG14829	FBgn0035751	5.99958	-2.96338	2.17843683337783e-06	1.85487730974858e-05
CG42327	FBgn0259227	946.609	-0.785898	2.18600297709145e-06	1.85991595682849e-05
Ugt86Dh	FBgn0040252	2124.11	-1.08947	2.20575363102423e-06	1.87530613905165e-05
Ubc6	FBgn0004436	2574.4	0.652887	2.21389547505755e-06	1.88081089981922e-05
Picot	FBgn0024315	13481.8	-0.834848	2.24104352259132e-06	1.90244191285743e-05
MED19	FBgn0036761	639.505	1.0302	2.28329480144097e-06	1.93685202630504e-05
Nnf1a	FBgn0034523	42.0152	1.48536	2.28534412227509e-06	1.93713391341153e-05
CG34010	FBgn0054010	106.711	1.16119	2.29519598648538e-06	1.94402410807268e-05
CG9662	FBgn0031529	92.3313	1.04256	2.29801329524032e-06	1.94495018731442e-05
CG2091	FBgn0037372	245.413	0.583831	2.30900654601948e-06	1.9527894941673e-05
Plap	FBgn0024314	1069.83	0.556848	2.35041976022528e-06	1.98483800410641e-05
Kank	FBgn0027596	1259.68	-0.563057	2.35038093586641e-06	1.98483800410641e-05
dan	FBgn0039286	6.47412	-3.27871	2.37739608250086e-06	2.00611687380514e-05
CG3332	FBgn0031514	3107.52	-0.978055	2.41260523230355e-06	2.03430584684968e-05
Cdk2	FBgn0004107	63.8987	1.02998	2.42022757470476e-06	2.03768712670292e-05
CG11652	FBgn0036194	553.249	-0.920227	2.41842863731504e-06	2.03768712670292e-05
kuk	FBgn0038476	120.226	1.45059	2.42731215143474e-06	2.04212794127418e-05
CG12173	FBgn0037305	389.387	-0.647682	2.44474583146811e-06	2.05526247918206e-05
CG13492	FBgn0034662	42839.2	-0.961041	2.44902791398419e-06	2.05732933176244e-05
Pabp2	FBgn0005648	883.492	0.433714	2.45381269811834e-06	2.05981509376273e-05
CG10051	FBgn0034437	737.866	-1.93726	2.46139564018154e-06	2.06464428345934e-05
CG2852	FBgn0034753	6525.74	-0.802716	2.47166904458096e-06	2.07172140868962e-05
CstF-64	FBgn0027841	240.188	0.62391	2.48108003901185e-06	2.0780657015688e-05
NSD	FBgn0039559	479.503	0.523334	2.51416315051712e-06	2.10421280891203e-05
CG42269	FBgn0259164	106.322	-1.20709	2.52675849789306e-06	2.11318675857891e-05
CG15514	FBgn0039712	383.289	0.486941	2.53600745562095e-06	2.11935082328263e-05
DCP1	FBgn0034921	454.108	0.513226	2.57715659668281e-06	2.15214513129352e-05
cpb	FBgn0011570	2321.08	0.501592	2.61031992793403e-06	2.17822702862069e-05
CG31823	FBgn0051823	155.277	-0.920889	2.62469393678653e-06	2.18860288210094e-05
CR41621	FBgn0085827	142.33	-1.50991	2.672393122645e-06	2.22673110854364e-05
CG4025	FBgn0025624	603.247	-0.598712	2.6921288733333e-06	2.24152014383368e-05
CG16896	FBgn0035073	169.349	-0.810592	2.70257588276184e-06	2.24855907885834e-05
lva	FBgn0029688	3179.39	-0.771385	2.72035793190336e-06	2.26168593866866e-05
Rbf2	FBgn0038390	22.1845	1.77547	2.73686642065883e-06	2.27373541663276e-05
Caf1-180	FBgn0030054	141.547	1.00005	2.74424881640931e-06	2.27819096002427e-05
CG8664	FBgn0030836	437.563	-3.16814	2.78245715881446e-06	2.30821188718711e-05
Jon25Bi	FBgn0020906	105682	-2.09414	2.88120264361242e-06	2.38486634080963e-05
Pex11	FBgn0034058	840.75	-0.803024	2.8803632496493e-06	2.38486634080963e-05
CG10589	FBgn0037035	23.8553	1.82719	2.87741378911822e-06	2.38486634080963e-05
mRpL3	FBgn0030686	786.114	0.476058	2.96447071931362e-06	2.45199110376072e-05
CG8009	FBgn0036090	439.362	-0.850043	3.02240199420612e-06	2.49807613909402e-05
gammaTub37C	FBgn0010097	8.34546	2.80555	3.0340783010517e-06	2.5058910243386e-05
Dab	FBgn0000414	221.196	-0.914753	3.07125041826939e-06	2.53473644615327e-05
CG1941	FBgn0033214	1324.47	-0.911003	3.07730381075468e-06	2.53787584743672e-05
CG5819	FBgn0034717	4876.13	-0.567611	3.11508243400672e-06	2.56715558951526e-05
CG8800	FBgn0033408	4.91097	-3.3126	3.12954902059975e-06	2.57719504017565e-05
tzn	FBgn0037024	1957.55	-0.679065	3.15268349678568e-06	2.59435267766127e-05
Cyp6u1	FBgn0033121	799.636	-0.871779	3.17183628797234e-06	2.60821115166939e-05
ImpE1	FBgn0001253	11.1175	2.25749	3.18224834398574e-06	2.6148671388818e-05
Mtp	FBgn0266369	288.318	0.646037	3.18865170403817e-06	2.61822187226773e-05
mRpL16	FBgn0023519	602.305	0.450155	3.24430409834428e-06	2.6619810063651e-05
CG10804	FBgn0029663	21.6616	-2.39372	3.25035094621336e-06	2.66500431505662e-05
Gos28	FBgn0044871	383.13	0.551109	3.26819774546004e-06	2.67769113756573e-05
CG3964	FBgn0031574	21.6213	2.17781	3.27530354268041e-06	2.68156564357913e-05
CG10000	FBgn0039596	308.269	0.921162	3.28290728540912e-06	2.68584191399461e-05
CG14877	FBgn0038380	118.544	-1.15092	3.32076352549529e-06	2.71484449961144e-05
CG32204	FBgn0052204	11.3448	-2.34925	3.33084125565265e-06	2.72111158915809e-05
eff	FBgn0011217	10127.7	0.320616	3.36310693415085e-06	2.74548280977496e-05
CR45955	FBgn0267617	6.52052	-2.96826	3.37960651065883e-06	2.75695738635235e-05
CG30441	FBgn0050441	15.7324	2.50792	3.38879911895731e-06	2.76048813834033e-05
CR44667	FBgn0265878	13.0149	2.22541	3.38882828541159e-06	2.76048813834033e-05
Chd3	FBgn0023395	24.4304	1.8239	3.41300262608468e-06	2.77617127811733e-05
CR45999	FBgn0267661	289.864	1.194	3.41086420042519e-06	2.77617127811733e-05
yps	FBgn0022959	2154.16	0.415219	3.44329405149059e-06	2.79879275856749e-05
CG42788	FBgn0261859	303.101	0.780389	3.47078356928698e-06	2.81775198387951e-05
28SrRNA-Psi:CR45848	FBgn0267508	16.5206	-2.00256	3.47161430384021e-06	2.81775198387951e-05
CR44713	FBgn0265924	5.36682	3.37861	3.49714776724792e-06	2.83643573760539e-05
CR43629	FBgn0263620	36.8504	-1.23301	3.50567089923493e-06	2.8413059687621e-05
CG31104	FBgn0051104	2054.31	-1.48428	3.58735138329642e-06	2.9054198353446e-05
RpS30	FBgn0038834	21088	-0.695566	3.635245520762e-06	2.94209755848184e-05
neb	FBgn0004374	210.046	0.876003	3.64418361769865e-06	2.94721717382625e-05
Pdi	FBgn0014002	29516.4	-0.869268	3.66818963795288e-06	2.96450684064358e-05
CG13579	FBgn0035010	5.86242	3.17971	3.67509490840106e-06	2.96796139989841e-05
CG15706	FBgn0034093	943.759	-1.28384	3.71636159837717e-06	2.99914102667319e-05
CR18228	FBgn0037560	739.413	-0.733139	3.72792286401819e-06	3.00632063987514e-05
Bap55	FBgn0025716	489.865	0.453254	3.82712298326835e-06	3.08411439265954e-05
CR46064	FBgn0267733	216.315	0.651521	3.84296885076512e-06	3.09467341715432e-05
UQCR-14	FBgn0030733	6083.55	-0.413321	3.85913448115166e-06	3.10326124136515e-05
CG30049	FBgn0050049	687.916	-1.45606	3.85794891398214e-06	3.10326124136515e-05
mbo	FBgn0026207	399.572	0.551624	3.87322559508286e-06	3.1118320403069e-05
Nup107	FBgn0027868	505.819	0.514004	3.87530935705654e-06	3.1118320403069e-05
CG30196	FBgn0050196	16.9815	-1.99559	3.90294958574746e-06	3.13179781126621e-05
dah	FBgn0015926	13.4744	2.35723	3.95385213192015e-06	3.1703880420983e-05
Atg5	FBgn0029943	461.902	0.695333	3.98059396055415e-06	3.18956399594971e-05
shd	FBgn0003388	96.6332	-2.3474	4.02115102539851e-06	3.2197747245242e-05
RpLP0	FBgn0000100	41106.9	-0.709547	4.07029429879719e-06	3.2568127857468e-05
Tehao	FBgn0026760	896.231	-1.1342	4.07482299721956e-06	3.25812565943523e-05
CG9547	FBgn0031824	824.035	-0.651135	4.18141082069499e-06	3.3409827818046e-05
Lip4	FBgn0032264	683.004	-1.18664	4.2033162732912e-06	3.35610857716003e-05
Ibf2	FBgn0037669	117.919	1.1702	4.25561837359915e-06	3.39546580558314e-05
Hel25E	FBgn0014189	2370.72	0.391705	4.4035388317725e-06	3.51100530742455e-05
CG10433	FBgn0034638	476.375	1.12783	4.42117430460699e-06	3.52257687179209e-05
CG15021	FBgn0035544	18.5364	-2.70355	4.42541391540684e-06	3.52346646391108e-05
l(2)k09913	FBgn0021979	3441.32	-0.772909	4.48061716622303e-06	3.56490288218111e-05
CG14868	FBgn0038330	67.8073	-0.905884	4.4870753671475e-06	3.56752532009571e-05
CG4562	FBgn0038740	25629.2	-1.19523	4.49755883202467e-06	3.57334216499312e-05
ClC-b	FBgn0033755	1061.87	0.724277	4.51974872286842e-06	3.58844511551031e-05
ppk6	FBgn0034489	16.134	-2.21104	4.52653196229044e-06	3.59130334729682e-05
CG42673	FBgn0261555	178.835	0.950399	4.56564024877688e-06	3.61978589505978e-05
CG5348	FBgn0034156	4.34614	-3.39717	4.58414353338379e-06	3.63190360559241e-05
RpII15	FBgn0004855	424.696	0.596221	4.60326711609777e-06	3.64449541079404e-05
SMC2	FBgn0027783	104.828	0.98287	4.61126880020005e-06	3.64827030882587e-05
CG16775	FBgn0036767	12001.7	-1.3622	4.62384301395928e-06	3.65565500234678e-05
CR41590	FBgn0085807	68.0138	-1.79913	4.63697161114351e-06	3.66346734712333e-05
csul	FBgn0015925	288.001	0.607438	4.65666666285258e-06	3.67645299442287e-05
Dsor1	FBgn0010269	581.927	0.662162	4.66827202576136e-06	3.68303811151326e-05
CG12926	FBgn0033437	2142.64	0.685534	4.69624641354824e-06	3.70251935972406e-05
Pbp95	FBgn0037540	85.2995	0.936391	4.69983642661937e-06	3.70276219030166e-05
ssp	FBgn0036248	374.742	0.557966	4.73999393914124e-06	3.73179425131832e-05
CG8369	FBgn0040532	84.0068	1.42269	4.7470011851609e-06	3.73470483758615e-05
MtnD	FBgn0053192	3887.62	1.63562	4.76236390697504e-06	3.74418045982526e-05
Mis12	FBgn0035725	71.5111	-1.08766	4.81846475171245e-06	3.78564897833007e-05
CG31741	FBgn0051741	30.4688	-3.09092	4.88614852845936e-06	3.83615363243414e-05
CG4666	FBgn0029838	170.012	-1.29042	4.97130199191783e-06	3.90029409407629e-05
mthl8	FBgn0052475	286.502	0.841456	4.98220273454246e-06	3.90613003829799e-05
CG30496	FBgn0050496	201.656	0.678005	5.02420913917582e-06	3.93632829917928e-05
CG11426	FBgn0037166	537.679	-0.883874	5.034786343779e-06	3.9418778300149e-05
La	FBgn0011638	2205.29	1.0172	5.08025246908351e-06	3.97471625216367e-05
CG31198	FBgn0051198	147139	-0.736213	5.10771577134463e-06	3.99343377216286e-05
CG10194	FBgn0032790	478.534	-0.55759	5.16501024616278e-06	4.0354325205823e-05
corn	FBgn0259173	1279.28	-0.758849	5.17331708082115e-06	4.03912548829234e-05
Oatp33Eb	FBgn0032435	5595.16	-0.534978	5.17700239973822e-06	4.03920754314292e-05
CG10688	FBgn0036300	1582.96	-0.677621	5.19512194858729e-06	4.05054359529798e-05
GstE1	FBgn0034335	537.645	-0.975896	5.2110167519779e-06	4.05840249666272e-05
danr	FBgn0039283	9.40733	-2.5138	5.2123960447299e-06	4.05840249666272e-05
CG4577	FBgn0031306	676.924	1.14987	5.23396548476539e-06	4.07238611028436e-05
mod(mdg4)	FBgn0002781	912.912	0.42296	5.28095523471443e-06	4.10611557257396e-05
RpS27A	FBgn0003942	31692.3	-0.702734	5.29681440649756e-06	4.11561020207338e-05
CG34370	FBgn0085399	10.5207	-2.04819	5.35462657241384e-06	4.15766668891762e-05
ASPP	FBgn0034606	139.418	-0.636154	5.40063334052122e-06	4.19050518210182e-05
CG6171	FBgn0026737	353.204	1.09699	5.46244022452804e-06	4.23264083881355e-05
CG11307	FBgn0037106	96.9259	0.884261	5.46221360979683e-06	4.23264083881355e-05
Smyd4-1	FBgn0033427	156.56	0.74853	5.49251890093474e-06	4.25010961867941e-05
CG8155	FBgn0034009	461.202	0.57501	5.48974951565341e-06	4.25010961867941e-05
Nup75	FBgn0034310	364.102	0.492231	5.55963381490761e-06	4.29909449621574e-05
Rab40	FBgn0030391	368.101	0.688424	5.57232539691764e-06	4.30595720054964e-05
Ubc4	FBgn0015321	1119.26	0.469891	5.58806450044935e-06	4.30926477744837e-05
Pomp	FBgn0032884	1244.24	0.601657	5.5860934249386e-06	4.30926477744837e-05
CG9747	FBgn0039754	60.8669	1.18388	5.58166538056102e-06	4.30926477744837e-05
CG15435	FBgn0031608	94.8433	0.988224	5.68111109091262e-06	4.37802563713635e-05
CG7927	FBgn0027549	1805.72	-0.597497	5.69499283305254e-06	4.38572758651869e-05
Pex1	FBgn0013563	823.94	-0.709769	5.72419652005694e-06	4.40521044606292e-05
CR40640	FBgn0085759	2666.6	-1.54786	5.73953220578182e-06	4.41400152321953e-05
CG4465	FBgn0038750	26.681	-1.75476	5.81378945038072e-06	4.46806352719314e-05
ea	FBgn0000533	53.7308	-1.35497	5.89282064815051e-06	4.52571834938285e-05
GalNAc-T2	FBgn0030930	418.171	0.654415	5.9061040290773e-06	4.52794547951377e-05
CG12519	FBgn0036872	3.55957	-3.34564	5.90776081000201e-06	4.52794547951377e-05
CG32641	FBgn0052641	132.935	0.824962	5.90746483938791e-06	4.52794547951377e-05
CG18004	FBgn0033566	218.125	0.694375	6.1686164748162e-06	4.72466606034463e-05
fz3	FBgn0027343	303.205	-0.600703	6.18992382144903e-06	4.73776937269932e-05
CG9399	FBgn0037715	1493.9	-0.577903	6.22089076248376e-06	4.7582433615147e-05
Rpt4	FBgn0028685	2238.51	0.520642	6.46296780276878e-06	4.9400543869131e-05
Nup205	FBgn0031078	642.355	0.541338	6.5086605814149e-06	4.97161196205301e-05
CG14353	FBgn0036771	149.238	0.81206	6.51453602531175e-06	4.97273311485569e-05
Mtr3	FBgn0036916	315.798	0.583862	6.53271399799054e-06	4.98323727689853e-05
CG3209	FBgn0034971	7646.84	-0.777562	6.54849642204751e-06	4.99190112388784e-05
ImpL2	FBgn0001257	869.842	1.58108	6.59340864954341e-06	5.02274384768054e-05
CSN7	FBgn0028836	582.394	0.509375	6.6858277341314e-06	5.08971042486305e-05
MED25	FBgn0038760	178.608	-0.718081	6.71369798623038e-06	5.10748082809515e-05
CR41509	FBgn0085792	3.38769	-3.32422	6.74911576610299e-06	5.13096523404137e-05
Npc2f	FBgn0039154	2562.31	-1.82985	6.7787038703005e-06	5.14998902792796e-05
form3	FBgn0053556	238.921	-0.928752	6.80088993364733e-06	5.16336744491313e-05
CG4839	FBgn0032187	3263.59	-0.985034	6.86163307621087e-06	5.20598146373982e-05
CG16989	FBgn0025621	1469.99	-0.585276	6.94366149308695e-06	5.26467667775585e-05
CstF-50	FBgn0039867	151.371	0.73936	7.06493785698347e-06	5.3530308195089e-05
Zip88E	FBgn0038312	226.883	-0.592383	7.10533184032089e-06	5.38002374647653e-05
CG4585	FBgn0025335	1228	-0.389914	7.12316777099338e-06	5.38991138781672e-05
Srp54	FBgn0024285	1227.7	0.507579	7.21923388883636e-06	5.45894079985602e-05
yellow-k	FBgn0036504	10.0247	2.60329	7.2242848784085e-06	5.45910127248524e-05
CG5381	FBgn0032218	1110.45	-0.435257	7.25223313801587e-06	5.47655249418307e-05
sel	FBgn0263260	3577.19	-1.21697	7.38266113815168e-06	5.57131658599514e-05
CG4880	FBgn0030803	203.236	-0.737626	7.50115159872388e-06	5.65695135941195e-05
CCAP-R	FBgn0039396	16.1762	2.12579	7.5072817082862e-06	5.65779240032631e-05
IscU	FBgn0037637	2788.1	0.669123	7.53432762413316e-06	5.67438479676037e-05
CG6891	FBgn0030955	2790.65	0.998949	7.56846341286748e-06	5.69629114235963e-05
CG15601	FBgn0030673	79.7926	0.889477	7.65939894339282e-06	5.76088925862385e-05
Pi3K59F	FBgn0015277	820.296	-0.447963	7.70813366804527e-06	5.79368181498246e-05
CG15423	FBgn0031580	4003.09	-1.06118	7.74890033730566e-06	5.82044564617061e-05
ITP	FBgn0035023	419.708	1.44071	7.78006532415757e-06	5.8388731251976e-05
beta-Man	FBgn0037215	5204.26	-0.948399	7.78895945171281e-06	5.8388731251976e-05
CG33695	FBgn0052831	136.549	0.744469	7.7848161721261e-06	5.8388731251976e-05
Cyp9f2	FBgn0038037	8366.88	-1.04598	7.85873689307296e-06	5.8872688995783e-05
CG32512	FBgn0052512	1352.05	-1.18708	8.02166043531992e-06	6.00533331328993e-05
lds	FBgn0002542	159.334	0.765453	8.05220770523996e-06	6.0242047301404e-05
CG11899	FBgn0014427	656.868	1.09452	8.06957806229419e-06	6.02521374578445e-05
mRpL38	FBgn0030552	718.054	0.43687	8.06402863749898e-06	6.02521374578445e-05
Dys	FBgn0260003	3309.36	-0.610157	8.06585843341511e-06	6.02521374578445e-05
bmm	FBgn0036449	3971.45	-1.15706	8.23995128540536e-06	6.14835518531371e-05
CG9344	FBgn0034564	307.847	1.12905	8.25740974046217e-06	6.15730976152639e-05
gkt	FBgn0260817	113.25	0.873774	8.36704694910759e-06	6.23494211887925e-05
CG18769	FBgn0042185	137.881	-1.1275	8.53129727433318e-06	6.3531416401998e-05
RhoGAP19D	FBgn0031118	1735.28	-0.797849	8.6523979267203e-06	6.43482883383378e-05
Fmo-1	FBgn0034943	31.8777	-2.10587	8.64685259786541e-06	6.43482883383378e-05
CG13126	FBgn0032168	280.874	0.665923	8.69662752505851e-06	6.46346190630501e-05
CG11077	FBgn0039930	473.285	-0.912733	8.76237910885177e-06	6.50804220579761e-05
Xbp1	FBgn0021872	14197.4	-0.421338	8.89698591476336e-06	6.60367072962896e-05
GstE4	FBgn0063496	4.39042	-3.01751	8.93229681433658e-06	6.62552088490107e-05
CaMKII	FBgn0264607	1389.77	0.605365	9.00322028477787e-06	6.6737405553787e-05
CG1090	FBgn0037238	9.90845	-2.17928	9.09447570302872e-06	6.73493549211399e-05
CR42195	FBgn0085828	16.2051	-1.84615	9.09771466936866e-06	6.73493549211399e-05
RpS26	FBgn0261597	32264.8	-0.68852	9.2905484618103e-06	6.87317821286189e-05
Cp110	FBgn0031191	63.3242	1.07258	9.33052582683013e-06	6.8982301689579e-05
CG9752	FBgn0034614	43.5166	1.88421	9.4150205296522e-06	6.95614024987139e-05
RpS3	FBgn0002622	42967.5	-0.793485	9.44391685205015e-06	6.97292342439985e-05
Alp4	FBgn0016123	1247.52	-1.92102	9.48586731221413e-06	6.99931687484629e-05
snRNP-U1-70K	FBgn0016978	644.439	0.724819	9.51207044192848e-06	7.01205699862552e-05
CG13202	FBgn0033623	54.6792	-1.74644	9.51556396463009e-06	7.01205699862552e-05
Peritrophin-15b	FBgn0040958	296.212	-2.02719	9.58019042851115e-06	7.05507235081349e-05
CDase	FBgn0039774	4299.6	-1.21609	9.65190402777948e-06	7.10324730863719e-05
Skeletor	FBgn0262717	8.24311	-2.60574	9.73332970989585e-06	7.1585023329234e-05
CG8089	FBgn0033993	67.6789	1.09451	9.76596797456025e-06	7.17782740644878e-05
slo	FBgn0003429	483.173	-2.13672	9.85371260499204e-06	7.23760322978647e-05
skap	FBgn0037643	6955.55	0.488583	9.92760784807637e-06	7.28713544189965e-05
RpL4	FBgn0003279	38580	-0.775342	9.93650578801161e-06	7.28892446686262e-05
CG7656	FBgn0036516	848.426	0.60089	1.00884574064405e-05	7.39558001685915e-05
Blm	FBgn0002906	74.8719	1.05818	1.01541934519503e-05	7.43893574837034e-05
CG5316	FBgn0038704	391.643	0.479854	1.01846107846865e-05	7.45154207995023e-05
HDAC11	FBgn0051119	100.524	-0.974302	1.01833315565628e-05	7.45154207995023e-05
CR45314	FBgn0266853	177.299	1.35018	1.02443345520865e-05	7.49038123244591e-05
Gld	FBgn0001112	31.2179	-2.06346	1.03007046486068e-05	7.52184788644546e-05
lectin-33A	FBgn0040096	18.6586	-2.11626	1.02980845869583e-05	7.52184788644546e-05
CG3430	FBgn0031875	90.3902	1.05593	1.04257385654745e-05	7.60822655211404e-05
odd	FBgn0002985	1713.72	-1.12575	1.04706100651449e-05	7.63603249870487e-05
Tsp29Fa	FBgn0032074	14114.2	-0.727926	1.05294012389476e-05	7.67394733706759e-05
Lerp	FBgn0051072	7926.41	-0.78356	1.06304334987207e-05	7.74257913057242e-05
CG6766	FBgn0032398	3336.56	-0.662533	1.06614015444508e-05	7.7601246596448e-05
Tcp-1zeta	FBgn0027329	3390.71	0.781472	1.07943601657673e-05	7.84677650709963e-05
P5cr-2	FBgn0038516	1258.44	-0.900712	1.07921890847854e-05	7.84677650709963e-05
CG6683	FBgn0035902	72.1503	0.951317	1.08681680296939e-05	7.89025205737976e-05
CG7248	FBgn0036229	9.53808	2.685	1.08751479783952e-05	7.89025205737976e-05
CR45009	FBgn0266361	22.8696	-1.67106	1.08711319765582e-05	7.89025205737976e-05
CG12263	FBgn0034346	648.797	0.485357	1.10089412880619e-05	7.9821899493518e-05
CG13078	FBgn0032809	110.597	-1.99052	1.10310013623672e-05	7.99304800065682e-05
RpL17	FBgn0029897	23974.8	-0.66512	1.10822259589086e-05	8.02501112120709e-05
Amph	FBgn0027356	1087.22	-1.11767	1.11411649644598e-05	8.0625159159099e-05
CG11309	FBgn0037070	7008.5	-0.910817	1.14918347218968e-05	8.31095380336152e-05
CG9667	FBgn0037550	253.722	0.652372	1.1550020552104e-05	8.34768301530025e-05
CG17807	FBgn0034748	305.189	-0.673881	1.16087597328842e-05	8.38476487236874e-05
Tsp42Eq	FBgn0033138	2921.81	-0.514244	1.16204892100677e-05	8.38786687575075e-05
CG6597	FBgn0036967	506.303	0.428911	1.17124760894256e-05	8.44885903074805e-05
CG11659	FBgn0038731	8.72077	-2.48333	1.18076082502815e-05	8.51204065684832e-05
CG10038	FBgn0038013	365.729	0.525283	1.1959240517041e-05	8.61584620135738e-05
CG12493	FBgn0035571	241.482	-1.15843	1.1969013428064e-05	8.61738414137955e-05
Map60	FBgn0010342	151.322	0.749052	1.21164046253012e-05	8.71793858307703e-05
CG15107	FBgn0041702	112.492	0.795868	1.21592908998579e-05	8.74321988095585e-05
CG8149	FBgn0037700	545.25	0.523973	1.22619019959289e-05	8.81138715401716e-05
ball	FBgn0027889	91.78	0.990918	1.2316346734244e-05	8.84487739374547e-05
Rel	FBgn0014018	5510.31	-1.85665	1.23714523173537e-05	8.87879930307787e-05
CG10139	FBgn0033951	260.738	0.72286	1.24668386432913e-05	8.94156856793468e-05
RpS4	FBgn0011284	37592.4	-0.677006	1.24877799915353e-05	8.95089795835457e-05
CG30054	FBgn0050054	47.822	1.06328	1.25248419940518e-05	8.97176300805665e-05
CG9601	FBgn0037578	167.205	0.612539	1.25999403795698e-05	9.01983041638999e-05
ck	FBgn0000317	1041.02	-0.771346	1.27542812976079e-05	9.12452768545417e-05
gammaTub23C	FBgn0260639	139.218	0.872531	1.28451176156507e-05	9.18368928642404e-05
Mmp2	FBgn0033438	227.865	1.55877	1.28854916162256e-05	9.20672048222022e-05
RhoU	FBgn0083940	61.2887	-0.96131	1.29326644522728e-05	9.23457723737604e-05
CG5704	FBgn0026570	656.478	-0.803742	1.30319466269599e-05	9.29958392443777e-05
foxo	FBgn0038197	1883.49	-0.58525	1.30482211599006e-05	9.30531170202269e-05
ncd	FBgn0002924	74.58	1.37588	1.31102869599688e-05	9.3436675604781e-05
eIF2B-delta	FBgn0034858	765.191	0.488843	1.31660869953421e-05	9.37602668202137e-05
Trax	FBgn0038327	403.943	0.473731	1.31723119048075e-05	9.37602668202137e-05
CG14073	FBgn0036814	697.558	0.796646	1.32301225894718e-05	9.41123852802148e-05
CR43432	FBgn0263380	9.83044	-2.08129	1.32402060067842e-05	9.41247663317832e-05
Zasp52	FBgn0265991	2377.89	0.762971	1.3433242545899e-05	9.54369284652598e-05
CG10055	FBgn0037482	578.068	0.485022	1.35075953789155e-05	9.58444597892609e-05
CG32196	FBgn0052196	195.208	-0.942444	1.35019318176454e-05	9.58444597892609e-05
Spn88Eb	FBgn0038299	18.5386	2.46481	1.35419953387445e-05	9.60281529929072e-05
Rab9	FBgn0032782	804.763	-0.351589	1.35847079901003e-05	9.62705248393914e-05
Ugt86Dd	FBgn0040256	1818.78	-1.49676	1.36369160983364e-05	9.65798414447155e-05
CG42494	FBgn0260026	43.2212	-1.56315	1.36909306421607e-05	9.68408021974024e-05
Unr	FBgn0263352	2770.65	-0.52709	1.36869091399087e-05	9.68408021974024e-05
CG10341	FBgn0032701	852.009	-0.944782	1.3720640419721e-05	9.69901411123382e-05
RpL28	FBgn0035422	17596	-0.710776	1.41470718643918e-05	9.9941931605553e-05
I-2	FBgn0028429	586.698	0.473387	1.42603221640299e-05	0.000100679
lab	FBgn0002522	272.121	-0.91542	1.42790973214302e-05	0.000100748
heix	FBgn0028375	716.998	0.611237	1.43072521768601e-05	0.000100884
CG7992	FBgn0031004	4107.37	-0.848086	1.4611245994173e-05	0.000102963
CG34445	FBgn0085474	37.1026	-1.39697	1.46850716457352e-05	0.000103419
Sodh-1	FBgn0024289	999.459	-1.61114	1.46957378939075e-05	0.000103429
CG7860	FBgn0030653	67.3555	-1.7667	1.47489138156901e-05	0.000103739
spz	FBgn0003495	35.8077	1.66074	1.50926078723364e-05	0.000106071
Sox14	FBgn0005612	934.058	1.15893	1.51086262772086e-05	0.000106071
Hipk	FBgn0035142	1868.76	-1.10158	1.51073539589881e-05	0.000106071
CG32638	FBgn0052638	1016.05	-0.600047	1.51643438413363e-05	0.000106396
Cyp6a17	FBgn0015714	1056.82	0.92872	1.52784794916189e-05	0.00010713
CG13917	FBgn0035237	1105.35	-1.08344	1.53310965269491e-05	0.000107365
Cyp12e1	FBgn0037817	225.209	-1.00214	1.53304083249235e-05	0.000107365
upd2	FBgn0030904	17.8193	2.22513	1.54324867286978e-05	0.000107941
Ada2b	FBgn0037555	587.894	0.503504	1.54321177405994e-05	0.000107941
Gclc	FBgn0040319	8977.85	-1.0777	1.54645452827607e-05	0.000108099
CG4825	FBgn0037010	722.454	0.569994	1.55610506701814e-05	0.000108706
CG1544	FBgn0039827	117.128	-1.11866	1.55717161139042e-05	0.000108713
RpL24-like	FBgn0037899	2449.59	-1.1695	1.56361731346169e-05	0.000109095
eIF4AIII	FBgn0037573	1030.68	0.389286	1.58107908112838e-05	0.000110246
clu	FBgn0034087	2851.55	0.692558	1.58306808896441e-05	0.000110316
smp-30	FBgn0038257	5567.93	-2.5073	1.58583737260419e-05	0.000110441
GstE9	FBgn0063491	2325.55	-1.23871	1.60485403374544e-05	0.000111696
Rpb7	FBgn0051155	251.137	0.820331	1.63208142878527e-05	0.000113521
Decay	FBgn0028381	7089.45	0.400271	1.64135087799646e-05	0.000114096
CG7744	FBgn0034447	359.744	0.540104	1.65268482953311e-05	0.000114802
sud1	FBgn0265189	259.805	0.521735	1.65355133123444e-05	0.000114802
bgm	FBgn0027348	3691.02	-0.86687	1.66086980453509e-05	0.000115239
CG15221	FBgn0030331	51.424	-1.77579	1.66928412837839e-05	0.000115681
CR45215	FBgn0266742	141.406	-0.829249	1.66906864461024e-05	0.000115681
CHOp24	FBgn0029709	2575.23	-0.785197	1.67615495794387e-05	0.000116086
CCHa1	FBgn0038199	302.319	1.16811	1.67778728286342e-05	0.000116128
Psf1	FBgn0035194	56.3082	1.05156	1.72195708167033e-05	0.000119112
HIP-R	FBgn0029676	328.739	0.539486	1.72536300593901e-05	0.000119274
Msh6	FBgn0036486	85.3778	1.25274	1.73867677425633e-05	0.000120121
CG15202	FBgn0030271	44.2748	-1.3096	1.74732956736254e-05	0.000120645
CR42874	FBgn0262148	60.2722	1.93928	1.7631421035362e-05	0.000121662
RpL31	FBgn0025286	22270.5	-0.611022	1.76544581006006e-05	0.000121696
CG15822	FBgn0035308	100.799	-1.1323	1.76578331127916e-05	0.000121696
Drip	FBgn0015872	1769.22	-0.757012	1.7740878855009e-05	0.000122044
Irk2	FBgn0039081	1628.7	-1.11116	1.77198680296217e-05	0.000122044
bwa	FBgn0045064	750.222	0.899089	1.77318197757309e-05	0.000122044
CaBP1	FBgn0025678	9225.56	-0.876857	1.81175563447121e-05	0.000124484
Oseg4	FBgn0035264	1593.13	1.35274	1.81067724166913e-05	0.000124484
Hlc	FBgn0001565	1451.58	-0.964778	1.81387026292953e-05	0.000124553
Takl2	FBgn0039015	1152.12	-0.974276	1.82739087622275e-05	0.000125405
Fur2	FBgn0004598	272.437	0.65771	1.83732946258189e-05	0.000126011
Rpn10	FBgn0015283	2465.8	0.398037	1.84582807706464e-05	0.000126466
CG6051	FBgn0039492	2364.72	-1.04278	1.84733361780797e-05	0.000126466
CG15529	FBgn0039748	128.039	1.16563	1.84698014705253e-05	0.000126466
Adh	FBgn0000055	9.2493	-2.30143	1.85877092393606e-05	0.000127172
CG7255	FBgn0036493	1615.55	-0.892423	1.86218854830629e-05	0.000127329
CG12541	FBgn0029930	33.1941	-1.39955	1.86770845712434e-05	0.000127629
CG8417	FBgn0037744	1623.05	-0.351247	1.87064516637259e-05	0.000127683
28SrRNA-Psi:CR41609	FBgn0085819	38.8495	-1.78131	1.87076503109003e-05	0.000127683
Wsck	FBgn0046685	176.417	1.20824	1.87506759259945e-05	0.000127899
by	FBgn0000244	1508.94	-0.473564	1.87690052747212e-05	0.000127904
RpL10Ab	FBgn0036213	37392.7	-0.771549	1.8774091543126e-05	0.000127904
mamo	FBgn0267033	1272.31	-0.6411	1.89294201445124e-05	0.000128885
Incenp	FBgn0260991	53.4904	1.55746	1.92502384802175e-05	0.00013099
Spn27A	FBgn0028990	332.331	1.26547	1.94431107544441e-05	0.000132223
Rcd2	FBgn0037012	1027.19	-0.663971	1.96997407528532e-05	0.000133887
CG2641	FBgn0037518	200.107	0.659409	1.97205765586285e-05	0.000133948
AnxB10	FBgn0000084	306.094	1.18853	1.97720451748499e-05	0.000134217
zuc	FBgn0261266	20.5503	1.5865	2.02218557393093e-05	0.000137188
bol	FBgn0011206	376.867	-1.10249	2.04763447381533e-05	0.000138831
jp	FBgn0032129	728.95	0.95309	2.05218192950689e-05	0.000139055
cv	FBgn0000394	149.392	1.01645	2.06099769202852e-05	0.000139569
GAPsec	FBgn0035916	281.626	1.11186	2.10774261371743e-05	0.000142563
RpL6	FBgn0039857	28391.7	-0.761224	2.10712038165923e-05	0.000142563
CG3984	FBgn0038291	28.894	2.59428	2.11305509377101e-05	0.000142837
CG12207	FBgn0038220	2193.01	-0.742695	2.15540124752076e-05	0.000145612
Trip1	FBgn0015834	4747.88	-0.677049	2.16091803809842e-05	0.000145898
Ir76a	FBgn0260874	69.4243	0.912602	2.1725673146276e-05	0.000146596
Ufd1-like	FBgn0036136	872.222	0.448117	2.17696948400865e-05	0.000146806
CG33107	FBgn0053107	111.605	1.08545	2.18124004372098e-05	0.000147006
alphaTub84B	FBgn0003884	28011	0.487632	2.19607881962235e-05	0.000147917
Doa	FBgn0265998	1782.47	-0.449	2.20941913445256e-05	0.000148727
RpL27A	FBgn0261606	41275.8	-0.829008	2.21295788769352e-05	0.000148876
CG11570	FBgn0036230	12.0699	-2.41445	2.2187527303632e-05	0.000149177
ced-6	FBgn0029092	242.949	-1.14783	2.23310435962397e-05	0.000150053
CG42684	FBgn0261570	1101.09	-0.481074	2.25447942536448e-05	0.000151399
CG13004	FBgn0030797	117.075	-1.32241	2.26704309021114e-05	0.000152152
CG1440	FBgn0030038	1959.3	0.454719	2.27888501533846e-05	0.000152856
Cyp317a1	FBgn0033982	619.477	0.690241	2.28924387402325e-05	0.00015346
Cyp6a14	FBgn0033302	373.181	-0.899336	2.32932348487442e-05	0.000156054
Rab32	FBgn0002567	1787.27	-0.966364	2.34549851320049e-05	0.000157044
RpL14	FBgn0017579	23435.8	-0.636836	2.37310787815453e-05	0.000158798
fusl	FBgn0031702	89.3549	-1.54537	2.37616508902747e-05	0.000158814
CG18577	FBgn0037870	906.993	-1.36518	2.37546631815072e-05	0.000158814
CG10424	FBgn0036848	600.747	0.494875	2.38913330956699e-05	0.000159587
TAF1C-like	FBgn0034631	305.018	-0.470673	2.39807951873805e-05	0.000160027
RpL13A	FBgn0037351	27729.8	-0.597996	2.39856598148162e-05	0.000160027
e(r)	FBgn0011586	712.517	0.529102	2.41704209815629e-05	0.000161165
Cyp6a8	FBgn0013772	54.7327	1.3845	2.42189141411369e-05	0.000161393
mbf1	FBgn0262732	2903.5	0.464099	2.44334799708113e-05	0.000162726
sti	FBgn0002466	66.1503	2.20639	2.46179651154994e-05	0.000163858
Hex-C	FBgn0001187	1502.65	-0.779115	2.52597109036898e-05	0.000168031
CG5521	FBgn0039466	1054.34	0.655563	2.53227763708643e-05	0.000168351
Sytalpha	FBgn0261089	106.695	1.24327	2.53713863819933e-05	0.000168575
CG5946	FBgn0036211	1408.31	-0.475268	2.55451580984571e-05	0.00016963
mars	FBgn0033845	53.0136	1.26947	2.5913318439298e-05	0.000171973
CG12384	FBgn0033624	3010.57	-0.466594	2.6022968691477e-05	0.000172599
CG43187	FBgn0262816	377.775	1.47846	2.6048481287169e-05	0.000172667
CG15865	FBgn0015336	1516.89	-0.851859	2.6200498691581e-05	0.000173369
Mob2	FBgn0259481	1864.31	-0.610806	2.61981322053042e-05	0.000173369
CR44892	FBgn0266197	83.1786	-0.826505	2.61755527398286e-05	0.000173369
Dhod	FBgn0000447	839.848	-0.498286	2.62426749685518e-05	0.000173522
CG8358	FBgn0037727	66.1477	-1.43427	2.62544028772634e-05	0.000173522
Itp-r83A	FBgn0010051	1155.68	-0.42946	2.67240156229485e-05	0.000176522
CG34356	FBgn0085385	19.6198	2.00827	2.68211863826016e-05	0.000177061
E(var)3-9	FBgn0260243	279.387	0.58425	2.70769564801617e-05	0.000178645
Tango7	FBgn0033902	4810.39	-0.947633	2.74444122232962e-05	0.000180963
Cdk1	FBgn0004106	46.8581	2.09217	2.76898863843945e-05	0.000182475
CG14323	FBgn0038529	6.35972	-2.8168	2.80959851784621e-05	0.000185043
CG7154	FBgn0031947	416.371	0.608609	2.84197494612569e-05	0.000187066
Nprl3	FBgn0036397	238.27	0.641417	2.84460942689524e-05	0.000187131
CR44938	FBgn0266243	43.7705	1.07428	2.84716298635085e-05	0.000187189
TfIIS	FBgn0010422	550.856	0.438155	2.85741388870854e-05	0.000187754
CG1968	FBgn0033401	965.667	-0.504573	2.87564178928057e-05	0.000188842
CG14995	FBgn0035497	285.485	0.634128	2.88915020160998e-05	0.000189618
Cul1	FBgn0015509	2130.85	0.409445	2.9141248646044e-05	0.000191146
Caf1-55	FBgn0263979	634.942	0.629303	2.9227252804274e-05	0.000191599
CG11679	FBgn0030678	333.852	0.612727	2.93236973628103e-05	0.00019212
LTV1	FBgn0027525	1753.51	-0.917005	2.96635801877865e-05	0.000194234
betaTry	FBgn0010357	125265	-1.29428	3.01092730160332e-05	0.000197038
Elp2	FBgn0033540	552.811	-0.655787	3.0208726672369e-05	0.000197574
CG4408	FBgn0039073	17.4358	1.98121	3.03505870064461e-05	0.000198387
Eb1	FBgn0027066	1564.17	0.36944	3.04389767545858e-05	0.000198734
CG12264	FBgn0032393	1256.32	0.450946	3.04353038980684e-05	0.000198734
CG5181	FBgn0031909	311.467	0.617737	3.09069895296486e-05	0.000201673
Shc	FBgn0015296	601.749	0.683072	3.12778752626903e-05	0.000203975
RpS15	FBgn0034138	35319.5	-0.687897	3.13875764702193e-05	0.000204572
mura	FBgn0037705	1024.96	-0.678542	3.15667312452616e-05	0.000205621
CG4822	FBgn0031220	92.8586	-1.82922	3.16629548397872e-05	0.000206129
SCOT	FBgn0035298	1222.09	-0.603084	3.1972414879215e-05	0.000208024
Psn	FBgn0019947	1634.54	0.708933	3.22534553357028e-05	0.000209731
hppy	FBgn0263395	1217.77	-0.669876	3.23575831639896e-05	0.000210287
CG10973	FBgn0036306	530.075	0.898012	3.24237603639574e-05	0.000210596
Rpn7	FBgn0028688	2013.22	0.437953	3.27855622540331e-05	0.000212823
Myd88	FBgn0033402	1670.96	-0.536777	3.29155667203308e-05	0.000213544
spdo	FBgn0260440	36.7838	1.44028	3.32837569781169e-05	0.000215809
gwl	FBgn0260399	20.0902	2.08852	3.33773757685202e-05	0.000216292
DppIII	FBgn0037580	3364.56	0.52467	3.34514309323257e-05	0.000216647
CG4004	FBgn0030418	261.553	0.645511	3.35097176768989e-05	0.0002169
brk	FBgn0024250	758.464	1.02834	3.35511313836534e-05	0.000217043
CR12628	FBgn0042701	65.7654	1.08034	3.35930399301263e-05	0.00021719
CG8397	FBgn0034066	1665.22	-0.421971	3.38304331726024e-05	0.0002186
Oatp58Da	FBgn0050277	458.484	-1.78802	3.39485189807912e-05	0.000219237
CG13449	FBgn0036520	12.6613	-1.75226	3.40600963852606e-05	0.000219832
CG11275	FBgn0034706	95.016	-1.02096	3.44397109317416e-05	0.000222155
out	FBgn0259834	3593.97	-0.773316	3.45701220890726e-05	0.000222869
sli	FBgn0264089	1225.9	1.02527	3.4671721702397e-05	0.000223396
RpS7	FBgn0039757	37471.6	-0.512324	3.52829612656894e-05	0.000227148
Nhe2	FBgn0040297	2242.55	-0.749172	3.52942535861023e-05	0.000227148
SmF	FBgn0000426	291.518	0.912293	3.54487622874875e-05	0.000228012
Wdr82	FBgn0032030	447.219	0.482898	3.55624268126139e-05	0.000228613
Whamy	FBgn0037750	3028.58	-0.575841	3.57354244842887e-05	0.000229594
ORMDL	FBgn0037110	933.383	-0.480238	3.68331549466962e-05	0.000236512
RpS12	FBgn0260441	25655.6	-0.854823	3.69425926233394e-05	0.00023708
CG3662	FBgn0031285	10622	-0.538317	3.69784185881798e-05	0.000237175
CG31495	FBgn0051495	195.169	0.580927	3.70263495801648e-05	0.000237347
eIF6	FBgn0034915	1143.48	0.887122	3.76080528918348e-05	0.000240939
CycK	FBgn0025674	923.365	0.441662	3.79316487642878e-05	0.000242737
nonC	FBgn0263968	1627.89	-0.620092	3.79284827993776e-05	0.000242737
msd5	FBgn0035210	34.9064	1.26432	3.82295865309639e-05	0.000244395
CG45057	FBgn0266417	1361.66	-0.807	3.82340902415919e-05	0.000244395
pim	FBgn0003087	11.2779	2.2007	3.83754604639169e-05	0.00024516
unc-104	FBgn0267002	959.193	-1.309	3.84840299208235e-05	0.000245714
RpL40	FBgn0003941	27772.1	-0.615073	3.85706524482317e-05	0.000246128
CG8036	FBgn0037607	9508.94	-0.953769	3.86136308439707e-05	0.000246263
Chmp1	FBgn0036805	1679.05	-0.599419	3.86450237088097e-05	0.000246324
Debcl	FBgn0029131	286.826	0.961952	3.87110788942201e-05	0.000246606
ND-ASHI	FBgn0029888	2110.61	-0.308163	3.87596109738407e-05	0.000246775
Sema-2a	FBgn0011260	677.682	1.0782	3.88797888791998e-05	0.000247401
larp	FBgn0261618	3374.53	-0.615973	3.92656693738776e-05	0.000249716
CR44458	FBgn0265651	9.30994	2.82281	3.93464467556189e-05	0.000250088
fzy	FBgn0001086	38.9555	1.66497	3.96179532818267e-05	0.000251672
CG13313	FBgn0035941	172.423	1.0169	3.98949505227283e-05	0.000253289
CG5525	FBgn0032444	4571.89	0.611116	3.99354239381556e-05	0.000253404
Dh31	FBgn0032048	278.923	1.22693	3.99697726106747e-05	0.000253479
Zwilch	FBgn0061476	41.6336	1.19197	4.00249155788065e-05	0.000253686
eIF4E-3	FBgn0265089	2.58102	-3.06588	4.01005428145573e-05	0.000254023
vls	FBgn0003978	208.076	0.547965	4.02438183743738e-05	0.000254787
pain	FBgn0060296	732.108	0.95615	4.10055988420521e-05	0.000259465
CG43920	FBgn0264541	19.3236	-2.48531	4.11168202919987e-05	0.000260022
blow	FBgn0004133	65.9344	-1.0224	4.11704641430514e-05	0.000260216
Cyp12c1	FBgn0036806	1550.56	-0.656101	4.18417155786159e-05	0.00026431
eca	FBgn0069242	773.92	-0.566887	4.19624647161476e-05	0.000264925
CG9992	FBgn0030744	219.903	0.723805	4.20546956545725e-05	0.000265358
CG7510	FBgn0036741	1357.44	-0.718867	4.25972112734458e-05	0.000268481
CG42268	FBgn0259163	1030.86	-0.535817	4.25791497450694e-05	0.000268481
wus	FBgn0030805	26.5457	1.68518	4.28490020805729e-05	0.000269918
SelG	FBgn0030350	953.705	-0.620298	4.32520058273081e-05	0.000272304
Prosalpha6	FBgn0250843	2242.79	0.532793	4.36275277670723e-05	0.000274515
Roc2	FBgn0044020	293.052	0.941556	4.41826340083358e-05	0.000277853
CG4511	FBgn0037843	596.73	0.552652	4.45548531194813e-05	0.000280038
Cyp309a1	FBgn0031432	1889.26	1.86494	4.49383840567295e-05	0.000282291
CG33080	FBgn0053080	3073.53	-1.02052	4.51156050195866e-05	0.000283247
sktl	FBgn0016984	1525.37	-0.522937	4.55734868769386e-05	0.000285962
CR40621	FBgn0085757	17.9389	-1.67492	4.5685080107095e-05	0.000286503
MTF-1	FBgn0040305	1715.3	-0.813712	4.57619491355924e-05	0.000286826
RfC3	FBgn0032244	131.307	0.836557	4.61965239733642e-05	0.000289236
RpL8	FBgn0261602	44490.4	-0.75594	4.61978243039676e-05	0.000289236
sc	FBgn0004170	22.9916	1.97915	4.62551370008723e-05	0.000289434
CG13793	FBgn0031935	41.7301	-1.49974	4.62980678384484e-05	0.000289543
Cadps	FBgn0053653	86.4944	0.891798	4.6436795693595e-05	0.000290249
scyl	FBgn0041094	10001.1	0.521496	4.64955683709922e-05	0.000290456
CG12970	FBgn0034047	191.532	2.20249	4.67881253091376e-05	0.00029196
CR43464	FBgn0263441	6.80354	2.35086	4.67863508058351e-05	0.00029196
Ras85D	FBgn0003205	1186.18	0.399191	4.70771766572997e-05	0.000293601
CG12006	FBgn0035464	374.514	0.630134	4.7260173468027e-05	0.00029458
CG31821	FBgn0051821	969.016	-0.884821	4.73127578193855e-05	0.000294745
nrv2	FBgn0015777	117.863	-0.887349	4.7591372316474e-05	0.00029599
l(2)k14505	FBgn0021856	644.298	0.40033	4.75395460635378e-05	0.00029599
CG8173	FBgn0030864	22.9007	1.50752	4.75914174292238e-05	0.00029599
CG8620	FBgn0040837	151.043	1.65765	4.79950788307011e-05	0.000298336
AnxB9	FBgn0000083	2502.12	0.824472	4.81358254821242e-05	0.000299047
Ref2	FBgn0032439	5.95533	2.77373	4.82156808912549e-05	0.000299378
Ptpa	FBgn0016698	267.692	0.559481	4.83977076026392e-05	0.000300343
CG4199	FBgn0025628	2671.28	-0.573067	4.90373355150455e-05	0.000304145
Npc2e	FBgn0051410	10527.4	2.55076	4.94473250305222e-05	0.000306519
CG32756	FBgn0052756	150.35	0.638431	4.95942778730807e-05	0.000307261
Mdr50	FBgn0010241	4339.1	-2.38078	4.96514835457681e-05	0.000307447
eIF-3p40	FBgn0022023	4878.82	-0.726496	4.9748276071129e-05	0.000307877
ox	FBgn0011227	1738.78	-0.499885	4.99469461443804e-05	0.000308937
CG2918	FBgn0023529	12439.5	-0.761231	5.01766556729124e-05	0.000310018
Cyp4ac2	FBgn0031694	41.324	-1.72045	5.01624254936929e-05	0.000310018
UK114	FBgn0086691	1462.43	-1.01518	5.02050997412202e-05	0.000310024
Snx16	FBgn0034265	335.524	0.612321	5.05015111963652e-05	0.000311684
CG4783	FBgn0038756	2575	-1.40897	5.06454317603409e-05	0.000312401
Inx7	FBgn0027106	4694.57	-0.382469	5.12887458435154e-05	0.000316196
gek	FBgn0023081	396.55	0.40915	5.16050698849771e-05	0.000317973
Gbs-70E	FBgn0036428	654.012	-0.911093	5.22641499291719e-05	0.000321858
shg	FBgn0003391	1651.36	0.675005	5.27644301713245e-05	0.000324762
TBCC	FBgn0051961	258.451	0.571087	5.3340674699656e-05	0.00032813
Dcr-2	FBgn0034246	2207.22	0.735355	5.42212517329418e-05	0.000333365
ERR	FBgn0035849	723.367	-0.539829	5.43668458585585e-05	0.000334078
RpL36A	FBgn0031980	19172	-0.753645	5.44353307425497e-05	0.000334317
DptB	FBgn0034407	105.091	2.90413	5.45709236093664e-05	0.000334967
SP2637	FBgn0034371	407.26	0.430407	5.47060691491374e-05	0.000335614
bor	FBgn0040237	1544.18	0.775731	5.52730551218175e-05	0.000338908
Cyp6a18	FBgn0039519	205.426	-2.11113	5.53245991414577e-05	0.00033904
Cyp49a1	FBgn0033524	277.879	-1.16904	5.6103742049651e-05	0.000343628
CG11141	FBgn0033177	495.301	-0.870463	5.69749081942924e-05	0.000348774
CG2841	FBgn0003159	3001.67	-0.830546	5.73315156548266e-05	0.000350767
CG15456	FBgn0040650	67.2821	-1.09576	5.76336418043366e-05	0.000352424
CG4629	FBgn0031299	214.816	-0.811629	5.78052666357052e-05	0.000353282
CG11227	FBgn0031139	37.6063	2.62305	5.79952667084799e-05	0.000354251
CG14339	FBgn0031301	7.5189	2.56708	5.80713651311231e-05	0.000354524
RpL7A	FBgn0014026	47427	-0.642116	5.81958841078001e-05	0.000354981
CG4269	FBgn0034741	107.025	1.75927	5.82090150526797e-05	0.000354981
Spt-I	FBgn0086532	2619.86	0.336061	5.83281968001705e-05	0.000355515
Sep2	FBgn0014029	1015.79	0.531613	5.8645446538769e-05	0.000357256
CG8083	FBgn0025709	6657.58	-1.37324	5.87038661493157e-05	0.000357419
Non1	FBgn0028473	10256.9	-1.21003	5.90966867938935e-05	0.000359616
CR45126	FBgn0266619	61.2577	1.09249	5.94292414873814e-05	0.000361445
CG17202	FBgn0038043	266	-0.542718	5.98051623253193e-05	0.000363536
mago	FBgn0002736	555.727	0.589533	6.02255669876804e-05	0.000365894
CG8034	FBgn0031011	2680.62	-0.862063	6.03942717092301e-05	0.000366721
CG13325	FBgn0033792	595.629	-1.76832	6.11486724537938e-05	0.000371102
CG31106	FBgn0051106	187.098	-2.10419	6.1320712951271e-05	0.000371946
CG14693	FBgn0037837	10.9684	-2.27044	6.14850965630368e-05	0.000372743
mad2	FBgn0035640	20.1873	1.7055	6.22903422367964e-05	0.000377422
CG9590	FBgn0038360	997.252	-0.424994	6.27330255358708e-05	0.0003799
Amy-d	FBgn0000078	10547.1	-1.10906	6.34278623432849e-05	0.000383902
Klp61F	FBgn0004378	66.5325	1.40387	6.34735682137208e-05	0.000383973
CG6401	FBgn0034270	118.065	0.691332	6.35802451682402e-05	0.000384206
Hs6st	FBgn0038755	152.511	-0.682151	6.3555477621326e-05	0.000384206
CG15141	FBgn0032635	178.895	0.708353	6.38079511003987e-05	0.000385375
Cap-D2	FBgn0039680	80.4444	0.919517	6.39662696450273e-05	0.000386125
vis	FBgn0033748	4.308	-2.69092	6.43414630634963e-05	0.000388182
Npc2b	FBgn0038198	242.15	-0.885711	6.45224356537765e-05	0.000388932
ham	FBgn0045852	467.265	-1.01297	6.45347425110488e-05	0.000388932
CG10011	FBgn0039590	701.171	-0.82186	6.5407299023604e-05	0.00039398
Aprt	FBgn0000109	682.777	-0.560209	6.57191571366305e-05	0.000395648
ZnT86D	FBgn0037875	1426.1	-0.650679	6.58555246927623e-05	0.000396257
CG2614	FBgn0032873	507.565	0.553771	6.60184844991329e-05	0.000397026
Spx	FBgn0015818	302.41	0.463523	6.66613400211619e-05	0.000400678
CG14207	FBgn0031037	1269.31	-0.504788	6.68213185290059e-05	0.000401426
ect	FBgn0000451	148.348	-1.05224	6.70072186280928e-05	0.000402329
qin	FBgn0263974	16.7087	-1.86611	6.71677144640687e-05	0.000403078
ldbr	FBgn0035838	103.716	0.69044	6.73855729015307e-05	0.000403955
Tctp	FBgn0037874	20486	-0.719888	6.73552931020287e-05	0.000403955
CG31013	FBgn0051013	4.53913	-2.83998	6.75139310921455e-05	0.00040451
Vha100-1	FBgn0028671	1355.81	0.385746	6.75539306032616e-05	0.000404535
sigmar	FBgn0034894	977.625	-0.484872	6.80968272553677e-05	0.000407396
CG6689	FBgn0037877	242.624	-0.477705	6.81039865017653e-05	0.000407396
Sema-2b	FBgn0264273	40.97	1.68106	6.88107905026805e-05	0.000411406
lig3	FBgn0038035	1097.31	-0.816383	7.02003268176065e-05	0.000419492
Sep1	FBgn0011710	454.671	0.673927	7.04088702041094e-05	0.000420515
CG43400	FBgn0263314	36.851	-1.93156	7.07101988387129e-05	0.000422091
Fak	FBgn0020440	756.025	-0.466809	7.09211806880207e-05	0.000423127
Rala	FBgn0015286	4208.8	0.426408	7.09825897848102e-05	0.00042317
CG14219	FBgn0031033	545.835	-1.79024	7.10034359407283e-05	0.00042317
CG10738	FBgn0036368	92.205	-1.71116	7.15746849431909e-05	0.000426349
CR45082	FBgn0266457	26.0886	1.73937	7.19387301704169e-05	0.000428292
nkd	FBgn0002945	133.381	-0.717993	7.20092895597036e-05	0.000428486
CG5862	FBgn0038868	768.447	-0.486688	7.20886885103332e-05	0.000428732
Ef1gamma	FBgn0029176	23170.4	-0.559902	7.26329487418199e-05	0.000431514
CG34261	FBgn0085290	14.1494	1.69266	7.26187753004466e-05	0.000431514
Sem1	FBgn0266666	986.195	0.46944	7.27985330100275e-05	0.00043227
Slob	FBgn0264087	51.4274	-1.10853	7.33260433689375e-05	0.000435173
CG17230	FBgn0046225	85.7126	1.01876	7.34473294303702e-05	0.000435664
NetA	FBgn0015773	1002.34	1.04943	7.36904541618183e-05	0.000436876
E(spl)m7-HLH	FBgn0002633	5.86933	2.72572	7.4029167709425e-05	0.000438654
Nup54	FBgn0033737	229.408	0.527261	7.41612448924496e-05	0.000439206
geminin	FBgn0033081	389.07	0.635321	7.44254818474835e-05	0.000440539
Nup43	FBgn0038609	283.999	0.944178	7.45360073415462e-05	0.000440962
CG13900	FBgn0035162	1827.16	-0.780959	7.55152360624179e-05	0.000446521
CG31855	FBgn0051855	299.694	0.555351	7.62119698186129e-05	0.000450405
CR43626	FBgn0263617	4.60214	2.81243	7.68224392630914e-05	0.000453775
CG3792	FBgn0031662	402.999	-0.924646	7.69505714646437e-05	0.000454294
Cda5	FBgn0051973	42.9864	1.50615	7.69946343071521e-05	0.000454317
CG43340	FBgn0263077	2998	-0.439358	7.76707561835247e-05	0.000458067
CG4301	FBgn0030747	7006.04	-0.493058	7.78862470160125e-05	0.000459098
RpL19	FBgn0002607	32071.2	-0.568167	7.80942684126814e-05	0.000460017
CG1718	FBgn0031170	9044.5	-1.46352	7.81238593523837e-05	0.000460017
S	FBgn0003310	412.523	0.565553	7.83350247673104e-05	0.00046102
CG13894	FBgn0035157	3.89097	-2.77573	7.85478749824954e-05	0.000462032
RpS9	FBgn0010408	35376.6	-0.85388	7.87486603632525e-05	0.000462972
FucTA	FBgn0036485	96.1714	1.88833	7.88533639004367e-05	0.000463346
RpS14b	FBgn0004404	6416.65	-0.729067	7.90739079568914e-05	0.000464158
CR45140	FBgn0266633	34.3593	1.78258	7.90653559606606e-05	0.000464158
ChAT	FBgn0000303	9.64271	2.33754	7.91787203988171e-05	0.000464532
CG5705	FBgn0032486	181.409	0.604517	7.93700607143988e-05	0.000465412
CG2658	FBgn0024992	1255.79	0.470902	8.0130221566224e-05	0.000469625
NitFhit	FBgn0024945	581.077	-0.529132	8.02191174621771e-05	0.000469902
Mdr65	FBgn0004513	19.5955	-1.44247	8.14461711483946e-05	0.000476595
pnut	FBgn0013726	1563.48	0.601282	8.14081830838578e-05	0.000476595
l(2)37Cc	FBgn0002031	4912.65	0.391319	8.18703855496037e-05	0.000478829
CG6295	FBgn0039471	64046.8	-2.32433	8.21020558503467e-05	0.000479935
CG31019	FBgn0051019	4.81406	-2.70891	8.29355091754618e-05	0.000484556
CG13295	FBgn0035674	356.937	-0.442593	8.318241688419e-05	0.000485496
CG14523	FBgn0039612	31.5324	-1.08067	8.31431024240824e-05	0.000485496
CG6006	FBgn0063649	251.957	-0.998268	8.33787696064616e-05	0.000486391
CG31457	FBgn0051457	112.963	0.648649	8.34284774235805e-05	0.000486429
GstD6	FBgn0010042	15.331	2.35538	8.35718105947222e-05	0.000487013
Pex10	FBgn0035233	412.61	-0.528197	8.41513303984164e-05	0.000490137
CG42541	FBgn0260658	61.8728	-1.16598	8.43302384596498e-05	0.000490926
Rpn11	FBgn0028694	1926.24	0.400548	8.4780535688452e-05	0.000493292
CG42342	FBgn0259244	59.4586	-0.9808	8.57752946335179e-05	0.000498823
MetRS-m	FBgn0027083	247.31	0.558797	8.61651190667271e-05	0.000500832
ben	FBgn0000173	4028.22	0.479442	8.7119685812344e-05	0.00050612
CG18815	FBgn0042138	2900.57	0.397541	8.85324669434559e-05	0.000514062
CR44046	FBgn0264838	6.38958	-2.34234	8.8865677798833e-05	0.000515732
Rm62	FBgn0003261	10070.4	-0.525801	8.97476589323491e-05	0.000520583
CG9328	FBgn0032886	97.4507	-0.738762	8.98323137831349e-05	0.000520806
mRpL44	FBgn0037330	566.891	0.415706	9.03532987948425e-05	0.000523557
CG6425	FBgn0039449	14.7172	1.54077	9.0452822776159e-05	0.000523865
CR45835	FBgn0267485	32.9477	1.11778	9.07029652835166e-05	0.000525044
Hmu	FBgn0015737	2892.84	0.537292	9.14428015117895e-05	0.000529055
CG3773	FBgn0038692	172.705	0.623102	9.16418678657626e-05	0.000529935
GstD8	FBgn0010044	247.171	1.57525	9.17901790229062e-05	0.000530457
shot	FBgn0013733	12781	-0.78002	9.1826230984973e-05	0.000530457
CG2034	FBgn0015359	221.568	0.566291	9.18838318538105e-05	0.000530519
TotX	FBgn0044810	8.41651	2.96726	9.24371852959975e-05	0.000533441
ABCB7	FBgn0035244	2304.29	-0.483043	9.29011422618187e-05	0.000535844
pgant3	FBgn0027558	1031.56	0.877255	9.30045359565718e-05	0.000536166
AP-2mu	FBgn0263351	766.772	0.584184	9.33000020713958e-05	0.000537595
Rint1	FBgn0035762	609.659	-0.571715	9.41339088901798e-05	0.000542123
tub	FBgn0003882	479.139	-0.462073	9.5464588007508e-05	0.000549506
ApepP	FBgn0026150	3087.23	-0.460592	9.554155949743e-05	0.000549669
Sucb	FBgn0029118	1726.9	0.58416	9.56059116223036e-05	0.000549758
l(1)G0320	FBgn0028327	7069.65	-0.580101	9.59893340116443e-05	0.000551682
CG15747	FBgn0030474	268.104	0.47233	9.6249829028959e-05	0.000552897
CG13654	FBgn0039290	267.301	-0.646088	9.63348167309314e-05	0.000553104
Sgf29	FBgn0050390	191.983	0.594112	9.67738464764551e-05	0.000555342
mRNA-cap	FBgn0030556	691.38	-0.405689	9.68975080344556e-05	0.000555769
RpL10	FBgn0024733	52447.1	-0.616721	9.79003301845368e-05	0.000561236
CG9717	FBgn0039789	117.271	-2.16216	9.80370149871418e-05	0.000561734
CG15211	FBgn0030234	2736.17	-0.482508	9.82175246763576e-05	0.000562482
Ect3	FBgn0260746	187.349	-1.26416	9.85006065050624e-05	0.000563817
Pex13	FBgn0033812	2092.06	-0.569948	0.00010018	0.000573141
CG31145	FBgn0051145	830.201	-0.517225	0.000100397	0.000574092
mld	FBgn0263490	170.164	0.612345	0.000100856	0.000576423
CG8086	FBgn0032010	75.0561	-0.851872	0.00010109	0.000577466
RpS2	FBgn0004867	42711.7	-0.781155	0.000101301	0.000578382
Burs	FBgn0038901	165.815	0.583728	0.000102039	0.000582299
CG32024	FBgn0052024	79.0752	-2.13739	0.000102239	0.000583144
homer	FBgn0025777	714.707	-0.420485	0.000102396	0.000583746
alpha-Man-Ia	FBgn0259170	473.084	0.702926	0.000103081	0.000587354
CG15912	FBgn0029712	67.9045	-1.13647	0.000103697	0.000590565
CR44744	FBgn0265957	17.2406	1.76279	0.000104285	0.000593613
CG43120	FBgn0262580	943.016	-1.28418	0.000104989	0.000597318
TBPH	FBgn0025790	646.024	-0.419682	0.000105989	0.000602703
Lcp1	FBgn0002531	34.5746	2.45939	0.000106572	0.000605717
CG10562	FBgn0039326	3629.45	-0.585339	0.00010674	0.000606363
CG6018	FBgn0034736	2576.72	0.447533	0.000107064	0.000607901
sut3	FBgn0028561	2.40959	-2.91539	0.000107846	0.000611722
RpL34b	FBgn0037686	11848.3	-0.617398	0.000107826	0.000611722
Vps8	FBgn0035704	461.47	-0.427762	0.000107951	0.000612009
blp	FBgn0038387	526.267	-0.490514	0.000108064	0.000612119
CR44953	FBgn0266258	59.7942	1.01359	0.000108078	0.000612119
CG7458	FBgn0037144	585.398	-0.909757	0.000108151	0.000612224
l(3)neo38	FBgn0265276	1111.55	0.579027	0.000108822	0.000615714
del	FBgn0086251	151.636	-0.695384	0.000109315	0.00061819
l(2)dtl	FBgn0013548	84.7645	0.932927	0.000109685	0.000619975
barr	FBgn0014127	144.588	0.736895	0.00011032	0.000623247
LManV	FBgn0032068	49647.4	-1.67608	0.000111113	0.000627418
CG17570	FBgn0260000	424.824	-1.69464	0.000111526	0.000629435
[truncated: 10,259 more rows]

## Sheet: Padj=0.01 LogFC > 1
Symbol	ID	baseMean	log2FoldChange	pvalue	padj
CR44717	FBgn0265928	321.259	7.8159	6.50804424319729e-58	8.15819501686131e-55
toy	FBgn0019650	111.446	7.15904	6.27104103150822e-35	1.81409961326861e-32
CR40469	FBgn0058469	927.329	6.56919	1.08352306967873e-52	9.40331328624263e-50
CR45822	FBgn0267472	138.599	6.48066	1.05314777854767e-45	5.40073328980674e-43
CR45600	FBgn0267160	176.4	5.56817	1.29500177698039e-60	1.8262762559866e-57
CG5070	FBgn0030824	95.6541	5.41814	6.53934180580175e-19	3.42295144915004e-17
Cnx14D	FBgn0264077	37.2504	5.0869	1.41854275813514e-21	1.07409391928058e-19
CG6912	FBgn0038290	119.082	5.06678	5.74806783451564e-45	2.81955223082632e-42
CG14302	FBgn0038647	68.6617	4.99293	1.38797299042075e-25	1.53520698803205e-23
AstA-R1	FBgn0266429	26.8004	4.89699	6.57009729620372e-18	3.11444696200716e-16
CG18063	FBgn0028856	16.9894	4.89423	9.0273039920396e-14	2.52094167421264e-12
CG9360	FBgn0030332	365.464	4.74787	1.92350003084284e-26	2.26051326541343e-24
CG1077	FBgn0037405	40.3085	4.56234	1.14566810372911e-11	2.45264279815405e-10
CR45542	FBgn0267102	13.0988	4.52859	1.94453044612855e-11	4.03419973044953e-10
CG42821	FBgn0262003	55.3087	4.41054	6.61452341445259e-17	2.7949458113054e-15
CR44291	FBgn0265318	26.2283	4.38137	2.60936417487294e-16	1.00473879252275e-14
CG32302	FBgn0052302	103.682	4.31581	1.52387390665402e-30	2.86539090247844e-28
CG1924	FBgn0030377	12.1598	4.1765	4.61415882843666e-11	9.03766317750389e-10
unc	FBgn0003950	31.0283	4.17573	2.22545123574186e-10	3.86269859102148e-09
CR45195	FBgn0266705	27.0542	4.1645	1.0235204416503e-14	3.1723509952469e-13
CG12880	FBgn0046258	25.8497	4.13027	1.01612977747836e-14	3.15812015138041e-13
blanks	FBgn0035608	25.6784	4.11936	1.48053597876111e-14	4.47812517758253e-13
CG6996	FBgn0036950	66.4973	4.10305	9.23070708793725e-21	6.12593160977106e-19
CG14079	FBgn0036849	22.0246	4.08678	2.34739973016952e-13	6.18770181209639e-12
Drsl2	FBgn0052279	86.6499	3.95722	4.01976057039082e-20	2.50557672680383e-18
fne	FBgn0086675	63.5378	3.88198	1.3604958312754e-14	4.12610590549707e-13
Ada1-1	FBgn0051865	6.98389	3.84009	4.35216605595783e-08	5.14686975296816e-07
Cpr49Ag	FBgn0033730	6.64643	3.74418	1.20985749612673e-07	1.32007855621874e-06
GstD5	FBgn0010041	962.268	3.69834	9.14835460035517e-33	2.06423473202414e-30
CG6933	FBgn0036952	388.982	3.6768	1.73698307300987e-16	6.85197308730678e-15
Def	FBgn0010385	317.067	3.63993	1.78125067375502e-17	8.1032540731065e-16
CG14695	FBgn0037850	126.381	3.6096	4.26546941006983e-23	3.73046712282231e-21
CG8629	FBgn0035742	9.69651	3.60123	1.57625655797447e-07	1.66979591427868e-06
CR32224	FBgn0052224	78.852	3.57693	1.40782189073813e-13	3.83648467905979e-12
feo	FBgn0030241	85.4193	3.56942	4.93767221036582e-30	9.13226522579462e-28
Cpr11B	FBgn0030398	5.83079	3.52323	9.90258419449752e-07	9.01702622133341e-06
CR43264	FBgn0262945	127.577	3.506	2.01680472898461e-10	3.52768851975262e-09
Taf12L	FBgn0031623	5.41027	3.47092	1.45767771741132e-06	1.28984470649682e-05
CG13643	FBgn0040601	19.3669	3.39025	1.60102300662694e-10	2.84452623004176e-09
CR44713	FBgn0265924	5.36682	3.37861	3.49714776724792e-06	2.83643573760539e-05
piwi	FBgn0004872	25.357	3.37469	8.59562363793758e-10	1.38339266595167e-08
TotC	FBgn0044812	40.3739	3.35952	1.12474224299867e-06	1.01677419755697e-05
CR43463	FBgn0266428	54.4393	3.33067	7.55038752591524e-18	3.54931133614066e-16
CG7290	FBgn0036949	26.5329	3.32052	1.07291871373394e-09	1.6929606892792e-08
Gr94a	FBgn0041225	28.364	3.31404	1.06056117245924e-14	3.27815099936579e-13
Neto	FBgn0265416	31.1515	3.30747	3.92366515678887e-17	1.72244320229152e-15
CR43723	FBgn0263967	6.76337	3.30317	1.47775345616179e-06	1.30556104090973e-05
Phk-3	FBgn0035089	460.988	3.30136	3.03906486752485e-27	3.94100342935809e-25
CG18598	FBgn0038589	17.5917	3.27349	7.05944074169837e-10	1.14761686524267e-08
CG4250	FBgn0034761	291.349	3.25592	1.30876802943053e-19	7.57206200412064e-18
DptA	FBgn0004240	341.088	3.24729	1.12656420686558e-15	4.00943135074367e-14
CG13579	FBgn0035010	5.86242	3.17971	3.67509490840106e-06	2.96796139989841e-05
bora	FBgn0259791	10.4578	3.15441	4.34559162715116e-08	5.14448738064211e-07
Mcm10	FBgn0032929	60.6119	3.1517	2.0091545799856e-14	5.94941784026183e-13
CG2909	FBgn0030189	712.066	3.13361	2.68690149567228e-40	1.12272676571017e-37
PCNA	FBgn0005655	416.494	3.11438	1.79240761018574e-19	1.02131023525836e-17
Amyrel	FBgn0020506	433.634	3.0958	1.89257509686707e-06	1.63366734834386e-05
upd3	FBgn0053542	321.134	3.0851	4.09703022878417e-18	1.99235754487685e-16
CG42867	FBgn0262141	13.3388	3.05347	2.55162611561039e-08	3.12907019959961e-07
CG9514	FBgn0030592	9.85988	3.02604	3.54570238945445e-07	3.5780513736874e-06
CR40571	FBgn0085746	20.8249	3.02136	2.58205801925047e-10	4.42716999592459e-09
Cks30A	FBgn0010314	17.576	3.00945	2.47231989067624e-09	3.60837166967779e-08
RnrL	FBgn0011703	479.129	2.99542	4.90017640055195e-21	3.37096281408701e-19
CG5084	FBgn0034288	68.8078	2.99288	2.21295723400677e-16	8.57958196359602e-15
TotX	FBgn0044810	8.41651	2.96726	9.24371852959975e-05	0.000533441
Orc2	FBgn0015270	58.4937	2.96681	1.50636331325415e-22	1.26826797762189e-20
Ilp3	FBgn0044050	59.43	2.95908	5.91452932573293e-09	8.14746274150415e-08
ppk13	FBgn0053508	33.7618	2.91139	5.27630292648556e-09	7.31292992833048e-08
CG43894	FBgn0264486	59.6604	2.909	1.55296533600586e-16	6.16920947916129e-15
DptB	FBgn0034407	105.091	2.90413	5.45709236093664e-05	0.000334967
Ir68a	FBgn0036150	19.4233	2.88835	1.6614912017629e-07	1.75678947875249e-06
CG13690	FBgn0031252	61.6234	2.87868	1.61319278180688e-15	5.63468760506044e-14
Mcm5	FBgn0017577	117.832	2.87108	1.14320477097855e-19	6.6827130705596e-18
CG13300	FBgn0035699	110.312	2.84041	7.03398223772979e-15	2.2935661157823e-13
CR44458	FBgn0265651	9.30994	2.82281	3.93464467556189e-05	0.000250088
DNApol-epsilon58	FBgn0035644	48.0345	2.82035	7.42951306767074e-15	2.39912769523619e-13
WRNexo	FBgn0038608	124.467	2.81527	8.54362163210886e-13	2.10456635924568e-11
CR43626	FBgn0263617	4.60214	2.81243	7.68224392630914e-05	0.000453775
CG11382	FBgn0040367	14.0345	2.80573	0.000129999	0.000719296
gammaTub37C	FBgn0010097	8.34546	2.80555	3.0340783010517e-06	2.5058910243386e-05
Ote	FBgn0266420	95.5034	2.79547	1.01927623845196e-27	1.40237494173354e-25
CR42868	FBgn0262142	2.77795	2.77947	0.000196088	0.00103862
Ref2	FBgn0032439	5.95533	2.77373	4.82156808912549e-05	0.000299378
CG3568	FBgn0029710	36.0555	2.76734	5.66656779843815e-16	2.09607271809768e-14
CG42540	FBgn0260657	22.5265	2.76366	5.72238128795703e-07	5.52266088030207e-06
fig	FBgn0039694	107.016	2.73298	5.25572449500629e-14	1.50495136428073e-12
Mcm7	FBgn0020633	172.206	2.72874	1.96286252928471e-15	6.75152898030185e-14
E(spl)m7-HLH	FBgn0002633	5.86933	2.72572	7.4029167709425e-05	0.000438654
cv-2	FBgn0000395	1138.18	2.72023	3.31331711684095e-40	1.33503013257856e-37
CG15829	FBgn0035743	2682.75	2.71529	4.99493665856695e-19	2.63331193373609e-17
CG13135	FBgn0032184	3.20458	2.70367	0.000337574	0.00167702
CR44138	FBgn0264987	564.711	2.69863	3.98167180657462e-20	2.49562340676527e-18
CG7248	FBgn0036229	9.53808	2.685	1.08751479783952e-05	7.89025205737976e-05
CR45371	FBgn0266911	20.8906	2.68291	3.56552525462891e-08	4.28394631764892e-07
stg	FBgn0003525	45.2277	2.67125	1.66925202102764e-10	2.96108511025689e-09
CR43972	FBgn0264703	2.78782	2.67011	0.00039152	0.00191549
CG31601	FBgn0051601	2.92446	2.66941	0.000397541	0.0019399
aurB	FBgn0024227	53.8217	2.66743	1.15306488164622e-16	4.69634584647388e-15
CR44716	FBgn0265927	2.67768	2.66651	0.000389912	0.00190928
CG14528	FBgn0039611	39.2303	2.66194	2.88219010851685e-09	4.11605934231482e-08
sub	FBgn0003545	26.6087	2.64208	9.56436410786131e-09	1.26352641527976e-07
CR43971	FBgn0264702	3.78624	2.63147	0.000227966	0.00119291
Pen	FBgn0267727	193.825	2.62678	9.5640197444302e-08	1.06306670696218e-06
CG11227	FBgn0031139	37.6063	2.62305	5.79952667084799e-05	0.000354251
Wnt5	FBgn0010194	68.3015	2.61794	1.92164856572739e-11	4.00000721744214e-10
m	FBgn0002577	2.41394	2.61328	0.000513343	0.00240829
CG14526	FBgn0027578	79.289	2.61317	6.57141628646704e-10	1.07759765325467e-08
CG2990	FBgn0030170	27.9695	2.6054	1.61858383107343e-09	2.46103271996906e-08
yellow-k	FBgn0036504	10.0247	2.60329	7.2242848784085e-06	5.45910127248524e-05
CG13324	FBgn0033789	3975.74	2.59811	4.05138234281781e-11	8.07556459216794e-10
CG15431	FBgn0031602	481.076	2.59652	3.86733219123344e-15	1.30242512780584e-13
Shawl	FBgn0085395	2.42473	2.5944	0.000574106	0.00265019
CG3984	FBgn0038291	28.894	2.59428	2.11305509377101e-05	0.000142837
upd1	FBgn0004956	2.43892	2.59217	0.000585395	0.00269408
CG10336	FBgn0032698	47.9726	2.5746	2.46245698545188e-17	1.10683026732542e-15
CG14339	FBgn0031301	7.5189	2.56708	5.80713651311231e-05	0.000354524
CG31344	FBgn0051344	347.496	2.55388	7.87082986435404e-15	2.51141417844119e-13
CG33346	FBgn0053346	2215.16	2.55152	1.43777867918829e-18	7.20934180382323e-17
Npc2e	FBgn0051410	10527.4	2.55076	4.94473250305222e-05	0.000306519
CG3448	FBgn0035996	211.444	2.5468	7.40884520132262e-23	6.38065584437571e-21
CycE	FBgn0010382	111.249	2.54022	2.19581970639385e-13	5.82899715942011e-12
TotA	FBgn0028396	70.8772	2.53918	0.000881891	0.00385042
CG32668	FBgn0052668	2.20694	2.52745	0.000812133	0.00358891
CG12725	FBgn0030483	2.52158	2.52113	0.000874404	0.00382217
CG9616	FBgn0038214	4.07955	2.51563	0.000614867	0.0028062
CG5644	FBgn0035948	17.9175	2.51406	3.02894838405985e-08	3.68239177467276e-07
asp	FBgn0000140	44.75	2.50997	4.89269026620719e-08	5.72607174101136e-07
Nuf2	FBgn0031886	30.7693	2.50853	4.12812454257297e-12	9.35210865247153e-11
CG30441	FBgn0050441	15.7324	2.50792	3.38879911895731e-06	2.76048813834033e-05
CR44478	FBgn0265671	5.41952	2.47137	0.000114402	0.000642131
Spn88Eb	FBgn0038299	18.5386	2.46481	1.35419953387445e-05	9.60281529929072e-05
CG10089	FBgn0036369	32.9805	2.46331	1.8258089732828e-08	2.2964076740888e-07
Lcp1	FBgn0002531	34.5746	2.45939	0.000106572	0.000605717
CG18765	FBgn0042110	346.818	2.44663	4.5029774450723e-16	1.68220501772535e-14
DNApol-alpha60	FBgn0259676	65.52	2.42832	7.90414222640387e-16	2.87659782575124e-14
DNApol-alpha180	FBgn0259113	169.108	2.39651	8.95288501622834e-13	2.20057622555747e-11
Hs3st-A	FBgn0053147	111.449	2.39395	2.72223765990603e-07	2.794566449414e-06
CG7017	FBgn0036951	160.951	2.37969	0.000615393	0.00280746
DIP-beta	FBgn0259245	14.098	2.36678	4.22669100652556e-07	4.22744041982459e-06
CNMaR	FBgn0053696	6.11186	2.36326	0.000698978	0.00314429
tum	FBgn0086356	50.3752	2.35836	1.84068897201032e-09	2.76520013078833e-08
dah	FBgn0015926	13.4744	2.35723	3.95385213192015e-06	3.1703880420983e-05
GstD6	FBgn0010042	15.331	2.35538	8.35718105947222e-05	0.000487013
Cep89	FBgn0266708	2.01075	2.35314	0.00197565	0.00782081
CR43464	FBgn0263441	6.80354	2.35086	4.67863508058351e-05	0.00029196
polo	FBgn0003124	112.335	2.33852	2.08163825321693e-09	3.07798725724685e-08
ChAT	FBgn0000303	9.64271	2.33754	7.91787203988171e-05	0.000464532
CG42747	FBgn0261801	107.28	2.33752	1.96675446693322e-06	1.69381098442294e-05
CG8945	FBgn0030815	1.98515	2.33032	0.002204	0.00858276
pav	FBgn0011692	56.2339	2.32599	6.38792793431638e-08	7.30178348074543e-07
CG30431	FBgn0050431	7.02653	2.32402	0.00062938	0.00286548
CG3812	FBgn0030421	126.969	2.32185	1.66705313746365e-09	2.52452261702884e-08
rho	FBgn0004635	71.5356	2.31798	1.15062674632686e-07	1.26277927549219e-06
Phf7	FBgn0031091	26.1461	2.30965	1.81081119109015e-10	3.1921206027936e-09
CR44785	FBgn0266020	6.36481	2.30938	0.000434316	0.00208686
pch2	FBgn0051453	119.314	2.30651	6.60071937947786e-12	1.45447882889198e-10
CR40613	FBgn0085756	5.80594	2.30365	0.000213424	0.00112254
RecQ4	FBgn0040290	74.9675	2.30242	9.42639321391566e-12	2.04910536106737e-10
bi	FBgn0000179	5.51748	2.30027	0.000859616	0.00376629
CG15142	FBgn0032645	9.38536	2.29324	0.000113628	0.000638105
Arc1	FBgn0033926	25690.6	2.28534	2.50334101441575e-20	1.60469848435446e-18
DNApol-alpha73	FBgn0005696	60.1938	2.27708	1.13123069039966e-16	4.6578630106164e-15
rev7	FBgn0037345	297.537	2.27595	6.81658064131258e-15	2.229120660733e-13
CG43295	FBgn0262987	19.6432	2.27283	4.90399365714274e-07	4.81356434060914e-06
cnn	FBgn0013765	448.22	2.2599	5.74137928087062e-24	5.48934246159173e-22
hd	FBgn0086695	56.8746	2.25815	4.87539631615207e-12	1.09570161830334e-10
ImpE1	FBgn0001253	11.1175	2.25749	3.18224834398574e-06	2.6148671388818e-05
Claspin	FBgn0052251	100.703	2.24088	5.4471932033882e-13	1.37483744341445e-11
Kaz1-ORFB	FBgn0063923	89.6768	2.23732	2.4387039382946e-08	2.99710869627883e-07
CR44667	FBgn0265878	13.0149	2.22541	3.38882828541159e-06	2.76048813834033e-05
CG3397	FBgn0037975	557.054	2.22539	3.72265751440008e-10	6.29670495913968e-09
upd2	FBgn0030904	17.8193	2.22513	1.54324867286978e-05	0.000107941
RPA3	FBgn0266421	300.374	2.22281	1.25888572965966e-12	3.05435458107963e-11
RPA2	FBgn0032906	272.912	2.22239	2.72017024451704e-19	1.48975537372045e-17
CG10559	FBgn0039323	390.303	2.21456	4.07057492620075e-10	6.85436213692491e-09
Mcm2	FBgn0014861	133.122	2.21216	4.11086944646316e-20	2.54828731291194e-18
FBgn0000210	FBgn0000210	56.9794	2.20851	1.4817015737479e-11	3.11876066325071e-10
sti	FBgn0002466	66.1503	2.20639	2.46179651154994e-05	0.000163858
Pi3K21B	FBgn0020622	3049.23	2.20359	2.18761551130833e-40	9.49256853791563e-38
CG14527	FBgn0039613	5.35028	2.20304	0.000431257	0.00207533
CG12970	FBgn0034047	191.532	2.20249	4.67881253091376e-05	0.00029196
pim	FBgn0003087	11.2779	2.2007	3.83754604639169e-05	0.00024516
CG10638	FBgn0036290	1801.61	2.19673	9.08109296107629e-48	5.39225740983488e-45
rempA	FBgn0260933	254.837	2.1896	6.69323621701719e-09	9.15310193944097e-08
CG5612	FBgn0039529	55.1066	2.18554	2.23838929169416e-12	5.27213110415313e-11
CG3964	FBgn0031574	21.6213	2.17781	3.27530354268041e-06	2.68156564357913e-05
Ama	FBgn0000071	3.44242	2.15248	0.00209655	0.00821864
CR44718	FBgn0265929	4.52755	2.15138	0.00137843	0.00571743
CG7179	FBgn0020880	85.4346	2.14872	1.92099683877392e-13	5.1357076623335e-12
CR45970	FBgn0267632	7.96593	2.14601	0.000157784	0.000853772
CG6330	FBgn0039464	294.252	2.13921	3.23986822615688e-37	1.14225604148443e-34
CG44013	FBgn0264775	2340.1	2.13552	1.10638017475175e-08	1.4446968902256e-07
CG10588	FBgn0037037	6.73488	2.13407	0.00104676	0.00448009
CG44102	FBgn0264911	4.34721	2.12907	0.00143154	0.00590519
CCAP-R	FBgn0039396	16.1762	2.12579	7.5072817082862e-06	5.65779240032631e-05
Pms2	FBgn0011660	71.01	2.1245	2.18297085343499e-10	3.79480387803599e-09
Ts	FBgn0024920	77.0383	2.10283	2.60392113484596e-09	3.75397953016383e-08
CR45392	FBgn0266941	27.5914	2.0985	4.31434297074008e-09	6.02406155889722e-08
Sox21a	FBgn0036411	712.707	2.09362	1.34840989345797e-06	1.19691270007811e-05
Cdk1	FBgn0004106	46.8581	2.09217	2.76898863843945e-05	0.000182475
gwl	FBgn0260399	20.0902	2.08852	3.33773757685202e-05	0.000216292
CG43402	FBgn0263321	11.3075	2.08391	0.000399069	0.00194568
CR45973	FBgn0267635	7.84462	2.07777	0.000417338	0.00202078
Klp67A	FBgn0004379	25.7553	2.06012	8.74407405153948e-10	1.39731789588482e-08
shu	FBgn0003401	32.6419	2.0566	1.15880679645914e-07	1.27052072669116e-06
sda	FBgn0015541	4386.37	2.05551	6.27077414881156e-31	1.21977368873952e-28
obst-F	FBgn0036947	8.57578	2.0523	0.00149382	0.00612845
Rif1	FBgn0050085	143.036	2.04646	7.93618390845375e-15	2.51505693413413e-13
cutlet	FBgn0015376	66.3689	2.04253	3.15258455522402e-10	5.3646242763254e-09
dgt2	FBgn0032390	164.554	2.03962	1.37069532605085e-11	2.9013479678247e-10
tos	FBgn0015553	19.9411	2.03654	5.82554085265566e-07	5.61261758323323e-06
CG17906	FBgn0032086	80.0817	2.01723	1.95182826595461e-14	5.81016530250658e-13
CG42822	FBgn0262004	7.64774	2.01084	0.000966754	0.0041789
Cht12	FBgn0050293	9.32438	2.0084	0.000414346	0.00200801
CG34356	FBgn0085385	19.6198	2.00827	2.68211863826016e-05	0.000177061
CG34291	FBgn0085320	24.4298	2.00799	0.00261018	0.00990515
CG18213	FBgn0038470	120.365	1.98992	3.61463894551828e-11	7.26922577243087e-10
sip2	FBgn0031878	58.7262	1.98991	7.48511371615601e-07	7.01387482937476e-06
ver	FBgn0262524	166.311	1.9878	2.52216019322778e-21	1.85980466013045e-19
mud	FBgn0002873	54.5235	1.98571	1.9670361289878e-08	2.45759707721377e-07
Mcm3	FBgn0024332	178.018	1.98343	1.04233818907726e-18	5.27338988752004e-17
cuff	FBgn0260932	159.156	1.98321	1.36041282941229e-07	1.47862982094696e-06
CG4408	FBgn0039073	17.4358	1.98121	3.03505870064461e-05	0.000198387
sc	FBgn0004170	22.9916	1.97915	4.62551370008723e-05	0.000289434
CG43055	FBgn0262357	905.456	1.97801	7.06077388511952e-07	6.67837175015627e-06
CG5359	FBgn0037773	58.8941	1.96979	1.07174132292809e-14	3.30365726920075e-13
CR40190	FBgn0085732	107.783	1.96576	5.20581237468864e-16	1.9319728687907e-14
scra	FBgn0261385	196.085	1.96498	1.88784958159023e-11	3.93691663207042e-10
CycB	FBgn0000405	92.1836	1.96153	9.30869075522677e-10	1.48125033992198e-08
babos	FBgn0034724	306.075	1.96021	2.71975115205642e-11	5.53867012590262e-10
Cyp6d2	FBgn0034756	982.689	1.94916	4.25192537730249e-08	5.04418739292604e-07
betaTub60D	FBgn0003888	3061.39	1.94685	1.74393944864362e-06	1.51114630258044e-05
CG17684	FBgn0263780	8.10364	1.94618	0.000782021	0.00347763
CR45313	FBgn0266852	10.9323	1.94496	0.000612747	0.00279874
CR42874	FBgn0262148	60.2722	1.93928	1.7631421035362e-05	0.000121662
Dl	FBgn0000463	656.382	1.93127	5.8945396672638e-14	1.66672171744537e-12
mei-38	FBgn0260986	16.2931	1.92408	0.000144054	0.000788559
Mocs1	FBgn0263241	1315.81	1.91873	5.06148492995221e-35	1.50272823630844e-32
borr	FBgn0032105	25.934	1.91742	1.26454355941394e-06	1.12957881530547e-05
CG13488	FBgn0034670	455.894	1.91501	6.93082658468253e-10	1.12833456750921e-08
DNApol-epsilon255	FBgn0264326	123.304	1.91066	1.43895569980157e-07	1.54759754100679e-06
CR43671	FBgn0263746	23.9688	1.90278	8.09988043323639e-07	7.53362333452374e-06
dpa	FBgn0015929	263.134	1.90157	4.63614227817348e-22	3.70957143137257e-20
Nxt1	FBgn0028411	467.084	1.90153	2.00847227058996e-13	5.35687568718581e-12
wfs1	FBgn0039003	502.178	1.89252	2.38653269892258e-28	3.45190537298007e-26
mms4	FBgn0033549	6.02602	1.89094	0.00183595	0.0073347
cid	FBgn0040477	5.1067	1.89003	0.00220465	0.00858276
cmet	FBgn0040232	59.4092	1.88884	0.000275991	0.00141261
FucTA	FBgn0036485	96.1714	1.88833	7.88533639004367e-05	0.000463346
Cht4	FBgn0022700	1727.58	1.888	2.09374213566766e-20	1.349805644263e-18
Ssrp	FBgn0010278	1059.01	1.88461	5.65960954863814e-31	1.12020552504799e-28
CG9752	FBgn0034614	43.5166	1.88421	9.4150205296522e-06	6.95614024987139e-05
RpA-70	FBgn0010173	1665.16	1.88055	3.2082494376258e-51	2.41303134368628e-48
ush	FBgn0003963	250.958	1.87731	7.15370808899301e-18	3.3769094000008e-16
CG7884	FBgn0031001	6.61583	1.87322	0.0012168	0.0051281
Cyp309a1	FBgn0031432	1889.26	1.86494	4.49383840567295e-05	0.000282291
Grip71	FBgn0032705	38.3092	1.86283	5.54603349140633e-09	7.66793503064292e-08
CG7130	FBgn0037151	352.896	1.85651	1.47246772510119e-21	1.10749205830611e-19
CG18190	FBgn0034403	41.0439	1.85014	1.1450793583884e-07	1.25791483167847e-06
squ	FBgn0267347	29.8197	1.84335	5.83382570965902e-08	6.71604302616052e-07
CG7352	FBgn0037581	6.37585	1.83327	0.00141408	0.00584307
CG10589	FBgn0037035	23.8553	1.82719	2.87741378911822e-06	2.38486634080963e-05
Chd3	FBgn0023395	24.4304	1.8239	3.41300262608468e-06	2.77617127811733e-05
Pvf2	FBgn0031888	68.5162	1.81752	4.73767269822572e-08	5.57355822537879e-07
Rrp1	FBgn0004584	175.817	1.81679	7.9519061421553e-10	1.28713637153223e-08
CG31469	FBgn0051469	473.146	1.81617	9.99612701440681e-09	1.31594288187325e-07
CG7730	FBgn0036689	6.24821	1.81017	0.00127017	0.00532121
Ku80	FBgn0041627	453.626	1.80605	2.02311393868871e-33	5.18744805824681e-31
dgt5	FBgn0033740	14.9286	1.79558	0.000440977	0.00211078
arg	FBgn0023535	24.8061	1.786	0.000375638	0.00184741
ntc	FBgn0035461	90.5349	1.78547	5.60807487505849e-14	1.59773486718207e-12
CR45140	FBgn0266633	34.3593	1.78258	7.90653559606606e-05	0.000464158
Mcm6	FBgn0025815	202.459	1.78017	7.50264621173707e-17	3.1583900955529e-15
Rbf2	FBgn0038390	22.1845	1.77547	2.73686642065883e-06	2.27373541663276e-05
CG30287	FBgn0050287	7.66682	1.76881	0.00124947	0.00525011
grp	FBgn0261278	826.498	1.76413	4.56127783786875e-24	4.43623591093408e-22
CR44744	FBgn0265957	17.2406	1.76279	0.000104285	0.000593613
RnrS	FBgn0011704	793.3	1.7597	3.19715143638929e-10	5.43226844959999e-09
CG4269	FBgn0034741	107.025	1.75927	5.82090150526797e-05	0.000354981
Hus1-like	FBgn0026417	156.915	1.7425	4.13701734401454e-19	2.22256331786534e-17
Spc25	FBgn0087021	12.7487	1.7402	0.00226911	0.00881548
CR45082	FBgn0266457	26.0886	1.73937	7.19387301704169e-05	0.000428292
Ance-4	FBgn0033366	35.1256	1.73371	0.0012743	0.00533455
Ugt86Di	FBgn0040251	182.177	1.70725	1.65650214862032e-08	2.0998491281724e-07
mad2	FBgn0035640	20.1873	1.7055	6.22903422367964e-05	0.000377422
CycA	FBgn0000404	150.71	1.70163	2.51871162974683e-07	2.59982658799668e-06
CG34261	FBgn0085290	14.1494	1.69266	7.26187753004466e-05	0.000431514
CG5999	FBgn0038083	3260.8	1.68805	0.00013908	0.000764298
wus	FBgn0030805	26.5457	1.68518	4.28490020805729e-05	0.000269918
Ercc1	FBgn0028434	73.7654	1.68496	1.88919290243992e-12	4.48713143691099e-11
CG3038	FBgn0040373	38.888	1.68335	6.48227251251899e-08	7.3797173043632e-07
Sema-2b	FBgn0264273	40.97	1.68106	6.88107905026805e-05	0.000411406
Cht5	FBgn0038180	81.2123	1.67703	0.00015641	0.00084756
MRE23	FBgn0262741	95.7819	1.67487	8.82301432800562e-11	1.6371915731671e-09
Ctf4	FBgn0033890	106.653	1.67016	9.55357496306848e-13	2.33803541720908e-11
fzy	FBgn0001086	38.9555	1.66497	3.96179532818267e-05	0.000251672
spz	FBgn0003495	35.8077	1.66074	1.50926078723364e-05	0.000106071
dimm	FBgn0023091	13.8698	1.65819	0.000120828	0.00067484
CG8620	FBgn0040837	151.043	1.65765	4.79950788307011e-05	0.000298336
dnk	FBgn0022338	244.364	1.65753	1.64261971543904e-14	4.9287328802083e-13
CG44006	FBgn0264748	33.3562	1.65064	2.1111923486225e-07	2.19930490093804e-06
CG8398	FBgn0035708	802.809	1.6472	2.69228719827328e-12	6.24987328619734e-11
CR45048	FBgn0266408	57.3038	1.64355	4.39394531425252e-08	5.19083675763319e-07
Gcn5	FBgn0020388	1417.36	1.64224	9.64283406629113e-65	2.71976134839741e-61
MtnD	FBgn0053192	3887.62	1.63562	4.76236390697504e-06	3.74418045982526e-05
CG13599	FBgn0039128	12.6848	1.62912	0.00136767	0.00567556
CG15892	FBgn0029859	8.27001	1.62544	0.00173838	0.00699193
CG34236	FBgn0085265	2044.47	1.62516	1.82929282036526e-09	2.75174421324812e-08
Hex-A	FBgn0001186	8757.68	1.62361	6.12522066539508e-24	5.75872829558227e-22
CG10445	FBgn0037531	76.9908	1.62311	4.5833137081174e-15	1.51491303642379e-13
Cyp6a23	FBgn0033978	15302.8	1.62084	2.29196068937694e-14	6.75141005157979e-13
p53	FBgn0039044	527.27	1.62039	8.83437419422286e-18	4.13566015183495e-16
spn-E	FBgn0003483	12.2246	1.61554	0.000347317	0.00172087
CG16892	FBgn0030122	186.532	1.60805	4.38799465730436e-15	1.46033497710053e-13
CG42337	FBgn0259239	8.13896	1.60669	0.00136648	0.00567415
Fancd2	FBgn0038827	24.02	1.59918	0.00145541	0.00598614
msd1	FBgn0035209	10.9909	1.59684	0.00138191	0.00572976
CG13877	FBgn0035112	12.7382	1.59223	0.000439118	0.00210635
Cdc6	FBgn0035918	66.4574	1.59057	2.47887272933461e-09	3.61326125740995e-08
zuc	FBgn0261266	20.5503	1.5865	2.02218557393093e-05	0.000137188
CR45028	FBgn0266388	14.6301	1.58426	0.000211253	0.00111268
msb1l	FBgn0027949	26.6162	1.58251	0.00031923	0.00160202
phr	FBgn0003082	181.903	1.58121	1.13206103995861e-13	3.12271703002764e-12
ImpL2	FBgn0001257	869.842	1.58108	6.59340864954341e-06	5.02274384768054e-05
Orc1	FBgn0022772	71.4732	1.5772	1.13815412315718e-06	1.02807484527296e-05
GstD8	FBgn0010044	247.171	1.57525	9.17901790229062e-05	0.000530457
spd-2	FBgn0027500	27.2332	1.57161	0.000503082	0.00236786
CG8924	FBgn0030710	35.8665	1.57156	5.65075982467039e-07	5.47989399753162e-06
dgt6	FBgn0039638	25.3997	1.56798	0.000143606	0.000786486
CG8500	FBgn0037754	13.1316	1.55918	0.000282994	0.00143947
Mmp2	FBgn0033438	227.865	1.55877	1.28854916162256e-05	9.20672048222022e-05
Incenp	FBgn0260991	53.4904	1.55746	1.92502384802175e-05	0.00013099
CG14274	FBgn0032023	34.7021	1.55638	0.00154973	0.00632336
HmgD	FBgn0004362	621.467	1.54659	6.38040404523936e-09	8.7571433623346e-08
CG6425	FBgn0039449	14.7172	1.54077	9.0452822776159e-05	0.000523865
CG10916	FBgn0034312	498.369	1.53979	1.74187894608356e-36	5.95511462718628e-34
Arc2	FBgn0033928	830.847	1.53844	1.02091475320323e-11	2.20228685385063e-10
CG14907	FBgn0038455	1258.54	1.5317	2.73930832366199e-14	7.98575620350247e-13
tsl	FBgn0003867	81.2823	1.53158	1.30005487012927e-08	1.68202053266036e-07
CR45280	FBgn0266818	11.0356	1.52943	0.00102817	0.00441058
CG3679	FBgn0027521	27.7555	1.52817	0.000439897	0.00210829
CG8097	FBgn0030660	114.272	1.52397	8.05798621081257e-14	2.26144777190018e-12
Fen1	FBgn0025832	160.331	1.51818	3.88685412161589e-16	1.47152644966679e-14
esc	FBgn0000588	60.2845	1.51793	6.88184135479737e-12	1.51052401098879e-10
CG18528	FBgn0039189	208.137	1.51609	3.72297668644994e-08	4.46836414643918e-07
CG32647	FBgn0052647	69.5427	1.51081	4.79855801141051e-08	5.63343719924385e-07
CG8173	FBgn0030864	22.9007	1.50752	4.75914174292238e-05	0.00029599
Cda5	FBgn0051973	42.9864	1.50615	7.69946343071521e-05	0.000454317
asl	FBgn0261004	70.29	1.50395	9.83923799722483e-08	1.09150720830571e-06
CG11164	FBgn0030507	55.0947	1.50318	4.17524769500666e-08	4.95843626263844e-07
LBR	FBgn0034657	205.415	1.49841	1.17478569103201e-25	1.32539321662232e-23
DNApol-alpha50	FBgn0011762	57.1527	1.4925	1.24021717999698e-09	1.93528772126224e-08
tok	FBgn0004885	32.0034	1.49122	0.00113915	0.00483335
FBgn0013984	FBgn0013984	1742.14	1.4859	2.90758093830192e-08	3.54630574550511e-07
Nnf1a	FBgn0034523	42.0152	1.48536	2.28534412227509e-06	1.93713391341153e-05
CG7593	FBgn0039687	71.601	1.48497	8.87851642082881e-09	1.18261419433047e-07
CG43187	FBgn0262816	377.775	1.47846	2.6048481287169e-05	0.000172667
CG9646	FBgn0034184	939.459	1.47476	1.01493433657098e-29	1.73492260381724e-27
GILT3	FBgn0039098	19.2801	1.4646	0.000205145	0.00108405
CG10265	FBgn0033990	47.6603	1.46376	1.9063745967504e-09	2.86006890964601e-08
CG12702	FBgn0031070	26.1141	1.4604	0.00131717	0.00548758
Gr89a	FBgn0038440	84.7874	1.45375	5.2197364644406e-08	6.07730307449112e-07
asf1	FBgn0029094	595.255	1.45258	5.58768477552508e-17	2.40611678005626e-15
kuk	FBgn0038476	120.226	1.45059	2.42731215143474e-06	2.04212794127418e-05
CG3008	FBgn0031643	1471.89	1.44345	9.43087852301516e-29	1.41865561995543e-26
CG42553	FBgn0260755	434.899	1.44342	5.15988873328846e-15	1.69719722125249e-13
ITP	FBgn0035023	419.708	1.44071	7.78006532415757e-06	5.8388731251976e-05
spdo	FBgn0260440	36.7838	1.44028	3.32837569781169e-05	0.000215809
Df31	FBgn0022893	2273.13	1.43976	1.41922390742877e-07	1.53075374030701e-06
Pvf1	FBgn0030964	1134.18	1.43526	7.32834528059414e-07	6.90136823503031e-06
dUTPase	FBgn0250837	300.856	1.4333	8.948663290593e-08	9.98603553357767e-07
CG8369	FBgn0040532	84.0068	1.42269	4.7470011851609e-06	3.73470483758615e-05
Nup37	FBgn0039301	165.424	1.42215	1.30338091416996e-15	4.6096374525597e-14
CG5664	FBgn0037082	190.558	1.41826	1.8250876228606e-13	4.90253299074125e-12
icln	FBgn0029079	123.462	1.41318	5.87855354270521e-13	1.47381869041778e-11
Archease	FBgn0038893	728.711	1.41173	3.55516270294522e-08	4.27604963908614e-07
CG9777	FBgn0030764	16.1875	1.40838	0.00025517	0.00131815
mus301	FBgn0002899	69.7603	1.40623	8.75653907733811e-08	9.79100831224267e-07
Klp61F	FBgn0004378	66.5325	1.40387	6.34735682137208e-05	0.000383973
Ppn	FBgn0003137	1472.3	1.39801	3.86933356355456e-08	4.63416361613828e-07
kek6	FBgn0039862	43.6905	1.39658	6.27767782371889e-07	6.00718924573338e-06
mus205	FBgn0002891	268.542	1.39628	3.60316870760822e-21	2.55666348171295e-19
Sep5	FBgn0026361	18.0938	1.39357	0.000764716	0.00341144
GstD3	FBgn0010039	87.0829	1.38954	2.23181159046591e-07	2.31214861006763e-06
thr	FBgn0003701	29.8406	1.38564	0.000243732	0.00126777
CG12520	FBgn0036324	22.8648	1.38465	0.000520947	0.00243974
Cyp6a8	FBgn0013772	54.7327	1.3845	2.42189141411369e-05	0.000161393
ncd	FBgn0002924	74.58	1.37588	1.31102869599688e-05	9.3436675604781e-05
CG5674	FBgn0032656	395.564	1.37433	4.13955149667304e-10	6.96012220349706e-09
DNApol-eta	FBgn0037141	61.2346	1.37223	4.5147959913186e-08	5.3224585552828e-07
rudhira	FBgn0266019	5438.26	1.37	3.98169062988579e-13	1.02326728214969e-11
wac	FBgn0035120	68.7185	1.35405	6.09960180543778e-07	5.8616445970144e-06
Oseg4	FBgn0035264	1593.13	1.35274	1.81067724166913e-05	0.000124484
Atg18b	FBgn0032935	1056.1	1.35226	2.7734141882271e-07	2.84451444287074e-06
CR45314	FBgn0266853	177.299	1.35018	1.02443345520865e-05	7.49038123244591e-05
hdly	FBgn0038842	549.262	1.34461	1.02775134168669e-10	1.8884512437963e-09
CG34423	FBgn0085452	218.291	1.34037	2.22213833863488e-09	3.27286745907033e-08
CREG	FBgn0025456	1956.36	1.34017	1.01836200001586e-10	1.88038626582306e-09
CG18596	FBgn0038953	680.19	1.33926	2.58915936426695e-21	1.89681142517271e-19
r	FBgn0003189	632.117	1.33913	1.60798780990436e-24	1.65829328528992e-22
RhoGEF4	FBgn0035761	59.7288	1.33727	0.000661211	0.00299349
exu	FBgn0000615	425.783	1.33366	2.18822403576839e-33	5.48612079367532e-31
Syn2	FBgn0034135	38.3023	1.32998	0.000990763	0.0042647
Tsp42Ee	FBgn0029506	1283.81	1.32876	9.69403200520987e-07	8.84854927854189e-06
RfC4	FBgn0260985	184.666	1.3276	1.58156461660161e-12	3.79642808606369e-11
CG10405	FBgn0038431	149.342	1.32608	0.00131876	0.00549217
Sld5	FBgn0039403	62.6857	1.32573	9.03947562474925e-09	1.19839440656194e-07
mre11	FBgn0020270	323.915	1.32128	2.33723944816753e-14	6.8668581912047e-13
Akap200	FBgn0027932	4594.45	1.31811	0.000547236	0.0025428
CG33926	FBgn0053926	1992.48	1.31339	0.00244326	0.00937263
obe	FBgn0038344	1518.11	1.30843	7.16420908990373e-22	5.57424875533061e-20
Socs36E	FBgn0041184	2375.45	1.30285	2.03806180811136e-07	2.12508441026917e-06
CG10268	FBgn0032811	82.5221	1.30242	3.39980670830471e-08	4.10670442003145e-07
Jupiter	FBgn0051363	715.627	1.30014	9.12938568387909e-15	2.85595912624702e-13
CG12253	FBgn0026148	53.8071	1.29505	7.88546343254642e-08	8.9052851297286e-07
CG1688	FBgn0027589	13.9821	1.29266	0.000905367	0.0039392
MRP	FBgn0032456	14312.2	1.29169	2.47088621891323e-11	5.05926285331744e-10
Oseg6	FBgn0034452	74.7336	1.29119	1.65741276388963e-07	1.75412108838676e-06
Uch	FBgn0010288	1289.29	1.29118	5.82335956722561e-21	3.95777967695418e-19
DNA-ligI	FBgn0262619	99.0075	1.28646	3.11908133303534e-12	7.1367967007334e-11
CG9945	FBgn0034527	601.296	1.28586	2.24950135096524e-13	5.95748221633564e-12
CG14906	FBgn0015351	382.144	1.28386	1.18635130798835e-06	1.06989731868302e-05
CG2017	FBgn0037391	880.472	1.28031	4.26465955596795e-11	8.45586803346755e-10
jumu	FBgn0015396	83.1079	1.27325	0.000276997	0.00141534
CG14561	FBgn0037149	40.9323	1.26971	5.78354007836156e-07	5.57691445846796e-06
mars	FBgn0033845	53.0136	1.26947	2.5913318439298e-05	0.000171973
trsn	FBgn0033528	310.274	1.26914	4.59518058499909e-11	9.01614388868865e-10
Lrt	FBgn0034540	13.8478	1.26785	0.00217607	0.00848909
Ada	FBgn0037661	72.0172	1.26724	1.184347711329e-07	1.29474911620289e-06
Spn27A	FBgn0028990	332.331	1.26547	1.94431107544441e-05	0.000132223
msd5	FBgn0035210	34.9064	1.26432	3.82295865309639e-05	0.000244395
RanGAP	FBgn0003346	468.219	1.25677	3.595678528233e-32	7.80123945298552e-30
Caf1-105	FBgn0033526	72.7897	1.25631	1.55214261248498e-09	2.37280121328666e-08
Msh6	FBgn0036486	85.3778	1.25274	1.73867677425633e-05	0.000120121
Hsp70Bb	FBgn0013278	1600.16	1.25239	1.09410360796955e-15	3.90622686870646e-14
His2Av	FBgn0001197	1738.29	1.2521	1.57403820364477e-28	2.30627259915849e-26
dgt4	FBgn0026085	24.8487	1.24801	0.000279397	0.00142438
CG2065	FBgn0033204	1205.45	1.24636	0.000185484	0.000986622
Sytalpha	FBgn0261089	106.695	1.24327	2.53713863819933e-05	0.000168575
CG8478	FBgn0037746	60.1524	1.24238	0.000132708	0.000732849
AdamTS-A	FBgn0038341	245.588	1.23515	6.30031590183335e-07	6.01864216803419e-06
Xpac	FBgn0004832	102.37	1.232	7.77772166654672e-09	1.04462209335691e-07
pbl	FBgn0003041	196.567	1.22961	8.46183525581742e-08	9.51808827080081e-07
onecut	FBgn0028996	17.4951	1.22852	0.00207071	0.00813147
CG17047	FBgn0033827	104.895	1.22846	2.82240846725981e-12	6.52508449336581e-11
Dh31	FBgn0032048	278.923	1.22693	3.99697726106747e-05	0.000253479
Irbp	FBgn0011774	404.519	1.22617	2.12307183845008e-16	8.25948154530821e-15
timeout	FBgn0038118	91.5433	1.22578	3.7311513306738e-07	3.75511590657108e-06
Gen	FBgn0263831	24.4275	1.22369	0.000508004	0.00238705
Kat60	FBgn0040208	808.805	1.22325	4.30877403499874e-13	1.10230359779718e-11
CG6654	FBgn0038301	222.159	1.21109	2.6205218205533e-13	6.85956547087757e-12
Wsck	FBgn0046685	176.417	1.20824	1.87506759259945e-05	0.000127899
Gli	FBgn0001987	7477.37	1.1982	4.46233700643978e-11	8.81682768943144e-10
CR45999	FBgn0267661	289.864	1.194	3.41086420042519e-06	2.77617127811733e-05
Zwilch	FBgn0061476	41.6336	1.19197	4.00249155788065e-05	0.000253686
AnxB10	FBgn0000084	306.094	1.18853	1.97720451748499e-05	0.000134217
AstC-R1	FBgn0036790	32.0226	1.18766	0.00183376	0.00732856
CG9747	FBgn0039754	60.8669	1.18388	5.58166538056102e-06	4.30926477744837e-05
CG11878	FBgn0039310	8603.44	1.18338	0.000213314	0.00112249
Mps1	FBgn0000063	17.0414	1.18269	0.00256858	0.00976374
Cyp304a1	FBgn0038095	33.6973	1.18125	0.00092395	0.00401386
Or35a	FBgn0028946	28.4158	1.17978	0.00166771	0.00674859
Ant2	FBgn0025111	79.7841	1.17874	1.16802841455998e-07	1.27938801680249e-06
CG5780	FBgn0032446	63.9177	1.17296	9.35949868534662e-07	8.56350310588521e-06
CG42335	FBgn0259237	6159.11	1.17267	9.1437727479414e-09	1.21079864016755e-07
Ibf2	FBgn0037669	117.919	1.1702	4.25561837359915e-06	3.39546580558314e-05
CG2051	FBgn0037376	367.132	1.16929	1.63547532376462e-12	3.917501614164e-11
CG12018	FBgn0027903	103.208	1.16876	4.3437575924273e-11	8.597591782064e-10
CCHa1	FBgn0038199	302.319	1.16811	1.67778728286342e-05	0.000116128
FeCH	FBgn0266268	1438.98	1.1678	1.95421501903783e-19	1.09688825098432e-17
CG15529	FBgn0039748	128.039	1.16563	1.84698014705253e-05	0.000126466
CG13928	FBgn0035246	47.7171	1.16135	0.000328264	0.00164088
CG34010	FBgn0054010	106.711	1.16119	2.29519598648538e-06	1.94402410807268e-05
Sox14	FBgn0005612	934.058	1.15893	1.51086262772086e-05	0.000106071
Naam	FBgn0051216	185.023	1.15879	1.11507986704084e-08	1.45358315939506e-07
Sox100B	FBgn0024288	354.296	1.15569	0.000218947	0.00114945
CG11788	FBgn0034495	89.0633	1.15409	2.90019718377163e-07	2.96645735515064e-06
CG4577	FBgn0031306	676.924	1.14987	5.23396548476539e-06	4.07238611028436e-05
Lig4	FBgn0030506	374.25	1.14368	5.77314245010279e-14	1.63649731462462e-12
CG3226	FBgn0029882	992.596	1.14167	9.77363002152746e-13	2.38671198923967e-11
chn	FBgn0015371	108.354	1.13766	4.66832518974304e-07	4.61009893614337e-06
CG31249	FBgn0051249	277.118	1.13415	1.17800722962208e-10	2.13670057308622e-09
bip1	FBgn0026263	135.335	1.13413	2.42744922799874e-07	2.50791961449467e-06
CG7191	FBgn0031945	231.895	1.12997	0.0020853	0.00818593
CG9344	FBgn0034564	307.847	1.12905	8.25740974046217e-06	6.15730976152639e-05
CG10433	FBgn0034638	476.375	1.12783	4.42117430460699e-06	3.52257687179209e-05
CG18428	FBgn0039149	135.116	1.12104	6.71941634554531e-08	7.63428551968199e-07
CR45835	FBgn0267485	32.9477	1.11778	9.07029652835166e-05	0.000525044
CG6272	FBgn0036126	257.866	1.1168	2.17871198596914e-08	2.69815901489614e-07
Npc2a	FBgn0031381	1426.03	1.11663	0.00254901	0.00970567
AstA	FBgn0015591	852.622	1.11434	0.000276905	0.00141534
vret	FBgn0263143	23.1222	1.11389	0.00170001	0.00685964
GAPsec	FBgn0035916	281.626	1.11186	2.10774261371743e-05	0.000142563
CR43270	FBgn0262951	200.033	1.11024	2.07835856743767e-08	2.58523057969479e-07
CG33158	FBgn0053158	665.247	1.1091	8.6769058274705e-10	1.39052345945344e-08
Gadd45	FBgn0033153	1176.91	1.10843	0.000179944	0.000960782
CG6005	FBgn0038672	332.902	1.10594	2.60535895419099e-09	3.75397953016383e-08
spi	FBgn0005672	595.475	1.10362	2.01682742108938e-07	2.10488871089088e-06
Mtl	FBgn0039532	292.989	1.09769	4.25828722626425e-08	5.04642820238585e-07
Lhr	FBgn0034217	26.4144	1.09755	0.000609437	0.00278613
CG6171	FBgn0026737	353.204	1.09699	5.46244022452804e-06	4.23264083881355e-05
c11.1	FBgn0040236	2761.53	1.09683	2.6474209301135e-10	4.52548529296069e-09
Lam	FBgn0002525	758.904	1.09599	4.32832819813927e-20	2.66842616018619e-18
CG11899	FBgn0014427	656.868	1.09452	8.06957806229419e-06	6.02521374578445e-05
CG8089	FBgn0033993	67.6789	1.09451	9.76596797456025e-06	7.17782740644878e-05
CR45126	FBgn0266619	61.2577	1.09249	5.94292414873814e-05	0.000361445
nbs	FBgn0261530	458.527	1.08978	3.72057422169391e-18	1.81712200732254e-16
spel1	FBgn0015546	116.182	1.08725	7.61701351301763e-09	1.02425681113069e-07
CG9135	FBgn0031769	252.03	1.08546	4.40948369625669e-15	1.46317044297553e-13
CG33107	FBgn0053107	111.605	1.08545	2.18124004372098e-05	0.000147006
Mink	FBgn0039250	49.2908	1.08416	0.000316869	0.00159239
CG33947	FBgn0083068	26.4969	1.08355	0.0015511	0.00632663
CR12628	FBgn0042701	65.7654	1.08034	3.35930399301263e-05	0.00021719
hng2	FBgn0037634	65.824	1.0803	1.77293306209019e-07	1.86067263316293e-06
dome	FBgn0043903	1840.82	1.07958	6.17144564595332e-12	1.37059546806388e-10
Cnb	FBgn0035295	57.8632	1.07866	0.00040096	0.00195236
Sema-2a	FBgn0011260	677.682	1.0782	3.88797888791998e-05	0.000247401
CG6540	FBgn0030943	226.448	1.0766	1.30512019325523e-10	2.36346164049848e-09
Psf3	FBgn0030196	107.306	1.07639	2.37770853848389e-08	2.93172762089347e-07
CR44938	FBgn0266243	43.7705	1.07428	2.84716298635085e-05	0.000187189
Psa	FBgn0261243	4353.22	1.07394	1.11576229040606e-08	1.45358315939506e-07
Cp110	FBgn0031191	63.3242	1.07258	9.33052582683013e-06	6.8982301689579e-05
CG30054	FBgn0050054	47.822	1.06328	1.25248419940518e-05	8.97176300805665e-05
CG3408	FBgn0036008	173.024	1.06037	5.37083302361673e-09	7.43481449968638e-08
CDC45L	FBgn0026143	197.474	1.0592	5.03754809620106e-13	1.28003643291307e-11
Blm	FBgn0002906	74.8719	1.05818	1.01541934519503e-05	7.43893574837034e-05
CG3430	FBgn0031875	90.3902	1.05593	1.04257385654745e-05	7.60822655211404e-05
sra	FBgn0086370	1484.09	1.05578	8.33950528686213e-07	7.73736008605087e-06
ICA69	FBgn0037050	32.071	1.05389	0.00232545	0.00900335
Ntf-2	FBgn0031145	1812.19	1.05237	3.99395999100847e-22	3.23699825198759e-20
Psf1	FBgn0035194	56.3082	1.05156	1.72195708167033e-05	0.000119112
NetA	FBgn0015773	1002.34	1.04943	7.36904541618183e-05	0.000436876
Kah	FBgn0035144	39.2461	1.04502	0.00236958	0.0091522
Pi4KIIalpha	FBgn0037339	1632.93	1.04278	2.20353716283568e-23	1.973040180247e-21
CG9662	FBgn0031529	92.3313	1.04256	2.29801329524032e-06	1.94495018731442e-05
CR44526	FBgn0265719	125.292	1.04184	0.000281391	0.00143325
CG14946	FBgn0032405	102.803	1.03818	0.00014815	0.000807842
CG12868	FBgn0033945	803.495	1.03764	0.000545946	0.00253859
CG10910	FBgn0034289	9538.19	1.03131	0.000959124	0.00415547
MED19	FBgn0036761	639.505	1.0302	2.28329480144097e-06	1.93685202630504e-05
Cdk2	FBgn0004107	63.8987	1.02998	2.42022757470476e-06	2.03768712670292e-05
armi	FBgn0041164	301.701	1.02885	1.14033413826438e-17	5.31621890409037e-16
brk	FBgn0024250	758.464	1.02834	3.35511313836534e-05	0.000217043
sli	FBgn0264089	1225.9	1.02527	3.4671721702397e-05	0.000223396
mnd	FBgn0002778	179.56	1.02518	0.00113351	0.00481306
CG4300	FBgn0036272	622.828	1.02298	1.37837785276377e-25	1.53520698803205e-23
DNApol-delta	FBgn0263600	123.98	1.01886	7.31321942409777e-09	9.90489094149713e-08
Fit2	FBgn0036688	60.0096	1.01879	0.000527842	0.00246691
CG17230	FBgn0046225	85.7126	1.01876	7.34473294303702e-05	0.000435664
Hsp60	FBgn0015245	8736.41	1.01849	5.15261730611482e-22	4.09379073574559e-20
Ssl2	FBgn0041780	54.2914	1.018	0.000757598	0.00338236
La	FBgn0011638	2205.29	1.0172	5.08025246908351e-06	3.97471625216367e-05
CG13313	FBgn0035941	172.423	1.0169	3.98949505227283e-05	0.000253289
cv	FBgn0000394	149.392	1.01645	2.06099769202852e-05	0.000139569
CG15445	FBgn0031161	839.986	1.01635	1.95780652949692e-14	5.81262454362744e-13
CR44953	FBgn0266258	59.7942	1.01359	0.000108078	0.000612119
DOR	FBgn0035542	2442.47	1.01263	8.5597014112158e-08	9.60901008172505e-07
bcn92	FBgn0013432	231.639	1.01181	3.20159962834022e-09	4.53205106736943e-08
CG30414	FBgn0050414	51.991	1.0088	0.000543647	0.0025309
tinc	FBgn0261649	32.5275	1.00746	0.000966203	0.00417812
Nnf1b	FBgn0051658	73.2061	1.00591	3.81183148208126e-07	3.8263997320216e-06
CG15083	FBgn0034399	343.865	1.00175	0.000801034	0.00354755
MED4	FBgn0035754	141.923	1.00128	0.000450069	0.00214974
sowah	FBgn0036302	1643.1	1.00015	2.43601928086161e-09	3.55999605267884e-08
Caf1-180	FBgn0030054	141.547	1.00005	2.74424881640931e-06	2.27819096002427e-05
Cyp12e1	FBgn0037817	225.209	-1.00214	1.53304083249235e-05	0.000107365
sta	FBgn0003517	47579.5	-1.00429	6.64365487372732e-08	7.5558179723177e-07
CG6950	FBgn0037955	1735.55	-1.00494	6.5118576105329e-16	2.38528498578027e-14
CG30089	FBgn0050089	41.0697	-1.00807	0.000767835	0.00342184
Cyp6a21	FBgn0033981	950.475	-1.00847	1.04999827569078e-08	1.37585139911073e-07
CG5724	FBgn0038082	3602.43	-1.00911	0.00172464	0.00694412
CdsA	FBgn0010350	1271.7	-1.00981	7.76114089039438e-15	2.49462084118033e-13
RpL3	FBgn0020910	50200.3	-1.01243	1.15735830612614e-10	2.10942106780534e-09
ham	FBgn0045852	467.265	-1.01297	6.45347425110488e-05	0.000388932
CG10178	FBgn0032684	575.012	-1.01376	0.000561213	0.00260131
RpS20	FBgn0019936	23056.9	-1.0138	1.33666888101298e-09	2.06296830582606e-08
CG12991	FBgn0030847	815.01	-1.01459	4.99940369122877e-10	8.30681479299603e-09
Argk	FBgn0000116	41567.6	-1.01505	8.79856854154275e-09	1.17335047619013e-07
UK114	FBgn0086691	1462.43	-1.01518	5.02050997412202e-05	0.000310024
CG4019	FBgn0034885	1487.58	-1.01717	5.94501624796513e-11	1.14261794394451e-09
AMPdeam	FBgn0052626	3687.51	-1.01865	7.8835992218028e-15	2.51141417844119e-13
CG33080	FBgn0053080	3073.53	-1.02052	4.51156050195866e-05	0.000283247
CG11275	FBgn0034706	95.016	-1.02096	3.44397109317416e-05	0.000222155
CR45604	FBgn0267164	491.097	-1.02096	0.000664972	0.00300768
blow	FBgn0004133	65.9344	-1.0224	4.11704641430514e-05	0.000260216
CG5171	FBgn0031907	140.155	-1.02542	0.00142778	0.00589398
Lsd-1	FBgn0039114	1685.97	-1.02568	0.00116586	0.00493002
CG31731	FBgn0028539	2114.95	-1.02741	1.0596928364384e-11	2.28157530165992e-10
Tsp42Ec	FBgn0033124	5370.98	-1.02757	7.53958086208605e-08	8.53175037974472e-07
Cyp9c1	FBgn0015040	1204.79	-1.02874	9.24609095690637e-14	2.57566415248933e-12
CR45885	FBgn0267545	62.5164	-1.03419	0.000320179	0.00160545
ft	FBgn0001075	22.485	-1.03699	0.000814302	0.00359579
CR44998	FBgn0266349	38.7766	-1.03705	0.000496845	0.00234438
Cyp28a5	FBgn0028940	1324.75	-1.04071	0.000522075	0.002444
Fst	FBgn0037724	5924.62	-1.04174	0.00127508	0.00533584
Cyp6g1	FBgn0025454	3013.43	-1.04235	0.00223836	0.00870797
osp	FBgn0003016	223.274	-1.04254	5.26264940120854e-11	1.02721817550925e-09
CG6051	FBgn0039492	2364.72	-1.04278	1.84733361780797e-05	0.000126466
colt	FBgn0019830	3264.9	-1.04534	2.91886884870305e-10	4.97442271164167e-09
Cyp9f2	FBgn0038037	8366.88	-1.04598	7.85873689307296e-06	5.8872688995783e-05
CG43103	FBgn0262563	50.2361	-1.04757	0.000207744	0.00109727
CG6424	FBgn0028494	2423.23	-1.04771	1.32823667305969e-08	1.71259041662394e-07
cln3	FBgn0036756	2975.66	-1.04795	5.03176191258448e-07	4.92780710918213e-06
ect	FBgn0000451	148.348	-1.05224	6.70072186280928e-05	0.000402329
Tsp74F	FBgn0036769	59.6987	-1.05314	0.000138239	0.000760417
CG7231	FBgn0031968	4519.35	-1.0544	1.73166076847535e-06	1.50166001459945e-05
CG8405	FBgn0034071	1093.7	-1.05576	1.19012137774313e-16	4.81252666082366e-15
lectin-37Db	FBgn0053533	6424.28	-1.05641	0.000289174	0.0014643
CG15423	FBgn0031580	4003.09	-1.06118	7.74890033730566e-06	5.82044564617061e-05
hid	FBgn0003997	244.742	-1.06124	0.000113474	0.000637555
Catsup	FBgn0002022	2710.85	-1.06151	4.00530392327291e-10	6.75453495700522e-09
AdipoR	FBgn0038984	5531.24	-1.06503	1.77346206355087e-18	8.81418458192989e-17
per	FBgn0003068	274.547	-1.067	6.6972248459074e-07	6.37491717165326e-06
CG2811	FBgn0035082	816.198	-1.06942	3.22829234961742e-22	2.65851053199881e-20
mgl	FBgn0261260	362.648	-1.07318	2.15778375647727e-11	4.45862936640597e-10
GstD7	FBgn0010043	190.886	-1.07389	0.000472748	0.00224381
CG4729	FBgn0036623	5664.04	-1.07526	6.66354515601858e-09	9.1235578216264e-08
santa-maria	FBgn0025697	721.46	-1.07723	5.1301651639798e-08	5.98536953257705e-07
Gclc	FBgn0040319	8977.85	-1.0777	1.54645452827607e-05	0.000108099
sif	FBgn0085447	24.3281	-1.07834	0.000962419	0.00416494
Ttd14	FBgn0050118	2334.25	-1.07923	3.50355579827654e-12	7.96917671696692e-11
LManI	FBgn0032253	8494.31	-1.07946	2.69176411364465e-08	3.28663233010162e-07
CG14523	FBgn0039612	31.5324	-1.08067	8.31431024240824e-05	0.000485496
pyd	FBgn0262614	670.818	-1.08254	7.39229699322523e-21	4.93490501050693e-19
CG13917	FBgn0035237	1105.35	-1.08344	1.53310965269491e-05	0.000107365
Mis12	FBgn0035725	71.5111	-1.08766	4.81846475171245e-06	3.78564897833007e-05
Ugt86Dh	FBgn0040252	2124.11	-1.08947	2.20575363102423e-06	1.87530613905165e-05
CG5921	FBgn0029835	1962.39	-1.09084	9.16883584433174e-26	1.04487682823991e-23
CG15456	FBgn0040650	67.2821	-1.09576	5.76336418043366e-05	0.000352424
CG30345	FBgn0050345	1377.28	-1.09583	8.94316525528864e-07	8.24994197957207e-06
MYPT-75D	FBgn0036801	2461.88	-1.09674	2.85434598254203e-19	1.54080054426025e-17
Nep2	FBgn0027570	72.6376	-1.09737	0.0005341	0.00249099
RpL22	FBgn0015288	10164	-1.10098	1.3272028806175e-07	1.44531881265701e-06
Hipk	FBgn0035142	1868.76	-1.10158	1.51073539589881e-05	0.000106071
CG10877	FBgn0038804	672.938	-1.10248	1.92091137404629e-10	3.37565765140035e-09
bol	FBgn0011206	376.867	-1.10249	2.04763447381533e-05	0.000138831
dpy	FBgn0053196	213.674	-1.10328	2.37019490832869e-07	2.45326045465728e-06
CG10477	FBgn0035661	9688	-1.10349	4.58169282688598e-11	9.00534119737414e-10
CG32107	FBgn0052107	863.906	-1.1042	0.00197744	0.00782512
Ance	FBgn0012037	25383.7	-1.10451	1.93898294027735e-14	5.78719723074314e-13
LManVI	FBgn0032069	85815.5	-1.10567	0.000543777	0.0025309
CG18622	FBgn0038460	505.59	-1.10602	1.32977790409199e-17	6.17389066418347e-16
Pallidin	FBgn0036192	424.978	-1.10608	1.19943713820641e-11	2.55321694212164e-10
tna	FBgn0026160	1286.17	-1.10674	4.30547809826123e-07	4.29183254214264e-06
CG17027	FBgn0036553	177.91	-1.10709	0.000231928	0.00121252
Slob	FBgn0264087	51.4274	-1.10853	7.33260433689375e-05	0.000435173
Amy-d	FBgn0000078	10547.1	-1.10906	6.34278623432849e-05	0.000383902
Irk2	FBgn0039081	1628.7	-1.11116	1.77198680296217e-05	0.000122044
Amph	FBgn0027356	1087.22	-1.11767	1.11411649644598e-05	8.0625159159099e-05
CG4364	FBgn0032138	3875.74	-1.11829	1.70563036683043e-06	1.48443896976023e-05
CG1544	FBgn0039827	117.128	-1.11866	1.55717161139042e-05	0.000108713
Eip71CD	FBgn0000565	3735.8	-1.11878	0.000383778	0.0018817
htt	FBgn0027655	1314.64	-1.12	4.59227316483722e-15	1.51491303642379e-13
sr	FBgn0003499	26.5402	-1.12281	0.000579171	0.0026692
odd	FBgn0002985	1713.72	-1.12575	1.04706100651449e-05	7.63603249870487e-05
CG18769	FBgn0042185	137.881	-1.1275	8.53129727433318e-06	6.3531416401998e-05
Mvl	FBgn0011672	2604.72	-1.12893	7.01913308159354e-13	1.74043647091293e-11
Rcd6	FBgn0034530	29.546	-1.12926	0.000376624	0.00184984
Cyp6a9	FBgn0013771	1270.22	-1.12989	1.55175387027136e-23	1.42332415970744e-21
Gagr	FBgn0036627	158.252	-1.13015	4.90657595435252e-07	4.81356434060914e-06
CG7997	FBgn0034117	98.8349	-1.13145	0.000723803	0.00325078
CG15822	FBgn0035308	100.799	-1.1323	1.76578331127916e-05	0.000121696
garz	FBgn0264560	2674.92	-1.13291	1.13919830599669e-10	2.0796820854781e-09
bigmax	FBgn0039509	519.323	-1.13305	1.44679746726008e-15	5.08497477433902e-14
rnh1	FBgn0023171	517.068	-1.1338	6.08797758561617e-17	2.59187030644987e-15
Tehao	FBgn0026760	896.231	-1.1342	4.07482299721956e-06	3.25812565943523e-05
CG4753	FBgn0036622	12360	-1.13455	8.2077483924293e-19	4.2090826074267e-17
CG14629	FBgn0040398	6113.92	-1.13496	5.97179978560824e-10	9.86439900164454e-09
CG8596	FBgn0035767	1329.36	-1.13503	8.72428264163444e-11	1.62421380796897e-09
CG15912	FBgn0029712	67.9045	-1.13647	0.000103697	0.000590565
Mdr49	FBgn0004512	4108.95	-1.13703	0.000770938	0.00343376
Mtap	FBgn0034215	1720.03	-1.14474	9.24648513496056e-25	9.74942479370327e-23
bab1	FBgn0004870	40.3301	-1.14664	0.000578375	0.00266829
ced-6	FBgn0029092	242.949	-1.14783	2.23310435962397e-05	0.000150053
swi2	FBgn0034262	225.22	-1.14802	0.000141795	0.000778079
CG14877	FBgn0038380	118.544	-1.15092	3.32076352549529e-06	2.71484449961144e-05
CG31259	FBgn0051259	3969.84	-1.15241	0.000527283	0.00246532
CG10168	FBgn0039087	204.985	-1.15367	7.09272116276691e-10	1.15136805983218e-08
CG10420	FBgn0039296	685.219	-1.1548	2.69584110659833e-22	2.23635877681194e-20
bmm	FBgn0036449	3971.45	-1.15706	8.23995128540536e-06	6.14835518531371e-05
CG12493	FBgn0035571	241.482	-1.15843	1.1969013428064e-05	8.61738414137955e-05
FBgn0027571	FBgn0027571	4185.37	-1.16209	0.00121399	0.00511817
CR43952	FBgn0264603	77.1717	-1.16282	6.63636323538798e-10	1.0850934785746e-08
CG42541	FBgn0260658	61.8728	-1.16598	8.43302384596498e-05	0.000490926
Galk	FBgn0263199	1367.38	-1.16763	2.99129041584534e-21	2.14953748226542e-19
Cyp49a1	FBgn0033524	277.879	-1.16904	5.6103742049651e-05	0.000343628
RpL24-like	FBgn0037899	2449.59	-1.1695	1.56361731346169e-05	0.000109095
CG6040	FBgn0038679	116.296	-1.17464	3.11852802407653e-08	3.78314335135821e-07
CG2004	FBgn0030060	2330.94	-1.18154	1.30387915308283e-08	1.68503603723717e-07
Efr	FBgn0029849	1664.27	-1.18249	1.0452458528555e-08	1.37121671068788e-07
BG642312	FBgn0047334	83.9343	-1.18341	5.44104602358244e-07	5.29188631362561e-06
Edem2	FBgn0032480	2880.88	-1.18571	1.93855535115495e-09	2.90063414744432e-08
Lpin	FBgn0263593	6167.11	-1.18634	1.11843792058706e-07	1.23224771680305e-06
Lip4	FBgn0032264	683.004	-1.18664	4.2033162732912e-06	3.35610857716003e-05
CG32512	FBgn0052512	1352.05	-1.18708	8.02166043531992e-06	6.00533331328993e-05
CG8128	FBgn0030668	2690.1	-1.19004	7.49318035761474e-28	1.04367976289641e-25
CG3091	FBgn0029608	2917.97	-1.19165	3.56732922505795e-13	9.27341205463222e-12
Nha1	FBgn0031865	4050.15	-1.19206	4.65370652220149e-10	7.77823955310774e-09
Pdcd4	FBgn0030520	713.441	-1.19336	9.06176834878109e-13	2.22249718502061e-11
Acox57D-d	FBgn0034629	2916.63	-1.19418	3.4089934303232e-09	4.80753298511329e-08
CG9485	FBgn0034618	905.473	-1.1943	2.00433659802309e-06	1.72354615083053e-05
CG4562	FBgn0038740	25629.2	-1.19523	4.49755883202467e-06	3.57334216499312e-05
CG5773	FBgn0034290	414.428	-1.19678	3.12911650587112e-07	3.1861635757435e-06
CG13102	FBgn0032088	4485.03	-1.19776	5.61965930155396e-08	6.48271945195621e-07
CG15044	FBgn0030928	2414.47	-1.19927	0.000115232	0.000646149
GlcT-1	FBgn0067102	935.214	-1.20102	0.000563682	0.00260955
CG9981	FBgn0030746	755.908	-1.20207	1.54779576557364e-07	1.64893596102e-06
CG42269	FBgn0259164	106.322	-1.20709	2.52675849789306e-06	2.11318675857891e-05
net	FBgn0002931	100.938	-1.20857	0.000124633	0.000693005
Non1	FBgn0028473	10256.9	-1.21003	5.90966867938935e-05	0.000359616
RapGAP1	FBgn0264895	342.146	-1.21111	1.17209641860737e-10	2.12940286549571e-09
Cyp313a4	FBgn0038076	66.1032	-1.21434	3.82186397570266e-09	5.36964749363355e-08
CG32473	FBgn0052473	12859.2	-1.21568	6.84022735187357e-07	6.48499537679308e-06
CDase	FBgn0039774	4299.6	-1.21609	9.65190402777948e-06	7.10324730863719e-05
sel	FBgn0263260	3577.19	-1.21697	7.38266113815168e-06	5.57131658599514e-05
ZnT63C	FBgn0035432	2644.68	-1.21837	8.18216972594254e-11	1.53086631588862e-09
Ugt36Bc	FBgn0040260	4042.09	-1.21901	4.86107466635432e-08	5.69497864857834e-07
CG31370	FBgn0051370	334.523	-1.22251	9.6547264440242e-12	2.09470430272079e-10
Cyp6d5	FBgn0038194	14581.8	-1.22476	1.76502775052814e-08	2.2249210146881e-07
CG17664	FBgn0034883	3285.75	-1.22733	1.75251701941042e-10	3.10390847927604e-09
cu	FBgn0261808	1198.3	-1.22825	3.74276863113599e-09	5.26507677013419e-08
CG4670	FBgn0033814	2345.51	-1.23055	1.04294255558543e-16	4.34187376830804e-15
Ip259	FBgn0025366	3867.48	-1.23204	9.03998123228784e-07	8.31884732974482e-06
CR43629	FBgn0263620	36.8504	-1.23301	3.50567089923493e-06	2.8413059687621e-05
GstE9	FBgn0063491	2325.55	-1.23871	1.60485403374544e-05	0.000111696
alc	FBgn0260972	2948.73	-1.24802	7.72408749594674e-50	5.12606794878066e-47
CG10939	FBgn0010620	589.725	-1.24869	1.17206068318793e-13	3.22516795798199e-12
CG7120	FBgn0035888	53.8992	-1.24893	7.47120161921515e-07	7.01232157797641e-06
bowl	FBgn0004893	549.364	-1.24944	4.65199267430246e-08	5.4784740450397e-07
P58IPK	FBgn0037718	6036.04	-1.25036	3.60466308193954e-14	1.04276433052415e-12
rut	FBgn0003301	407.253	-1.25039	2.74473961064604e-11	5.57948689861416e-10
CG14356	FBgn0038207	19.189	-1.25049	0.000362404	0.00179091
CG34203	FBgn0085232	362.837	-1.2542	0.00134457	0.00558931
CG9555	FBgn0032085	1901.77	-1.25721	2.40356330487312e-12	5.63763018826997e-11
CG11034	FBgn0031741	5503.81	-1.25879	3.81215502463418e-07	3.8263997320216e-06
vanin-like	FBgn0040069	4692.95	-1.26119	1.70319372294379e-07	1.79388657965325e-06
spheroide	FBgn0030774	10224.6	-1.2612	2.15071577093497e-10	3.74450236538400e-09
CG6484	FBgn0034247	10809.2	-1.26294	0.000309915	0.00156023
Ect3	FBgn0260746	187.349	-1.26416	9.85006065050624e-05	0.000563817
CG31454	FBgn0051454	397.02	-1.26567	7.11161411071197e-09	9.66665426470512e-08
CG10165	FBgn0032801	2042	-1.26733	7.18792895850534e-29	1.09586776364672e-26
Ndae1	FBgn0259111	3638.1	-1.26844	1.66965295876573e-09	2.52507033254624e-08
CG43774	FBgn0264296	3233.49	-1.27012	1.01300564888413e-07	1.12266500301677e-06
alpha-Est10	FBgn0015569	663.537	-1.27466	1.25466081569374e-06	1.12252841575391e-05
Ef1alpha48D	FBgn0000556	150282	-1.2781	3.12733015979558e-14	9.09343785124065e-13
elm	FBgn0037358	5381.96	-1.27922	1.08459400498785e-08	1.41953475223583e-07
CAH1	FBgn0027844	7315.28	-1.2803	2.71306922253343e-09	3.88930711164195e-08
CG18745	FBgn0042102	2225.69	-1.28055	3.20898634897117e-07	3.25866642566091e-06
CG15706	FBgn0034093	943.759	-1.28384	3.71636159837717e-06	2.99914102667319e-05
CG43120	FBgn0262580	943.016	-1.28418	0.000104989	0.000597318
glob1	FBgn0027657	1003.17	-1.285	5.18753020586654e-16	1.93154177500285e-14
CR32218	FBgn0052218	152.541	-1.28867	5.11762980722638e-11	1.00064297201262e-09
CG42324	FBgn0259224	50.9688	-1.28954	0.000896154	0.00390213
mtg	FBgn0260386	49.7327	-1.28982	5.27736285312765e-08	6.13174126766078e-07
Glut1	FBgn0264574	205.842	-1.28994	4.34155637937749e-15	1.44915500213423e-13
CG4666	FBgn0029838	170.012	-1.29042	4.97130199191783e-06	3.90029409407629e-05
Ggt-1	FBgn0030932	1211.16	-1.29201	5.32549674512935e-29	8.23044579158211e-27
CG33306	FBgn0053306	10599.2	-1.29224	0.000418187	0.00202394
CG32564	FBgn0052564	26.0699	-1.2926	0.000365037	0.00180234
LpR1	FBgn0066101	4290.02	-1.29325	6.00463154960732e-08	6.89158221186875e-07
CG9312	FBgn0038179	50.7504	-1.29346	0.00013712	0.000754626
betaTry	FBgn0010357	125265	-1.29428	3.01092730160332e-05	0.000197038
beat-IIIc	FBgn0032629	16.9951	-1.2952	0.000997847	0.00429192
CG8132	FBgn0037687	779.362	-1.29838	3.19690530933804e-16	1.21439345791083e-14
CG13890	FBgn0035169	414.445	-1.30007	7.21524537522648e-08	8.18937608886369e-07
CG7900	FBgn0037548	862.583	-1.30207	1.04081694679854e-08	1.36699613431677e-07
CG5404	FBgn0038354	235.656	-1.30349	0.000211476	0.00111333
CG31436	FBgn0051436	467.995	-1.30517	1.17998001779717e-11	2.52131336378554e-10
CG31038	FBgn0051038	316.075	-1.30557	1.00554854141435e-16	4.21732291607312e-15
unc-104	FBgn0267002	959.193	-1.309	3.84840299208235e-05	0.000245714
CG12338	FBgn0033543	1149.46	-1.30951	2.69077885608229e-17	1.20465742279049e-15
CG15202	FBgn0030271	44.2748	-1.3096	1.74732956736254e-05	0.000120645
CG31886	FBgn0032079	427.639	-1.30962	9.28702223068191e-15	2.89436974603738e-13
CG5455	FBgn0039430	2022.41	-1.31286	5.40597523427975e-11	1.04974548353088e-09
CG10623	FBgn0032727	1581.74	-1.31545	1.0792452453671e-16	4.46008969165994e-15
CG5009	FBgn0027572	5203.18	-1.31954	0.00112678	0.00478808
CR44274	FBgn0265301	36.9515	-1.32032	4.79830763361365e-07	4.73203730091164e-06
CG13004	FBgn0030797	117.075	-1.32241	2.26704309021114e-05	0.000152152
comm3	FBgn0259236	419.078	-1.32574	2.14306735285843e-08	2.65895323165295e-07
Zip71B	FBgn0036461	227.48	-1.32804	0.000391363	0.00191549
pk	FBgn0003090	86.5701	-1.32973	3.82575672744946e-08	4.58684244411103e-07
regucalcin	FBgn0030362	672.79	-1.3314	1.27605523829423e-08	1.65286512037147e-07
Gdh	FBgn0001098	6610.48	-1.33249	8.35620827038884e-15	2.63337267336667e-13
Cyp4ae1	FBgn0015036	2471.15	-1.33539	3.12495795972549e-12	7.1367967007334e-11
CG7737	FBgn0033584	333.523	-1.33557	6.67828921665063e-11	1.26416877419887e-09
CG6034	FBgn0036750	189.363	-1.33569	0.000440961	0.00211078
CG11686	FBgn0040551	899.633	-1.33651	9.73349638503775e-20	5.81022784211618e-18
CG43078	FBgn0262508	3581.01	-1.33788	1.23488377374867e-06	1.10746889788812e-05
stv	FBgn0086708	2231.62	-1.33976	0.000156962	0.000850143
CG14195	FBgn0030998	90.6774	-1.33997	0.0011385	0.0048324
Atox1	FBgn0052446	1286.57	-1.34141	1.20605347999315e-18	6.07441757200121e-17
Oatp33Ea	FBgn0032433	5269.79	-1.34406	2.80551694693878e-12	6.49935158015675e-11
emc	FBgn0000575	2189.41	-1.34435	3.19965245029575e-07	3.2521152202015e-06
CG3706	FBgn0040342	3676.2	-1.34451	0.00019274	0.00102185
Jon65Aiii	FBgn0035665	311188	-1.34522	1.69078747501698e-06	1.47414716330306e-05
CG42672	FBgn0261554	1766.86	-1.34612	2.2606670275886e-12	5.31350945942803e-11
Hexo1	FBgn0041630	3467.37	-1.34986	1.51990557370728e-15	5.32533375234953e-14
CG9510	FBgn0032076	2300.42	-1.35139	1.50788849095909e-17	6.94367263469404e-16
ine	FBgn0011603	883.593	-1.3524	3.08539697702637e-12	7.07509119813241e-11
Phae1	FBgn0263234	2850.93	-1.35374	2.93587807623028e-21	2.12324208051474e-19
ea	FBgn0000533	53.7308	-1.35497	5.89282064815051e-06	4.52571834938285e-05
mira	FBgn0021776	257.659	-1.35524	1.79914472399372e-07	1.88642665205364e-06
CR44047	FBgn0264839	13.853	-1.35883	0.000251078	0.00129998
Galphaf	FBgn0010223	1433.98	-1.35934	7.90431651887118e-09	1.06036265119982e-07
CG16775	FBgn0036767	12001.7	-1.3622	4.62384301395928e-06	3.65565500234678e-05
GLS	FBgn0261625	2943.11	-1.36301	0.00249719	0.0095309
RpS16	FBgn0034743	39096.8	-1.36488	1.37618828020179e-11	2.90751988337764e-10
CG18577	FBgn0037870	906.993	-1.36518	2.37546631815072e-05	0.000158814
28SrRNA-Psi:CR45859	FBgn0267519	31.5274	-1.36887	0.00168872	0.00681956
NAAT1	FBgn0029762	2718.06	-1.36934	3.64291977010928e-11	7.30007475068791e-10
Acsl	FBgn0263120	18755.9	-1.37067	1.7126645706751e-12	4.09370374710943e-11
CG12355	FBgn0040805	322.343	-1.37102	7.10369854662304e-19	3.69326852548392e-17
CG8083	FBgn0025709	6657.58	-1.37324	5.87038661493157e-05	0.000357419
CG11594	FBgn0035484	636.465	-1.37378	9.893406254545e-09	1.30546677618452e-07
RpS24	FBgn0261596	28325.2	-1.37637	2.72604639676049e-17	1.21562274499019e-15
CR45952	FBgn0267614	58.4839	-1.38074	7.23795596182973e-07	6.8333572519969e-06
CG31183	FBgn0051183	436.892	-1.38081	5.5055959473414e-21	3.76449293805489e-19
PKD	FBgn0038603	148.599	-1.38098	1.17463025284773e-09	1.84828152198439e-08
Pdxk	FBgn0085484	3308.65	-1.382	3.395556809051e-21	2.42459948858946e-19
Adi1	FBgn0052068	2238.71	-1.38246	1.37802985356194e-16	5.51309674038505e-15
sima	FBgn0266411	2845.35	-1.38531	5.76282661160462e-14	1.63649731462462e-12
CG1665	FBgn0033451	697.97	-1.38686	7.87557371191886e-15	2.51141417844119e-13
CG17036	FBgn0032449	704.513	-1.38736	1.16693171597983e-08	1.5149969642905e-07
CG9008	FBgn0028540	539.92	-1.38783	1.98762200904334e-08	2.47782889569358e-07
CG42389	FBgn0259735	3120.34	-1.39134	1.80325522336909e-10	3.18377549766042e-09
Csp	FBgn0004179	3095.83	-1.39217	3.14399510798385e-29	5.11946212399093e-27
CG2898	FBgn0030195	36.1396	-1.39359	0.000200545	0.00106074
Notum	FBgn0044028	14.2371	-1.39381	0.00156699	0.00638224
CG11384	FBgn0040363	138.538	-1.3957	1.95070070488998e-10	3.42267579355658e-09
CG34445	FBgn0085474	37.1026	-1.39697	1.46850716457352e-05	0.000103419
CG12541	FBgn0029930	33.1941	-1.39955	1.86770845712434e-05	0.000127629
Jheh3	FBgn0034406	14608.8	-1.4004	1.1345386314783e-15	4.02511472966611e-14
DAAM	FBgn0025641	132.111	-1.40252	0.00144106	0.0059387
CAHbeta	FBgn0037646	129.259	-1.40427	1.07439214635688e-06	9.75164295671626e-06
CG9444	FBgn0037730	37.6864	-1.40684	0.000263162	0.00135447
ACXD	FBgn0040507	1653.44	-1.40692	2.2749610951568e-10	3.93652010361335e-09
l(3)72Dp	FBgn0263607	774.878	-1.40829	2.41791468631793e-13	6.35872109348225e-12
Zip48C	FBgn0033665	993.221	-1.40834	1.81654729380247e-11	3.79523825345915e-10
CG4783	FBgn0038756	2575	-1.40897	5.06454317603409e-05	0.000312401
Pmp70	FBgn0031069	12223.3	-1.40916	3.39216778793879e-08	4.10186891570477e-07
unc-5	FBgn0034013	14.0063	-1.40924	0.00147431	0.00605284
CG15255	FBgn0028950	23868.7	-1.41504	6.53230854545968e-20	3.94104304865647e-18
Cyp4d2	FBgn0011576	381.088	-1.41512	8.0460974775199e-09	1.0781006145057e-07
CG9682	FBgn0039760	4778.62	-1.41554	0.00115812	0.00490372
GstE8	FBgn0063492	799.186	-1.41854	2.47580439105159e-10	4.25793066156159e-09
CR44192	FBgn0265081	496.31	-1.41979	3.59200829114168e-13	9.31610058405986e-12
NaCP60E	FBgn0085434	275.579	-1.42027	4.54952616475037e-12	1.02450607167093e-10
bab2	FBgn0025525	1108.99	-1.42179	1.27335381647045e-13	3.47844497758343e-12
CG9452	FBgn0036877	34.4034	-1.42262	0.000831158	0.00366008
CG8665	FBgn0032945	1131.02	-1.42828	0.000181182	0.000966477
CG42492	FBgn0259994	11.3934	-1.43271	0.0018374	0.00733788
CG8358	FBgn0037727	66.1477	-1.43427	2.62544028772634e-05	0.000173522
C3G	FBgn0259228	1843.82	-1.43603	1.41951878619457e-10	2.55422822102826e-09
Acox57D-p	FBgn0034628	4113.76	-1.43693	3.22002938105945e-12	7.33906494487125e-11
CG9119	FBgn0035189	1215.94	-1.43757	8.29979519976048e-11	1.55030280535923e-09
CG9527	FBgn0031813	22458.2	-1.4377	1.68869126821211e-07	1.78220906342087e-06
Kua	FBgn0032850	368.547	-1.4421	1.41958097875278e-28	2.10733060556433e-26
Mdr65	FBgn0004513	19.5955	-1.44247	8.14461711483946e-05	0.000476595
SLC5A11	FBgn0031998	1054.42	-1.44366	3.03972146303253e-07	3.10073576364674e-06
MtnC	FBgn0038790	2940.77	-1.44519	7.9612423628536e-07	7.41078682654408e-06
CG30049	FBgn0050049	687.916	-1.45606	3.85794891398214e-06	3.10326124136515e-05
CG9673	FBgn0030775	18307.1	-1.45912	2.9108419562129e-15	9.98179907294647e-14
CG1718	FBgn0031170	9044.5	-1.46352	7.81238593523837e-05	0.000460017
CG10799	FBgn0033821	327.138	-1.46763	0.000496097	0.00234281
tim	FBgn0014396	9525.96	-1.46839	1.67728368337746e-15	5.82249677411217e-14
CG11619	FBgn0036836	43.1531	-1.47616	1.68833716589515e-06	1.47371316994523e-05
CG11236	FBgn0031860	352.566	-1.48004	0.000501519	0.00236347
CG42846	FBgn0262035	31.5909	-1.48031	0.000129195	0.000715903
CG42714	FBgn0261631	532.984	-1.48092	0.000278894	0.00142246
wit	FBgn0024179	835.737	-1.48122	1.11928866472715e-19	6.57698683096444e-18
CG31104	FBgn0051104	2054.31	-1.48428	3.58735138329642e-06	2.9054198353446e-05
CR45396	FBgn0266945	11.0891	-1.48613	0.000745816	0.00333741
CG42272	FBgn0259167	11.2992	-1.48684	0.000607222	0.00277805
Sod3	FBgn0033631	1189.51	-1.48714	5.88247665723656e-22	4.60875705881548e-20
28SrRNA-Psi:CR45853	FBgn0267513	11.2927	-1.48804	0.00136116	0.00565414
CG10550	FBgn0039321	2297	-1.48898	6.64473375083254e-15	2.17924087723525e-13
CG3746	FBgn0034755	76.8528	-1.48985	8.15374201424271e-08	9.18069035974913e-07
gol	FBgn0004919	203.435	-1.49377	1.36494709916488e-12	3.29750175005957e-11
CG10062	FBgn0034439	653.601	-1.49471	0.000724357	0.00325197
Ugt86Dd	FBgn0040256	1818.78	-1.49676	1.36369160983364e-05	9.65798414447155e-05
CG13793	FBgn0031935	41.7301	-1.49974	4.62980678384484e-05	0.000289543
Phae2	FBgn0263235	6047.66	-1.50193	1.87719741184706e-13	5.03053235165285e-12
CG10184	FBgn0039094	1992.45	-1.50549	4.21622910563656e-07	4.22446685344509e-06
CG14855	FBgn0038260	46.7148	-1.50611	1.04046716438376e-07	1.15083828907624e-06
fa2h	FBgn0050502	2487.98	-1.5096	3.23942004707147e-11	6.54966612384594e-10
CR41621	FBgn0085827	142.33	-1.50991	2.672393122645e-06	2.22673110854364e-05
CR33013	FBgn0053013	122.123	-1.51406	2.17255238755395e-06	1.85126405108638e-05
CG18748	FBgn0042105	2950.84	-1.51533	7.45305235281935e-09	1.00580546225488e-07
CG13868	FBgn0034501	5206.31	-1.51687	2.93599623320307e-15	1.00375483342415e-13
Ctr1B	FBgn0062412	3389.76	-1.51715	0.00108025	0.00461295
CG16771	FBgn0032779	1634.42	-1.52067	5.14303567383408e-20	3.1534635039237e-18
pirk	FBgn0034647	2880.17	-1.52315	0.00106628	0.00456019
dnc	FBgn0000479	1339.69	-1.52317	6.3530499917464e-27	7.87638571504208e-25
veil	FBgn0034225	10459.9	-1.52654	9.19485853330017e-22	7.10523246388305e-20
CG16965	FBgn0032387	2726.17	-1.53144	2.13249104940182e-10	3.7185106675968e-09
CG10467	FBgn0035679	2264.62	-1.53578	4.25506856797221e-11	8.45170485631381e-10
Reg-2	FBgn0016715	544.345	-1.53969	6.39632663207353e-12	1.41774768296765e-10
CG33127	FBgn0053127	9322.98	-1.54072	1.84931710231671e-19	1.04319977741686e-17
Ace	FBgn0000024	526.35	-1.54342	6.51012995540901e-11	1.23648629893812e-09
fusl	FBgn0031702	89.3549	-1.54537	2.37616508902747e-05	0.000158814
CG18180	FBgn0036024	60795.9	-1.54706	9.23995035308707e-07	8.46832817900312e-06
CR40640	FBgn0085759	2666.6	-1.54786	5.73953220578182e-06	4.41400152321953e-05
CG8768	FBgn0033769	217.064	-1.54993	1.20965409380784e-13	3.32051520348907e-12
CG5961	FBgn0038056	504.32	-1.55323	6.57821460941487e-13	1.63830943098054e-11
CG7631	FBgn0028945	3484.84	-1.55445	9.37930068709387e-08	1.04356282398218e-06
CG5966	FBgn0029831	1301	-1.55722	1.08392197460461e-14	3.32304557540469e-13
CG2680	FBgn0024995	213.18	-1.55917	0.00139977	0.00579529
CG8774	FBgn0038136	9768.84	-1.56015	1.59310301798338e-09	2.4288362498498e-08
CG12643	FBgn0040942	740.825	-1.56173	2.49239822066208e-09	3.62828860974318e-08
CG3625	FBgn0031245	10176.8	-1.5629	4.20270960626065e-19	2.24715496577406e-17
CG42494	FBgn0260026	43.2212	-1.56315	1.36909306421607e-05	9.68408021974024e-05
lambdaTry	FBgn0043470	7528.25	-1.56433	1.55586311683492e-09	2.37527032261591e-08
CG10472	FBgn0035670	134965	-1.57611	3.41237542455673e-24	3.34768865563905e-22
CG6012	FBgn0032615	125.113	-1.57897	0.00213114	0.00833398
CG13616	FBgn0039200	6.6534	-1.58159	0.00241255	0.00928638
Usp1	FBgn0028476	2439.9	-1.58212	6.23063915933584e-09	8.56200621140402e-08
Jheh1	FBgn0010053	5200.62	-1.58426	3.83023360895442e-17	1.68799592094624e-15
CG7433	FBgn0036927	561.259	-1.58442	6.5355898885533e-10	1.07328275287712e-08
CG1208	FBgn0037386	1246.48	-1.58445	0.000220771	0.00115794
CG6867	FBgn0030887	336.606	-1.5858	0.000471538	0.00223901
CG1628	FBgn0030218	170.74	-1.58594	1.85750282395557e-07	1.94220082111833e-06
CG30456	FBgn0050456	3104.28	-1.58649	5.83313876604732e-10	9.64948263321788e-09
esn	FBgn0263934	14.4235	-1.58734	0.000773927	0.00344436
Ac13E	FBgn0022710	1495.83	-1.59151	7.17372621299237e-38	2.69779930449933e-35
CG6733	FBgn0039052	346.717	-1.59153	0.000501033	0.00236216
RpS29	FBgn0261599	26410.4	-1.59244	1.08207852888521e-14	3.32304557540469e-13
CG30339	FBgn0050339	1692.07	-1.60029	1.80051931853627e-13	4.84808089540005e-12
CG6574	FBgn0037846	611.661	-1.60284	1.34228649932973e-08	1.72873016957056e-07
Sodh-1	FBgn0024289	999.459	-1.61114	1.46957378939075e-05	0.000103429
Gclm	FBgn0046114	3719.09	-1.61357	1.86034397950621e-16	7.26242241411388e-15
CG1979	FBgn0026563	22.8481	-1.61415	0.000146484	0.000799533
CG17323	FBgn0032713	115.943	-1.62177	1.56459648252553e-07	1.66212594311234e-06
Syn1	FBgn0037130	170.311	-1.62232	6.84280066086916e-12	1.50488259368276e-10
CR14033	FBgn0046776	738.81	-1.62296	5.99303755073491e-08	6.88528000482599e-07
Doc1	FBgn0028789	21.0685	-1.62307	0.000767957	0.00342184
St3	FBgn0265052	1585.27	-1.62344	1.13633600724482e-10	2.0778189357757e-09
CG10924	FBgn0034356	783.06	-1.62827	2.40547758042409e-08	2.96272904610749e-07
CG34269	FBgn0085298	11.0006	-1.63167	0.000134926	0.000743642
ppk	FBgn0020258	9.4823	-1.6337	0.000401941	0.0019563
CG10116	FBgn0036367	4893.47	-1.63575	3.05427587679514e-29	5.06740300617689e-27
CG3739	FBgn0038702	2042.11	-1.64611	9.84989958043103e-12	2.13294754446109e-10
CG5835	FBgn0038682	3267.88	-1.64859	5.54295878619086e-18	2.6610919585449e-16
Dat	FBgn0019643	6339.26	-1.64875	3.41976491121341e-20	2.17976201854857e-18
CG11576	FBgn0039882	1578.97	-1.65146	1.64248155425962e-17	7.53271418502318e-16
CG6659	FBgn0030946	4186.18	-1.66312	1.37668276171035e-16	5.51309674038505e-15
CG15279	FBgn0028886	498.685	-1.6639	8.96793719026637e-09	1.19108089199603e-07
CG6901	FBgn0038414	1081.77	-1.66458	1.47043472006316e-10	2.62907203038868e-09
28SrRNA-Psi:CR45851	FBgn0267511	823.627	-1.66665	3.35893685834583e-08	4.06604352316069e-07
CR45009	FBgn0266361	22.8696	-1.67106	1.08711319765582e-05	7.89025205737976e-05
CG11898	FBgn0039645	1469.89	-1.67241	1.75394959850586e-17	8.01136006896484e-16
CG11149	FBgn0031732	1698.33	-1.67449	7.70985450149346e-27	9.35296542858594e-25
CR40621	FBgn0085757	17.9389	-1.67492	4.5685080107095e-05	0.000286503
CG9914	FBgn0030737	1337.34	-1.67496	4.30628828018567e-07	4.29183254214264e-06
CG8661	FBgn0030837	12217.9	-1.67589	0.000162569	0.000876724
LManV	FBgn0032068	49647.4	-1.67608	0.000111113	0.000627418
CG4459	FBgn0038753	141.781	-1.67649	1.92577966771697e-06	1.65978962652276e-05
CG42833	FBgn0262022	63.3882	-1.67649	0.00175915	0.00705787
NijA	FBgn0036101	85.8677	-1.67965	2.14469725297304e-08	2.65895323165295e-07
Ahcy89E	FBgn0015011	711.663	-1.67975	5.53021004878604e-11	1.06835324949322e-09
CG3699	FBgn0040349	2658.39	-1.67976	8.11847583483267e-07	7.54469887714845e-06
CG4630	FBgn0033809	440.377	-1.68327	3.71110171551392e-20	2.3390307013647e-18
CG5697	FBgn0038846	76.904	-1.68531	0.00132923	0.0055337
CG10226	FBgn0035695	266.884	-1.6857	6.78156778560151e-09	9.26266921999471e-08
Faa	FBgn0016013	21.5483	-1.68577	0.000129716	0.000718086
TrpA1	FBgn0035934	389.952	-1.68603	1.8262336367632e-14	5.46513737134283e-13
CG10300	FBgn0039107	1256.19	-1.68714	9.15023605652319e-11	1.6938375754246e-09
CG3734	FBgn0038700	8265.51	-1.68869	1.22692911757238e-26	1.45707518994227e-24
alpha-Est4aPsi	FBgn0027934	39.3873	-1.69152	0.00226591	0.00880605
CG17570	FBgn0260000	424.824	-1.69464	0.000111526	0.000629435
snRNA:7SK	FBgn0065099	109.942	-1.6958	1.56959081757599e-06	1.37806409368811e-05
CG1806	FBgn0030360	86.454	-1.6997	3.13584157313066e-09	4.44454329498243e-08
CG7322	FBgn0030968	809.541	-1.70558	7.40533258573915e-19	3.83242946019766e-17
CG34026	FBgn0054026	2751.67	-1.7104	1.62412402589475e-09	2.46613287485122e-08
CG10738	FBgn0036368	92.205	-1.71116	7.15746849431909e-05	0.000426349
CG42249	FBgn0259101	13623.8	-1.71141	8.31529352420282e-30	1.4890974847628e-27
CG30486	FBgn0050486	8.10111	-1.71231	0.00190751	0.00757764
Seipin	FBgn0040336	2368.19	-1.71337	6.26946372666557e-27	7.85912108491566e-25
Cyp4ac2	FBgn0031694	41.324	-1.72045	5.01624254936929e-05	0.000310018
CG30151	FBgn0050151	34.3478	-1.72175	8.97605179920319e-07	8.27351441165118e-06
beat-IIa	FBgn0038498	14.8866	-1.72553	0.00103913	0.00445084
CG32669	FBgn0052669	2300.48	-1.72855	3.95675300967834e-15	1.32857403140449e-13
CG2120	FBgn0030005	366.405	-1.73556	6.52998541417639e-12	1.44170832568959e-10
CG30495	FBgn0050495	758.488	-1.7359	5.04619129117152e-14	1.45232474864788e-12
CG17633	FBgn0032144	70138.6	-1.7388	3.054388052454e-24	3.04952265555628e-22
CG4653	FBgn0030776	12454.8	-1.7395	4.78429565245012e-10	7.9611244175431e-09
Sugb	FBgn0036191	830.601	-1.73976	3.17640798333066e-29	5.11946212399093e-27
CG34301	FBgn0085330	932.535	-1.74119	1.50091130861806e-09	2.30071757932459e-08
HDAC6	FBgn0026428	1960.15	-1.74133	1.61684330244542e-24	1.65829328528992e-22
rec	FBgn0003227	50.7065	-1.74265	1.96388609899922e-12	4.65474011951873e-11
KCNQ	FBgn0033494	2085.83	-1.74642	4.33915563408987e-16	1.62684199684256e-14
CG13202	FBgn0033623	54.6792	-1.74644	9.51556396463009e-06	7.01205699862552e-05
Gs2	FBgn0001145	7760.15	-1.74813	1.05056987369855e-09	1.66147634992968e-08
28SrRNA-Psi:CR40596	FBgn0085753	207.139	-1.75067	1.46239433126571e-07	1.56981283019408e-06
CG13449	FBgn0036520	12.6613	-1.75226	3.40600963852606e-05	0.000219832
CR41544	FBgn0085799	5.59968	-1.75351	0.00167125	0.00675818
CG4465	FBgn0038750	26.681	-1.75476	5.81378945038072e-06	4.46806352719314e-05
CG8773	FBgn0038135	38927.6	-1.75636	1.03474834327577e-10	1.89821639168085e-09
Sid	FBgn0039593	67.8701	-1.75993	8.64755618685532e-08	9.69798498012939e-07
CG11470	FBgn0039671	22.3654	-1.76152	0.000223322	0.00117023
LysC	FBgn0004426	246.149	-1.76171	0.000620383	0.00282876
CG7860	FBgn0030653	67.3555	-1.7667	1.47489138156901e-05	0.000103739
CG13325	FBgn0033792	595.629	-1.76832	6.11486724537938e-05	0.000371102
CG1532	FBgn0031143	6443.74	-1.77261	6.16676969963541e-07	5.90606924883588e-06
CG15221	FBgn0030331	51.424	-1.77579	1.66928412837839e-05	0.000115681
CG9498	FBgn0031801	2153.4	-1.77846	1.22298500292615e-09	1.91104110845052e-08
CG15771	FBgn0029801	1746.86	-1.77898	1.2266434095179e-27	1.66734830676879e-25
28SrRNA-Psi:CR41609	FBgn0085819	38.8495	-1.78131	1.87076503109003e-05	0.000127683
CG3940	FBgn0037788	1475.27	-1.78365	1.35254245961382e-08	1.73995256891255e-07
ATP8B	FBgn0037989	431.8	-1.78561	1.8130078038765e-06	1.56858543277107e-05
Oatp58Da	FBgn0050277	458.484	-1.78802	3.39485189807912e-05	0.000219237
nemy	FBgn0261673	226.975	-1.78826	0.000545261	0.00253676
CG14219	FBgn0031033	545.835	-1.79024	7.10034359407283e-05	0.00042317
CG42489	FBgn0259992	170.967	-1.79419	7.78088598028397e-33	1.82883240894925e-30
CG10170	FBgn0039085	3407.12	-1.79437	3.08011846601237e-42	1.38999586134206e-39
CR41590	FBgn0085807	68.0138	-1.79913	4.63697161114351e-06	3.66346734712333e-05
CG30334	FBgn0050334	9.01517	-1.7992	0.000279722	0.00142539
Fancl	FBgn0037781	792.961	-1.80079	2.78590324301907e-24	2.80630003461975e-22
Cyp12a4	FBgn0038681	6778.46	-1.80178	4.34184537252524e-19	2.31059903268065e-17
18SrRNA-Psi:CR41602	FBgn0085813	185.663	-1.80278	1.70916589060569e-07	1.79709315729854e-06
Dcp-1	FBgn0010501	944.743	-1.80492	4.27210870473509e-26	4.96885880482693e-24
28SrRNA-Psi:CR40741	FBgn0085771	44.1057	-1.80638	4.34706360696916e-07	4.31721581107624e-06
CG8501	FBgn0033724	11.4069	-1.80854	0.000182747	0.000973443
CS-2	FBgn0029091	5928.08	-1.81041	3.70488050714105e-21	2.61240386759783e-19
CG32633	FBgn0052633	10720.2	-1.81079	2.4439894283664e-16	9.44283860644854e-15
Pebp1	FBgn0038973	55863.2	-1.81431	5.89449101434353e-08	6.77896509926847e-07
CG7470	FBgn0037146	7980.18	-1.81598	4.37102523129159e-21	3.0629755689088e-19
CG17271	FBgn0038829	1949.28	-1.81628	4.47136271618161e-21	3.11394531876302e-19
CG34456	FBgn0085485	50.4424	-1.82676	8.70868922040377e-15	2.73680868480767e-13
CG4822	FBgn0031220	92.8586	-1.82922	3.16629548397872e-05	0.000206129
Npc2f	FBgn0039154	2562.31	-1.82985	6.7787038703005e-06	5.14998902792796e-05
GstE7	FBgn0063493	2785.23	-1.83034	5.17203366039132e-29	8.10428941062984e-27
CG15096	FBgn0034394	6610.31	-1.8341	3.54295351583706e-08	4.27047025274292e-07
CNMa	FBgn0035282	10.4727	-1.83488	0.00145005	0.00596627
CG6048	FBgn0029827	2499.64	-1.83628	1.50903731668306e-16	6.01588657484747e-15
CG14615	FBgn0031184	645.513	-1.84042	1.17142088822219e-10	2.12940286549571e-09
CG43349	FBgn0263081	6039.3	-1.84067	1.24998358647712e-16	5.03654100808389e-15
CG33258	FBgn0053258	2064.95	-1.84277	1.19897292767346e-11	2.55321694212164e-10
CR42195	FBgn0085828	16.2051	-1.84615	9.09771466936866e-06	6.73493549211399e-05
CG18404	FBgn0039761	12774.8	-1.84903	3.00733514105427e-09	4.28393371987049e-08
Rel	FBgn0014018	5510.31	-1.85665	1.23714523173537e-05	8.87879930307787e-05
CR45281	FBgn0266819	70.7031	-1.85713	3.698533217834e-13	9.57037884486311e-12
CG17109	FBgn0039051	2552.97	-1.86184	5.81167786228961e-17	2.49305511948104e-15
CR40639	FBgn0085758	52.7721	-1.86533	1.88970714890818e-08	2.3688528948869e-07
qin	FBgn0263974	16.7087	-1.86611	6.71677144640687e-05	0.000403078
CG8646	FBgn0033763	6.09727	-1.87224	0.000923544	0.00401365
CG34330	FBgn0085359	19467.6	-1.87434	1.70924471480099e-23	1.55513700583748e-21
CG31343	FBgn0051343	74320.3	-1.88389	1.14133780887823e-14	3.4895862221583e-13
Prx2540-2	FBgn0033518	682.831	-1.88782	9.9936972226704e-12	2.15994046103769e-10
Jon25Bii	FBgn0031654	63128.5	-1.89213	1.55625910523356e-06	1.36848910563095e-05
CG3961	FBgn0036821	621.116	-1.89468	1.10931297848636e-10	2.03169951676674e-09
Cyp313b1	FBgn0037601	99.5051	-1.90209	3.05045187025695e-09	4.33987364441852e-08
CG1946	FBgn0033216	2269.52	-1.90491	3.00991906152015e-07	3.07311374226881e-06
CG3348	FBgn0040609	2259.83	-1.90625	3.9704185437875e-12	9.01292998209468e-11
CG9629	FBgn0036857	484.432	-1.90704	2.05509515714744e-12	4.85054049433837e-11
NLaz	FBgn0053126	1060.76	-1.91661	1.84783411753702e-25	2.02400626350026e-23
Alp4	FBgn0016123	1247.52	-1.92102	9.48586731221413e-06	6.99931687484629e-05
CG42784	FBgn0263354	26.5215	-1.92157	2.56108837729586e-09	3.70913980393477e-08
CG8399	FBgn0034067	591.92	-1.92935	1.48987139553512e-10	2.65960903234608e-09
CG13741	FBgn0033374	9.4688	-1.92968	0.000425418	0.0020511
CG15784	FBgn0029766	11648.1	-1.9302	1.33780658387979e-23	1.23714212125671e-21
CG12194	FBgn0031636	1595.81	-1.93114	8.66815290227629e-11	1.6164314222063e-09
CG43400	FBgn0263314	36.851	-1.93156	7.07101988387129e-05	0.000422091
CG3841	FBgn0032131	5174.98	-1.93293	9.85584915892274e-07	8.9817197262493e-06
Toll-9	FBgn0036978	324.935	-1.93527	6.35465542521919e-10	1.04509070710383e-08
LysB	FBgn0004425	1250.05	-1.93686	0.00201315	0.00793584
CG10051	FBgn0034437	737.866	-1.93726	2.46139564018154e-06	2.06464428345934e-05
MFS12	FBgn0033234	780.273	-1.93883	2.00989986961129e-18	9.90204817858277e-17
CG13318	FBgn0037627	21.6215	-1.94018	1.03369449026085e-07	1.14446920894238e-06
ome	FBgn0259175	7800.02	-1.94153	2.80203409673984e-21	2.03951926963992e-19
CG11162	FBgn0030509	1153.84	-1.94215	0.000962123	0.00416494
CG18788	FBgn0042126	96.5648	-1.94342	1.98858634473828e-09	2.95979302656164e-08
CG30411	FBgn0050411	587.035	-1.94441	2.76686875449376e-16	1.06176235674145e-14
CG5144	FBgn0035957	36.74	-1.94947	1.59837837024922e-08	2.03761635854821e-07
PH4alphaSG2	FBgn0039779	16.4433	-1.95247	0.000250869	0.0012995
CG10827	FBgn0038845	9430.85	-1.95425	8.10369102168475e-20	4.86307670780039e-18
Cyp4e2	FBgn0014469	1755.31	-1.95428	7.47600191363194e-07	7.01232157797641e-06
CG14456	FBgn0037176	9.79117	-1.95945	0.00153666	0.00627454
CG7227	FBgn0031970	117.404	-1.96287	3.0865281929989e-07	3.14563785667693e-06
CG11825	FBgn0033519	45.5402	-1.96335	3.37044711329093e-10	5.70951716698923e-09
Thor	FBgn0261560	3478.34	-1.96662	3.35492571759389e-22	2.74277332941263e-20
Jon65Aii	FBgn0035666	13668.1	-1.97121	5.40421575183127e-07	5.26514353300176e-06
CG2993	FBgn0037521	8.92284	-1.98302	0.000112929	0.000635762
tilB	FBgn0014395	114.4	-1.98392	2.31174718657975e-09	3.39156459804848e-08
Dh31-R	FBgn0052843	550.127	-1.98857	4.42385422362183e-10	7.40503313811595e-09
CG13078	FBgn0032809	110.597	-1.99052	1.10310013623672e-05	7.99304800065682e-05
Eo	FBgn0030597	59.3694	-1.99329	0.000123628	0.000687756
CG5973	FBgn0031914	868.153	-1.99387	1.08882618187754e-06	9.86677669392966e-06
AANATL2	FBgn0031791	310.116	-1.99496	8.3474091750044e-12	1.81805927244015e-10
CG30196	FBgn0050196	16.9815	-1.99559	3.90294958574746e-06	3.13179781126621e-05
CG5254	FBgn0040383	2050.73	-1.99588	1.51701527420811e-09	2.32224780510393e-08
CG31041	FBgn0051041	5229.15	-1.99677	7.91304677122763e-27	9.49733975244576e-25
CG14856	FBgn0038261	35.5856	-1.99953	1.70653903898158e-06	1.48443896976023e-05
28SrRNA-Psi:CR45848	FBgn0267508	16.5206	-2.00256	3.47161430384021e-06	2.81775198387951e-05
CG32483	FBgn0052483	2949.28	-2.00901	5.97972836764439e-24	5.66918449107261e-22
CG43348	FBgn0263080	362.508	-2.01045	2.64810532144413e-08	3.23682819464059e-07
CG8312	FBgn0037720	803.329	-2.0141	3.06569309245693e-09	4.35606416487394e-08
dmGlut	FBgn0010497	14230.2	-2.01792	3.03440411729975e-12	6.97233141575882e-11
CG33296	FBgn0053296	16.856	-2.01832	0.000291444	0.00147513
Cyp9f3Psi	FBgn0038034	915.803	-2.02114	2.84721310756889e-19	1.54080054426025e-17
CG15818	FBgn0031910	3016.68	-2.02309	6.87388773364189e-14	1.9387800352737e-12
hec	FBgn0030437	8.87272	-2.0243	0.000278623	0.00142172
Peritrophin-15b	FBgn0040958	296.212	-2.02719	9.58019042851115e-06	7.05507235081349e-05
CG4741	FBgn0035040	1202.18	-2.0287	5.37303524046832e-22	4.23906178901843e-20
lectin-28C	FBgn0040099	225.182	-2.03103	1.55699109298043e-22	1.30118322303742e-20
CG5955	FBgn0036997	4.71704	-2.0331	0.000990493	0.0042647
caix	FBgn0039486	475.316	-2.03373	5.27634789424355e-53	4.96064641190464e-50
CR43493	FBgn0263504	134.772	-2.03776	3.91358153852465e-28	5.58899074906774e-26
CG34370	FBgn0085399	10.5207	-2.04819	5.35462657241384e-06	4.15766668891762e-05
CG9864	FBgn0034490	6825.71	-2.05229	1.05399867671651e-06	9.57424562859551e-06
CG15385	FBgn0031397	269.34	-2.05668	4.0191321741172e-23	3.54248821784299e-21
Mal-A7	FBgn0033296	10639	-2.06303	0.00263183	0.00998396
Gld	FBgn0001112	31.2179	-2.06346	1.03007046486068e-05	7.52184788644546e-05
CG13085	FBgn0032780	167.764	-2.06787	1.91209130258761e-18	9.46149740166376e-17
Cyp4d1	FBgn0005670	5319.47	-2.06828	0.000659384	0.00298642
CG13361	FBgn0029532	3.69014	-2.07064	0.00138532	0.0057397
GC	FBgn0035245	6.38812	-2.07138	0.000389072	0.00190599
CG8468	FBgn0033913	2028.6	-2.07655	1.76896937041134e-15	6.10321481253235e-14
CR43432	FBgn0263380	9.83044	-2.08129	1.32402060067842e-05	9.41247663317832e-05
sug	FBgn0033782	2118.18	-2.08341	5.68762837907916e-16	2.09698769192062e-14
Jon25Bi	FBgn0020906	105682	-2.09414	2.88120264361242e-06	2.38486634080963e-05
CR45133	FBgn0266626	276.611	-2.09587	1.56966237293086e-14	4.73500825973421e-13
CG3690	FBgn0040350	377.949	-2.09594	0.00168887	0.00681956
Jon65Aiv	FBgn0250815	395322	-2.09862	7.90242894297663e-15	2.51141417844119e-13
LManII	FBgn0027611	44034.5	-2.10282	1.1608451970822e-16	4.7110271631228e-15
CG31106	FBgn0051106	187.098	-2.10419	6.1320712951271e-05	0.000371946
Fmo-1	FBgn0034943	31.8777	-2.10587	8.64685259786541e-06	6.43482883383378e-05
Pde9	FBgn0259171	281.485	-2.10839	5.50479396927903e-13	1.38627423128138e-11
Cyp6a18	FBgn0039519	205.426	-2.11113	5.53245991414577e-05	0.00033904
CG5111	FBgn0039343	7.64264	-2.11233	0.000546106	0.00253859
CR45635	FBgn0267195	11.7026	-2.11491	0.00025512	0.00131815
Cyp6t1	FBgn0031182	1201.47	-2.11536	4.13769010394388e-16	1.56125149674565e-14
lectin-33A	FBgn0040096	18.6586	-2.11626	1.02980845869583e-05	7.52184788644546e-05
scpr-C	FBgn0037879	6.34126	-2.11735	0.00108693	0.00463443
rdgC	FBgn0265959	2.86791	-2.11867	0.00254494	0.00969346
CG31373	FBgn0051373	323.132	-2.12845	7.33797095800081e-09	9.91884280093854e-08
Obp8a	FBgn0030103	7.87078	-2.13006	0.00144419	0.00594647
axo	FBgn0262870	2472.74	-2.13303	1.8232535470283e-20	1.18901424957071e-18
CG9672	FBgn0030777	6812.35	-2.13321	3.9884868848835e-25	4.24510462596751e-23
slo	FBgn0003429	483.173	-2.13672	9.85371260499204e-06	7.23760322978647e-05
CG32024	FBgn0052024	79.0752	-2.13739	0.000102239	0.000583144
CG16723	FBgn0039092	178.697	-2.13816	1.78341794560551e-10	3.15368671823219e-09
FucTC	FBgn0044872	431.877	-2.14317	6.70352465338097e-16	2.44754579739301e-14
alphaTry	FBgn0003863	232528	-2.1432	5.54501940664267e-20	3.38156264571582e-18
Jon99Fii	FBgn0039777	79809.1	-2.14566	1.42361606106822e-10	2.55752171989995e-09
Octbeta2R	FBgn0038063	17.7805	-2.15951	4.27975009707153e-07	4.27671750178573e-06
PGRP-SC2	FBgn0043575	14842.2	-2.16028	2.67500480460201e-14	7.81849849883933e-13
CG9717	FBgn0039789	117.271	-2.16216	9.80370149871418e-05	0.000561734
GstE3	FBgn0063497	4513.2	-2.17565	2.37776902872397e-47	1.34129950910319e-44
List	FBgn0034381	49.6062	-2.17766	2.39572952161685e-09	3.51021044972484e-08
CG1090	FBgn0037238	9.90845	-2.17928	9.09447570302872e-06	6.73493549211399e-05
CG13255	FBgn0040636	1027.44	-2.18079	3.72427855001247e-15	1.26178109913636e-13
l(2)34Fc	FBgn0261534	3.01221	-2.18227	0.00200423	0.00791171
CG17119	FBgn0039045	2894.72	-2.19454	3.32129474761485e-24	3.28691643356059e-22
CG13912	FBgn0035186	449.342	-2.19852	1.14990715437131e-14	3.50628446368031e-13
CG17192	FBgn0039472	54208.1	-2.20344	0.00225461	0.00876515
PGRP-SC1b	FBgn0033327	1366.94	-2.20436	1.18069399155837e-09	1.85523532211164e-08
CG2003	FBgn0039886	299.076	-2.20544	4.93874370033277e-12	1.1077317381144e-10
CR44690	FBgn0265901	553.655	-2.20565	5.33122481789103e-17	2.3044780994424e-15
CG18585	FBgn0031929	6067.72	-2.20914	1.2153840045652e-29	2.04656154320965e-27
CG12512	FBgn0031703	282.775	-2.20944	2.27756402766507e-17	1.02781909440469e-15
CG13708	FBgn0035577	18.5796	-2.21041	0.000225944	0.00118288
ppk6	FBgn0034489	16.134	-2.21104	4.52653196229044e-06	3.59130334729682e-05
CG14857	FBgn0038262	113.274	-2.21705	6.31060208952242e-21	4.26324627389173e-19
CG7402	FBgn0036768	219.097	-2.23119	1.40928906173615e-12	3.3973502552366e-11
CG31267	FBgn0051267	2035.32	-2.23898	2.97239383630381e-16	1.1357330862301e-14
CG14606	FBgn0037485	285.952	-2.24391	9.81490248811401e-08	1.08987923101282e-06
Jon25Biii	FBgn0031653	126391	-2.24646	2.29544851057558e-08	2.83650055819427e-07
CG31286	FBgn0051286	15.7561	-2.24734	5.1263919696779e-07	5.01612785792767e-06
SP1029	FBgn0263236	53.5136	-2.25471	7.55495819550623e-14	2.12556205390776e-12
CG13032	FBgn0036652	2.6037	-2.26454	0.00178653	0.00716261
CR44587	FBgn0265798	49.6524	-2.26627	9.57787595837964e-10	1.52193797975266e-08
CG14693	FBgn0037837	10.9684	-2.27044	6.14850965630368e-05	0.000372743
CG31091	FBgn0051091	4913.63	-2.27172	0.000396224	0.00193515
bbx	FBgn0024251	13.3047	-2.27553	7.58924612058692e-08	8.57934616557732e-07
CG8952	FBgn0030688	9965.6	-2.27932	1.35874393594586e-22	1.15258263799558e-20
stl	FBgn0086408	678.535	-2.28067	3.3700416105395e-10	5.70951716698923e-09
CG1315	FBgn0026565	4280.27	-2.28176	8.63792134464997e-16	3.1234945067417e-14
Nep1	FBgn0029843	992.818	-2.28344	5.23214559411028e-13	1.32352167248323e-11
CG6462	FBgn0035663	205.123	-2.2888	8.72519498894071e-16	3.13495700207736e-14
DIP-iota	FBgn0031837	5.09462	-2.29584	0.000258534	0.00133369
CG8177	FBgn0036043	4515.49	-2.30089	8.95040939600187e-19	4.56916374686394e-17
Adh	FBgn0000055	9.2493	-2.30143	1.85877092393606e-05	0.000127172
plh	FBgn0037292	2.61953	-2.30681	0.00125406	0.00526352
mwh	FBgn0264272	919.206	-2.30986	0.000282677	0.0014385
CG3270	FBgn0033093	506.764	-2.31527	8.00090696759767e-11	1.50193398350145e-09
MFS9	FBgn0038799	261.578	-2.31742	8.94553409333323e-33	2.05966358450991e-30
CG5160	FBgn0031906	133.674	-2.31766	5.29237426716485e-10	8.78067154149321e-09
Obp49a	FBgn0050052	4.80934	-2.31848	0.000591077	0.00271409
CR45943	FBgn0267605	82.6164	-2.32251	1.41846151130651e-24	1.4817669232e-22
CG6295	FBgn0039471	64046.8	-2.32433	8.21020558503467e-05	0.000479935
Drep2	FBgn0028408	43.2485	-2.32791	5.50118838716261e-11	1.06639875230187e-09
CG13075	FBgn0036563	109.414	-2.3416	2.4249326023097e-12	5.67595220316556e-11
CR44046	FBgn0264838	6.38958	-2.34234	8.8865677798833e-05	0.000515732
CG17167	FBgn0039941	3012.02	-2.34346	3.59185646211289e-20	2.27659126997515e-18
CG42633	FBgn0261356	4.49557	-2.34413	0.000223766	0.00117202
CG30025	FBgn0050025	7.28114	-2.34605	0.000341007	0.00169258
ClC-a	FBgn0051116	1067.62	-2.34636	1.07945812740094e-21	8.28465754648801e-20
shd	FBgn0003388	96.6332	-2.3474	4.02115102539851e-06	3.2197747245242e-05
CG32204	FBgn0052204	11.3448	-2.34925	3.33084125565265e-06	2.72111158915809e-05
t	FBgn0086367	216.543	-2.35848	2.00151370933596e-27	2.65659737279157e-25
Mipp1	FBgn0026061	6532.44	-2.36068	3.62545465764151e-11	7.2780034604113e-10
CG18744	FBgn0042101	1181.41	-2.36339	6.81579387711641e-10	1.11281890769359e-08
CG32834	FBgn0052834	37.5275	-2.37604	0.00189395	0.00753174
CG10654	FBgn0036294	21.771	-2.37705	6.96742352401697e-09	9.50501477605313e-08
Peritrophin-15a	FBgn0040959	3958.65	-2.3788	3.76747820529831e-13	9.70426692058801e-12
CG8026	FBgn0033391	2.79083	-2.3797	0.000826663	0.00364598
Mdr50	FBgn0010241	4339.1	-2.38078	4.96514835457681e-05	0.000307447
Cyp4d8	FBgn0015033	562.166	-2.38347	9.36656872244491e-07	8.56350310588521e-06
Kal1	FBgn0039155	15.8063	-2.38371	2.61610339104469e-08	3.20465564145127e-07
CG5150	FBgn0035620	11120.7	-2.38407	4.44877928395188e-08	5.25011797924112e-07
CG10592	FBgn0035619	12040.7	-2.38446	9.16124397118272e-10	1.45984681472999e-08
Cpr49Ae	FBgn0033728	23.3979	-2.39158	0.000121327	0.000676962
CG10804	FBgn0029663	21.6616	-2.39372	3.25035094621336e-06	2.66500431505662e-05
CG15209	FBgn0030237	2275.72	-2.39679	1.38719267199442e-33	3.63960644777698e-31
CR45142	FBgn0266635	363.248	-2.39934	1.43689506264471e-10	2.57727346530329e-09
CG15695	FBgn0038832	625.322	-2.39954	1.07129498656271e-13	2.9623406956864e-12
CG12115	FBgn0030097	15.1345	-2.40311	9.12912933660319e-07	8.38037731290132e-06
CG30043	FBgn0050043	1281.56	-2.40498	3.97529697470676e-08	4.74566781342175e-07
CG32750	FBgn0052750	765.647	-2.41313	2.66689608502901e-11	5.44085382121108e-10
CG11912	FBgn0031248	3317.52	-2.41412	4.84854512048549e-07	4.77323612995788e-06
CG11570	FBgn0036230	12.0699	-2.41445	2.2187527303632e-05	0.000149177
CG13315	FBgn0040827	11941.5	-2.41653	4.76954582699884e-13	1.21742117692762e-11
CG13160	FBgn0033720	209.032	-2.42307	6.2053040588998e-16	2.28039870985367e-14
Ser6	FBgn0011834	3349.64	-2.42497	1.15085752999864e-16	4.69634584647388e-15
CG31463	FBgn0051463	2775.78	-2.43362	2.91539587864809e-12	6.72627736255783e-11
CG30076	FBgn0050076	14.2385	-2.43374	1.20469723811898e-07	1.31572064283236e-06
Or67b	FBgn0036019	4.62669	-2.43702	0.000298967	0.00150915
CG15414	FBgn0031542	28.0559	-2.43732	2.19188548594578e-14	6.47352147969642e-13
Ugt86De	FBgn0040255	5.43912	-2.45213	0.000210201	0.00110864
RluA-1	FBgn0051719	940.153	-2.46974	7.43951966642865e-13	1.83660089445619e-11
CG14880	FBgn0038422	2.34905	-2.4738	0.000842114	0.00370543
alpha-Est7	FBgn0015575	1793.45	-2.47612	3.25049624001551e-09	4.5955010751698e-08
Tsp42Eg	FBgn0033128	960.112	-2.47999	1.3794891914047e-20	9.10140178796948e-19
CG11659	FBgn0038731	8.72077	-2.48333	1.18076082502815e-05	8.51204065684832e-05
CG3868	FBgn0036422	39600.9	-2.48457	1.87794167836223e-21	1.40310847783329e-19
CG43920	FBgn0264541	19.3236	-2.48531	4.11168202919987e-05	0.000260022
Jon99Fi	FBgn0039778	55044.9	-2.48734	5.54182409696221e-14	1.58285720156779e-12
CG7084	FBgn0038938	1020.18	-2.48905	2.65888631853359e-12	6.19784203423471e-11
CG14715	FBgn0037930	393.777	-2.49258	5.01565052321287e-31	1.01047445005156e-28
CG31636	FBgn0051636	771.922	-2.49582	1.1453263849406e-16	4.69634584647388e-15
CG8129	FBgn0037684	329.274	-2.49648	6.04849673456278e-20	3.66877097630846e-18
Slc45-1	FBgn0035968	82.1193	-2.49828	1.59118086605685e-11	3.34296136514962e-10
CR43310	FBgn0263002	7.75179	-2.5011	0.000649764	0.00294758
smp-30	FBgn0038257	5567.93	-2.5073	1.58583737260419e-05	0.000110441
CG31265	FBgn0051265	1751.2	-2.50873	2.32758467779599e-19	1.28724560465168e-17
28SrRNA-Psi:CR45855	FBgn0267515	1.7802	-2.51306	0.000987525	0.00425401
danr	FBgn0039283	9.40733	-2.5138	5.2123960447299e-06	4.05840249666272e-05
CG5157	FBgn0036575	320.061	-2.51852	1.61694001360688e-08	2.05431500377396e-07
Zip42C.1	FBgn0033096	120.05	-2.53246	1.46888522183258e-08	1.88104007635813e-07
CG31663	FBgn0051663	361.355	-2.53427	4.3158841013497e-07	4.29759968503331e-06
CG9593	FBgn0038365	12.4957	-2.53798	5.56063230156275e-08	6.4277718879335e-07
CG16749	FBgn0037678	13999.3	-2.53817	4.24808478677377e-18	2.05694817872883e-16
CG1774	FBgn0039856	952.036	-2.53819	9.27897069025108e-30	1.63570855199082e-27
CG18493	FBgn0038701	13552	-2.54412	6.94813636357088e-32	1.42525226279649e-29
CG2082	FBgn0027608	70.2904	-2.54855	1.8106161505994e-16	7.09283729550779e-15
CG18417	FBgn0035780	316.558	-2.54937	1.06489969979331e-16	4.41698471068679e-15
Jon99Ci	FBgn0003358	59324.2	-2.55393	5.40034492700206e-11	1.04974548353088e-09
CG14820	FBgn0035718	5411.95	-2.55508	4.73197739578259e-33	1.16056889085259e-30
CG18327	FBgn0033904	245.409	-2.56214	8.78378614676485e-11	1.63259761627349e-09
Bace	FBgn0032049	190812	-2.56341	1.98163697137038e-09	2.95725242209003e-08
Cyp4ac1	FBgn0031693	1133.08	-2.57876	1.39545247075739e-11	2.94270930375419e-10
frac	FBgn0035798	15.8559	-2.57966	0.000112075	0.0006319
CG14007	FBgn0031731	1.94288	-2.58066	0.00070775	0.00318248
Tmhs	FBgn0262624	39.1602	-2.58229	1.90987723183216e-08	2.3914800143763e-07
Cyp4ad1	FBgn0033292	2692	-2.58639	1.24635219463895e-11	2.64311004885652e-10
Proc	FBgn0045038	1.76975	-2.58796	0.000671645	0.003031
tut	FBgn0052364	61.515	-2.58932	1.44442557797501e-17	6.67869236504676e-16
CG31792	FBgn0051792	56.095	-2.59296	5.93291452686515e-17	2.53542203379139e-15
Eaat1	FBgn0026439	2445.95	-2.59986	2.90974525031136e-11	5.90427084784403e-10
Skeletor	FBgn0262717	8.24311	-2.60574	9.73332970989585e-06	7.1585023329234e-05
CG11407	FBgn0038733	68.0962	-2.61866	1.02788553685832e-16	4.29503875067983e-15
CG7966	FBgn0038115	753.097	-2.62144	4.84388302011944e-17	2.10187262434568e-15
CG15170	FBgn0032733	1282.11	-2.62926	3.1983795320311e-17	1.41771388488637e-15
CG1809	FBgn0033423	8552.44	-2.63034	2.25628966496076e-23	2.00436692914074e-21
Cyp311a1	FBgn0030367	706.497	-2.63589	1.74192092481462e-12	4.15483126295106e-11
Sgs5	FBgn0003375	2.56389	-2.63928	0.000540303	0.0025168
CG4991	FBgn0030817	512.697	-2.63996	9.96468822847602e-09	1.3133365957204e-07
iotaTry	FBgn0015001	5490.69	-2.64813	9.67218541580783e-31	1.84951857391769e-28
CG7881	FBgn0033048	700.153	-2.64948	2.26621360934371e-37	8.24755546471476e-35
CG15169	FBgn0032734	54.0025	-2.65695	3.58422277914576e-11	7.22092882041473e-10
CG14688	FBgn0037819	436.163	-2.66611	2.65691296155776e-19	1.46220936742901e-17
GstE5	FBgn0063495	753.381	-2.67043	4.13751370011341e-32	8.80743954050556e-30
CG5538	FBgn0038052	2.09842	-2.67581	0.000431364	0.00207533
CG17475	FBgn0038481	5495.48	-2.68122	7.38029516378611e-15	2.39912769523619e-13
CG30289	FBgn0050289	7.99355	-2.68191	1.89219322500936e-06	1.63366734834386e-05
CG33012	FBgn0053012	219.357	-2.68457	1.16294369193735e-12	2.83376473702746e-11
CG30016	FBgn0050016	63.8099	-2.68572	1.70845328628263e-06	1.48495916608941e-05
PGRP-SC1a	FBgn0043576	1806.13	-2.68855	1.66471323195476e-09	2.52436756490775e-08
Cyp4e3	FBgn0015035	46.0438	-2.69005	5.53344428520587e-07	5.37248867690986e-06
vis	FBgn0033748	4.308	-2.69092	6.43414630634963e-05	0.000388182
alpha-Est1	FBgn0015568	1486.88	-2.69268	4.03133860824443e-17	1.76285124721758e-15
Ugt37b1	FBgn0026755	531.072	-2.70283	0.000113332	0.000637076
CG15021	FBgn0035544	18.5364	-2.70355	4.42541391540684e-06	3.52346646391108e-05
CG6293	FBgn0037807	121.384	-2.70513	4.3765898002193e-12	9.89512748017518e-11
CG31019	FBgn0051019	4.81406	-2.70891	8.29355091754618e-05	0.000484556
CG32195	FBgn0052195	304.231	-2.70982	4.01683881650649e-22	3.23699825198759e-20
CG13728	FBgn0036716	3.53324	-2.71576	0.000373308	0.00183755
CG32751	FBgn0052751	161.249	-2.71727	1.18498047693717e-14	3.60349049617388e-13
CG3635	FBgn0032981	478.132	-2.7188	1.2216434149547e-13	3.34528665231042e-12
ninaD	FBgn0002939	6443.31	-2.72973	0.000183297	0.000975912
CG15544	FBgn0039804	46.0404	-2.73061	8.6208145679771e-10	1.38349971487792e-08
CG5361	FBgn0037786	191.108	-2.74279	3.20437015286318e-17	1.41771388488637e-15
CG43773	FBgn0264295	257.258	-2.74322	2.7319055733127e-18	1.34005907296147e-16
thetaTry	FBgn0011555	39881.8	-2.7514	8.10282242222619e-40	3.15227732991572e-37
CG31269	FBgn0051269	984.695	-2.7525	4.96564144965765e-12	1.11155489752059e-10
CR45867	FBgn0267527	2.10262	-2.75348	0.000277835	0.00141834
Jon74E	FBgn0023197	38309.4	-2.76115	5.39556601995129e-12	1.20540150172456e-10
Btnd	FBgn0029848	248.917	-2.76699	2.8217806650141e-13	7.36928922747433e-12
CG17477	FBgn0038479	214.636	-2.76938	3.79015886427006e-11	7.58166175650617e-10
CG12374	FBgn0033774	797133	-2.7729	4.0870143687885e-09	5.72080596881785e-08
CG13894	FBgn0035157	3.89097	-2.77573	7.85478749824954e-05	0.000462032
Diedel3	FBgn0085358	17023.3	-2.77754	2.63092329931356e-10	4.50410875005396e-09
CG14642	FBgn0037222	30.3733	-2.77802	1.31941629125336e-10	2.38552157017955e-09
CG31266	FBgn0051266	2360.64	-2.7812	4.03414413350706e-13	1.03439122986879e-11
CG9413	FBgn0030574	1915.27	-2.78777	1.70318402336166e-55	1.92153221515663e-52
CG7025	FBgn0031930	4077.53	-2.79627	8.71454917236068e-16	3.13495700207736e-14
CG14323	FBgn0038529	6.35972	-2.8168	2.80959851784621e-05	0.000185043
CG31013	FBgn0051013	4.53913	-2.83998	6.75139310921455e-05	0.00040451
CG14247	FBgn0039454	31.1186	-2.84043	1.83337957865663e-07	1.91875588185567e-06
alpha-Est4	FBgn0015572	376.046	-2.8704	2.96785981603771e-27	3.89341795866715e-25
CG6296	FBgn0039470	2049.87	-2.89352	8.10309598974998e-10	1.30972964120859e-08
CG18607	FBgn0034429	78.3295	-2.8937	4.62908953784318e-09	6.43169804999344e-08
CG44438	FBgn0265631	2.57558	-2.903	0.000119695	0.000668844
CG30047	FBgn0050047	1637.18	-2.91415	4.50922612917558e-21	3.12104841652509e-19
sut3	FBgn0028561	2.40959	-2.91539	0.000107846	0.000611722
CG34375	FBgn0085404	18.6784	-2.93476	6.48210932813473e-08	7.3797173043632e-07
CR45194	FBgn0266704	10.5775	-2.93899	8.73830439498952e-08	9.78031251828093e-07
CG17571	FBgn0259998	31507.6	-2.9536	2.45616042435865e-13	6.44427951339866e-12
CG14829	FBgn0035751	5.99958	-2.96338	2.17843683337783e-06	1.85487730974858e-05
CG12934	FBgn0033541	313.51	-2.96471	2.02572655677692e-11	4.19343981900133e-10
CR45955	FBgn0267617	6.52052	-2.96826	3.37960651065883e-06	2.75695738635235e-05
CG5550	FBgn0034160	6932.3	-2.99788	4.74343905658503e-10	7.90479755338143e-09
CG13077	FBgn0032810	156.22	-3.00726	1.81415950629693e-12	4.31800581224514e-11
GstE4	FBgn0063496	4.39042	-3.01751	8.93229681433658e-06	6.62552088490107e-05
pncr009:3L	FBgn0062928	554.129	-3.01867	3.8356099450212e-29	6.09483822531397e-27
CG6403	FBgn0039453	428.044	-3.02143	4.45513640448269e-09	6.19763858389318e-08
CG3104	FBgn0031473	36.6028	-3.02472	6.0798777552672e-18	2.90649071334426e-16
epsilonTry	FBgn0010425	70604.7	-3.02911	1.60976995690707e-14	4.84304657435347e-13
CG2772	FBgn0031533	2761.63	-3.05152	9.15831342854997e-11	1.6938375754246e-09
eIF4E-3	FBgn0265089	2.58102	-3.06588	4.01005428145573e-05	0.000254023
CG15534	FBgn0039769	2719.24	-3.06591	3.25591041283717e-07	3.30280519261245e-06
CG5107	FBgn0039342	50527.9	-3.06742	1.69236627136691e-15	5.85683321274893e-14
CG10163	FBgn0035697	64.2533	-3.0713	2.06823173903851e-23	1.8667032383866e-21
mag	FBgn0036996	19610.5	-3.07596	2.67314845137164e-12	6.21823934605666e-11
Jon44E	FBgn0001285	7731.49	-3.08068	6.56203187435043e-18	3.11444696200716e-16
CG7408	FBgn0036765	681.261	-3.08899	3.34957082079684e-27	4.29430204548068e-25
CG31741	FBgn0051741	30.4688	-3.09092	4.88614852845936e-06	3.83615363243414e-05
CG9394	FBgn0034588	5458.97	-3.1107	2.4740716107976e-12	5.7789805202937e-11
MtnA	FBgn0002868	28188	-3.12402	1.7374282284349e-20	1.13963170193038e-18
CR45192	FBgn0266702	537.562	-3.1365	2.48019607588607e-11	5.06912538553381e-10
CG8664	FBgn0030836	437.563	-3.16814	2.78245715881446e-06	2.30821188718711e-05
CG13284	FBgn0032614	1931.57	-3.20162	2.44157070638207e-32	5.4011373940005e-30
Jon66Ci	FBgn0035886	9891.28	-3.21146	1.20384703916246e-12	2.92711256375664e-11
CG12057	FBgn0030098	88920.7	-3.21758	7.09957755178185e-24	6.61962263960354e-22
CG10725	FBgn0036362	291.289	-3.22655	1.47799715338619e-09	2.26867535843578e-08
Cyp12d1-p	FBgn0050489	79.2993	-3.23739	5.42326506930268e-10	8.98462210159659e-09
CR44230	FBgn0265161	5.18221	-3.24119	1.23630915034976e-06	1.10786654759698e-05
CG11911	FBgn0031249	43678	-3.24323	2.08519945265114e-19	1.15887784358671e-17
kek1	FBgn0015399	72.873	-3.26758	6.35382272685164e-13	1.58944186262395e-11
CG8299	FBgn0034052	2669.71	-3.27683	2.02985002417558e-12	4.80099957499977e-11
dan	FBgn0039286	6.47412	-3.27871	2.37739608250086e-06	2.00611687380514e-05
CG33965	FBgn0053965	573.666	-3.289	4.61773631851342e-19	2.44588268288584e-17
CG33282	FBgn0053282	52.5445	-3.2971	3.52043456172166e-14	1.02101652250241e-12
CG8800	FBgn0033408	4.91097	-3.3126	3.12954902059975e-06	2.57719504017565e-05
CR44238	FBgn0265169	9.31812	-3.31946	3.9640889780814e-08	4.73759023842313e-07
daw	FBgn0031461	221.321	-3.32364	8.00138471726231e-19	4.12199188950472e-17
CR41509	FBgn0085792	3.38769	-3.32422	6.74911576610299e-06	5.13096523404137e-05
Jon65Ai	FBgn0035667	30995.2	-3.33715	1.91891458676835e-20	1.24420657286899e-18
CG12519	FBgn0036872	3.55957	-3.34564	5.90776081000201e-06	4.52794547951377e-05
CG8745	FBgn0036381	2400.68	-3.34859	5.52368743724893e-12	1.23158580369649e-10
CG8560	FBgn0035781	15571	-3.35954	5.95842265089624e-28	8.40286554342643e-26
SkpB	FBgn0026176	5.9727	-3.36148	5.39525938660379e-07	5.26096079513085e-06
CG17636	FBgn0025837	252.38	-3.36844	8.40715390920945e-14	2.3535858660968e-12
CG5348	FBgn0034156	4.34614	-3.39717	4.58414353338379e-06	3.63190360559241e-05
Jon66Cii	FBgn0035887	1004.27	-3.41661	1.64565783984908e-16	6.51449535058852e-15
CG11700	FBgn0029856	166.306	-3.45755	3.34896105259323e-55	3.43481623594153e-52
CG9825	FBgn0034783	5426.51	-3.46479	1.34814648611032e-15	4.7530589550927e-14
5-HT7	FBgn0004573	34.0487	-3.47232	9.13846166083296e-15	2.85595912624702e-13
rpr	FBgn0011706	10.9768	-3.51784	2.85253319148686e-09	4.0788693873707e-08
Ugt86Dg	FBgn0040253	212.008	-3.51972	7.05375944935652e-33	1.69320242782213e-30
zetaTry	FBgn0011556	4851.05	-3.52136	1.52879276189101e-19	8.75524870033216e-18
CG32444	FBgn0043783	1957.99	-3.53638	9.39892302763864e-19	4.77651574764951e-17
CG15254	FBgn0028949	289.507	-3.56807	6.19800456362951e-17	2.62879276266422e-15
CG14694	FBgn0037845	680.718	-3.5929	3.25606043590526e-46	1.74927970656586e-43
yip7	FBgn0040060	245570	-3.59484	7.94835802031997e-63	1.793467503705e-59
CG12490	FBgn0034782	302.398	-3.59634	1.95082918707399e-17	8.83905818818021e-16
CG7542	FBgn0036738	18862.5	-3.5999	2.75760971280211e-19	1.50296390240741e-17
Obp83b	FBgn0010403	5.59245	-3.65095	8.54573199166642e-08	9.60288329979886e-07
CG4053	FBgn0038482	938.2	-3.67804	9.91096606845989e-20	5.88502732549287e-18
Cyp4d14	FBgn0023541	1138.66	-3.6789	6.87145920975467e-30	1.25038391620084e-27
CG5255	FBgn0038485	9.91676	-3.68704	2.25786204055824e-10	3.91293387735453e-09
mthl9	FBgn0035131	164.812	-3.70343	8.27245526757253e-35	2.33324600821883e-32
CG8562	FBgn0035779	16471.1	-3.73828	6.85484408325818e-32	1.42525226279649e-29
PH4alphaPV	FBgn0051015	403.549	-3.7504	2.95363260649073e-34	7.93401977772104e-32
CG5246	FBgn0038484	1693.71	-3.78431	9.90649552029465e-30	1.71946280707637e-27
Jon99Ciii	FBgn0003357	76777.7	-3.79509	1.11598187643403e-21	8.50709968238426e-20
CG8539	FBgn0035791	439.933	-3.81472	4.34599279787653e-35	1.32517542555792e-32
CG6283	FBgn0039474	2754.99	-3.9203	7.15827923010716e-26	8.24078635449683e-24
CG14500	FBgn0034318	3568.18	-3.95175	2.11687969449306e-35	6.6340657536863e-33
Jon99Cii	FBgn0003356	80706.6	-3.96607	1.94727185990743e-25	2.11241549264189e-23
Sdic2	FBgn0053497	5.46106	-3.97785	1.98053610224736e-08	2.47172658247287e-07
CG9509	FBgn0030594	5481.14	-4.06054	8.31846762020465e-23	7.10976906751127e-21
CG14205	FBgn0031034	3510.19	-4.06303	1.83173164960082e-19	1.03847218446213e-17
CG17352	FBgn0035880	399.376	-4.16181	2.58042135093943e-50	1.81951960508117e-47
CG18131	FBgn0031343	21.3897	-4.20253	2.04359220096606e-19	1.14137659461877e-17
CG5282	FBgn0036986	7.0932	-4.32725	3.96243743158185e-10	6.6922483687285e-09
CG31089	FBgn0051089	508.835	-4.32826	4.49475881635348e-11	8.84988987191972e-10
Zip42C.2	FBgn0033097	1182.8	-4.33597	4.16039410073762e-100	2.34687831222609e-96
CG16854	FBgn0032338	18.7462	-4.35113	9.59771861885773e-16	3.43750671295089e-14
CG32379	FBgn0052379	588.104	-4.43475	1.45055954332128e-18	7.24124458750032e-17
CG3819	FBgn0036833	5705.16	-4.5308	5.01204875236668e-24	4.83298581403426e-22
CG15253	FBgn0028948	520.132	-4.53875	1.254828496448e-27	1.68535417820551e-25
CG17191	FBgn0039473	30.1129	-4.96516	7.15000898109465e-21	4.80157150742321e-19
deltaTry	FBgn0010358	1340.41	-5.00204	1.95998391864342e-51	1.57946704072393e-48
CG13813	FBgn0036956	78.0478	-5.15302	1.25891439314458e-35	4.0580206238449e-33
Cyp6a2	FBgn0000473	374.604	-5.20644	5.88544780246713e-62	1.10666036845724e-58
Npc2d	FBgn0037782	4185.44	-5.34609	9.33958386299306e-45	4.39038271426199e-42
Tektin-C	FBgn0035638	55.0186	-5.36626	2.25376973982352e-34	6.20171468407047e-32
CG5892	FBgn0038873	69.8699	-5.74364	2.09121144469763e-24	2.12549977649357e-22
CG11289	FBgn0031887	44.4451	-5.82761	4.52371502909044e-27	5.73444415260656e-25
Gyc-89Da	FBgn0038435	24.3098	-5.91401	2.18546304765492e-21	1.62213119102913e-19
CG4302	FBgn0027073	1470.95	-5.92368	8.67177000399175e-100	3.26116363950116e-96
CR45714	FBgn0267278	67.9432	-5.95647	1.0293722664877e-35	3.41569938544535e-33
CG1304	FBgn0031141	2071.62	-6.03331	1.18394270841104e-127	1.33572416362933e-123
Sdic3	FBgn0052823	34.8655	-6.04986	2.1574551900163e-25	2.3181342336918e-23
CG11893	FBgn0039316	600.205	-6.38629	7.250309447059e-23	6.29215316782458e-21
Dscam4	FBgn0263219	143.184	-6.60367	3.08629970139274e-61	4.97423331873042e-58
CR32207	FBgn0052207	140.823	-7.60202	1.64460407015896e-49	1.03080128441852e-46
