# Supplementary material for: A Non-stop identity complex (NIC) supervises enterocyte identity and protects from premature aging
Source: eLife journal article supplement (doi:10.7554/elife.62312), 2021-02-25
Supplement: supp [file elife-62312-supp-v1.zip › elife_poa_e62312_Supplementary_file_1.xlsx]

## Sheet: Sheet1
Reagent type (species)	Designation	Source or reference	Identifiers	Additional information
or resource
Genetic reagent (D. melanogaster)	w; MyoIA-Gal4; tub-Gal80ts, UAS-GFP	Edgar Bruce lab
Genetic reagent (D. melanogaster)	w; esg-Gal4, tub-Gal80ts UAS-GFP	Edgar Bruce lab
Genetic reagent (D. melanogaster)	w; Prospero-Gal4	Edgar Bruce lab
Genetic reagent (D. melanogaster)	w; Dl-Gal4/TM6, Tb	Edgar Bruce lab
Genetic reagent (D. melanogaster)	Su(H)-Gal4	Sarah Bray lab
Genetic reagent (D. melanogaster)	Notch-reporter 3.37-gh-LacZ	Sarah Bray lab
Genetic reagent (D. melanogaster)	M5-4::LacZ	Erika Matunis
Genetic reagent (D. melanogaster)	UAS-LamC	Lori Walworth
Genetic reagent (D. melanogaster)	UAS-Non-stop RNAi	Bloomington	28725
Genetic reagent (D. melanogaster)	UAS-Non-stop RNAi	VDRC	45775/GD ; 45776/GD
Genetic reagent (D. melanogaster)	UAS-GFP	Bloomington	# 1521
Genetic reagent (D. melanogaster)	UAS-GCN5-RNAi	Bloomington	# 33981
Genetic reagent (D. melanogaster)	UAS-SGF11-RNAi	VDRC	17166/GD;100581/KK
Genetic reagent (D. melanogaster)	UAS-Su(Hw)-RNAi	Bloomington	# 33906
Genetic reagent (D. melanogaster)	UAS-LacZ	Bloomington	#1776
Genetic reagent (D. melanogaster)	UAS-Atx7-RNA-i	VDRC	102078/KK
Genetic reagent (D. melanogaster)	UAS-e(y)2 RNAi	VDRC	16751/GD ; 108212/KK
Genetic reagent (D. melanogaster)	UAS-e(y)2 RNAi	Bloomington	42524
Genetic reagent (D. melanogaster)	UAS-CP-190 RNAi	Bloomington	42536
Genetic reagent (D. melanogaster)	UAS-Nup98-96 RNAi	Bloomington	#28562
Genetic reagent (D. melanogaster)	UAS-mod(mdg4) RNAi	Bloomington	# 32995
Genetic reagent (D. melanogaster)	“G-TRACE” (w*; P{UAS-RedStinger}6, P{UAS-FLP.Exel}3, P{Ubi-p63E(FRT.STOP)Stinger}15F2.)	Bloomington	#28281
Genetic reagent (Yeast)	pJ69-4A (MATa trp1-901 leu2-3,112 ura3-52 his3-200 gal4Δ gal80Δ GAL2-ADE2 LYS2::GAL1-HIS3 met2::GAL7-lacZ)
Antibody	anti-Prospero (Mouse monoclonal (IgG1))	DHSB	Prospero (MR1A)	(1:100)
Antibody	anti-Armadillo (Mouse monoclonal)	DHSB	N2 7A1 Armadillo	(1:500)
Antibody	anti-Delta (Mouse monoclonal(IgG1))	DHSB	C594.9B	(1:50)
Antibody	anti 4F3 anti-discs large (Dlg) (Mouse monoclonal)	DHSB	4F3 anti-discs	(1:50)
Antibody	anti-HP1(Rabbit polyclonal)	Susan Purkhurst lab		(1:1000)
Antibody	anti-mTor (Mouse monoclonal(IgG1))	DHSB	12F10-5F11	(1:100)
Antibody	anti-βGal(Rabbit polyclonal)	MP Biomedicals	55976	(1:500)
Antibody	anti-Actin (Mouse monoclonal)	MP Biomedicals	691001	(WB) (1:4000)
Antibody	anti-MESH(Rabbit polyclonal)	Mikio Furuse lab		(1:100)
Antibody	anti-SSK (Rabbit polyclonal)	Mikio Furuse lab		(1:100)
Antibody	anti-caudal (Guinea Pig Polyclonal)	Jeff Reinitz lab		(1:200)
Antibody	anti-odd-skipped (Guinea Pig Polyclonal) (Rat Polyclonal)	Jeff Reinitz lab		(1:100)
Antibody	anti Lamin C (Mouse monoclonal)	Yossef Gruenbaum lab		(1:500)
Antibody	anti Otefin (Mouse monoclonal)	Yossef Gruenbaum lab		(1:10)
Antibody	anti-Lamin Dm0(Rabbit polyclonal)	Yossef Gruenbaum lab		(1:300)
Antibody	anti-p-histone H3 (Rabbit polyclonal)	Abcam	ab5176	(1:100)
Antibody	anti-Nop60B (Rabbit polyclonal)	Steven Pole lab		(1:100)
Antibody	Guinee pig anti-Coilin	Joseph Gall lab		(1:2000)
Antibody	anti-Non-stop(Rabbit polyclonal)	Cloud et al. 2019		(1:100)
Antibody	anti-PCNA (Rabbit polyclonal)	Bruce Edgar Lab		(1:100)
Antibody	anti-Nup98 (Rabbit polyclonal)	Cordula Schlutz Lab		(1:100)
Antibody	anti-e(y)2 (Rabbit polyclonal)	Cloud et al 2019		(1:1000 - WB, 1:100 - IHC)
Antibody	anti-Cp190 (Rabbit polyclonal)	Glovonin et al. 2007		(1:1000WB), (1:100 IHC)
Antibody	anti-mod (MDG4) (Mouse monoclonal)	Glovonin et al. 2007		( 1:100 IHC)
Antibody	anti-H1 (Rabbit polyclonal)	Bas Van-Steensel lab		(1:500) (1:1000WB)
Antibody	anti-H2Bub (Mouse monoclonal)	Moshe Oren Lab		(1:500)
Antibody	anti-H2B (Mouse monoclonal)	Moshe Oren Lab		(1:500)
Antibody	anti-Pdm1 (Rabbit polyclonal)	Di´az-Benjumea lab		(1:50)
Antibody	Alexa Fluor® 568 goat anti-mouse IgG1(γ1	invitrogen	A21124	(1:1000)
Antibody	Alexa Fluor® 568 goat anti-mouse IgG (H+L)	invitrogen	A11031	(1:1000)
Antibody	Alexa Fluor® 568 goat anti-rabbit IgG (H+L)	invitrogen	A11036	(1:1000)
Antibody	Alexa Fluor® 633 goat anti-rabbit IgG (H+L)	invitrogen	A-21070	(1:1000)
Antibody	Alexa Fluor® 633 goat anti-mouse IgG1 (γ1)	invitrogen	A-21126	(1:1000)
Antibody	Alexa Fluor® 568 goat anti-guinea pig	invitrogen	A11075	(1:1000)
Antibody	Alexa Fluor® 633 goat anti-guinea pig	invitrogen	A21105	(1:1000)
Antibody	Alexa Fluor® 633 goat anti-rat	invitrogen	A21094	(1:1000)
Antibody	Alexa Fluor® 568 goat anti-rat	invitrogen	A11077	(1:1000)
sequence-based reagent	CP190 CT (aa, 468-1096)	pET32a(+) vector (merck)		5’-tttggtaccgggccctggctgtgcctg-3’
Sequence-based reagent	CP190 CT (aa, 468-1096)	pET32a(+) vector (merck)		5’-tttctcgagtgcggccgcagatcttag-3’
Sequence-based reagent	CP190 NT (aa, 1-524)	pET32a(+) vector (merck)		5’- tttcatatgggtgaagtcaagtccgtg -3’
Sequence-based reagent	CP190 NT (aa, 1-524)	pET32a(+) vector (merck)		5’- tttctcgagcatgtggaaatgcagttcccg -3’
Sequence-based reagent	e(y)2	pET32a(+) vector (merck)		5’- tttggatccccggaattcccgacgatgag-3’
Sequence-based reagent	e(y)2	pET32a(+) vector (merck)		5’- tttgcggccgcttaggattcgtcctctggc-3’
Sequence-based reagent	Non-Stop (aa 496)	pGBT9 vector (Clontech)		5’-ttgaattcatgtccgagacgggttgtc-3’
Sequence-based reagent	Non-Stop (aa 496)	pGBT9 vector (Clontech)		5’-ttgtcgacttactcgtattccagcacatt-3’
Sequence-based reagent	CP190 (aa 1096)	pGAD424 vector (Clontech)		5’-ttcccgggcatgggtgaagtcaagtccg-3’
Sequence-based reagent	CP190 (aa 1096)	pGAD424 vector (Clontech)		5’-tttggaggagctatatttactaagatct-3’
Sequence-based reagent	CP190 from first to fourth zinc fingers	pGAD424 vector (Clontech)		5’-ttgaattcgagaatactactgggccct-3’
Sequence-based reagent	CP190 from first to fourth zinc fingers	pGAD424 vector (Clontech)		5’-ttgtcgacgccatcctccaaagcctg-3’
Sequence-based reagent	CP190 from second to third	pGAD424 vector (Clontech)		5’-ttgaattcgcgctttgtgagcattgc-3’
Sequence-based reagent	CP190 from second to third	pGAD424 vector (Clontech)		5’-ttgtcgacgttgtcgtccgtgtgcac-3’
Sequence-based reagent	CP190Δ4	pGAD424 vector (Clontech)		5’-aaggtaccggagcaggctttgga-3’
Sequence-based reagent	CP190Δ4	pGAD424 vector (Clontech)		5’-aaggtacccactgctgcttgttgtcg-3’
Sequence-based reagent	CP190Δ3-4	pGAD424 vector (Clontech)		5’-aaggtaccggagcaggctttgga
Sequence-based reagent	CP190Δ3-4	pGAD424 vector (Clontech)		5’-aaggtaccaacgtatacagcagcgac-3’
Sequence-based reagent	CP190Δ2-4	pGAD424 vector (Clontech)		5’-aaggtaccggagcaggctttgga
Sequence-based reagent	CP190Δ2-4	pGAD424 vector (Clontech)		5’-aaggtacccgcgccggatcaattg-3’
Sequence-based reagent	CP190Δ1-4	pGAD424 vector (Clontech)		5’-gccctggctgaaggagcaggctttggagga
Sequence-based reagent	CP190Δ1-4	pGAD424 vector (Clontech)		5’-cctgctccttcagccagggcccagtagtat-3’
Cell line (D. melanogaster)	S2
recombinant DNA reagent	pY3H
recombinant DNA reagent	pRmha3 C-HAx2-FLx2-nonstop-735	Cloud et al. 2019
Transfected construct (Drosophila S2 Cells)	Non-Stop-RNAi forward			5’-cggaattccgaattaatacgactcactatagggatttaatctggaaccatgcgaa-3’
Transfected construct (Drosophila S2 Cells)	Non-Stop-RNAi reverse			5’-cggaattccgaattaatacgactcactatagggaaatgtcccaaaacggatcgta-3’
Chemical compound, Drug	Diamidino-2-phenylindole*dihydrochl [DAPI] 1mg	Sigma	D9542-1MG	1:1000
Chemical compound, Drug	Bromophenol Blue	Sigma	#B5525
Chemical compound, Drug	Guanidine hydrochloride	Sigma	#G4505
Chemical compound, Drug	NP40 (Igepal CA-630)	Sigma	#I3021
Chemical compound, Drug	Triton X-100	Amresco	#0694
Chemical compound, Drug	Acrylamide (Bis-Acrylamide 29:1)	Biological Industries	#01-874-1A
Chemical compound, Drug	Ammonium Persulfate	Sigma	#A-9164
Chemical compound, Drug	TEMED	Sigma	#T-7024
Chemical compound, Drug	L-Glutamine	Gibco	#25030024
Chemical compound, Drug	MG132	Boston Biochemicals
Chemical compound, Drug	Blot Qualified BSA	Biological Industries	#PRW3841
Chemical compound, Drug	Agarose	SeaKem® LE Agarose- Cambrex Bio Science	#CAM-50004
Chemical compound, Drug	Bradford Protein Assay	BioRad	#500-0006
Chemical compound, Drug	EZ-ECL	Biological Industries	#20-500-500
Chemical compound, Drug	FD&C blue dye #1
Chemical compound, Drug	Cyclohexamide	Sigma	#01810
