# Supplementary figures and images for: A Non-stop identity complex (NIC) supervises enterocyte identity and protects from premature aging
Source: eLife journal article supplement (doi:10.7554/elife.62312), 2021-02-25

Figure 1 Fig. Supp. 1: Erez *et al.*

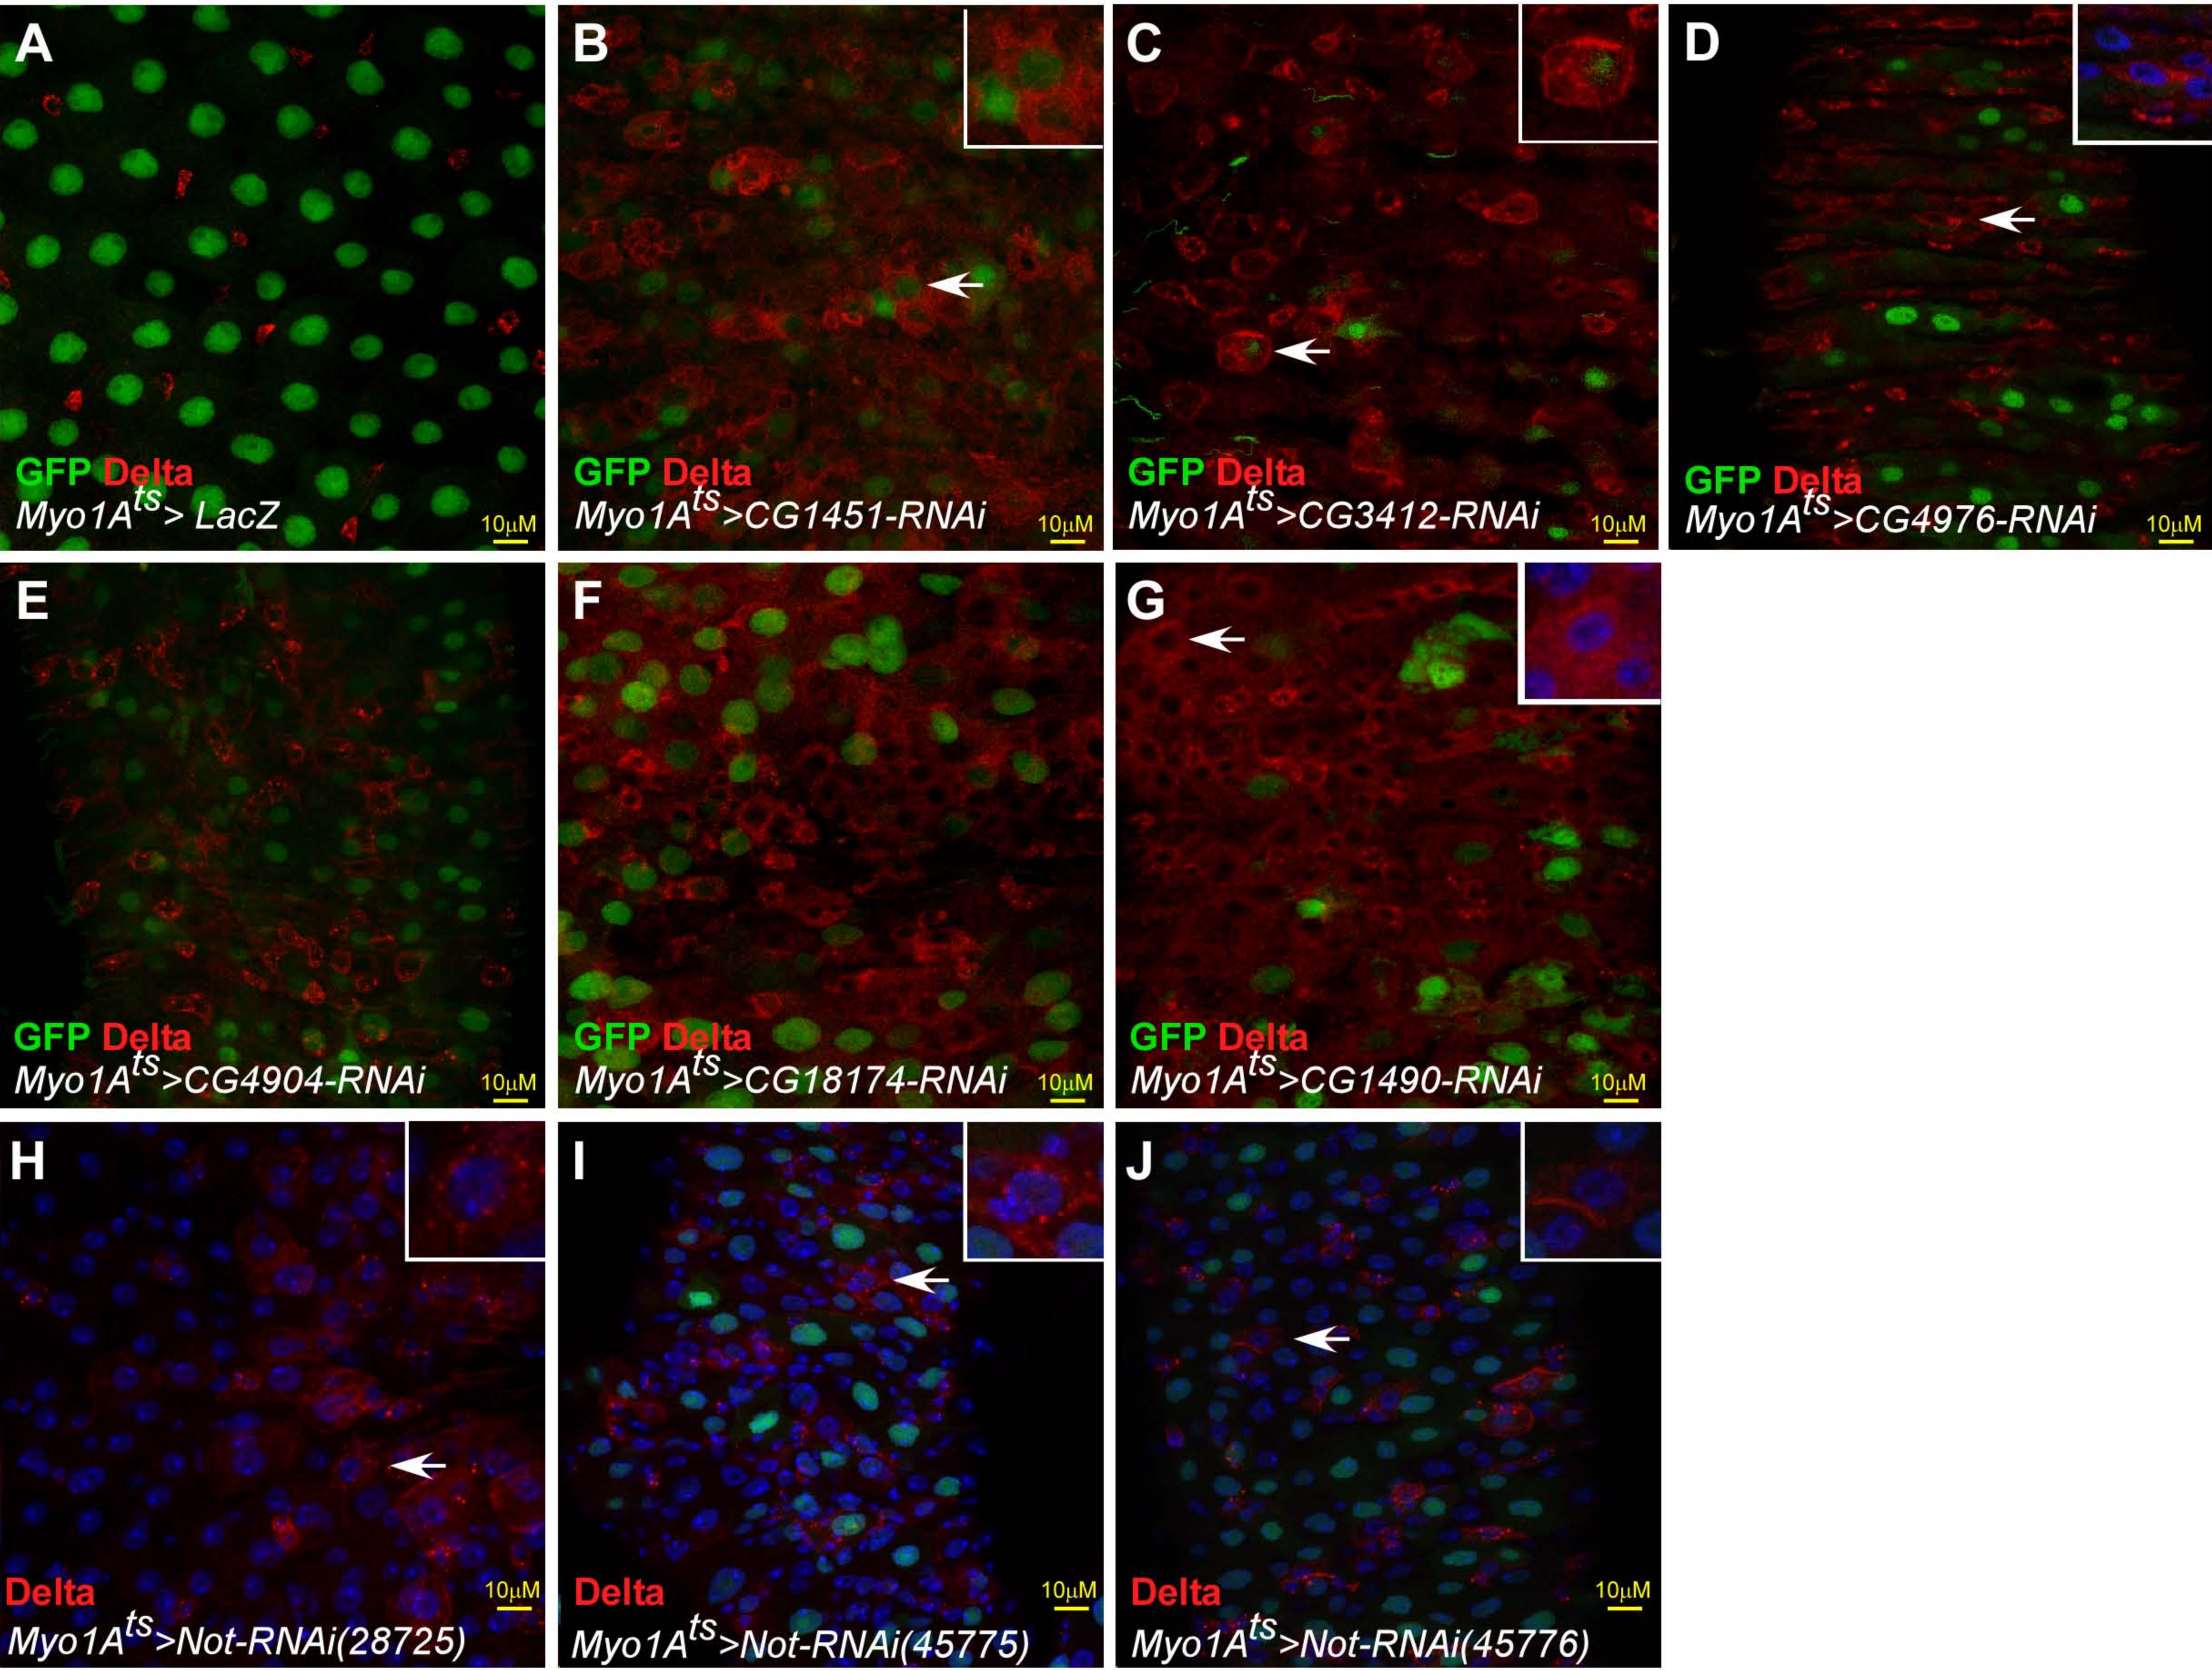

Supplement: supp [file elife-62312-supp-v1.zip › elife_poa_e62312_Figure_1_figure_supplement_1.pdf]

Figure 1 Fig. Supp. 2: Erez *et al.*

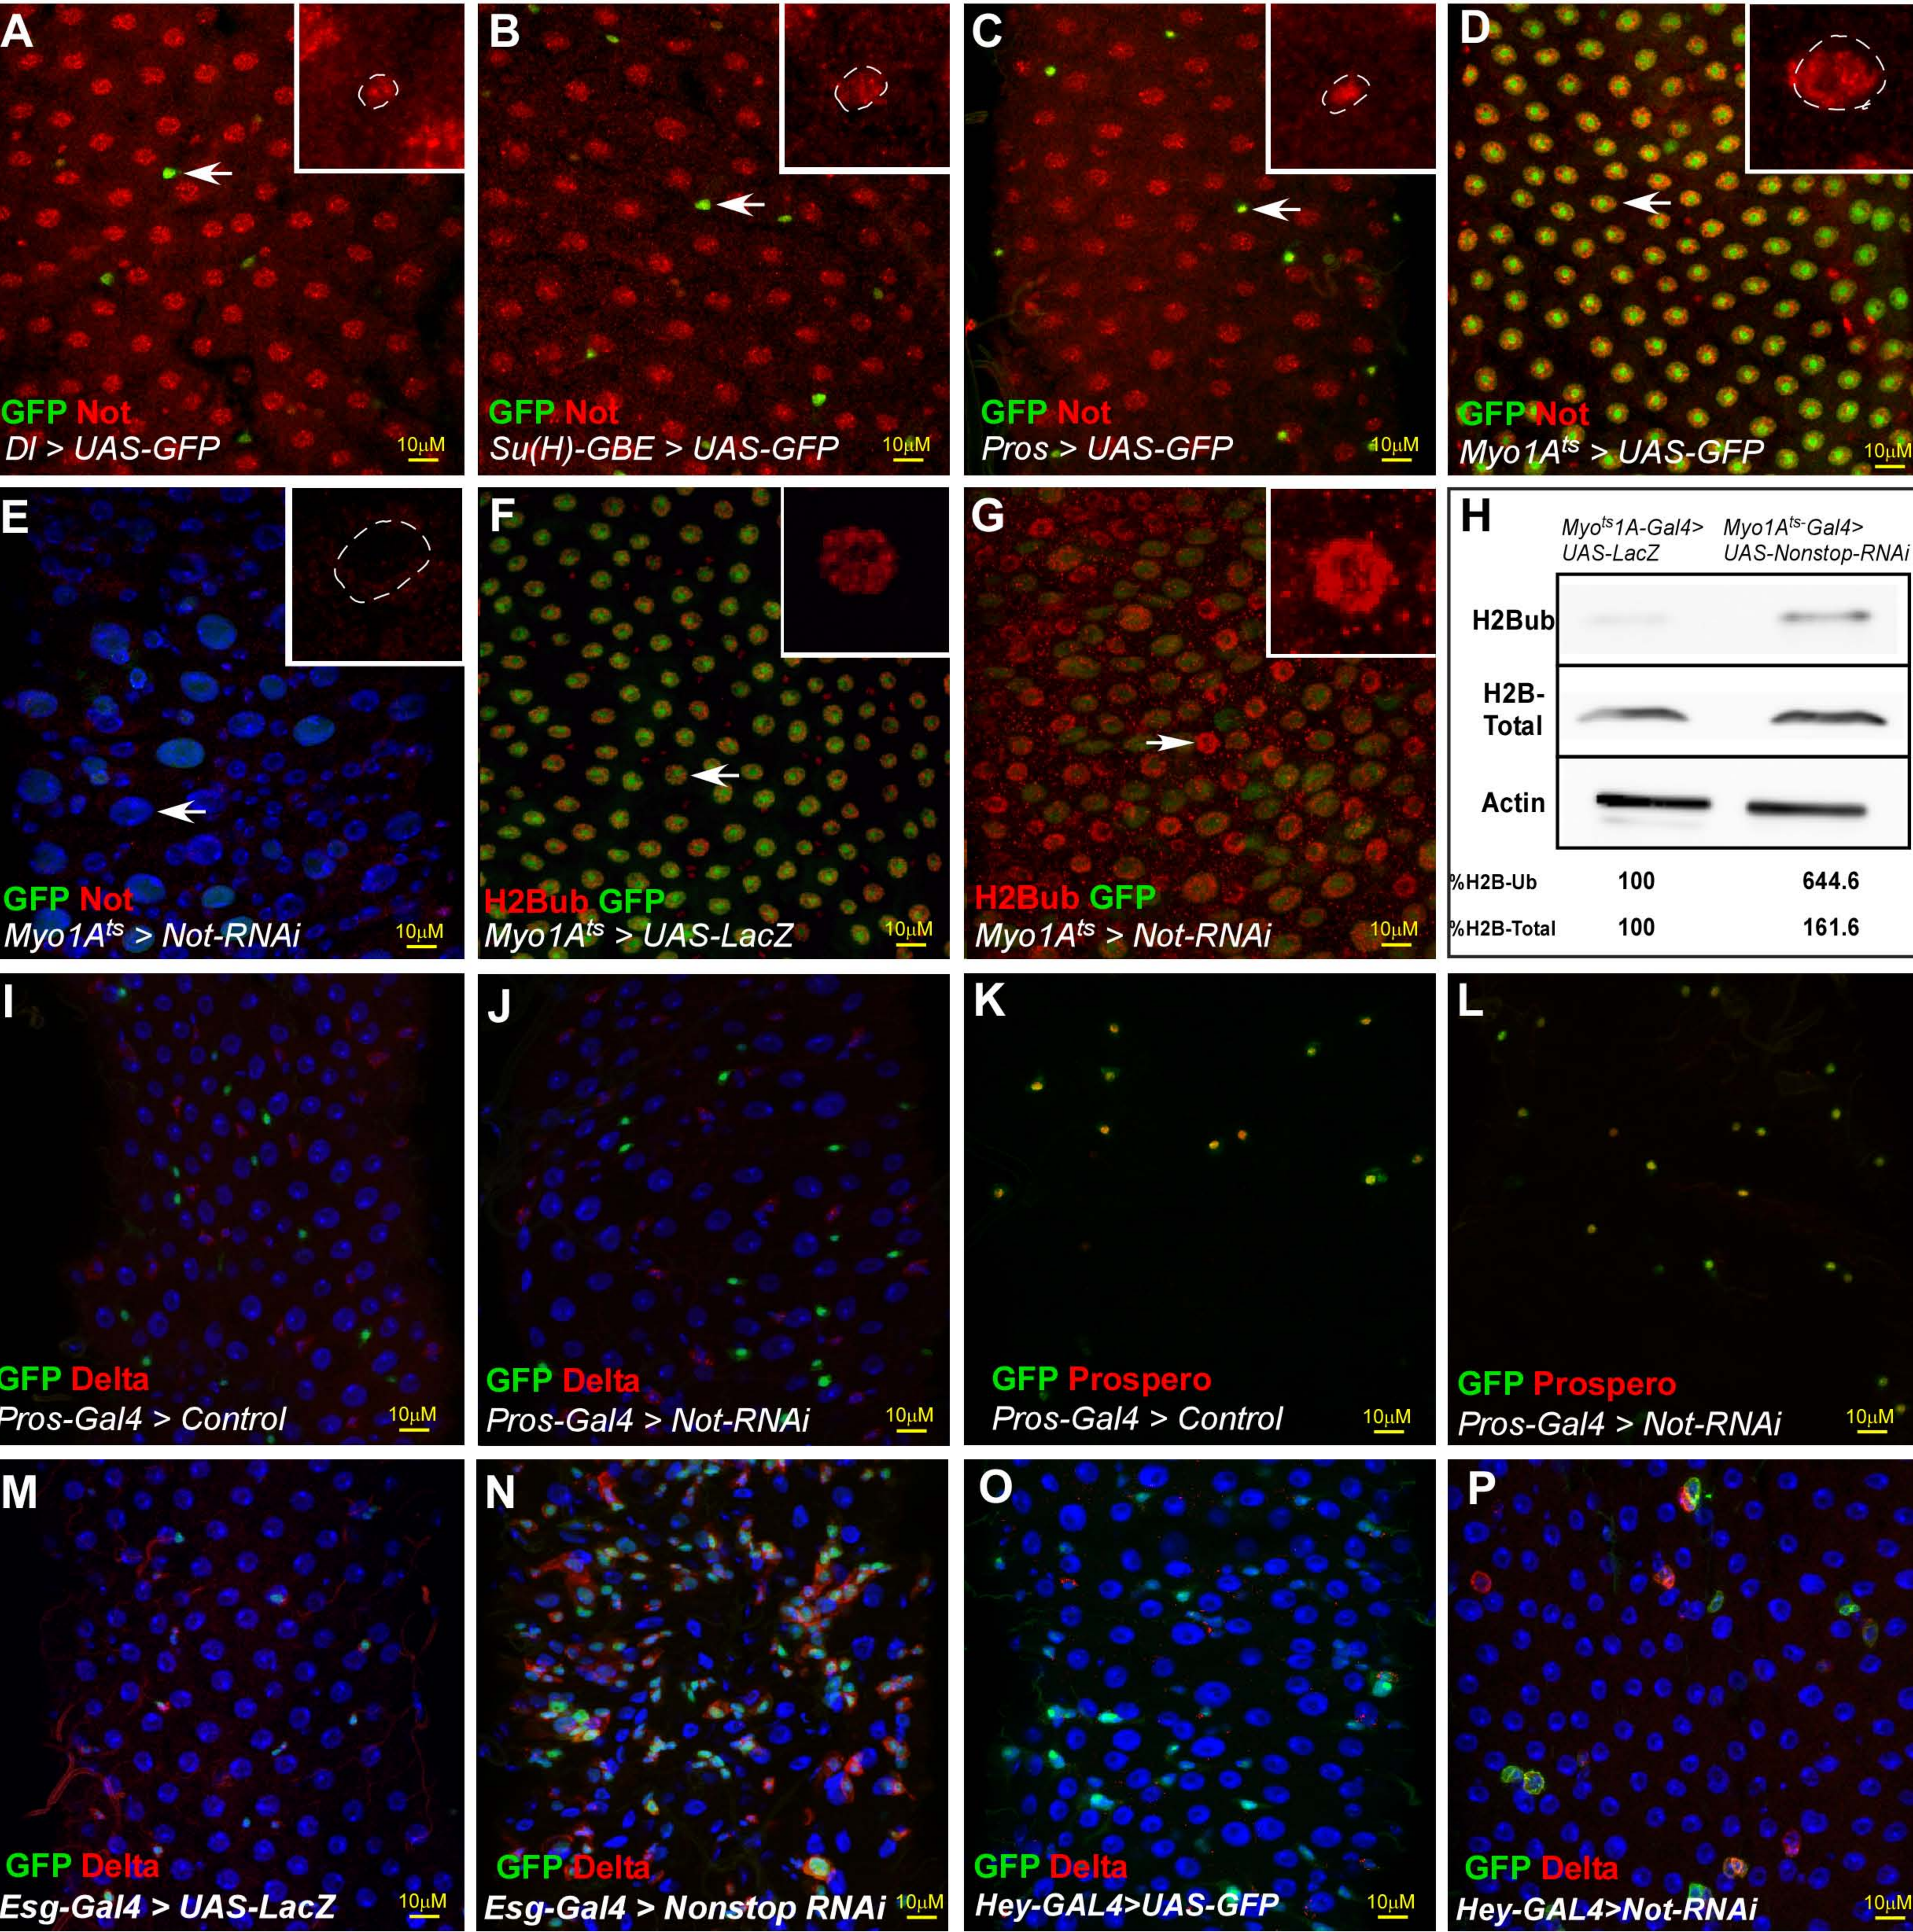

Supplement: supp [file elife-62312-supp-v1.zip › elife_poa_e62312_Figure_1_figure_supplement_2.pdf]

Figure 2 Fig supp. 1 : Erez *et al.*

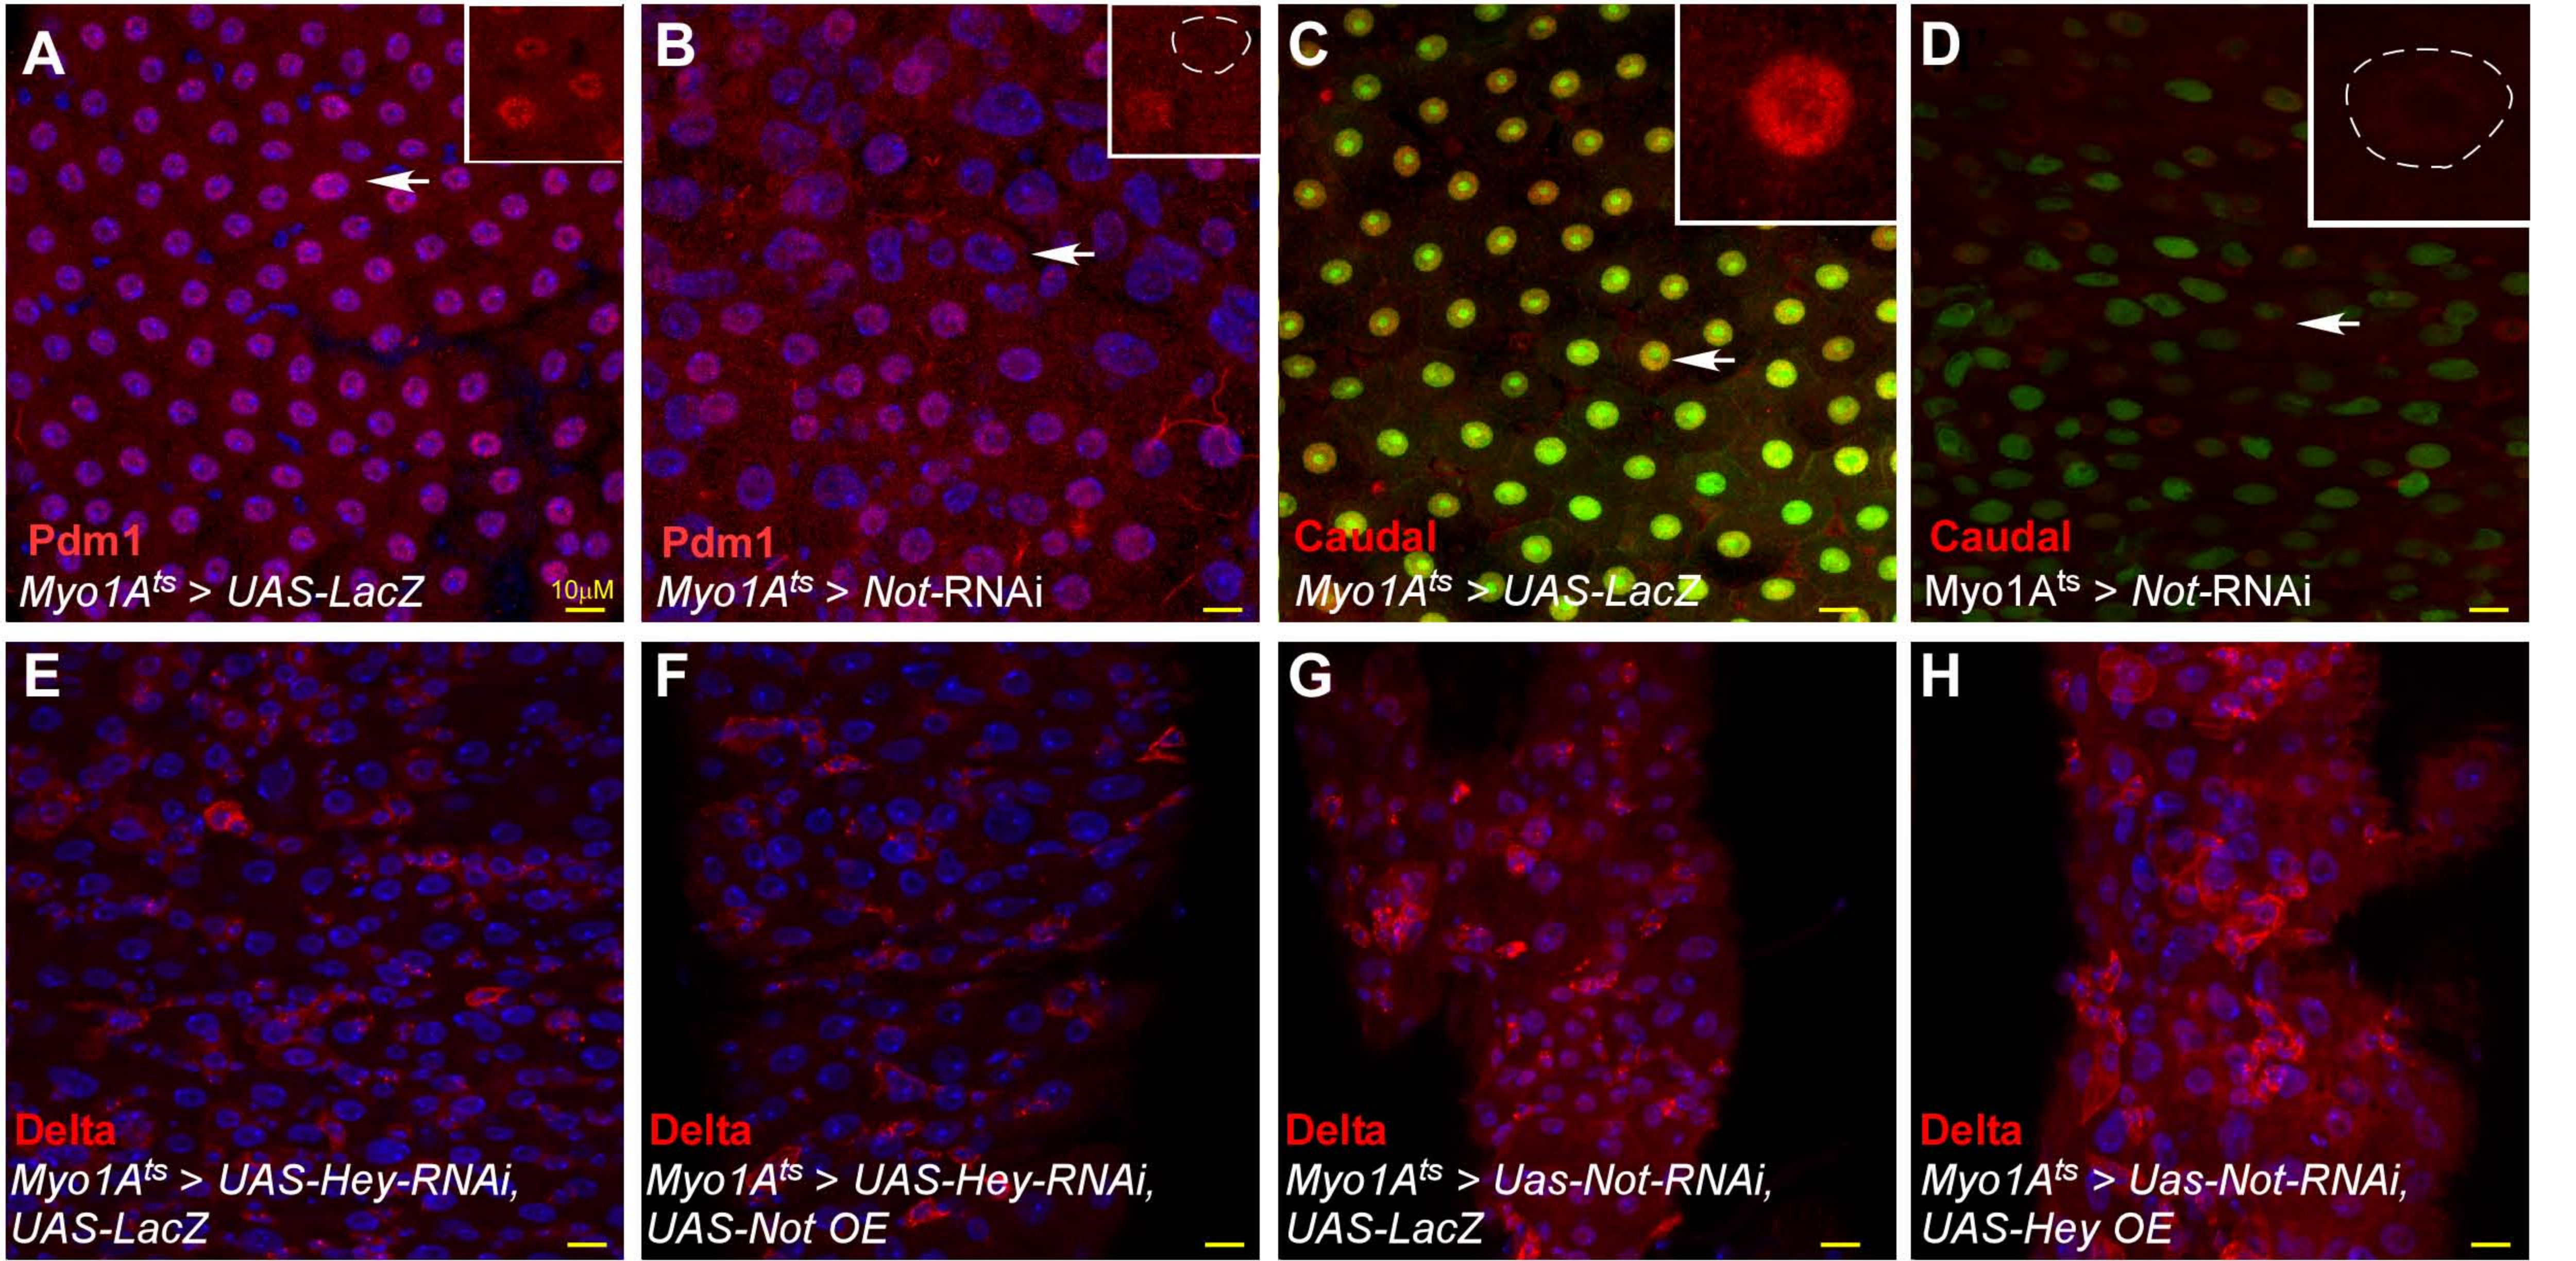

Supplement: supp [file elife-62312-supp-v1.zip › elife_poa_e62312_Figure_2_figure_supplement_1.pdf]

Figure 2 Fig. supp. 2: Erez et. al.

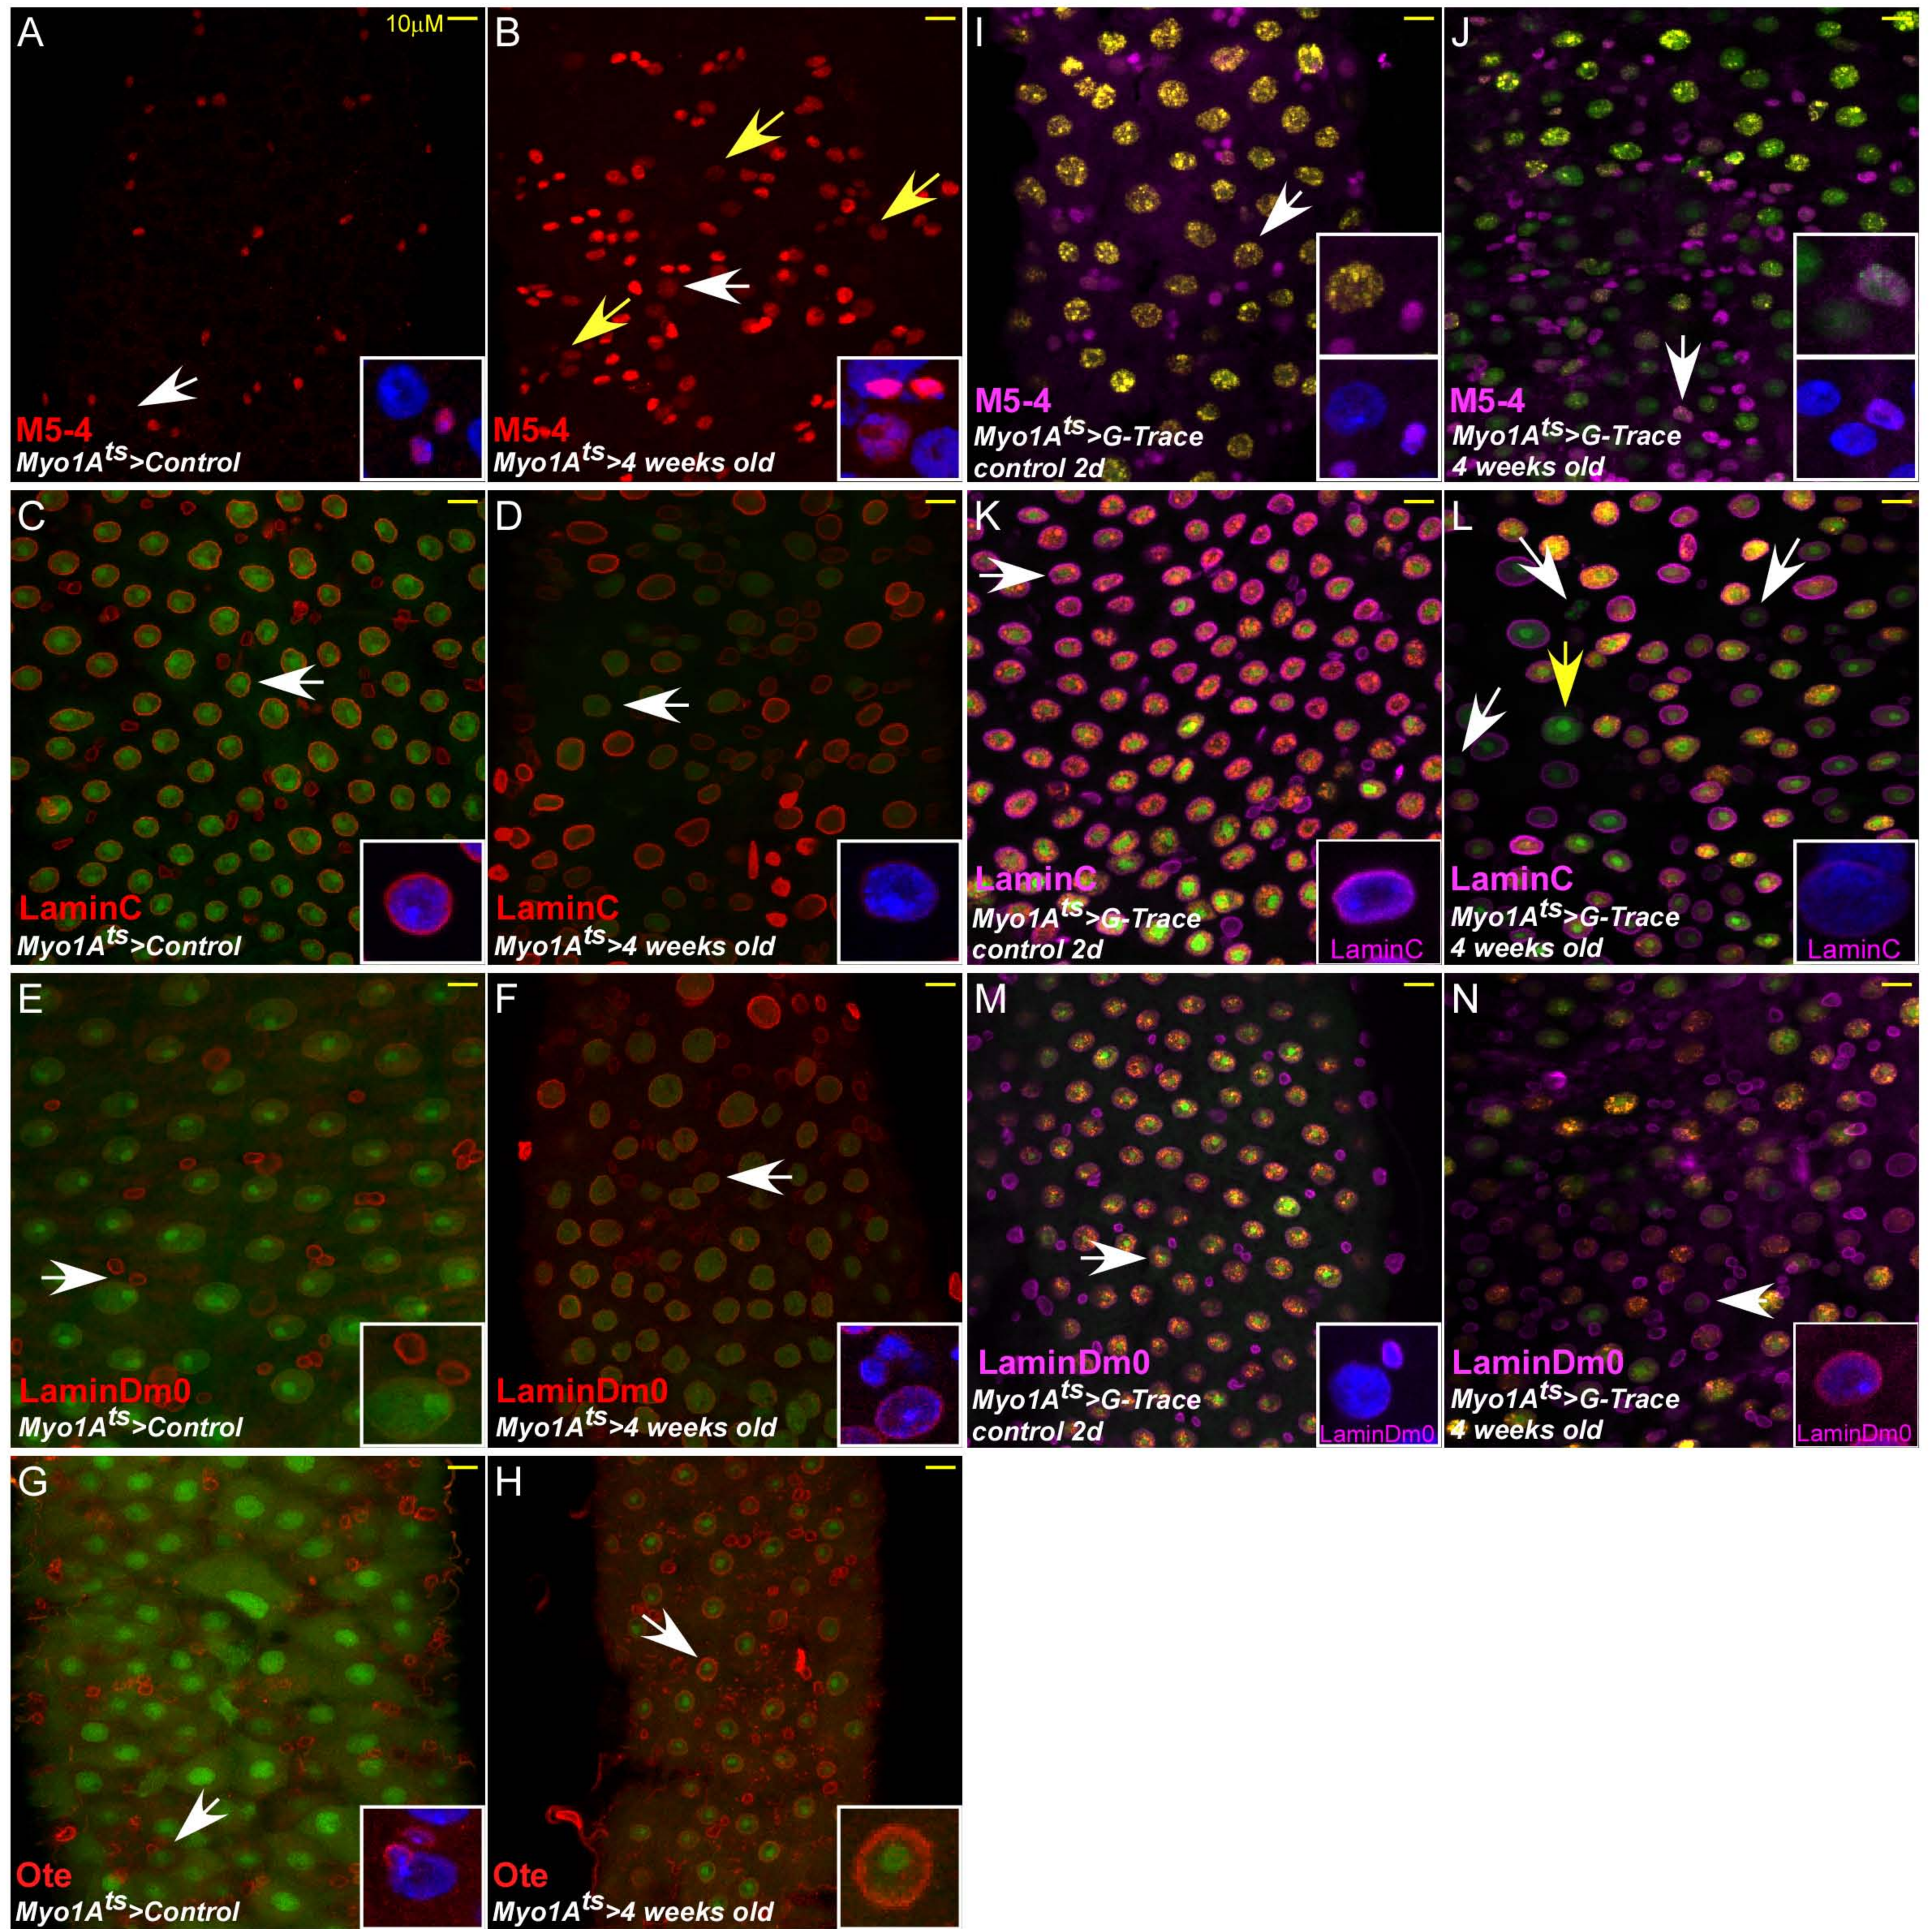

Supplement: supp [file elife-62312-supp-v1.zip › elife_poa_e62312_Figure_2_figure_supplement_2.pdf]

Figure 2 - Fig supp 3: Erez *et. al.*

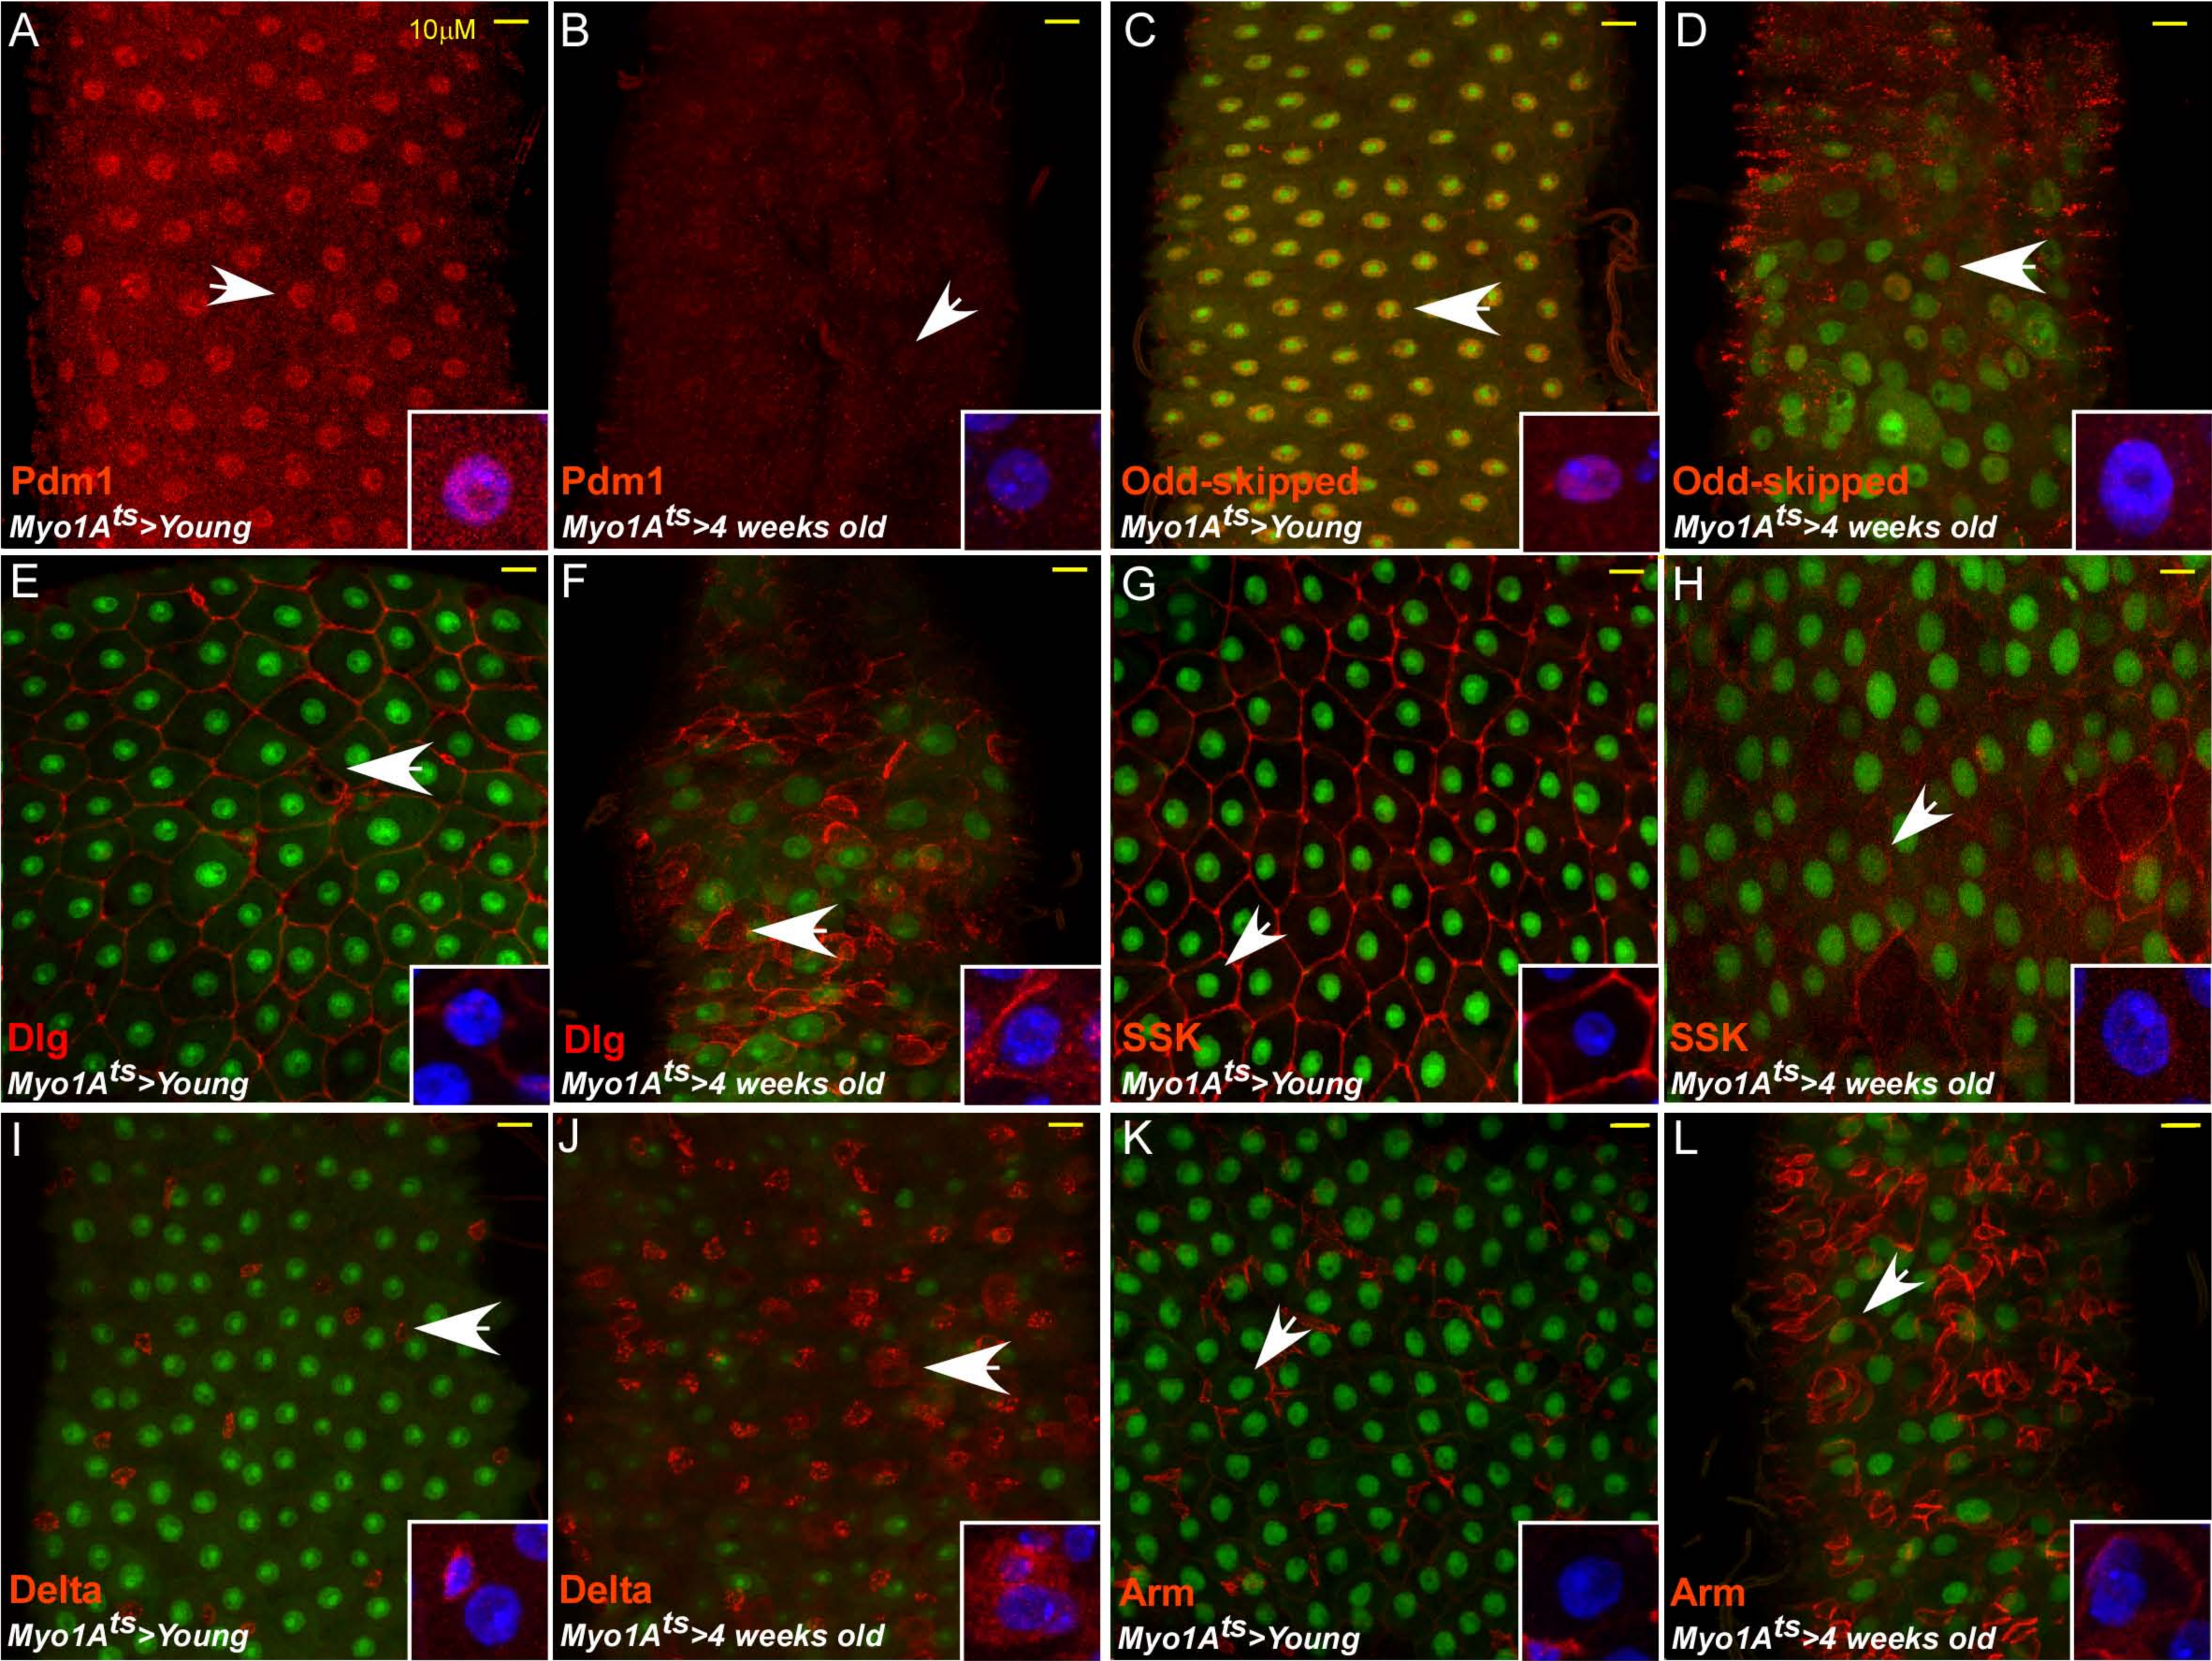

Supplement: supp [file elife-62312-supp-v1.zip › elife_poa_e62312_Figure_2_figure_supplement_3.pdf]

Figure 3 Fig Supp 1: Erez *et al*

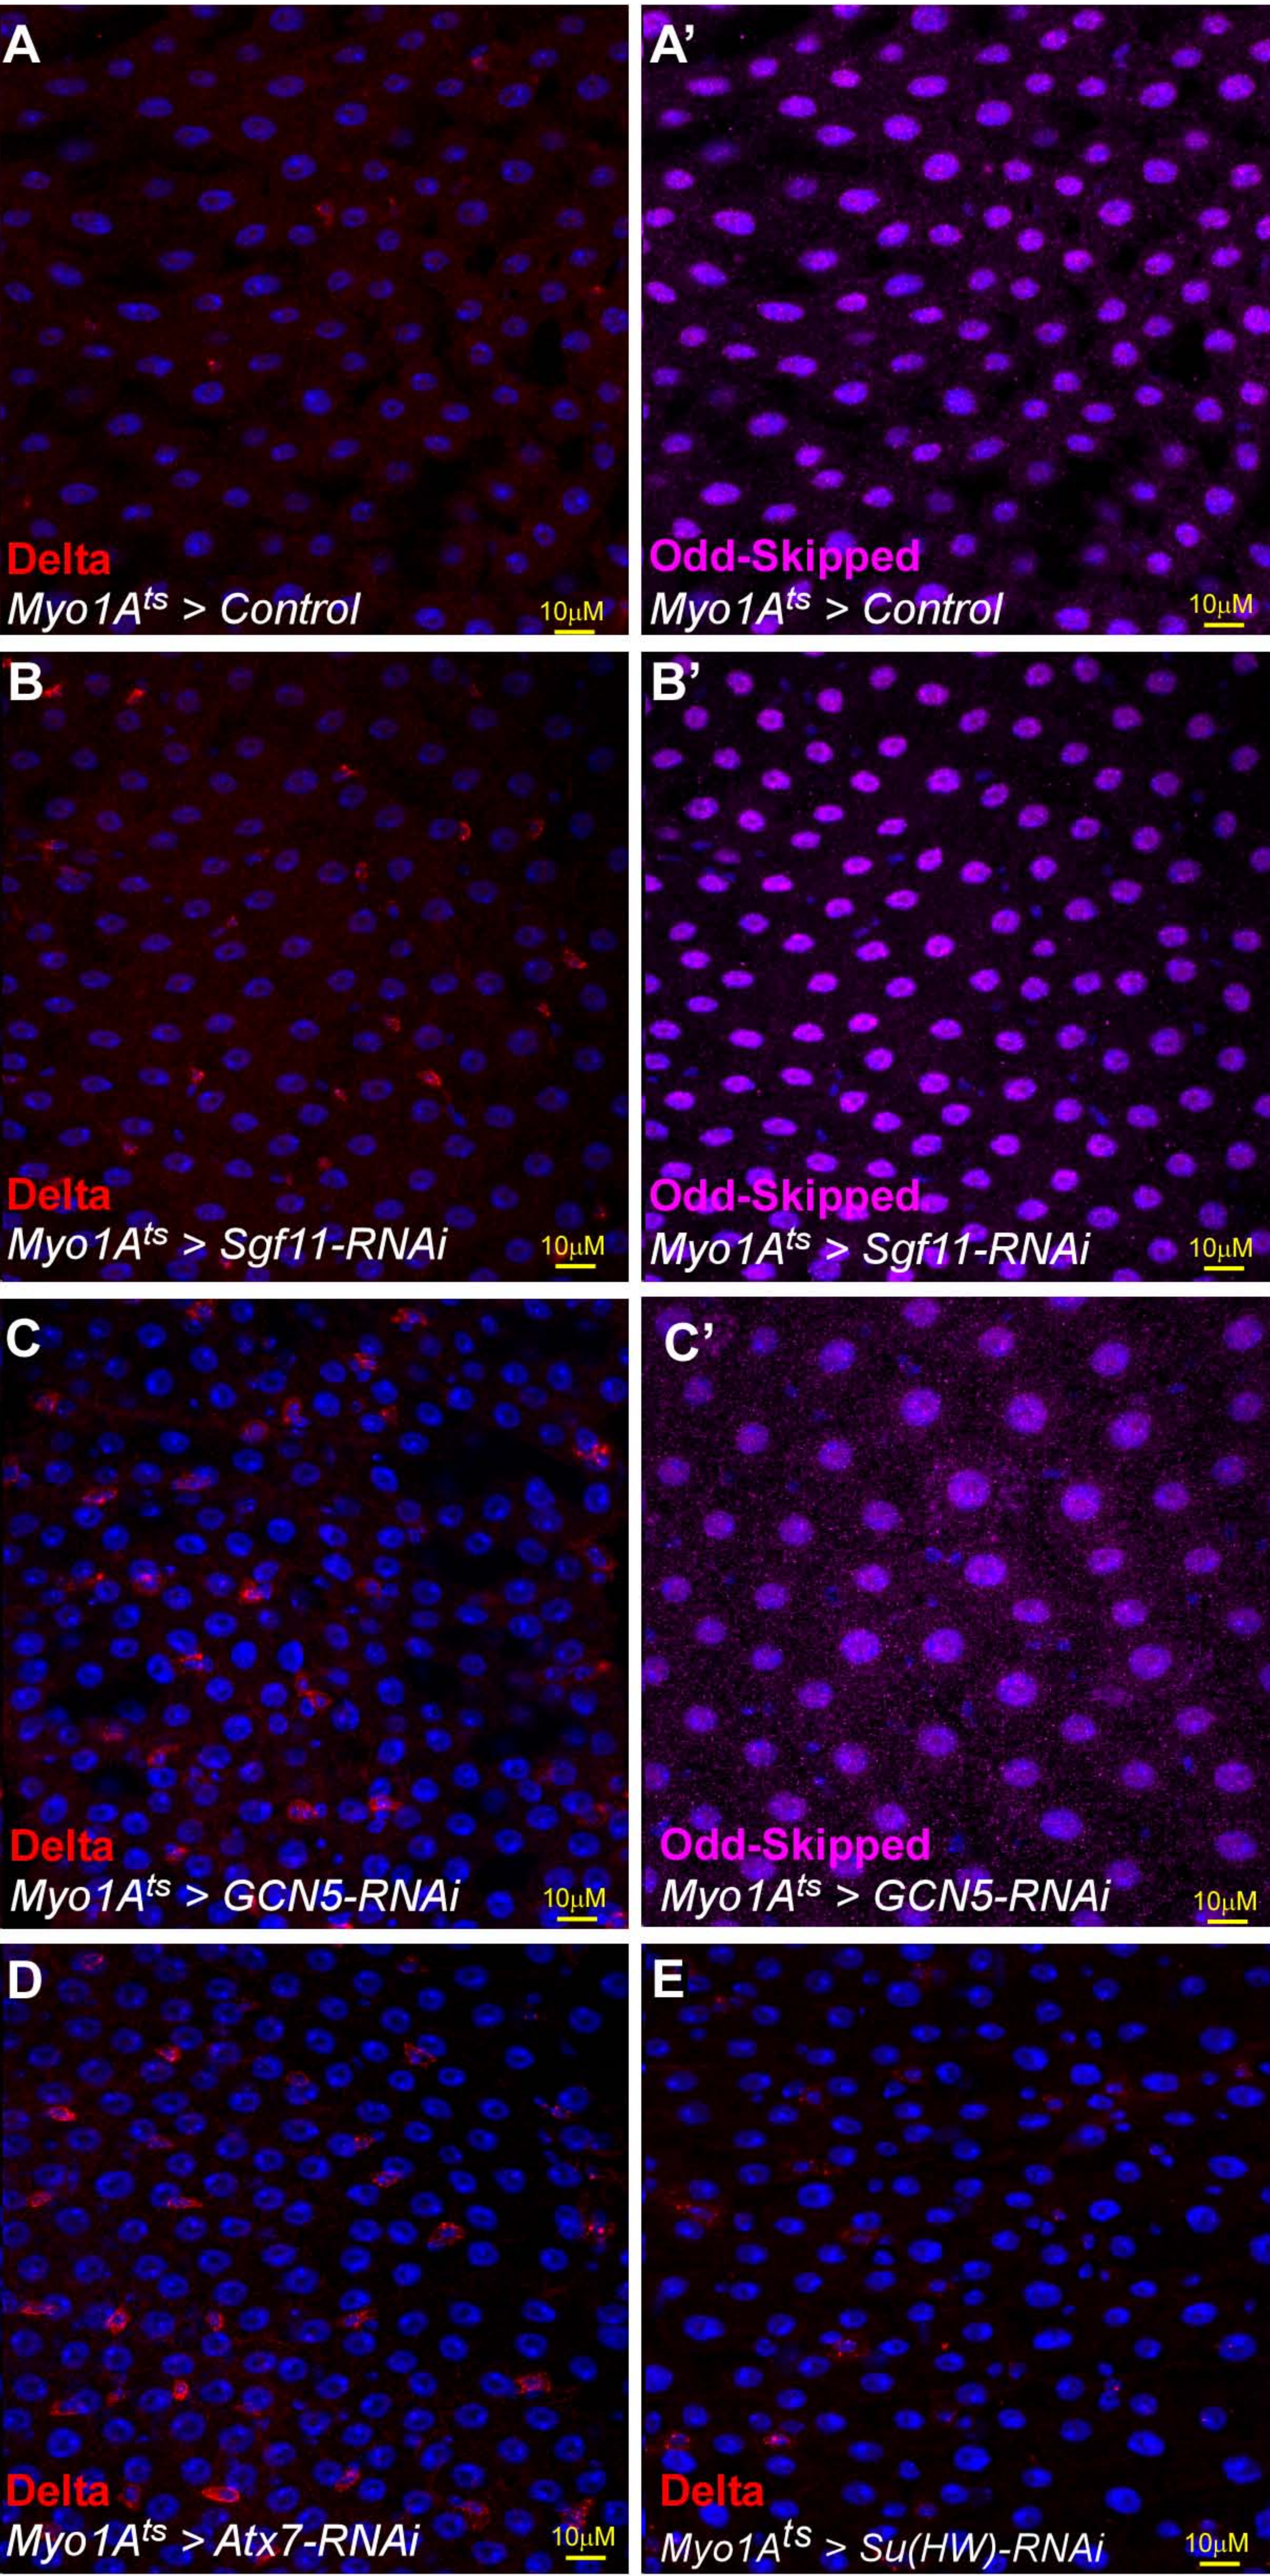

F

|                   | BD-Not | BD |
|-------------------|--------|----|
| AD-e(γ)2          | —      | —  |
| AD-Sgf11          | —      | —  |
| AD-e(γ)2+Sgf11    | +      | —  |
| AD-e(γ)2-2A-Sgf11 | +      | —  |

Supplement: supp [file elife-62312-supp-v1.zip › elife_poa_e62312_Figure_3_figure_supplement_1.pdf]

Figure 5 Fig. supp. 1; Erez *et al.*

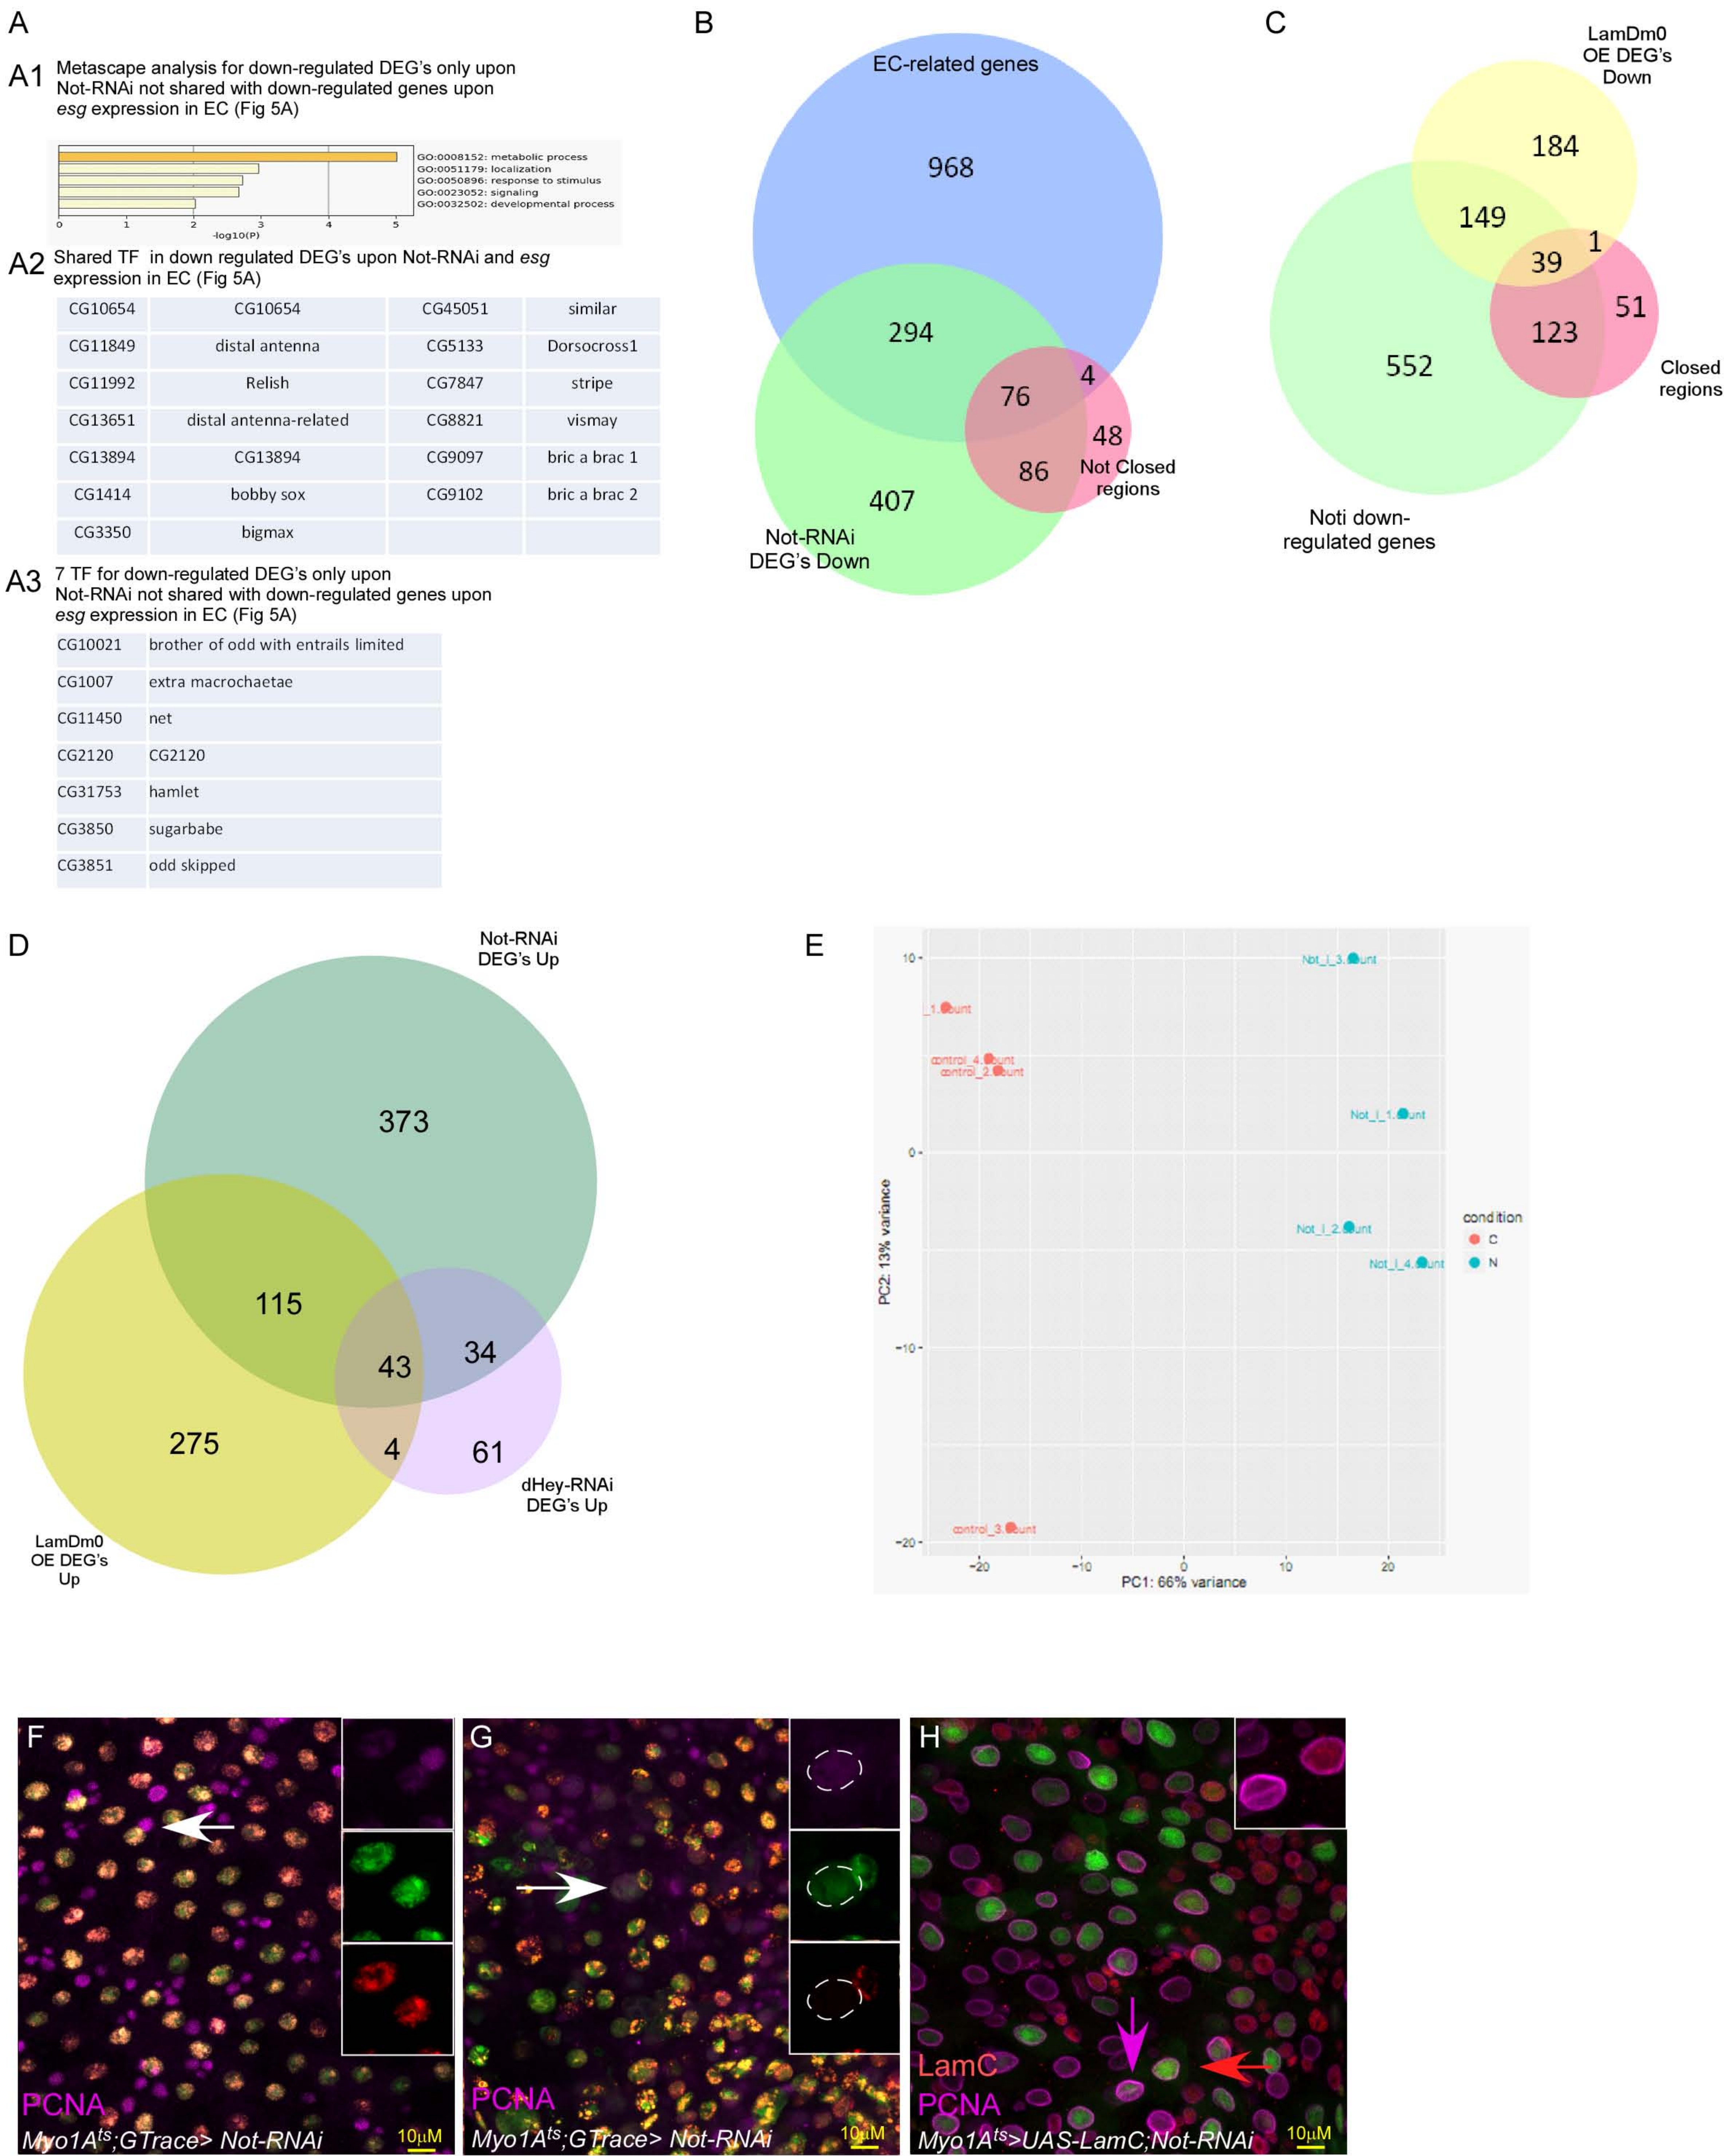

Supplement: supp [file elife-62312-supp-v1.zip › elife_poa_e62312_Figure_5_figure_supplement_1.pdf]

Figure 6 Fig. Supp 1 Erez *et al.*

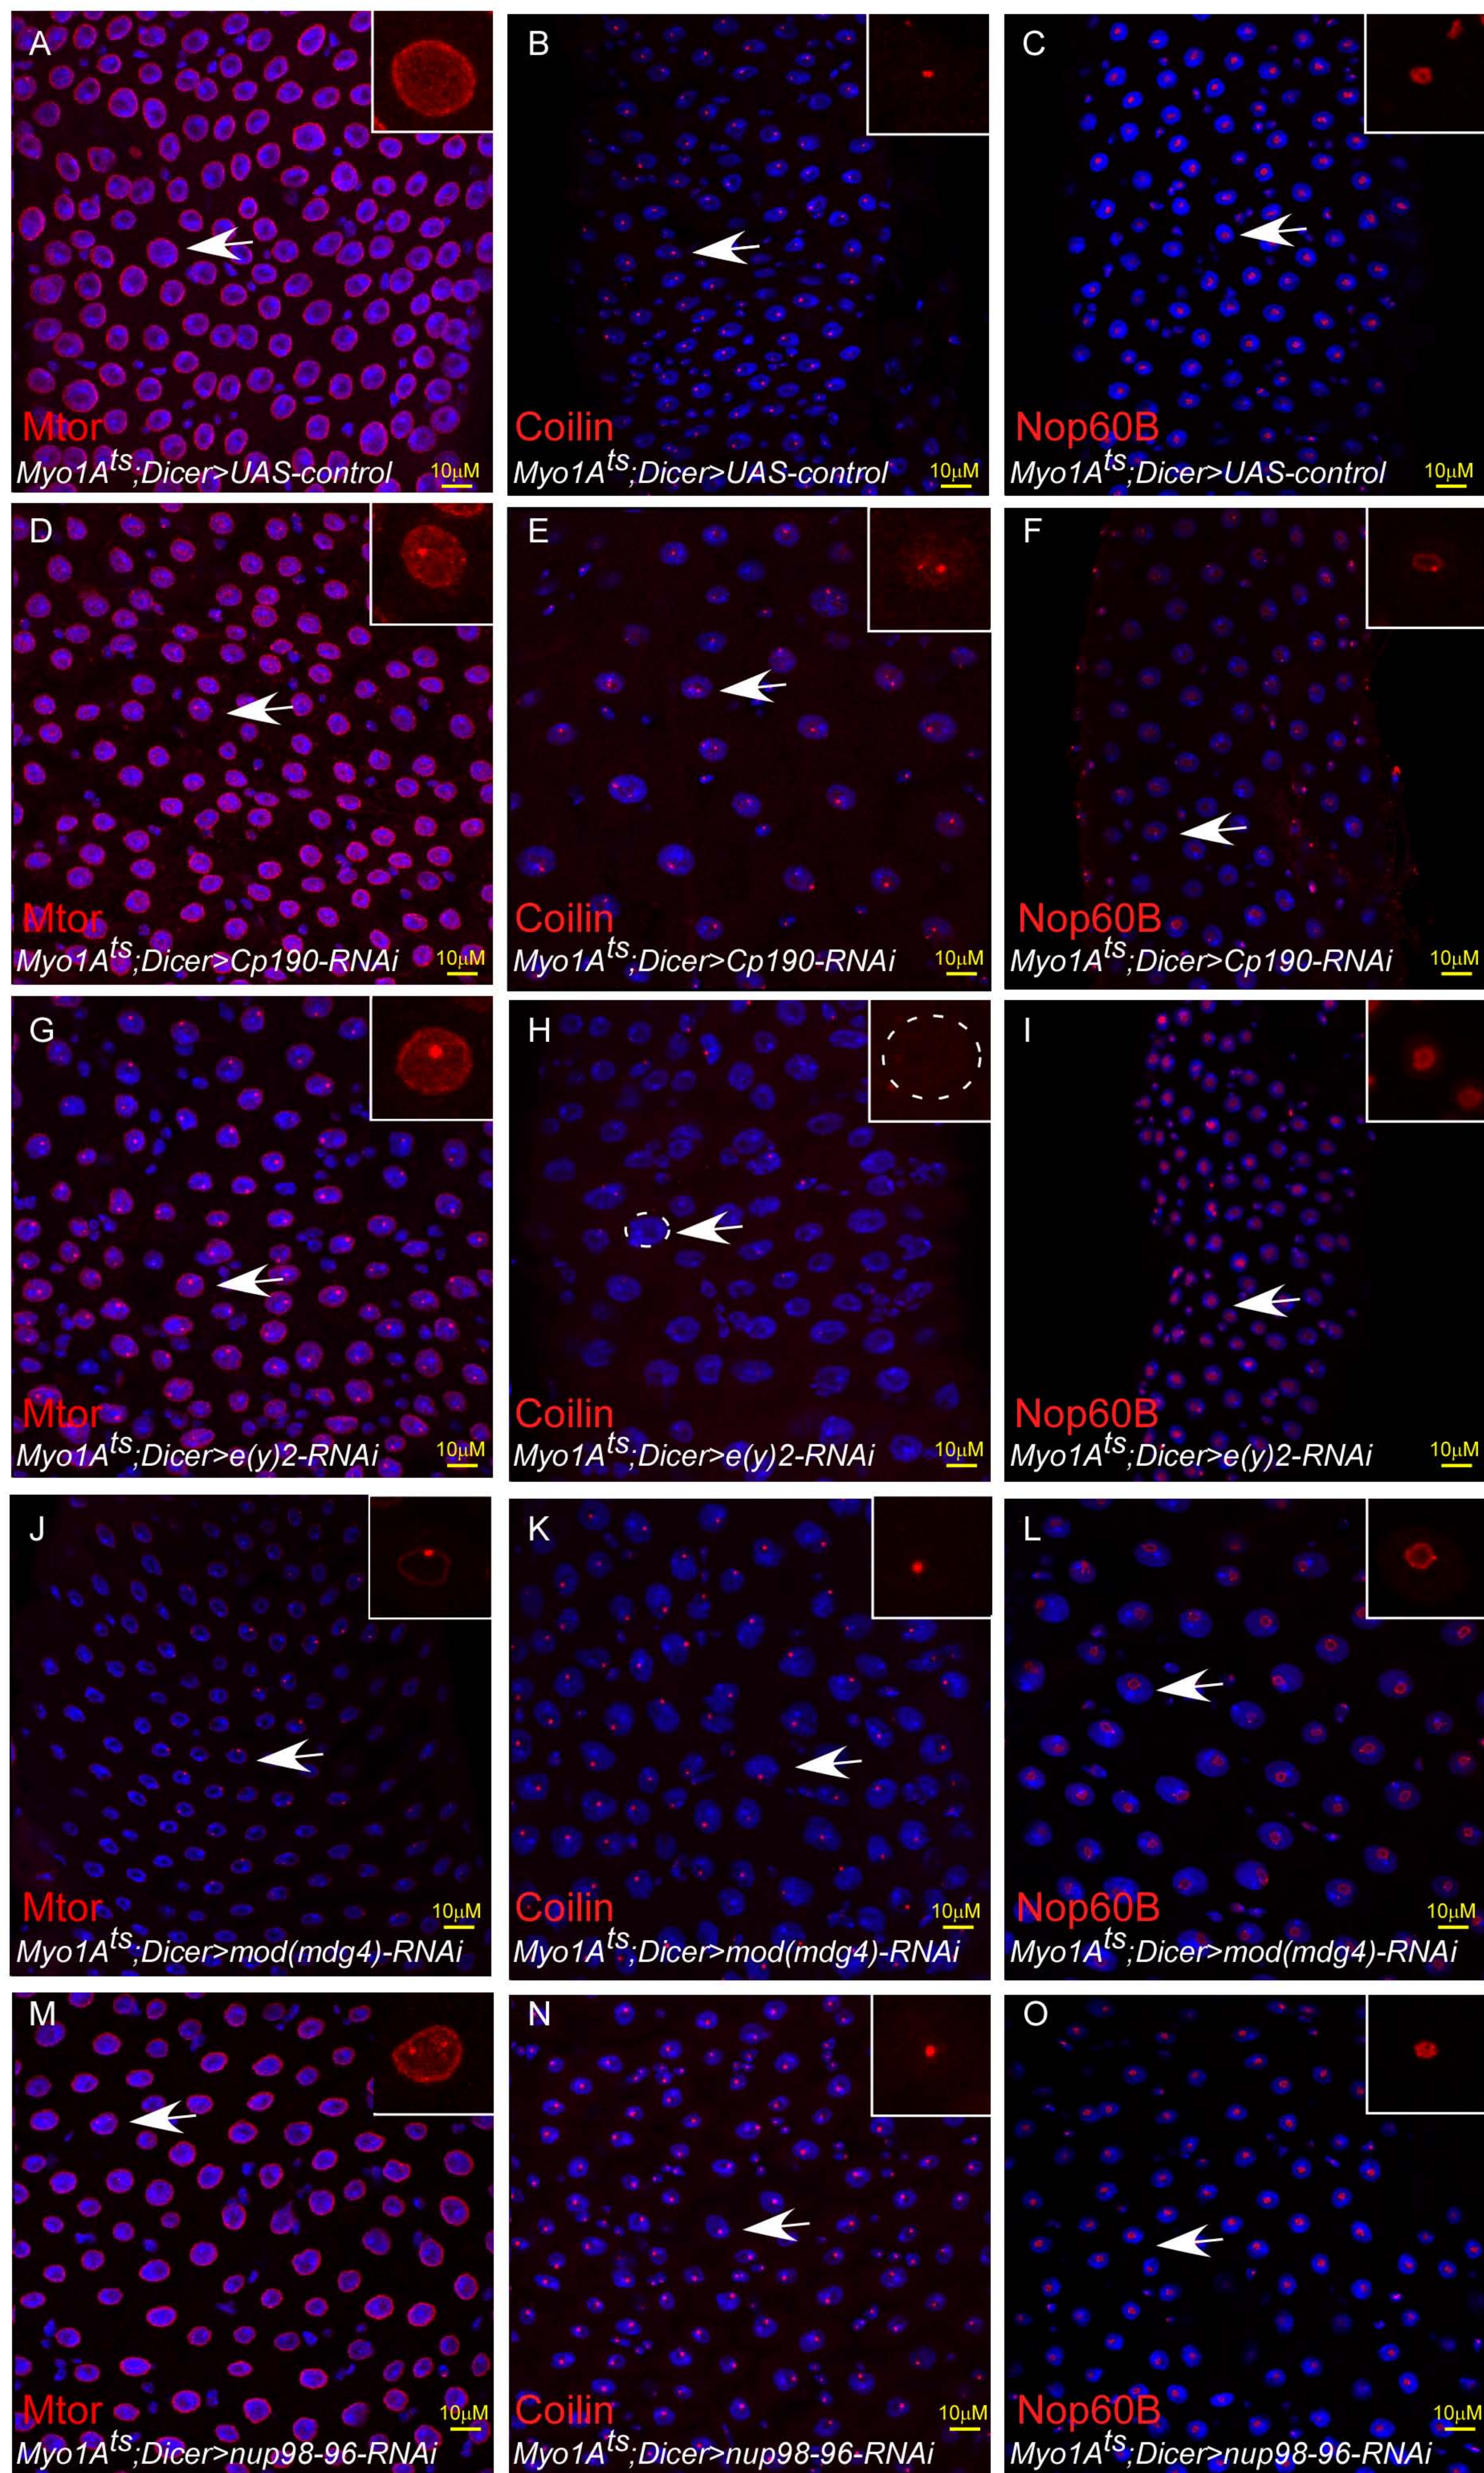

Supplement: supp [file elife-62312-supp-v1.zip › elife_poa_e62312_Figure_6_figure_supplement_1.pdf]

Figure 8 Fig. supp. 1: Erez *et al*

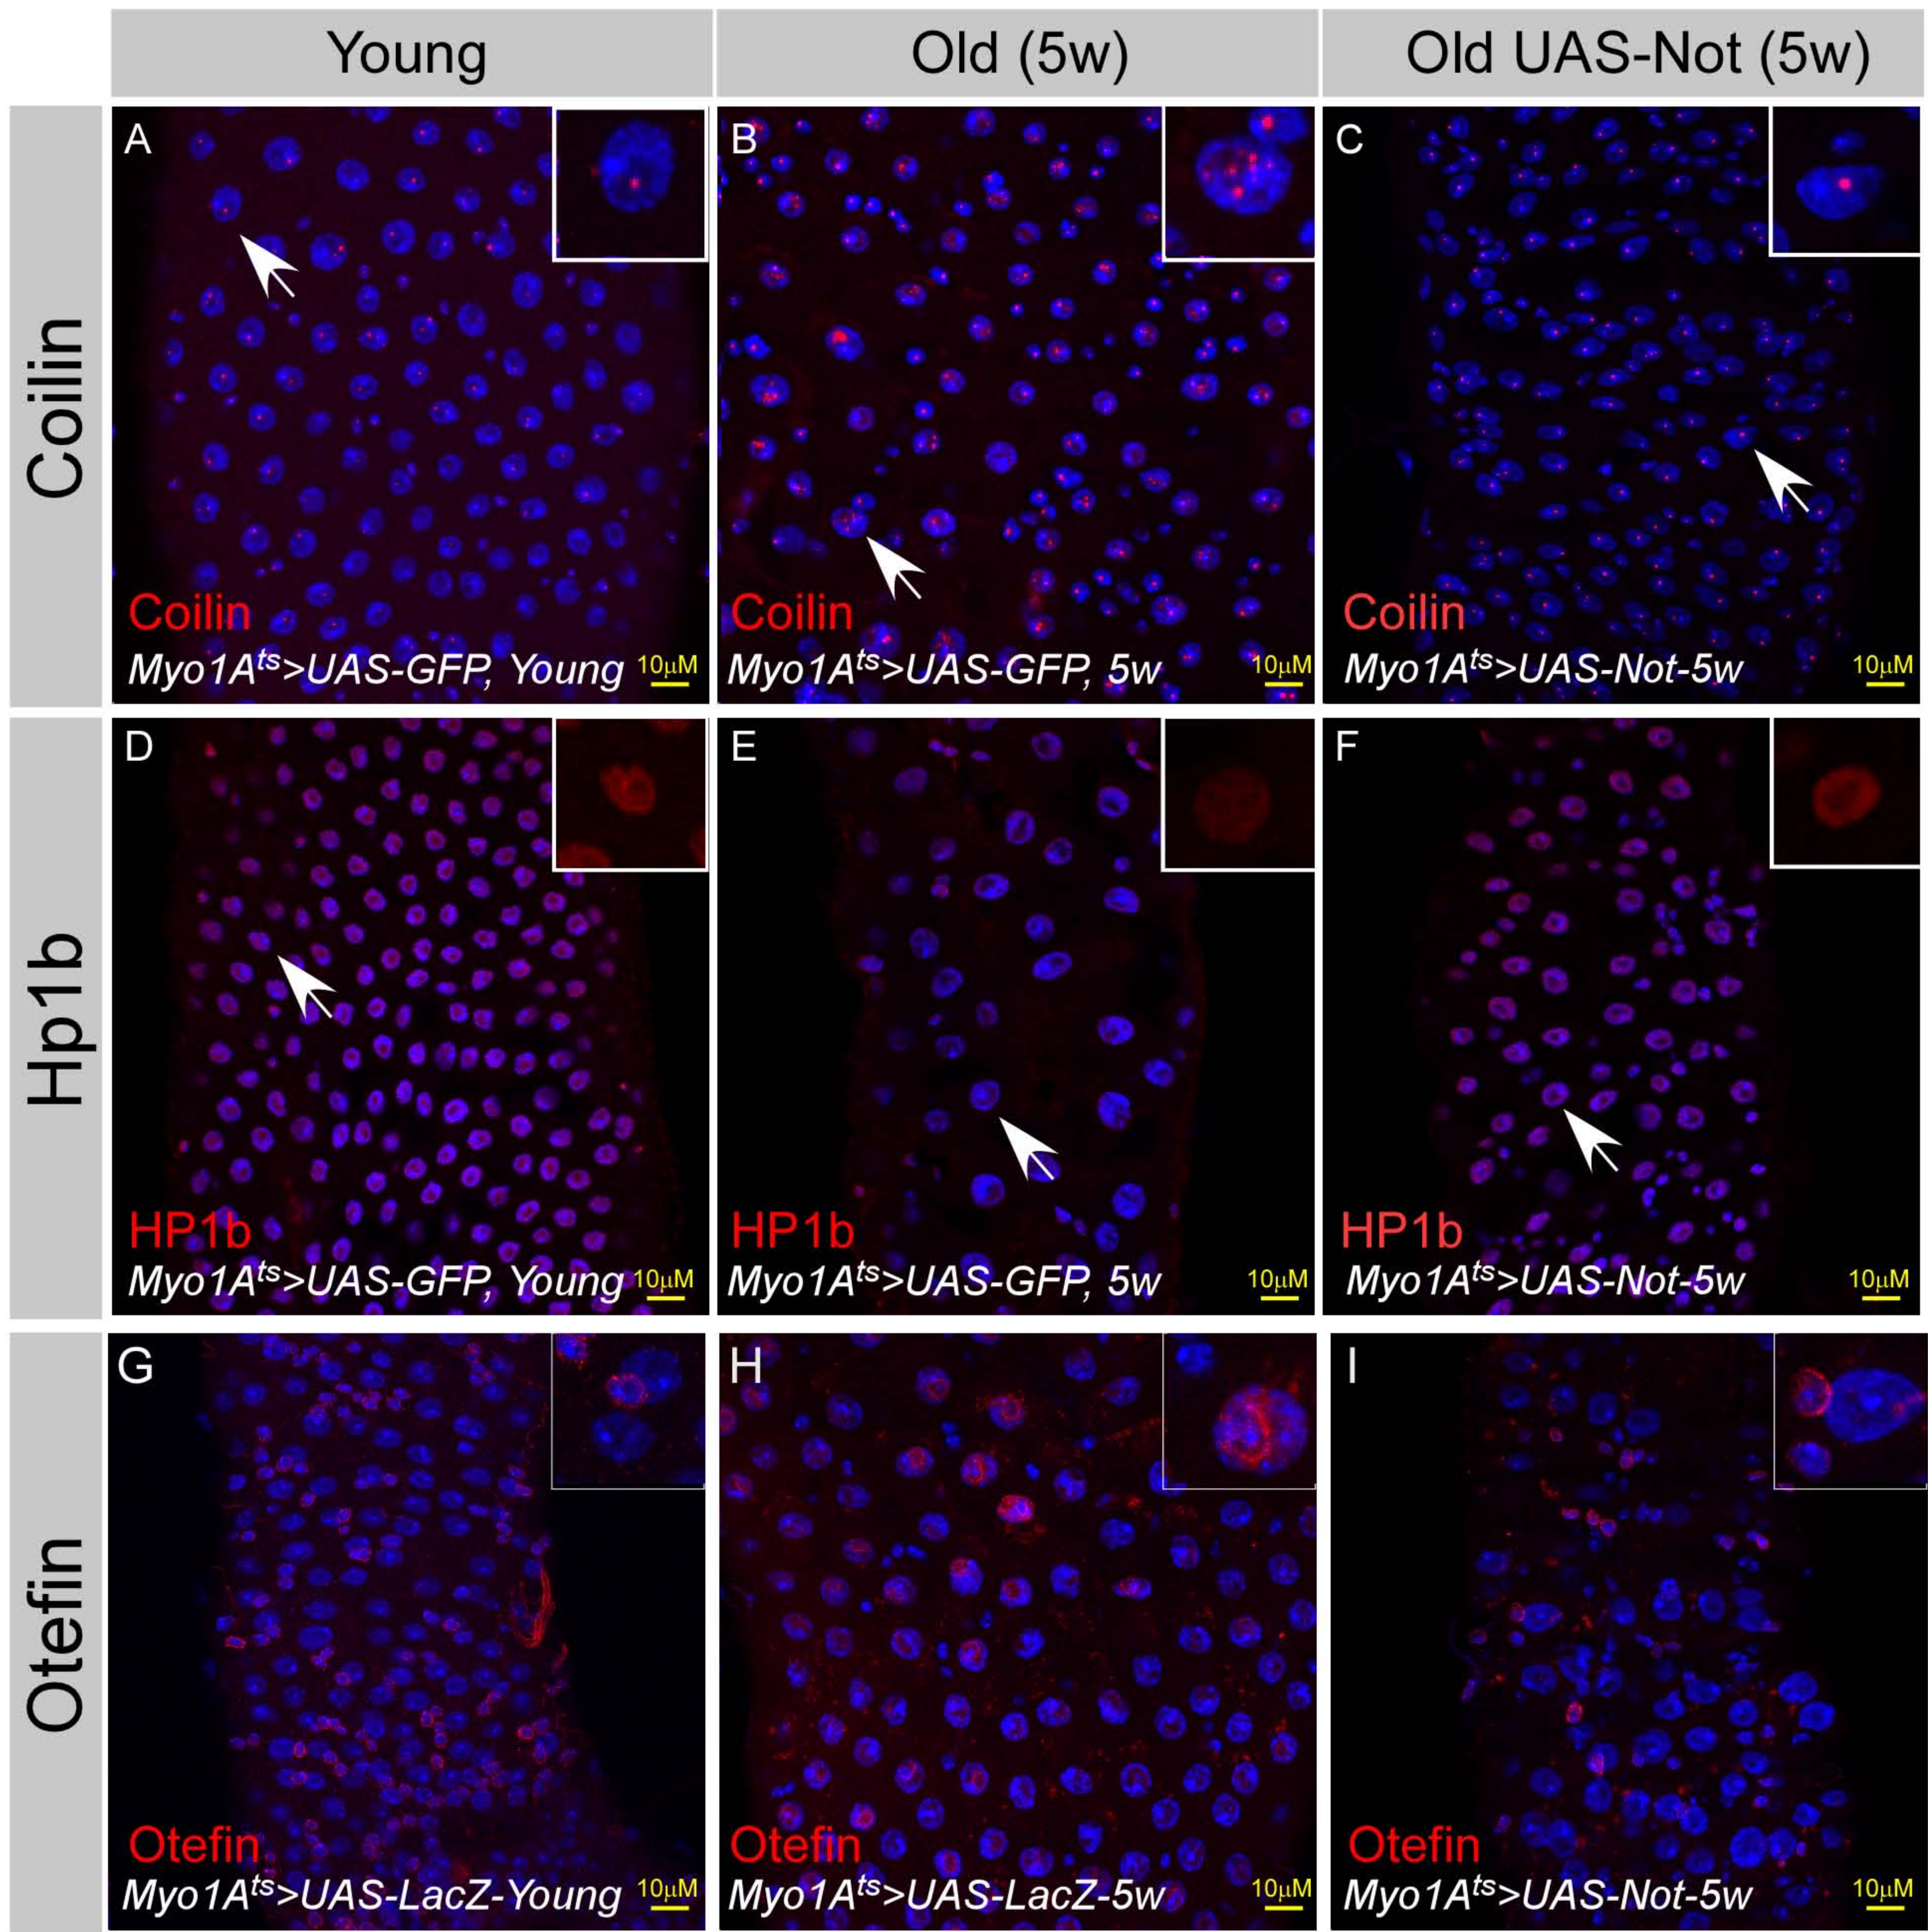

Supplement: supp [file elife-62312-supp-v1.zip › elife_poa_e62312_Figure_8_figure_supplement_1.pdf]
